# Supplementary material for: Fully synthetic Mincle-dependent self-adjuvanting cancer vaccines elicit robust humoral and T cell-dependent immune responses and protect mice from tumor development
Source: Royal Society of Chemistry journal article supplement (doi:10.1039/d1sc05736g), 2021-01-01
Supplement: d1sc05736g1.pdf [file d1sc05736g1.pdf]

## Supporting Information

### Fully synthetic Mincle-dependent self-adjuvanting cancer vaccines elicit robust humoral and T cell-dependent immune responses and protect mice from tumor development

Xiang Luo,<sup>‡</sup> Qinghai Lian,<sup>‡</sup> Wenwei Li,<sup>‡</sup> Liqing Chen, Renyu Zhang, Deying Yang, Lingqiang Gao, Xiaoxiao Qi, Zhongqiu Liu,\* Guochao Liao\*

*Joint Laboratory for Translational Cancer Research of Chinese Medicine of the Ministry of Education of the People's Republic of China, International Institute for Translational Chinese Medicine, Guangzhou University of Chinese Medicine, Guangzhou 510006, China*

<sup>‡</sup> These authors contributed equally to this work

### Table of contents

|                                                                                         |     |
|-----------------------------------------------------------------------------------------|-----|
| I. General Information .....                                                            | S1  |
| II. Preparation and Characterization of Conjugates 1 and 2 .....                        | S1  |
| III. Preparation and Characterization of STn.....                                       | S13 |
| IV. Preparation and Characterization of Conjugates 3 and 4.....                         | S16 |
| V. Analysis of Sialic Acid Loading of STn-CRM197 and STn-HSA .....                      | S21 |
| VI. Synthesis of Triazole-HSA Conjugate.....                                            | S25 |
| VII. Synthesis of Mincle Ligands Vizantin and TDB.....                                  | S26 |
| VIII. Binding affinity of conjugates 1-4 to hMincle .....                               | S28 |
| IX. Abilities of conjugates 1-4 to induce the production of TNF- $\alpha$ and IL-6..... | S28 |
| X. Liposomes Size Analysis of the Conjugates 1-4.....                                   | S29 |
| XI. Calculated Antibody Titers of ELISA Experiments .....                               | S32 |
| XII. ELISpot Assay.....                                                                 | S35 |
| XIII. FACS Analyses .....                                                               | S36 |
| XIV. Antibody-Mediated Complement-Dependent Cytotoxicity (CDC).....                     | S36 |
| XV. Tumor Challenge Studies .....                                                       | S37 |
| References.....                                                                         | S38 |
| NMR and MS Spectra of Synthesized Compounds.....                                        | S39 |

## I. General Information

All starting materials and reagents were obtained commercially and used without further purification unless otherwise specified. Molecular sieves 4 Å were flame-dried under vacuum and cooled to rt under N<sub>2</sub> atmosphere immediately before use. The reactions were monitored by thin-layer chromatography (TLC) on glass-packed precoated silica gel plates and visualized by a UV detector or charring with 10% H<sub>2</sub>SO<sub>4</sub> in EtOH (v/v). Purification of products was accomplished by flash column chromatography on silica gel (200-300 mesh). NMR spectra were recorded on a Bruker Avance III 400 or Avance II 600 spectrometer (<sup>1</sup>H at 400 or 600 MHz, <sup>13</sup>C at 100 or 150 MHz) with chemical shifts reported in ppm using TMS as the internal standard. Signal splitting patterns are described as singlet (s), doublet (d), triplet (t), quartet (q), or multiplet (m), with coupling constants (*J*) in hertz. MALDI-TOF mass spectrometry was obtained with a Bruker Ultraflex instrument by applying the matrix of 2,5-dihydroxybenzoic acid (DHB). The high resolution electron spray ionization mass spectra (HR-ESI-MS) were obtained using a Waters Micromass-LCTPremier-XE mass spectrometer.

## II. Preparation and Characterization of Conjugates 1 and 2

### 4,6,4',6'-di-*O*-(*p*-methoxybenzylidene)- $\alpha,\alpha$ -*D*-trehalose (**13**)

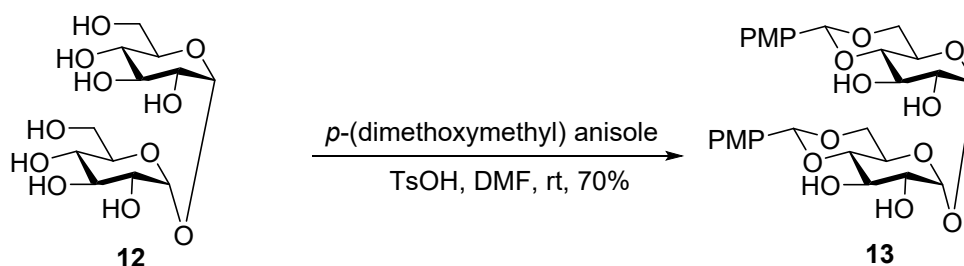

The synthesis of compound **13** was according to published procedure.<sup>1</sup> White solid, 70% yield. <sup>1</sup>H NMR (400 MHz, CD<sub>3</sub>OD) δ 7.40 (d, *J* = 8.8 Hz, 4H), 6.87 (d, *J* = 8.8 Hz, 4H), 5.51 (s, 2H, PhCH), 5.11 (d, *J* = 3.8 Hz, 2H, H-1 and H-1'), 4.19 – 4.17 (m, 2H, H5 and H5'), 4.12 - 4.06 (m, 2H, H-3 and H-3'), 4.01 (t, *J* = 9.6 Hz, 2H, H-4

and H-4'), 3.77 (s, 6H), 3.69 (t,  $J = 10.4$  Hz, 2H), 3.61 (dd,  $J = 9.2, 4.0$  Hz, 2H), 3.45 (t,  $J = 9.6$  Hz, 2H), 3.31 - 3.29 (m, 2H). HRMS (ESI-TOF)  $m/z$ :  $[M + H]^+$  calcd for  $C_{28}H_{35}O_{13}$ , 579.2072; Found, 579.2067.

**2,3,2',3'-Tetra-*O*-benzyl-4,6,4',6'-di-*O*-(*p*-methoxybenzylidene)- $\alpha,\alpha$ -*D*-trehalose (14)**

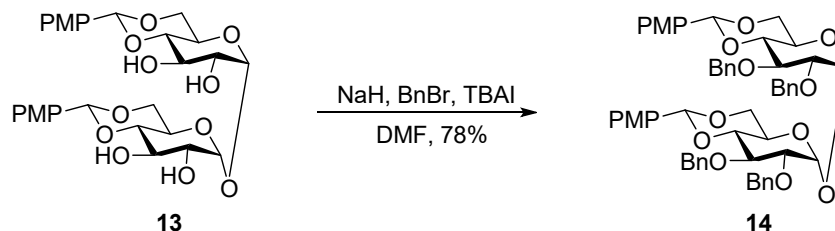

NaH (60% in oil, 1.64 g, 30.5 mmol) was added to a solution of compound **13** (11.9 g, 20.5 mmol) in anhydrous DMF (60 mL) at 0 °C under  $N_2$  atmosphere. Then, benzyl bromide (14.6 mL, 123 mmol) and TBAI (751.2 mg, 2.03 mmol) were added and stirred for 3 h. After reaction for 18 h at rt, the reaction was quenched by MeOH, and filtered. The mixture was diluted with ethyl acetate (300 mL), and washed with saturated brine. The organic layer was dried over anhydrous  $Na_2SO_4$ , and concentrated under reduced pressure. The crude product was purified by recrystallization (ethyl acetate (EA): petroleum ether (PE) = 4:1) to furnish compound **14** as a white solid (14.9 g, 78%).  $^1H$  NMR (400 MHz,  $CDCl_3$ )  $\delta$  7.51 – 7.24 (m, 28H), 5.55 (s, 2H, PhCH), 5.11 (d,  $J = 3.8$  Hz, 2H, H-1 and H-1'), 4.96 (d,  $J = 11.1$  Hz, 2H, PhCH<sub>2</sub>O), 4.85(d,  $J = 11.1$  Hz, 2H, PhCH<sub>2</sub>O), 4.83(d,  $J = 12.0$  Hz, 2H, PhCH<sub>2</sub>O), 4.72 (d,  $J = 12.0$  Hz, 2H, PhCH<sub>2</sub>O), 4.27 (dt,  $J = 10.0, 4.8$  Hz, 2H, H5 and H5'), 4.14 (t,  $J = 9.4$  Hz, 2H, H-3 and H3'), 4.12 – 4.10 (m, 2H, H-4 and H-4'), 3.83 (s, 6H), 3.69 – 3.59 (m, 6H). HRMS (ESI-TOF)  $m/z$ :  $[M + H]^+$  calcd for  $C_{56}H_{59}O_{13}$ , 939.3950; Found, 939.3933.

**2,3,2',3'-Tetra-*O*-benzyl-6,6'-di-*O*-(*p*-methoxybenzylidene)- $\alpha,\alpha$ -*D*-trehalose (11)**

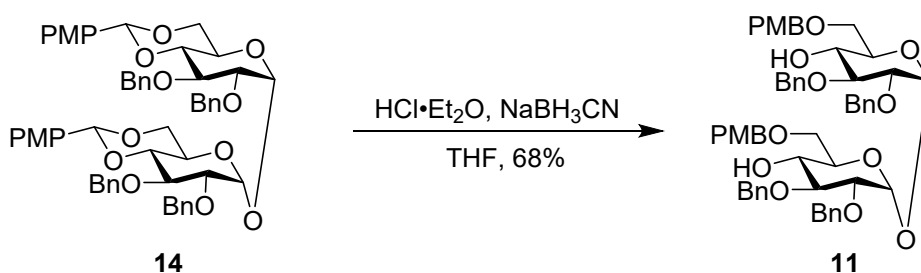

To a mixture of compound **14** (2.0 g, 2.13 mmol),  $\text{NaBH}_3\text{CN}$  (2.68 g, 42.6 mmol) and a small number of methyl orange indicator in THF (45 mL) was added a solution of  $\text{HCl}\cdot\text{Et}_2\text{O}$  with a drop wise manner at 0 °C under  $\text{N}_2$  atmosphere. The reaction mixture was stirred for 6 h, quenched by ice water, and extracted with ethyl acetate. The organic layers were combined, dried with anhydrous  $\text{Na}_2\text{SO}_4$ , and concentrated in vacuo. The crude product was purified by silica gel column chromatography (PE/ES = 5 : 1) to afford compound **11** (1.3 g, 68%).  $^1\text{H}$  NMR (400 MHz,  $\text{CDCl}_3$ )  $\delta$  7.37 – 7.16 (m, 24H), 6.82 (d,  $J$  = 6.4 Hz, 4H), 5.20 (d,  $J$  = 3.6 Hz, 2H), 5.00 (d,  $J$  = 11.2 Hz, 2H), 4.80 (d,  $J$  = 11.2 Hz, 2H), 4.70 - 4.60 (q,  $J$  = 12.0 Hz, 4H), 4.40 (q,  $J$  = 12.0 Hz, 4H), 4.11 (t,  $J$  = 3.6 Hz, 1H), 4.09 (t,  $J$  = 3.6 Hz, 1H), 3.87 (t,  $J$  = 9.2 Hz, 2H), 3.77 (s, 6H), 3.64 (t,  $J$  = 9.2 Hz, 2H), 3.53 (dd,  $J$  = 9.6, 3.6 Hz, 2H), 3.51 – 3.43 (qd,  $J$  = 10.4, 4.0 Hz, 4H).  $^{13}\text{C}$  NMR (100 MHz,  $\text{CDCl}_3$ )  $\delta$  159.23, 138.85, 138.02, 130.05, 129.40, 128.55, 128.42, 128.01, 127.78, 127.69, 127.60, 113.78, 94.01, 81.05, 78.94, 75.29, 73.30, 72.54, 71.00, 70.68, 69.06, 55.29. HRMS (ESI-TOF)  $m/z$ :  $[\text{M} + \text{COOH}]^-$  calcd for  $\text{C}_{57}\text{H}_{63}\text{O}_{15}$ , 987.4172; Found, 987.4177.

**2,3,2',3'-Tetra-*O*-benzyl-4-*O*-tert-butyldimethylsilyl-6,6'-di-*O*-(*p*-methoxybenzylidene)- $\alpha,\alpha$ -*D*-trehalose (15)**

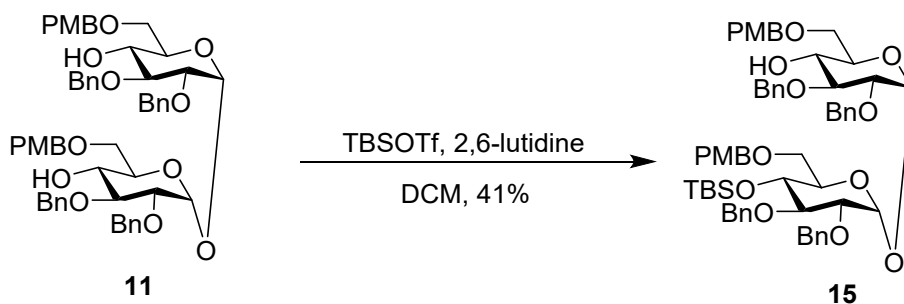

To a solution of compound **11** (270 mg, 0.29 mmol) in  $\text{CH}_2\text{Cl}_2$  (5 mL) was added 2,6-lutidine (0.15 mL, 0.95 mmol) under nitrogen atmosphere. Then, TBSOTf (0.14 mL,



0.57 mmol) was added slowly at 0 °C. The reaction mixture was stirred at rt for 30 min, and quenched by saturated NaHCO<sub>3</sub> (30 ml). The mixture was extracted with CH<sub>2</sub>Cl<sub>2</sub> (3 × 40 mL), and the organic layers were combined, dried over anhydrous Na<sub>2</sub>SO<sub>4</sub>, and concentrated in vacuo. The crude product was purified by silica gel column chromatography (PE/EA = 5:1) to afford compound **15** (123.8 mg, 41%). <sup>1</sup>H NMR (400 MHz, CDCl<sub>3</sub>) δ 7.56 – 7.09 (m, 24H), 6.84 – 6.82 (d, *J* = 6.0 Hz, 4H), 5.32 (s, 1H), 5.26 (s, 1H), 5.09 (d, *J* = 11.6 Hz), 5.02 (d, *J* = 11.2 Hz, 1H), 4.85 (d, *J* = 11.2 Hz, 1H), 4.76 - 4.75 (m, 2H), 4.63 (d, *J* = 12.0 Hz, 2H), 4.54 (d, *J* = 12.0 Hz, 1H), 4.45 – 4.32 (m, 4H), 4.10 – 4.03 (m, 2H), 3.94 (t, *J* = 9.2 Hz, 1H), 3.85 – 3.81 (m, 1H), 3.80 (s, 6H), 3.67 - 3.58 (m, 4H), 3.51 – 3.43 (m, 4H), 2.43 (s, 1H), 0.85 (s, 9H), -0.02 (s, 6H). <sup>13</sup>C NMR (100 MHz, CDCl<sub>3</sub>) δ 159.26, 159.17, 139.28, 138.90, 138.25, 138.01, 130.28, 130.12, 129.42, 129.39, 129.33, 128.55, 128.49, 128.45, 128.40, 128.36, 128.14, 128.12, 127.80, 127.64, 127.59, 127.48, 127.04, 127.00, 113.81, 113.75, 93.43, 93.20, 81.22, 80.66, 79.92, 79.44, 75.06, 74.65, 73.32, 73.07, 72.60, 72.50, 72.21, 71.05, 70.87, 70.66, 69.17, 68.69, 55.30, 55.28, 26.18, 18.23, -3.52, -4.83. HRMS (ESI-TOF) *m/z*: [M + Na]<sup>+</sup> calcd for C<sub>62</sub>H<sub>7</sub>O<sub>13</sub>NaSi, 1079.4947; Found, 1079.4951.

**2,3,2',3'-Tetra-*O*-benzyl-4-*O*-tert-butyldimethylsilyl-4'-*O*-(2-propynyl)-6,6'-di-*O*-(*p*-methoxybenzylidene)- $\alpha,\alpha$ -*D*-trehalose (**16**)**

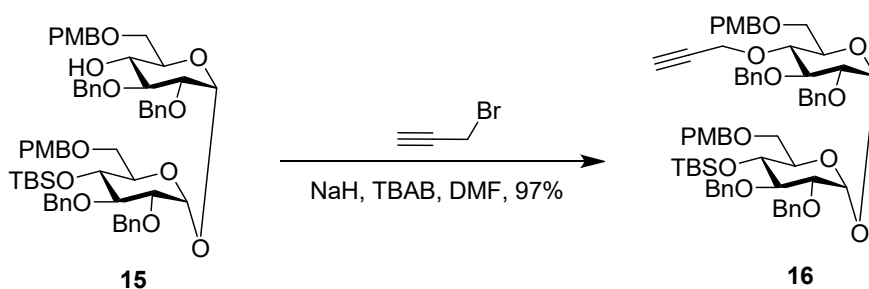

A mixture of **15** (1.0 g, 0.93 mmol) and 4 Å molecular sieves in anhydrous DMF was stirred at rt for 2 h. Then, NaH (60% in oil, 112 mg, 2.8 mmol) was added at 0 °C under nitrogen atmosphere. After reaction for 15 minutes, propargyl bromide (146 mL, 1.86 mmol) and TBAB were added and stirred at rt for 4 h. The reaction was quenched by MeOH, and diluted with CH<sub>2</sub>Cl<sub>2</sub>. Then, the mixture was washed with saturated NaHCO<sub>3</sub>, brine, and filtered. The filter cake was purified by silica gel

column chromatography using PE/EA (6:1, v/v) as eluent to give the desired product (987 mg, 97% yield). <sup>1</sup>H NMR (400 MHz, CDCl<sub>3</sub>) δ 7.40 – 7.27 (m, 20H), 7.21 – 7.18 (m, 4H), 6.84 – 6.81 (m, 4H), 5.26 (dd, *J* = 22.4 Hz, 2.8 Hz, 2H), 5.12 (d, *J* = 11.6 Hz, 1H), 4.18 (d, *J* = 11.6 Hz, 2H), 4.71 - 4.81 (m, 2H), 4.65 (d, *J* = 8.0 Hz, 1H), 4.61 (d, *J* = 8.0 Hz, 1H), 4.55 (d, *J* = 12.0 Hz, 1H), 4.50 – 4.30 (m, 5H), 4.21 – 4.02 (m, 4H), 3.80 - 3.79 (m, 7H), 3.69 (t, *J* = 9.6 Hz, 1H), 3.61 - 3.48 (m, 4H), 3.46 – 3.37 (m, 3H), 2.43 (s, 1H), 0.85 (s, 9H), 0.01 (dd, *J* = 3.2 Hz, 6H). <sup>13</sup>C NMR (100 MHz, CDCl<sub>3</sub>) δ 164.14, 164.01, 144.21, 143.64, 143.15, 142.91, 135.14, 134.97, 134.45, 134.19, 133.33, 133.31, 133.24, 133.12, 133.00, 132.58, 132.50, 132.43, 132.34, 131.90, 131.84, 118.67, 118.59, 98.57, 98.51, 86.13, 86.07, 85.10, 84.74, 84.50, 82.40, 80.41, 79.54, 79.11, 78.03, 77.89, 77.60, 77.39, 77.01, 75.67, 75.20, 73.45, 72.86, 64.94, 60.21, 60.20, 31.03, 23.09, 1.32, 0.00. HRMS (ESI-TOF) *m/z*: [M + Na]<sup>+</sup> calcd for C<sub>65</sub>H<sub>78</sub>O<sub>13</sub>NaSi, 1117.5104; Found, 1117.5107.

**2,3,2',3'-Tetra-*O*-benzyl-4-*O*-tert-butyldimethylsilyl-4'-*O*-(2-propyny)- $\alpha,\alpha$ -D-trehalose (17)**

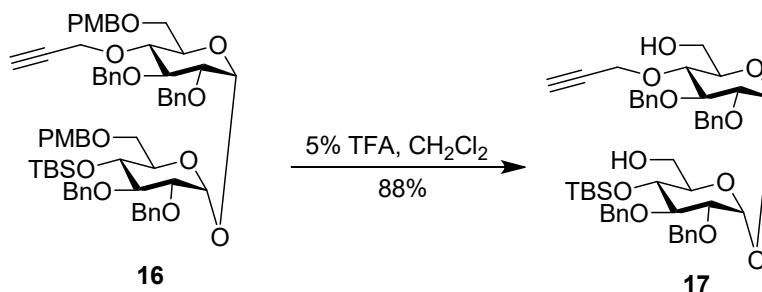

Compound **16** (1.0 g, 0.91 mmol) was dissolved in CH<sub>2</sub>Cl<sub>2</sub> with 5% TFA (5 mL) at 0 °C, and stirred for 1 h at rt. The reaction was quenched by saturated NaHCO<sub>3</sub>, and diluted with EA. Then, the organic layer was washed with brine, dried over anhydrous Na<sub>2</sub>SO<sub>4</sub> and concentrated in vacuum. The residue was purified by silica gel column chromatography using PE/EA (2:1, v/v) as eluent to give the desired product (684 mg, 88% yield). <sup>1</sup>H NMR (400 MHz, CDCl<sub>3</sub>) δ 7.32 – 7.12 (m, 20H), 5.19 (d, *J* = 2.8 Hz, 1H), 5.14 (d, *J* = 2.8 Hz, 2H), 5.16 (d, *J* = 11.6 Hz, 1H), 5.00 (d, *J* = 11.6 Hz, 1H), 4.87 (d, *J* = 10.8 Hz, 1H), 4.78 (d, *J* = 10.8 Hz, 1H), 4.73 – 4.66 (m, 2H), 4.63 – 4.57 (m, 2H), 4.43 – 4.39 (m, 2H), 4.07 (t, *J* = 9.2 Hz, 1H), 4.01 – 3.87 (m, 2H), 3.83 -

3.76 (m, 1H), 3.71 - 3.47 (m, 8H), 2.47 (s, 1H), 0.87 (s, 9H), 0.01 (d,  $J = 24.0$  Hz, 6H).  $^{13}\text{C}$  NMR (100 MHz,  $\text{CDCl}_3$ )  $\delta$  139.09, 138.53, 137.97, 137.86, 128.52, 128.48, 128.46, 128.17, 128.15, 127.79, 127.77, 127.63, 127.43, 127.08, 93.55, 81.16, 81.08, 80.32, 79.97, 79.85, 76.72, 75.52, 74.91, 74.54, 73.13, 72.93, 72.85, 71.13, 70.38, 61.38, 59.97, 26.08, 18.17, -3.66, -4.88. HRMS (ESI-TOF)  $m/z$ :  $[\text{M} + \text{COOH}]^-$  calcd for  $\text{C}_{49}\text{H}_{63}\text{O}_{13}\text{Si}$ , 899.4043; Found, 899.4034.

### Compound 18

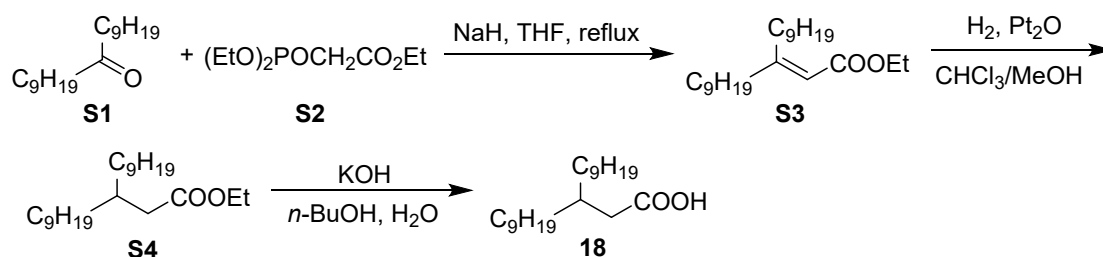

The synthesis of compound **18** was according to published procedure.<sup>2</sup> Some typical experimental details are as follows.

a) The synthesis of compound **S3**. To a solution of compound **S2** and NaH in anhydrous THF was stirred at 0 °C for 30 min. Then compound **S1** was added, and reacted at 70 °C for 18 h. Afterwards, the reaction was quenched by  $\text{H}_2\text{O}$ , and extracted with DCM. The organic layers was combined, dried over anhydrous  $\text{Na}_2\text{SO}_4$  and concentrated in vacuum. The residue was purified by silica gel column chromatography using PE/DCM (3:1, v/v) as eluent to give the desired product.  $^1\text{H}$  NMR (400 MHz,  $\text{CDCl}_3$ )  $\delta$  5.61 (s, 1H), 4.14 (q,  $J = 7.2$  Hz, 2H), 2.58 (t,  $J = 8.1$  Hz, 2H), 2.12 (t,  $J = 7.8$  Hz, 2H), 1.44 (m, 4H), 1.27 (s, 27H), 0.88 (t,  $J = 6.9$  Hz, 6H).

b) The synthesis of compound **S4**. To a solution of compound **S3** and  $\text{PtO}_2$  in  $\text{CHCl}_3/\text{MeOH}$  (5:1) was stirred at rt under  $\text{H}_2$  atmosphere for 23 h. Then the reaction mixture was diluted with DCM, filtrated, and the organic layers were concentrated in vacuum. The residue was purified by silica gel column chromatography using PE/DCM (6:1, v/v) as eluent to give the desired product. Colourless oil, yield: 92%.  $^1\text{H}$  NMR (400 MHz,  $\text{CDCl}_3$ )  $\delta$  4.12 (q,  $J = 7.2$  Hz, 2H), 2.21 (d,  $J = 6.6$  Hz, 2H), 1.86 – 1.82 (m, 1H), 1.27 – 1.26 (m, 35H), 0.88 (t,  $J = 6.6$  Hz, 6H).

c) The synthesis of compound **18**. To a solution of compound S4 (795 mg, 2.25 mmol), KOH (1.26g, 22.5 mmol) in *n*-BuOH/H<sub>2</sub>O (2:1) was stirred at 100 °C for 6 h. Then, the reaction was quenched by 1 N HCl, and extracted with EA. The organic layer was dried over anhydrous Na<sub>2</sub>SO<sub>4</sub>, and concentrated in vacuum. The residue was purified by silica gel column chromatography using PE/DCM (3:1, v/v) as eluent to give the desired product. <sup>1</sup>H NMR (400 MHz, CDCl<sub>3</sub>) δ 2.27 (d, *J* = 6.9 Hz, 2H), 1.84 (s, 1H), 1.26 (s, 33H), 0.88 (t, *J* = 6.8 Hz, 6H).

**2,3,2',3'-Tetra-*O*-benzyl-4-*O*-tert-butyldimethylsilyl-4'-*O*-(2-propynyl)-6,6'-Bis-*O*-(3-nonyldodecanoyl)- $\alpha,\alpha'$ -trehalose (**7**)**

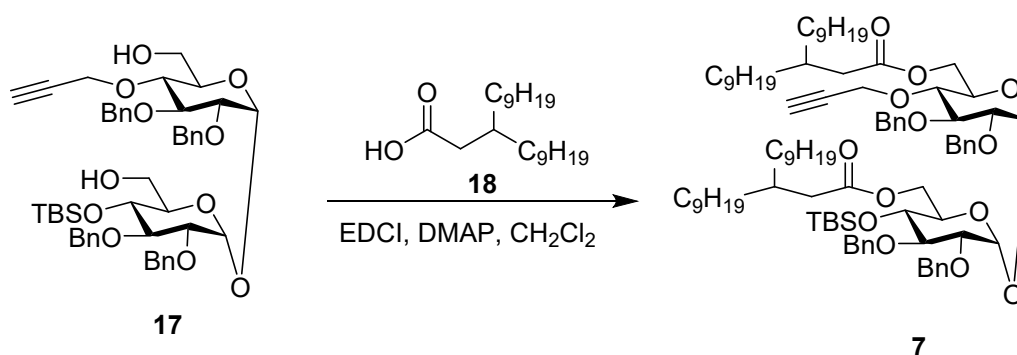

EDCI (731 mg, 2.46 mmol) was added to a mixture of **17** (427 mg, 0.5 mmol), **18** (447 mg, 1.37 mmol) and DMAP (6.1 mg, 0.05 mmol) in anhydrous DCM (5 mL) at 0 °C. Then, the mixture was stirred for 12 h at 50 °C. The resulting solution was diluted with DCM, washed with saturated NaHCO<sub>3</sub>. The organic layer was dried over anhydrous Na<sub>2</sub>SO<sub>4</sub> and concentrated in vacuum. The crud product was purified by silica gel column chromatography using PE/EA (10:1, v/v) as eluent to give the desired product **7** (647 mg, 88% yield). <sup>1</sup>H NMR (400 MHz, CDCl<sub>3</sub>) δ 7.37 – 7.18 (m, 20H), 5.22 (s, 1H), 5.17 (s, 1H), 5.08 (d, *J* = 11.6 Hz, 1H), 4.98 (d, *J* = 11.6 Hz, 1H), 4.87 (d, *J* = 10.4 Hz 1H), 4.77 - 4.63 (m, 4H), 4.56 (d, *J* = 11.6 Hz, 1H), 4.44 (d, *J* = 11.6 Hz, 1H), 4.42 (d, *J* = 15.2 Hz, 1H), 4.30 (d, *J* = 15.2 Hz, 1H), 4.18 - 4.04 (m, 6H), 3.89 (dd, *J* = 12.0 Hz, 3.6 Hz, 1H), 3.79 (t, *J* = 8.8 Hz, 1H), 3.63 (t, *J* = 9.6 Hz, 1H), 3.54 (t, *J* = 8.8 Hz, 2H), 3.46 (t, *J* = 9.2 Hz, 1H), 2.44 (s, 1H), 2.17 (d, *J* = 6.0 Hz, 4H), 1.78 (s, 2H), 1.24 (s, 64H), 0.89 - 0.85 (m, 21H), 0.00 (s, 6H). <sup>13</sup>C NMR (100 MHz, CDCl<sub>3</sub>) δ 173.25, 173.23, 139.03, 138.41, 137.76, 137.60, 128.55, 128.46, 128.19,

128.10, 127.85, 127.81, 127.78, 127.59, 127.34, 127.03, 127.01, 93.31, 81.06, 80.87, 79.98, 79.80, 79.72, 75.57, 74.76, 74.61, 73.10, 72.75, 70.64, 70.60, 68.81, 62.65, 60.42, 60.08, 39.08, 38.98, 34.87, 34.74, 33.79, 33.71, 33.67, 31.93, 29.95, 29.68, 29.65, 29.38, 26.56, 26.54, 26.51, 26.03, 22.71, 18.14, 14.14, -3.64, -4.99. HRMS (ESI-TOF)  $m/z$ :  $[M + Na]^+$  calcd for  $C_{91}H_{142}O_{13}NaSi$ , 1494.0112; Found, 1494.0111.

**2,3,2',3'-Tetra-*O*-benzyl-4-*O*-tert-butyldimethylsilyl-4'-*O*-(2-propyny)-6,6'-Bis-*O*-(1-docosylmethyl)- $\alpha,\alpha'$ -trehalose (8)**

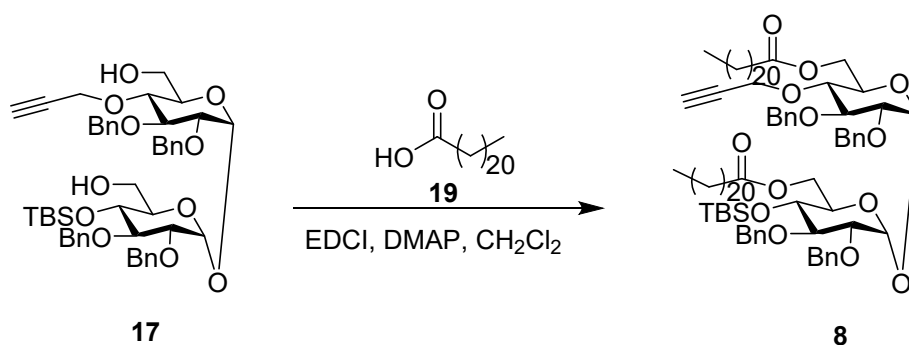

The synthesis of compound **8** was similar to **7** just using compound **19** instead of **18** (667 mg, 89%).  $^1H$  NMR (400 MHz,  $CDCl_3$ )  $\delta$  7.36 – 7.21 (m, 20H), 5.20 (d,  $J = 12.0$  Hz, 2H), 5.09 (d,  $J = 11.6$  Hz, 1H), 4.99 (d,  $J = 11.6$  Hz, 1H), 4.87 (d,  $J = 10.4$  Hz, 1H), 4.75 - 4.56 (m, 5H), 4.44 - 4.20 (m, 2H), 4.10 – 4.06 (m, 6H), 3.93 - 3.76 (m, 2H), 3.66 - 3.45 (m, 4H), 2.43 (d,  $J = 4.0$  Hz, 1H), 2.24 – 2.22 (m, 4H), 1.62 (s, 4H), 1.25(m, 72H), 0.88 - 0.85 (m, 15H), -0.07 (s, 6H).  $^{13}C$  NMR (100 MHz,  $CDCl_3$ )  $\delta$  173.52, 173.47, 138.99, 138.37, 137.75, 137.61, 128.57, 128.47, 128.20, 128.11, 127.87, 127.82, 127.81, 127.58, 127.32, 127.03, 93.38, 81.10, 80.89, 79.89, 79.73, 75.58, 74.80, 74.59, 73.09, 72.74, 70.60, 70.57, 68.82, 62.79, 60.04, 34.15, 34.11, 31.94, 29.72, 29.68, 29.65, 29.50, 29.38, 29.29, 29.18, 29.15, 26.01, 24.87, 24.79, 22.71, 18.13, 14.14, 1.03, -3.62, -5.02. HRMS (ESI-TOF)  $m/z$ :  $[M + Na]^+$  calcd for  $C_{93}H_{146}NaO_{13}Si$ , 1522.0425; Found, 1522.0420.

**2,3,2',3'-Tetra-*O*-benzyl-4'-*O*-(2-propyny)-6,6'-Bis-*O*-(3-nonyldodecanoyl)- $\alpha,\alpha'$ -trehalose (20)**

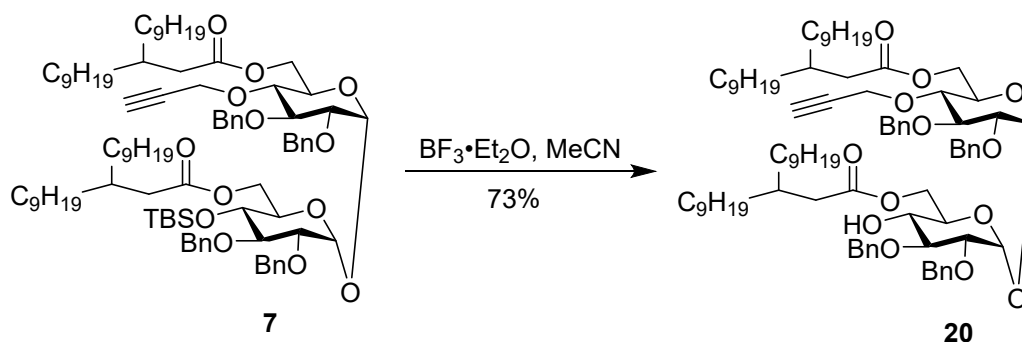

To a solution of compound **7** (1.0 g, 0.93 mmol) in anhydrous acetonitrile was added  $\text{BF}_3 \cdot \text{Et}_2\text{O}$  (1.1 eq) with a drop wise manner at 0 °C. After stirring for 2 h, the reaction was quenched by saturated  $\text{NaHCO}_3$ , and diluted with  $\text{CH}_2\text{Cl}_2$ . The organic layer was dried over anhydrous  $\text{Na}_2\text{SO}_4$  and concentrated in vacuum. The crud product was purified by silica gel column chromatography using PE/EA (5:1, v/v) as eluent to give the desired product (921 mg, 73% yield).  $^1\text{H}$  NMR (400 MHz,  $\text{CDCl}_3$ )  $\delta$  7.36 – 7.30 (m, 20H), 5.17 (d,  $J = 3.6$  Hz, 2H), 5.01 - 4.97 (m, 2H), 4.87 - 4.83 (m, 2H), 4.75 - 4.56 (m, 4H), 4.45 - 4.41 (m, 1H), 4.32 - 4.28 (m, 2H), 4.23 - 4.11 (m, 4H), 4.02 (t,  $J = 16.0$  Hz, 2H), 3.89 - 3.85 (m, 2H), 3.54 - 3.40 (m, 4H), 2.45 (s, 1H), 2.21 - 2.18 (m, 4H), 1.80 (m, 2H), 1.25 (s, 64H), 0.88 (t,  $J = 4.0$  Hz, 12H).  $^{13}\text{C}$  NMR (100 MHz,  $\text{CDCl}_3$ )  $\delta$  174.23, 173.27, 138.66, 138.39, 137.75, 137.73, 128.55, 128.50, 128.10, 128.05, 127.93, 127.83, 127.80, 127.61, 127.45, 94.37, 94.04, 81.40, 80.61, 79.68, 79.40, 78.91, 75.76, 75.53, 74.66, 73.03, 72.87, 70.16, 69.92, 68.93, 62.59, 60.14, 39.10, 39.04, 34.94, 34.88, 33.77, 33.71, 31.93, 29.94, 29.67, 29.65, 29.38, 26.57, 26.52, 22.71, 14.15. HRMS (ESI-TOF)  $m/z$ :  $[\text{M} + \text{H}]^+$  calcd for  $\text{C}_{85}\text{H}_{128}\text{NaO}_{13}$ , 1379.9247; Found, 1379.9206.

**2,3,2',3'-Tetra-*O*-benzyl-4'-*O*-(2-propyny)-6,6'-Bis-*O*-(1-docosylmethyl)- $\alpha,\alpha'$ -trehalose (**21**)**

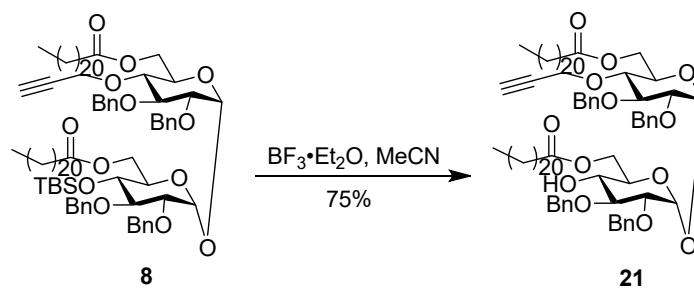

The synthesis of compound **21** was similar to **20** just using compound **8** instead of **7**

(966 mg, 75%).  $^1\text{H NMR}$  (400 MHz,  $\text{CDCl}_3$ )  $\delta$  7.36 – 7.21 (m, 20H), 5.17 (d,  $J = 3.6$  Hz, 2H), 5.01 - 4.97 (m, 2H), 4.87 – 4.83 (m, 2H), 4.73 - 4.66 (m, 4H), 4.43 (dd,  $J = 12.0, 2.4$  Hz, 1H), 4.34 - 4.28 (m, 2H), 4.23 - 4.11 (m, 4H), 4.02 (t,  $J = 8.0$  Hz, 1H), 3.90 - 3.85 (m, 2H), 3.56 - 3.40 (m, 4H), 2.43 (t,  $J = 2.4$  Hz, 1H), 2.29 - 2.24 (m, 4H), 1.58 - 1.56 (m, 4H), 1.25 - 1.2 (m, 72H), 0.88 (t,  $J = 4.0$  Hz, 6H). HRMS (ESI-TOF)  $m/z$ :  $[\text{M} + \text{Na}]^+$  calcd for  $\text{C}_{87}\text{H}_{132}\text{O}_{13}$ , 1407.9578; Found, 1407.9567.

**2,3,2',3'-Tetra-*O*-benzyl-4'-*O*-propyl-6,6'-Bis-*O*-(1-docosylmethyl)- $\alpha,\alpha'$ -trehalose (S14) used as the capture reagent (S5)**

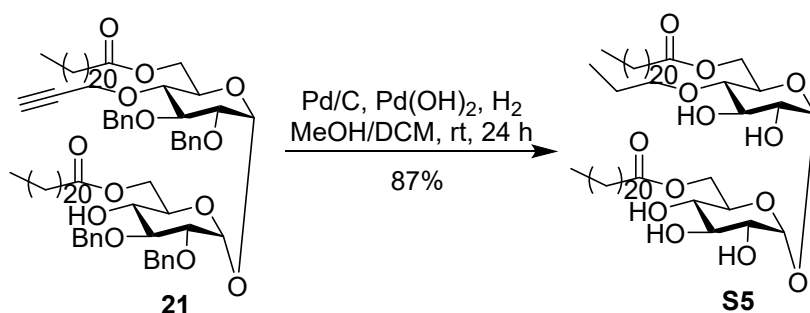

To a solution of compound **21** (20 mg) in MeOH and DCM was added Pd/C (10.5 mg) and Pd(OH)<sub>2</sub> (11 mg). The mixture was stirred at rt for 24 h under hydrogen atmosphere. Afterwards, the mixture was filtrated through a celite pad, and the filtrate was concentrated in vacuum to give the desired product.  $^1\text{H NMR}$  (400 MHz, MeOH- $d_4$ )  $\delta$  5.09 (dd,  $J = 3.7, 1.4$  Hz, 2H), 4.38 – 4.24 (m, 4H), 3.97 – 3.75 (m, 2H), 3.91 – 3.81 (m, 2H), 3.78 – 3.74 (m, 1H), 3.59 – 3.45 (m, 3H), 3.36 (q,  $J = 1.6$  Hz, 2H), 3.29 – 3.14 (m, 1H), 2.35 (td,  $J = 7.6, 4.8$  Hz, 4H), 1.60 (dq,  $J = 17.4, 7.0$  Hz, 6H), 1.27 (s, 76H), 0.90 (dt,  $J = 9.2, 7.1$  Hz, 9H).

**Compound 23**

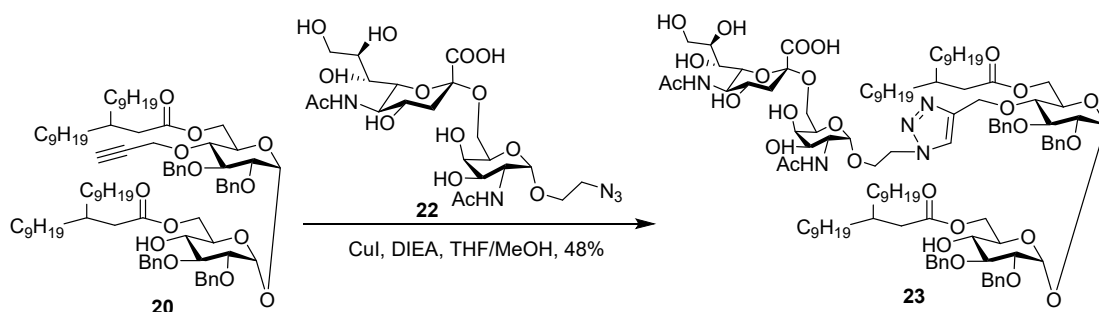

To a mixture of **20** (40 mg, 29  $\mu\text{mol}$ ), **22** (17.9 mg, 30.8  $\mu\text{mol}$ ), and CuI (53.3 mg, 0.28 mmol) in THF (2 mL) and MeOH (2 mL) was added DIEA (50  $\mu\text{L}$ , 0.28 mmol).

The reaction was stirred at rt for 24 h, filtrated and concentrated. The residue was purified by silica gel column chromatography using MeOH/DCM (1 : 20, v/v) as eluent to give the desired product as a white solid (27.4 mg, 48%). <sup>1</sup>H NMR (600 MHz, CD<sub>3</sub>OD/CDCl<sub>3</sub>) δ 7.55 (s, 1H), 7.40 - 7.24 (m, 20H), 5.21 - 3.44 (m, 37H, 8H of Ar-CH<sub>2</sub>, 29H of sugar and linker), 2.76 - 2.72 (m, 1H), 2.1 (s, 4H), 2.05 (m, 6H, -NHAc), 1.84 - 1.77 (m, 4H), 1.62 - 1.58 (m, 1H), 1.46 - 1.43 (m, 4H), 1.26 (s, 64H, CH<sub>2</sub> of lipid), 0.89 (t, *J* = 9.6 Hz, 12H, CH<sub>3</sub> of lipid). <sup>13</sup>C NMR (150 MHz, CD<sub>3</sub>OD/CDCl<sub>3</sub>) δ 180.70, 178.54, 178.11, 177.62, 177.53, 177.17, 148.97, 142.50, 142.43, 141.72, 141.35, 132.40, 132.30, 132.28, 131.89, 131.83, 131.59, 131.48, 131.44, 103.97, 101.67, 97.75, 97.67, 97.38, 97.31, 85.06, 84.96, 83.40, 82.73, 81.91, 79.36, 77.05, 76.83, 74.19, 74.07, 72.98, 72.68, 72.39, 71.63, 70.74, 70.23, 69.95, 69.87, 68.52, 66.92, 66.29, 64.33, 58.25, 57.96, 56.59, 46.25, 46.18, 43.01, 42.94, 38.87, 38.79, 37.56, 35.75, 33.76, 33.48, 33.19, 30.32, 27.08, 26.51, 26.01, 22.19, 20.86, 17.86, 15.95, 14.78, 14.75. HRMS (ESI-TOF) *m/z*: [M + H]<sup>+</sup> calcd for C<sub>106</sub>H<sub>164</sub>N<sub>5</sub>O<sub>27</sub>, 1939.1608; Found, 1939.1629.

### Compound 24

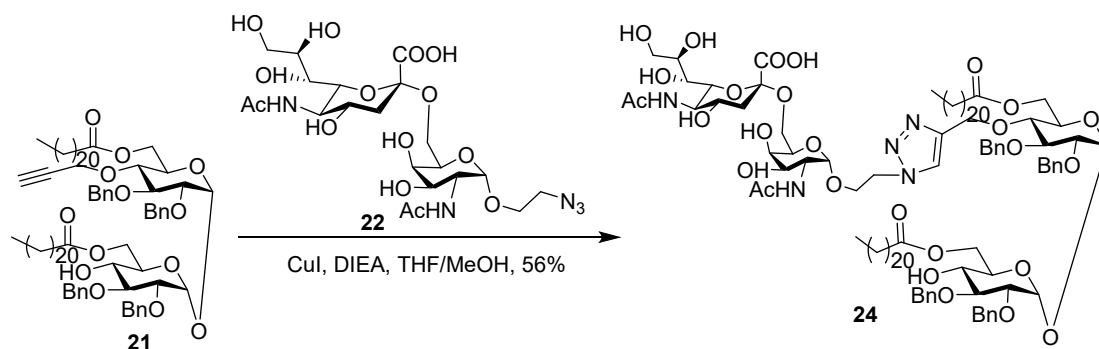

The synthesis of compound **24** was similar to **23** just using compound **21** instead of **20**. White solid, yield: 56%. <sup>1</sup>H NMR (600 MHz, CD<sub>3</sub>OD/CDCl<sub>3</sub>) δ 7.65 (s, 1H), 7.38 - 7.28 (m, 20H), 5.22 - 3.43 (m, 42H, 8H of Ar-CH<sub>2</sub>, 34H of sugar and linker), 2.76 - 2.72 (m, 1H), 2.1 (s, 4H), 2.08 - 1.98 (m, 6H, -NHAc), 1.80 - 1.62 (m, 2H), 1.60 - 1.50 (m, 4H), 1.26 (s, 72H, CH<sub>2</sub> of lipid), 0.89 (t, *J* = 9.6 Hz, 6H, CH<sub>3</sub> of lipid). <sup>13</sup>C NMR (150 MHz, CD<sub>3</sub>OD/CDCl<sub>3</sub>) δ 176.83, 174.67, 174.47, 173.96, 173.92, 173.91, 173.90, 173.87, 138.58, 137.84, 137.50, 128.54, 128.44, 128.03, 127.76, 100.11,



97.84, 93.95, 93.60, 81.22, 81.10, 79.40, 78.78, 78.71, 77.98, 75.54, 75.49, 75.33, 74.89, 73.16, 72.91, 70.32, 70.12, 69.12, 66.01, 63.08, 62.54, 54.03, 42.28, 39.82, 34.13, 31.90, 29.67, 29.51, 29.44, 29.33, 29.24, 29.12, 24.88, 24.81, 23.22, 22.65, 14.00, 10.89. HRMS (ESI-TOF)  $m/z$ :  $[M + H]^+$  calcd for  $C_{108}H_{168}N_5O_{27}$ , 1967.1921; Found, 1967.1908.

### Compound 1

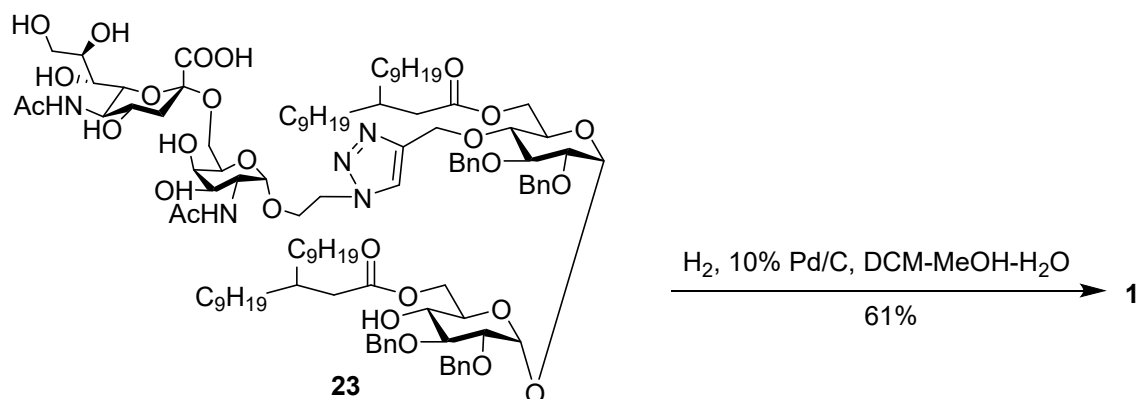

A mixture of **23** (30 mg, 15.5  $\mu\text{mol}$ ) and 10% Pd/C (30 mg) in DCM/MeOH/  $\text{H}_2\text{O}$  (3:3:0.1, 20 mL) was stirred under hydrogen atmosphere at rt for 24 h. Then, the reaction mixture was diluted and filtrated through a celite pad. The filtrate was washed with water, and the organic layer was concentrated in vacuum to give **1** as a white solid (14.9 mg, 61% yield).  $^1\text{H}$  NMR (600 MHz,  $\text{CD}_3\text{OD}/\text{CDCl}_3$ )  $\delta$  8.12 (s, 1H), 5.10 - 2.67 (m, 27H, 27H of sugar and linker), 2.32 - 2.28 (m, 4H), 2.32 - 2.28 (m, 4H), 2.05 (s, 6H, -NHAc), 1.85 (s, 2H), 1.63 - 1.60 (m, 1H), 1.46 - 1.40 (m, 4H), 1.26 (s, 64H,  $\text{CH}_2$  of lipid), 0.89 (t,  $J = 9.6$  Hz, 12H,  $\text{CH}_3$  of lipid). HRMS (ESI-TOF)  $m/z$ :  $[M + H]^+$  calcd for  $C_{78}H_{140}N_5O_{27}$ , 1578.9730; Found, 1578.9726.

### Compound 2

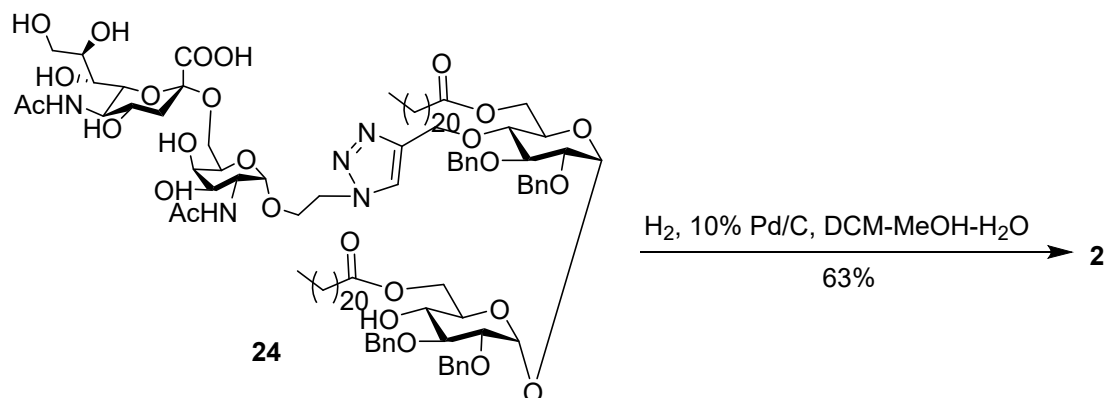

The synthesis of compound **2** was similar to **1** just using compound **24** instead of **23**. White solid, yield: 63%. <sup>1</sup>H NMR (600 MHz, CD<sub>3</sub>OD/CDCl<sub>3</sub>) δ 8.12 (s, 1H), 5.11 - 3.43 (m, 35H, 35H of sugar and linker), 2.72 - 2.70 (m, 1H), 2.41 - 2.38 (m, 4H), 2.07 (s, 6H, -NHAc), 1.80 - 1.78 (m, 1H), 1.60 - 1.62 (m, 4H), 1.26 (s, 72H, CH<sub>2</sub> of lipid), 0.89 (t, *J* = 9.6 Hz, 6H, CH<sub>3</sub> of lipid). HRMS (ESI-TOF) *m/z*: [M + H]<sup>+</sup> calcd for C<sub>80</sub>H<sub>144</sub>N<sub>5</sub>O<sub>27</sub>, 1607.0043; Found, 1607.0044.

### III. Preparation and Characterization of STn

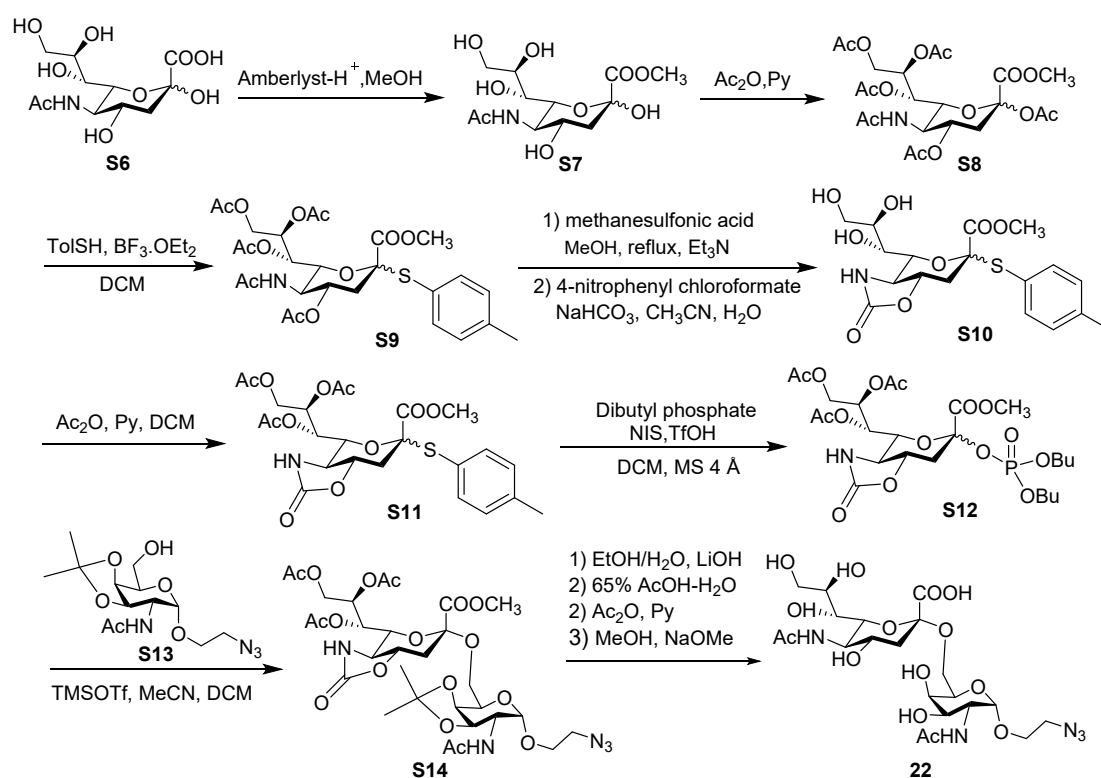

The synthesis of STn was similar to the published processes.<sup>3,4</sup> Some typical experimental details are as follows.

a) The synthesis of compound **S10**. To a solution of compound **S9** (5.51 g) in MeOH was added PTSA and stirred at 0 °C for 15 min. Afterwards, the mixture was reacted at 90 °C for 4 h. The reaction was quenched by Et<sub>3</sub>N, and the mixture was concentrated in vacuum. Then, to a solution of above product, NaHCO<sub>3</sub> in MeCN/H<sub>2</sub>O was added *p*-nitrophenyl chloroformate, and stirred for 3 h. The reaction mixture was diluted with EA, and washed with H<sub>2</sub>O. The organic layer was dried over

anhydrous Na<sub>2</sub>SO<sub>4</sub> and concentrated in vacuum. The crude product was purified by silica gel column chromatography using DCM/MeOH (40:1, v/v) as eluent to give the desired product. Yellow solid, yield: 55.2%. <sup>1</sup>H NMR (400 MHz, CDCl<sub>3</sub>) δ 7.47 (d, *J* = 9.2 Hz, 2H), 7.18 (d, *J* = 9.2 Hz, 2H), 4.66 – 4.63 (m, 2H), 3.86 – 3.82 (m, 1H), 3.75 – 3.71 (m, 2H), 3.61 – 3.57 (m, 2H), 2.39 (t, *J* = 12 Hz, 1H), 2.37 – 2.33 (m, 3H).

b) The synthesis of compound **S11**. To a mixture of compound S10 (2.1 g) in anhydrous pyridine was added Ac<sub>2</sub>O at 0 °C. After stirring at rt for 5 h, the mixture was concentrated. The crude product was purified by silica gel column chromatography using PE/EA/AcOH (2:1:0.01, v/v) as eluent to give the desired product. White solid, yield: 86%. <sup>1</sup>H NMR (400 MHz, CDCl<sub>3</sub>) δ 7.29 (d, *J* = 8.0 Hz, 2H), 7.16 (d, *J* = 8.0 Hz, 2H), 5.50 (s, 1H), 5.23 – 5.17 (m, 2H), 4.71 (td, *J* = 12.4, 3.6 Hz, 1H), 4.59 (dd, *J* = 9.6, 2.4 Hz, 1H), 4.42 (dd, *J* = 12.8, 2.4 Hz, 1H), 4.027 – 4.22 (m, 1H), 3.63 (s, 3H), 3.10 (t, *J* = 11.2 Hz, 1H), 2.81 (dd, *J* = 12.8, 4.0 Hz, 1H), 2.36 (s, 3H), 2.25 (t, *J* = 12.8 Hz, 1H), 2.16 (s, 3H), 2.10 (s, 3H).

c) The synthesis of compound **S12**. A mixture of S11, dibutyl phosphate and 4 Å MS in anhydrous DCM was stirred at rt under N<sub>2</sub> atmosphere for 2 h. Then, NIS and TfOH were added under 0 °C, and stirred for 6h. The reaction mixture was diluted with DCM, washed with saturated NaHCO<sub>3</sub>. The organic layer was dried over anhydrous Na<sub>2</sub>SO<sub>4</sub> and concentrated in vacuum. The crude product was purified by silica gel column chromatography using PE/EA (5:1, v/v) as eluent to give the desired product. White solid, yield: 66%. <sup>1</sup>H NMR (400 MHz, CDCl<sub>3</sub>) δ 5.40 – 5.34 (m, 2H), 5.12 (d, *J* = 10.0 Hz, 1H), 4.46 (d, *J* = 9.2 Hz, 1H), 4.36 (d, *J* = 12.8 Hz, 1H), 4.29 (d, *J* = 12.8 Hz, 1H), 4.14 – 4.05 (m, 6H), 3.83 (d, *J* = 8.8 Hz, 3H), 3.23 (t, *J* = 10.4 Hz, 1H), 2.92 (d, *J* = 11.6 Hz, 1H), 2.65 (t, *J* = 12.8 Hz, 1H), 2.19 (s, 3H), 2.15 (s, 3H), 2.10 (s, 1H), 2.06 (s, 3H), 1.72 – 1.62 (m, 8H), 1.44 – 1.39 (m, 5H), 0.95 (t, *J* = 7.2 Hz, 6H).

d) Compound **S13** was synthesized according to the reported procedures.<sup>4</sup>

e) The synthesis of intermediate **S14**. A mixture of compound **S12** (1.0 g, 1.6 mmol), **S13** (0.44g, 1.3 mmol) and 4 Å MS in DCM/MeCN (20 mL, v/v = 2:1) was stirred 2 h

under N<sub>2</sub> atmosphere. Then, trimethylsilyl trifluoromethanesulfonate (0.31 g, 0.14 mmol) was added at -40 °C, and reacted for 2 h. After the reaction was accomplished, Et<sub>3</sub>N was added to quench the reaction. The organic layer was concentrated in vacuum, and the crud product was purified by silica gel column chromatography using PE/EA as eluent to give the desired product. White solid, yield: 66%. <sup>1</sup>H NMR (400 MHz, CDCl<sub>3</sub>) δ 5.74 (d, *J* = 9.4 Hz, 1H), 5.51 – 5.42 (m, 1H), 5.14 (dd, *J* = 9.6, 1.7 Hz, 1H), 4.82 (d, *J* = 3.3 Hz, 1H), 4.35 – 4.22 (m, 2H), 4.18 (dd, *J* = 4.8, 2.4 Hz, 1H), 4.08 (dt, *J* = 11.7, 4.5 Hz, 1H), 4.02 – 3.94 (m, 1H), 3.90 (dd, *J* = 9.8, 6.4 Hz, 1H), 3.81 (s, 2H), 3.64 (ddd, *J* = 10.3, 7.5, 5.0 Hz, 1H), 3.40 (dd, *J* = 7.2, 4.2 Hz, 1H), 3.09 (t, *J* = 10.5 Hz, 1H), 2.91 (dt, *J* = 7.4, 3.7 Hz, 1H), 2.20 (s, 2H), 2.18 (s, 2H), 2.12 (s, 1H), 2.06 (d, *J* = 4.7 Hz, 2H), 2.02 (s, 2H), 1.56 (s, 2H), 1.35 (s, 2H).

f) The synthesis of compound **22**. To a solution of compound S14 in EtOH/H<sub>2</sub>O (1:1) was added LiOH under N<sub>2</sub> atmosphere. Then, it reacted at 80 °C for 48 h, and 10% HCl was added. The reaction mixture was concentrated in vacuum, and the residue was dissolve in 65% AcOH/H<sub>2</sub>O. The mixture was stirred at 65 °C for 3 h, and concentrated in vacuum again. The residue was dissolved in pyridine, and acetic anhydride was added at 0 °C. After the mixture was stirred for 6 h, pyridine was removed and excess amounts of EA and saturated sodium bicarbonate solution was added. The organic layer was concentrated in vacuum. The residue was dissolved in MeOH, and MeONa was added until the pH is 10~11. The solution was stirred at rt for 6 h, and concentrated in vacuum. The crud product was purified by gel column chromatography. Yield: 67%. <sup>1</sup>H NMR (400 MHz, D<sub>2</sub>O) δ 4.86 (d, *J* = 3.7 Hz, 1H), 4.07 (dd, *J* = 11.0, 3.7 Hz, 1H), 4.01 – 3.90 (m, 1H), 3.88 – 3.70 (m, 3H), 3.65 – 3.40 (m, 4H), 2.64 (dd, *J* = 12.4, 4.6 Hz, 1H), 1.95 (d, *J* = 3.2 Hz, 3H), 1.59 (t, *J* = 12.1 Hz, 1H). <sup>13</sup>C NMR (100 MHz, D<sub>2</sub>O) δ 174.99, 174.64, 173.32, 100.38, 97.08, 72.54, 71.73, 69.56, 68.43, 68.22, 68.18, 67.36, 66.70, 63.75, 62.60, 51.81, 50.20, 49.76, 40.20, 22.01, 21.99.

## IV. Preparation and Characterization of Conjugates 3 and 4

### 2,3,2',3'-Tetra-*O*-benzyl-4,4'-di-*O*-(2-propynyl)-6,6'-di-*O*-(*p*-methoxybenzylidene)- $\alpha,\alpha'$ -*D*-trehalose (**25**)

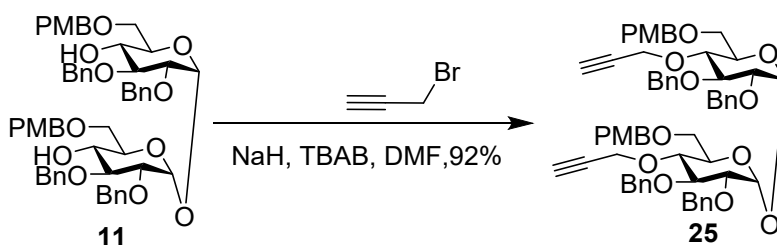

A mixture of **11** (1.0 g, 1.06 mmol) and 4 Å molecular sieves in anhydrous DMF was stirred at rt for 2 h. Then, NaH (60% in oil, 0.2 g, 5.3 mmol) was added at 0 °C under nitrogen atmosphere. After reaction for 15 minutes, propargyl bromide (0.5 mL, 6.36 mmol) and TBAB (0.7g, 2.12 mmol) were added and stirred at rt for 6 h. The reaction was quenched by MeOH, and diluted with CH<sub>2</sub>Cl<sub>2</sub>. Then, the mixture was washed with saturated NaHCO<sub>3</sub>, brine, and filtered. The filter cake was purified by silica gel column chromatography using PE/EA (4:1, v/v) as eluent to give the desired product (1.08 g, 92% yield). <sup>1</sup>H NMR (400 MHz, CDCl<sub>3</sub>)  $\delta$  7.40 – 7.27 (m, 20H), 7.19 (d, *J* = 8.4 Hz, 4H), 6.83 (d, *J* = 8.4 Hz, 4H), 5.15 (d, *J* = 3.6 Hz, 2H), 4.98-4.94 (m, 2H), 4.85 (d, *J* = 8.0 Hz, 2H), 4.67 – 4.61 (m, 4H), 4.48–4.45 (d, *J* = 11.6 Hz, 4H), 4.39–4.33 (m, 4H), 4.16–4.11 (m, 2H), 3.98–3.96 (t, *J* = 9.2 Hz, 2H), 3.79 (s, 6H), 3.53-3.48 (m, 6H), 3.40 – 3.37 (m, 2H), 2.41 (t, *J* = 2.4 Hz, 2H). <sup>13</sup>C NMR (100 MHz, CDCl<sub>3</sub>)  $\delta$  159.22, 138.73, 138.11, 130.00, 129.53, 128.42, 128.36, 128.10, 127.63, 127.58, 127.52, 113.74, 94.62, 81.53, 80.13, 79.11, 77.49, 75.68, 74.19, 73.09, 72.68, 70.34, 67.86, 60.06, 55.28. HRMS (ESI-TOF) *m/z*: [M + Na]<sup>+</sup> calcd for C<sub>62</sub>H<sub>66</sub>NaO<sub>13</sub>, 1041.4396; Found, 1041.4395.

### 2,3,2',3'-Tetra-*O*-benzyl-4,4'-di-*O*-(2-propynyl)- $\alpha,\alpha'$ -*D*-trehalose (**26**)

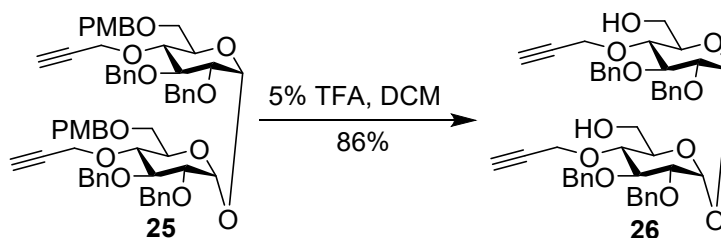

Compound **25** (1.5 g, 1.5 mmol) was dissolved in CH<sub>2</sub>Cl<sub>2</sub> with 5% TFA (8 mL) at 0 °C, and stirred for 1 h at rt. The reaction was quenched by saturated NaHCO<sub>3</sub>, and diluted with EA. Then, the organic layer was washed with brine, dried over anhydrous Na<sub>2</sub>SO<sub>4</sub> and concentrated in vacuum. The residue was purified by silica gel column chromatography using PE/EA (2:1, v/v) as eluent to give the desired product (986 mg, 86% yield). <sup>1</sup>H NMR (400 MHz, CDCl<sub>3</sub>) δ 7.39 – 7.25 (m, 20H), 5.11 (d, *J* = 3.6 Hz, 2H), 4.99 (d, *J* = 10.8 Hz, 2H), 4.85 (d, *J* = 10.8 Hz, 2H), 4.72 - 4.65 (m, 4H), 4.46 – 4.37 (m, 4H), 4.04 – 4.00 (m, 4H), 3.72 – 3.60 (m, 4H), 3.54 - 3.49 (m, 4H), 2.48 (t, *J* = 2.0 Hz, 2H). <sup>13</sup>C NMR (100 MHz, CDCl<sub>3</sub>) δ 138.56, 137.92, 128.50, 128.48, 128.04, 127.83, 127.74, 127.60, 94.20, 81.47, 80.30, 79.38, 76.69, 75.66, 74.54, 73.03, 71.17, 61.33, 60.00. HRMS (ESI-TOF) *m/z*: [M + COOH]<sup>-</sup> calcd for C<sub>47</sub>H<sub>51</sub>O<sub>13</sub>, 823.3335; Found, 823.3311.

**2,3,2',3'-Tetra-*O*-benzyl-4,4'-di-*O*-(2-propyny)-6,6'-Bis-*O*-(3-nonyldodecanoyl)-*α,α'*-trehalose (**9**)**

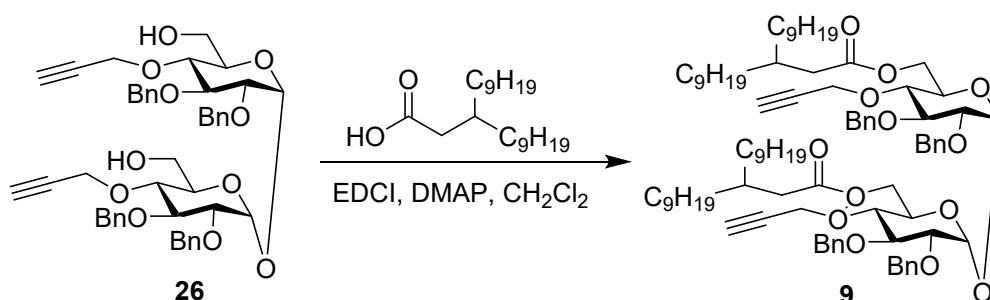

EDCI (37 mg, 1.93 mmol) was added to a mixture of **26** (500 mg, 0.64 mmol), **18** (628 mg, 1.93 mmol) and DMAP (235 mg, 1.93 mmol) in anhydrous DCM (5 mL) at 0 °C. Then, the mixture was stirred for 12 h at 50 °C. The resulting solution was diluted with DCM, washed with saturated NaHCO<sub>3</sub>. The organic layer was dried over anhydrous Na<sub>2</sub>SO<sub>4</sub> and concentrated in vacuum. The crud product was purified by silica gel column chromatography using PE/EA (10:1, v/v) as eluent to give the desired product **9** (759 mg, 85% yield). <sup>1</sup>H NMR (400 MHz, CDCl<sub>3</sub>) δ 7.40 – 7.27 (m, 20H), 5.15 (d, *J* = 3.2 Hz, 2H), 4.99 (d, *J* = 10.8 Hz, 2H), 4.85 (d, *J* = 10.8 Hz, 2H), 4.72 - 4.65 (m, 4H), 4.44 (dd, *J* = 15.2, 2.4 Hz, 2H), 4.30 (dd, *J* = 15.2, 2.4 Hz, 2H), 4.22 – 4.17 (m, 2H), 4.14 – 4.13 (m, 4H), 4.01 (t, *J* = 9.2 Hz, 2H), 3.52 (dd, *J* = 9.6,

3.2 Hz, 2H), 3.45 (t,  $J = 9.2$  Hz, 2H), 2.44 (s, 2H), 1.67 (s, 2H), 2.19 (d,  $J = 6.8$  Hz, 4H), 1.80 (s, 2H), 1.24 (s, 64H), 0.87 (t,  $J = 6.4$  Hz, 12H).  $^{13}\text{C}$  NMR (100 MHz,  $\text{CDCl}_3$ )  $\delta$  173.24, 138.45, 137.71, 128.55, 128.48, 128.11, 127.92, 127.77, 127.58, 94.02, 81.33, 79.70, 79.26, 75.75, 74.62, 72.95, 68.89, 62.59, 60.14, 39.08, 34.86, 33.78, 33.71, 31.93, 29.95, 29.67, 29.64, 29.37, 26.56, 26.51, 22.71, 14.15. HRMS (ESI-TOF)  $m/z$ :  $[\text{M} + \text{Na}]^+$  calcd for  $\text{C}_{88}\text{H}_{130}\text{NaO}_{13}$ , 1417.9404; Found, 1417.9404.

**2,3,2',3'-Tetra-*O*-benzyl-4,4'-di-*O*-(2-propyny)-6,6'-Bis-*O*-(1-docosylmethyl)- $\alpha,\alpha'$ -trehalose (10)**

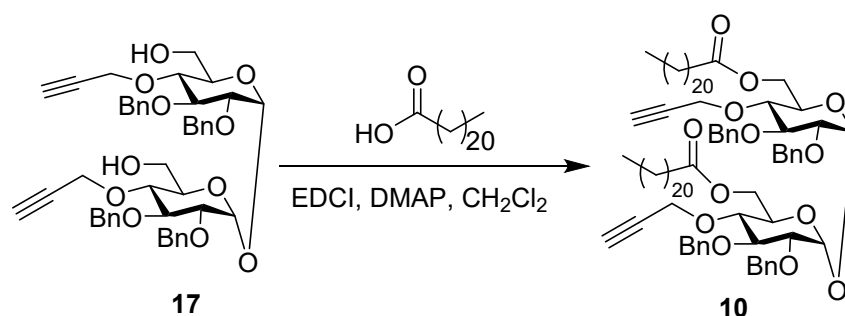

The synthesis of compound **10** is similar to compound **9**. Yield: 86%.  $^1\text{H}$  NMR (400 MHz,  $\text{CDCl}_3$ )  $\delta$  7.37 – 7.25 (m, 20H), 5.15 (s, 2H), 4.99 (d,  $J = 10.8$  Hz, 2H), 4.85 (d,  $J = 10.8$  Hz, 2H), 4.69 (t,  $J = 12.0$  Hz, 4H), 4.43 (d,  $J = 15.6$  Hz, 2H), 4.31 (d,  $J = 15.6$  Hz, 2H), 4.21 – 4.10 (m, 6H), 4.01 (t,  $J = 9.2$  Hz, 2H), 3.54–3.44 (m, 4H), 2.44 (s, 2H), 2.25 (t,  $J = 7.6$  Hz, 2H), 1.58 – 1.55 (m, 5H), 1.25 (s, 72H), 0.88 (t,  $J = 6.8$  Hz, 6H).  $^{13}\text{C}$  NMR (100 MHz,  $\text{CDCl}_3$ )  $\delta$  173.51, 138.41, 137.71, 128.57, 128.51, 128.13, 127.95, 127.81, 127.59, 94.04, 81.36, 79.72, 79.18, 75.76, 74.63, 72.95, 68.90, 62.73, 60.11, 34.16, 31.96, 29.74, 29.70, 29.65, 29.52, 29.40, 29.30, 29.19, 24.88, 22.73, 14.17. HRMS (ESI-TOF)  $m/z$ :  $[\text{M} + \text{Na}]^+$  calcd for  $\text{C}_{90}\text{H}_{134}\text{NaO}_{13}$ , 1445.9710; Found, 1445.9730.

**Compound 27**

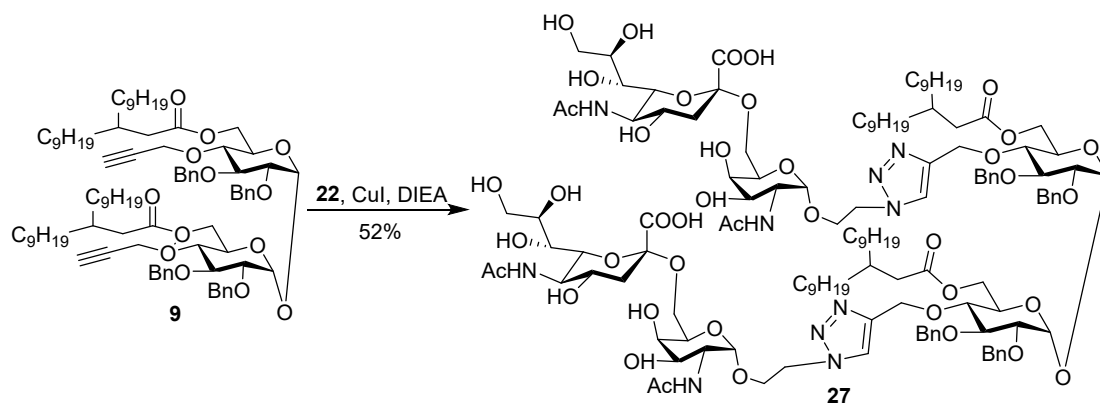

The synthesis of compound **27** was similar to **23**. White solid, yield: 52%.  $^1\text{H}$  NMR (400 MHz,  $\text{CD}_3\text{OD}/\text{CDCl}_3$ )  $\delta$  7.63 (s, 2H), 7.38 - 7.24 (m, 20H), 5.19 - 3.49 (m, 64H, 8H of Ar- $\text{CH}_2$ , 56H of sugar and linker), 2.1 (d, 4H), 1.96 - 2.07 (m, 12H, -NHAc), 1.76 - 1.90 (m, 4H), 1.26 (s, 64H,  $\text{CH}_2$  of lipid), 0.89 (t,  $J = 9.6$  Hz, 12H,  $\text{CH}_3$  of lipid); HRMS (ESI-TOF)  $m/z$ :  $[\text{M} + 2\text{H}]^{2+}$  calcd for  $\text{C}_{130}\text{H}_{202}\text{N}_{10}\text{O}_{41}$ , 1279.7009; Found, 1279.7037.

### Compound **28**

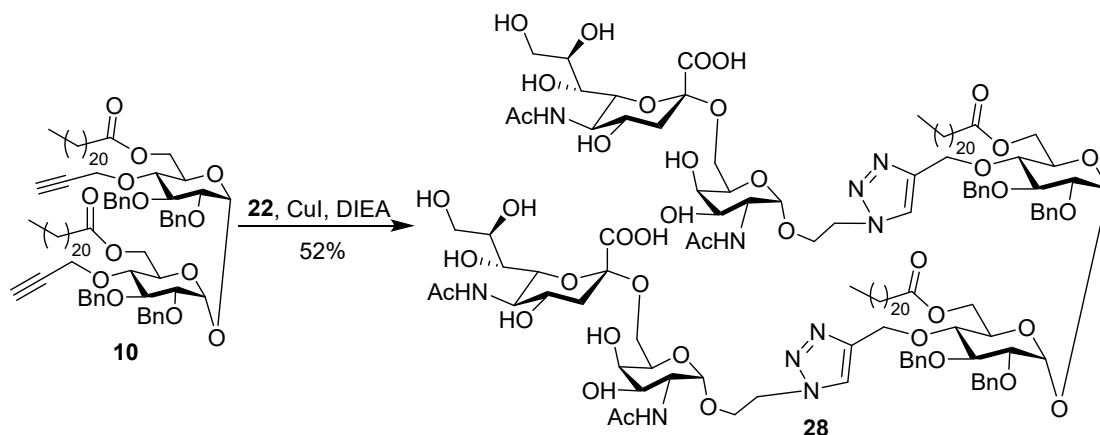

The synthesis of compound **28** was similar to **23**. White solid, yield: 52%.  $^1\text{H}$  NMR (600 MHz,  $\text{CD}_3\text{OD}/\text{CDCl}_3$ )  $\delta$  7.74 (s, 1H), 7.67 (s, 1H), 7.38 - 7.24 (m, 20H), 5.19 - 3.49 (m, 62H, 8H of Ar- $\text{CH}_2$ , 54H of sugar and linker), 2.56 - 2.52 (m, 2H), 2.1 (s, 4H), 2.08 - 1.98 (m, 12H, -NHAc), 1.80 - 1.62 (m, 2H), 1.60 - 1.50 (m, 4H), 1.26 (s, 72H,  $\text{CH}_2$  of lipid), 0.89 (t,  $J = 9.6$  Hz, 6H,  $\text{CH}_3$  of lipid).  $^{13}\text{C}$  NMR (150 MHz,  $\text{CD}_3\text{OD}/\text{CDCl}_3$ )  $\delta$  180.84, 180.65, 178.61, 178.05, 177.95, 149.37, 142.37, 142.17, 141.75, 141.56, 132.60, 132.26, 132.14, 131.64, 131.43, 131.23, 130.08, 104.04, 103.98, 102.13, 101.67, 100.05, 98.99, 85.51, 83.82, 83.02, 82.79, 79.61, 78.31, 77.17,



76.73, 76.41, 76.28, 73.97, 73.84, 73.69, 73.19, 73.05, 72.45, 72.34, 72.11, 71.39, 70.72, 69.66, 68.77, 68.45, 68.22, 66.52, 66.25, 64.29, 58.08, 53.67, 53.22, 52.97, 44.20, 43.69, 38.04, 37.98, 35.75, 33.49, 33.32, 33.29, 33.17, 33.08, 33.04, 32.93, 28.75, 27.17, 26.88, 26.48, 25.91, 17.69, 4.68, 3.44. HRMS (ESI-TOF)  $m/z$ :  $[M + 2H]^{2+}$  calcd for  $C_{132}H_{204}N_{10}O_{41}$ , 1293.7165; Found, 1293.7167.

### Compound 3

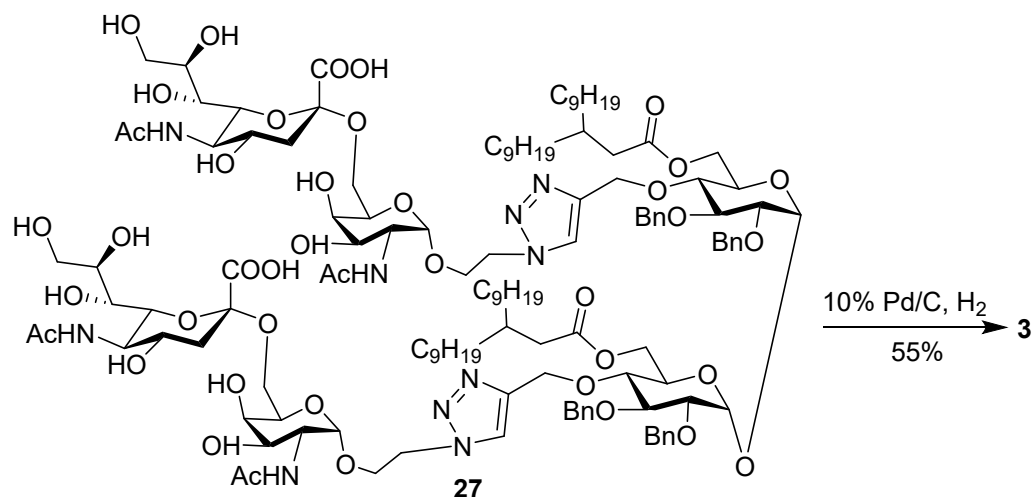

The synthesis of compound **3** was similar to **1**. White solid, yield: 55%. <sup>1</sup>H NMR (600 MHz, CD<sub>3</sub>OD/CDCl<sub>3</sub>)  $\delta$  7.63 (s, 2H), 5.19 - 3.49 (m, 54H of sugar and linker), 2.66 - 2.57 (m, 2H), 2.1 (s, 4H), 1.93 - 1.75 (m, 12H, -NHAc), 1.69 - 1.62 (m, 2H), 1.55 - 1.48 (m, 2H), 1.21 (s, 64H, CH<sub>2</sub> of lipid), 0.89 (t,  $J = 9.6$  Hz, 12H, CH<sub>3</sub> of lipid). HRMS (ESI-TOF)  $m/z$ :  $[M + Na]^+$  calcd for  $C_{102}H_{176}N_{10}NaO_{41}$ , 2220.1887; Found, 2220.1807.

### Compound 4

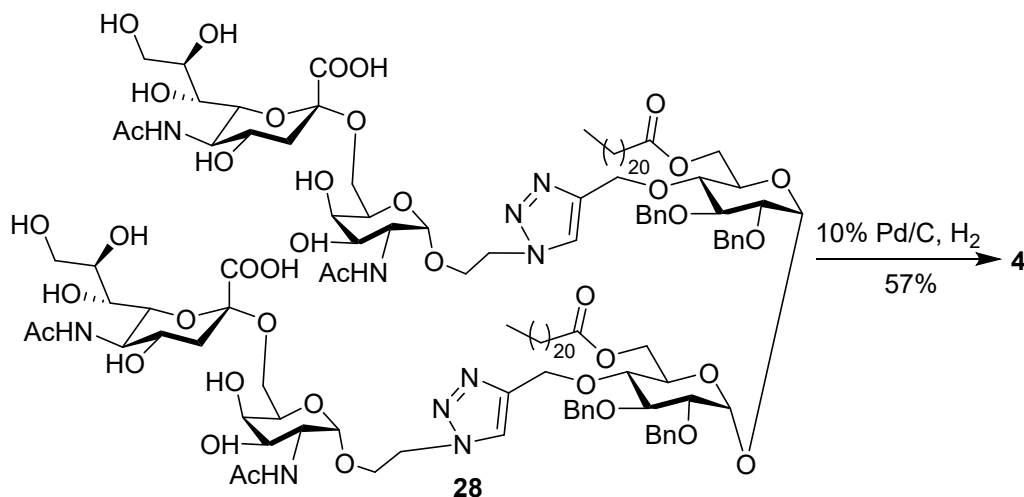

The synthesis of compound **4** was similar to **1**. White solid, yield: 57%. <sup>1</sup>H NMR (600 MHz, CD<sub>3</sub>OD/CDCl<sub>3</sub>) δ 8.09 (s, 2H), 5.10 - 3.00 (m, 54H of sugar and linker), 2.76 - 2.72 (m, 2H), 2.41 - 2.37 (t, 4H), 2.05 (s, 12H, -NHAc), 1.85-1.75 (m, 2H), 1.66-1.62 (m, 4H), 1.26 (s, 72H, CH<sub>2</sub> of lipid), 0.89 (t, *J* = 9.6 Hz, 6H, CH<sub>3</sub> of lipid). HRMS (ESI-TOF) *m/z*: [M+ 2H]<sup>2+</sup> C<sub>104</sub>H<sub>182</sub>N<sub>10</sub>O<sub>41</sub>, 1113.6226; Found, 1113.6251.

## V. Analysis of Sialic Acid Loading of STn-CRM197 and STn-HSA

The conjugate of STn-CRM197 was identified by SDS-PAGE (Fig. S1). The epitope ratio of STn-CRM197 was analyzed by Svennerholm method.<sup>5,6</sup> Accurately weighed samples of STn-CRM197 (0.51 mg) were dissolved in distilled water (0.51 mL), mixed well with resorcinol reagent (2.0 mL), and heated in boiling water for 30 min. The solutions were then cooled to rt and combined with an extraction solution (1-butanol acetate and 1-butanol, 85:15 v/v, 3.0 mL). The mixture was shaken vigorously and allowed to stand still for 10 min to separate the organic layer from inorganic layer. The upper organic layer was transferred to a 96-well plate, and absorbance at 580 nm was determined by a microplate analyzer, using the organic solvents as the blank control. The sialic acid content of the glycoconjugate was determined with a calibration curve created with standard Neu5AcyI solutions and analyzed under the same conditions. Sialic acid loading of the conjugates was calculated according to the following equation:

$$\text{sialic acid loading (\%)} = \frac{\text{weight of sialic acid (mg) of the sample}}{\text{weight of the glycoconjugate sample (mg)}} \times 100\%$$

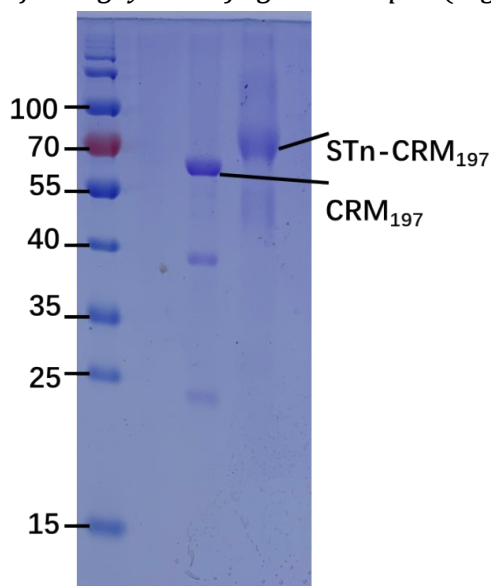

**Fig. S1** STn-CRM197 characterization

**Table S1** The absorbance of standard Neu5Acyl solutions in different concentrations

| Sialic acid ( $\mu\text{g}$ ) | 1      | 2      | 3      | Mean     |
|-------------------------------|--------|--------|--------|----------|
| 10                            | 0.2163 | 0.2143 | 0.2317 | 0.220767 |
| 20                            | 0.3423 | 0.3222 | 0.3476 | 0.337367 |
| 30                            | 0.4280 | 0.4357 | 0.4357 | 0.433133 |
| 40                            | 0.4576 | 0.4634 | 0.4692 | 0.4634   |
| 50                            | 0.6041 | 0.6142 | 0.5731 | 0.597133 |
| 60                            | 0.6428 | 0.6616 | 0.6668 | 0.657067 |
| 70                            | 0.7018 | 0.7782 | 0.7941 | 0.758033 |
| 80                            | 0.8328 | 0.8750 | 0.8579 | 0.855233 |

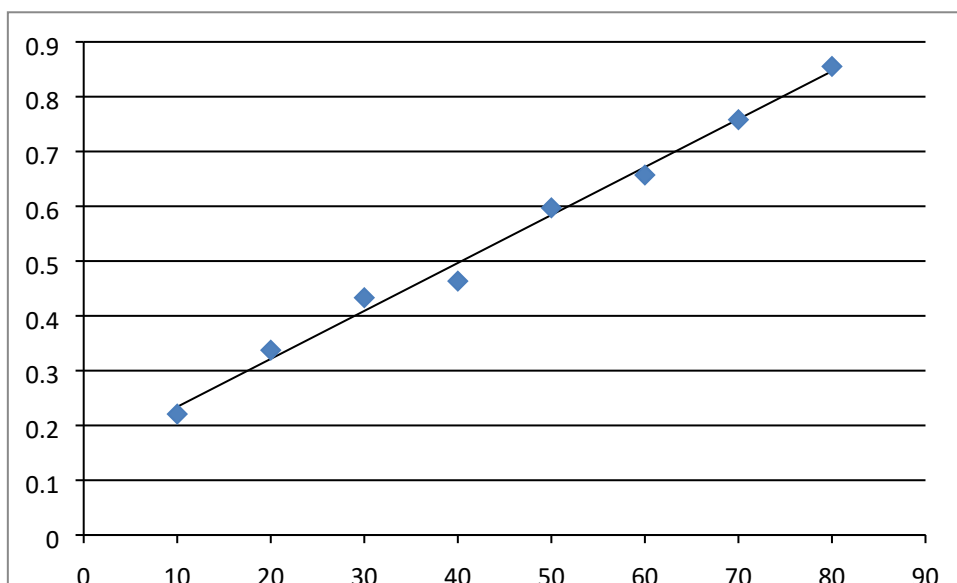

**Fig. S2** The calibration curve created with standard Neu5Acyl solutions

**Table S2** The absorbance of STn-CRM197 solution

| NO.  | absorbance |
|------|------------|
| 1    | 0.4795     |
| 2    | 0.4833     |
| 3    | 0.4992     |
| 4    | 0.4772     |
| 5    | 0.4884     |
| 6    | 0.4793     |
| mean | 0.484483   |

$$\text{sialic acid loading (\%)} = \frac{38.407}{400} \times 100\% = 9.60\%$$

The carbohydrate loading of **6**, which was analyzed with MALDI-TOF MS (Fig. S3).

Multiple Spectra Report

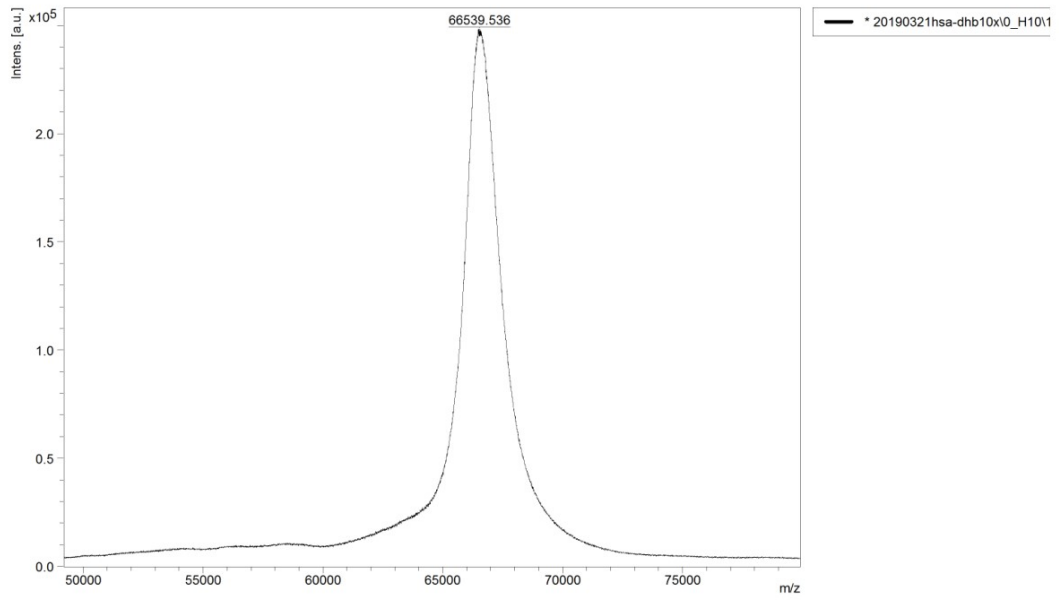

Multiple Spectra Report

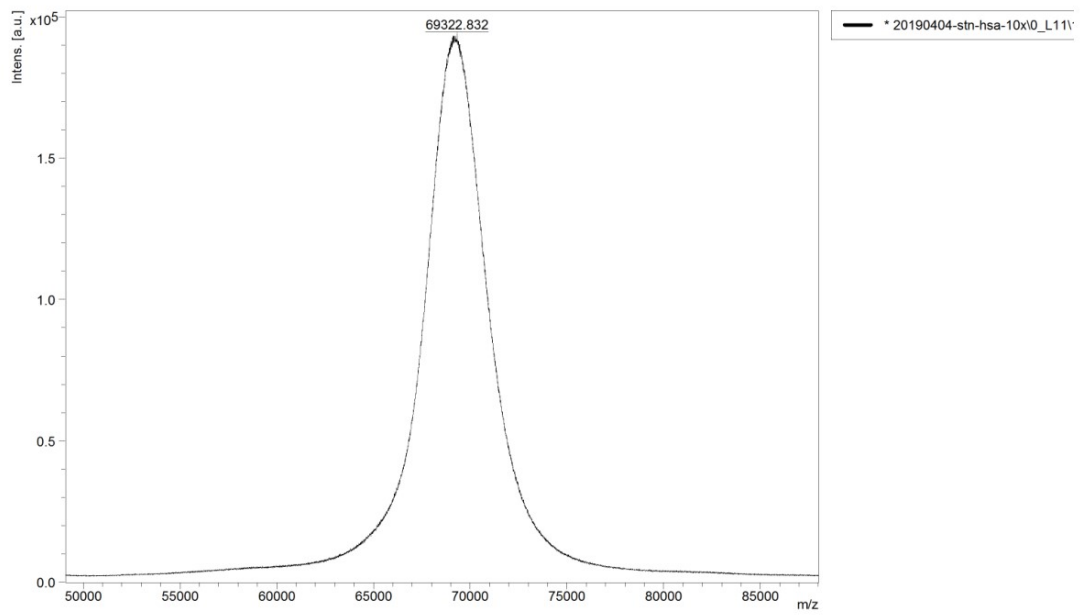

**Figure S3.** Characterization of STn-HSA

## VI. Synthesis of Triazole-HSA Conjugate

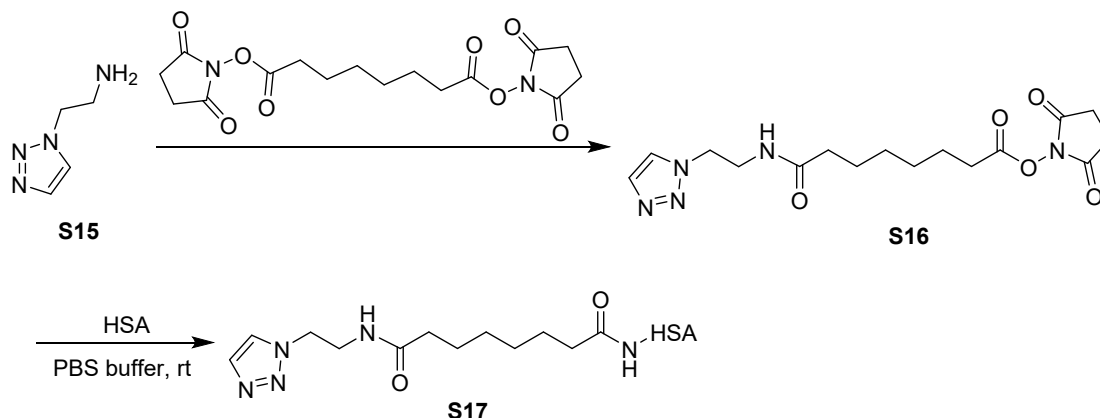

A solution of 2-(1H-1,2,3-triazol-1-yl)ethan-1-amine (**S15**) (5 mg, 0.045 mmol), bis(2,5-dioxopyrrolidin-1-yl) octanedioate (20 mg, 0.045 mmol) and triethylamine (5  $\mu$ L) in anhydrous DMSO was stirred at rt for 5 h. Then, the excess triethylamine was removed in vacuum at rt to give the DMSO solution of **S16**, which was used directly for the next step without purification.

A solution of HSA (2 mg) in 0.5 mL of 0.1 M PBS buffer was gently stirred at rt, then the above solution of **S16** was added with dropwise. After stirring for 2.5 days, the mixture was purified on a Biogel A 0.5 column with 0.1 M PBS buffer as the eluent. The combined fractions containing the glycoconjugate indicated by the bicinchoninic acid (BCA) assay for proteins were dialyzed in distilled water for 2 days, and then lyophilized to obtain the desired conjugates **S17** as white solid.

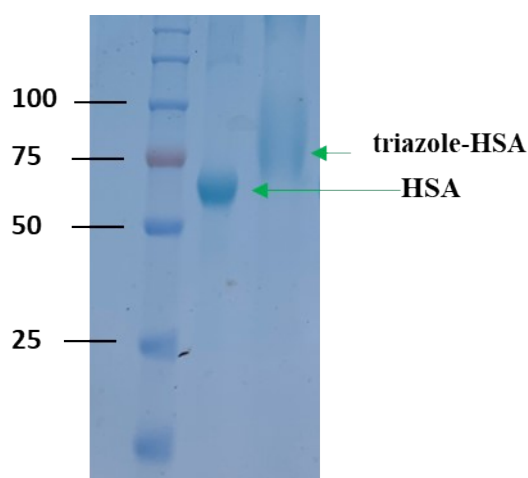

**Fig. S4** Triazole-HSA characterization.  
S25

## VII. Synthesis of Mincle Ligands Vizantin and TDB

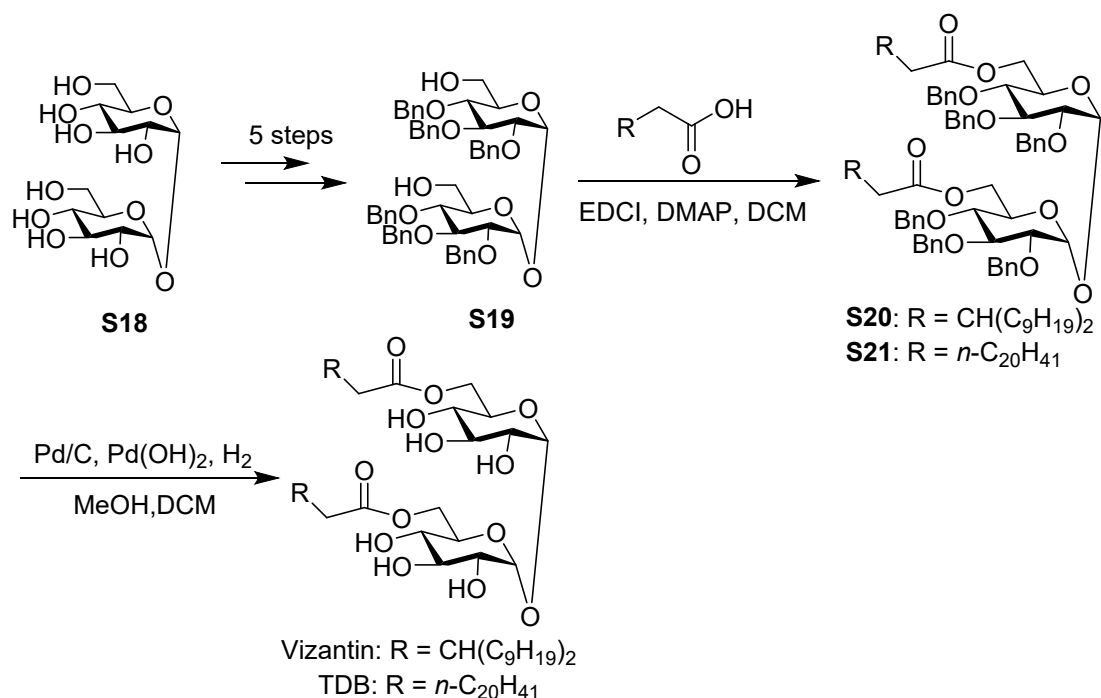

The synthesis of vizantin and TDB started from trehalose according to the literature reported protocol<sup>2</sup>. Some typical experimental details are as follows.

(1) **The synthesis of 2,3,4,2',3',4'-Tetra-O-benzyl-6,6'-Bis-O-(3-nonyldodecanoyl)- $\alpha,\alpha'$ -trehalose (S20).** EDCI (86 mg, 0.45 mmol) was added to a mixture of **S19** (100 mg, 0.11 mmol), **18** (77.5 mg, 0.24 mmol) and DMAP (69 mg, 0.56 mmol) in anhydrous DCM (5 mL) at rt. Then, the mixture was stirred for 6 h under 50 °C. The resulting mixture was diluted with DCM and washed with brine. The organic layer was dried over anhydrous Na<sub>2</sub>SO<sub>4</sub> and concentrated in vacuum. The crude product was purified by silica gel column chromatography using PE/EA (10: 1, v/v) as eluent to give the desired product as a colorless oil (20.0 mg, 85%). <sup>1</sup>H NMR (400 MHz, CDCl<sub>3</sub>)  $\delta$  7.40 – 7.21 (m, 30H), 5.18 (d, *J* = 3.6 Hz, 2H), 5.00 (d, *J* = 10.8 Hz, 2H), 4.86 (dd, *J* = 10.7 Hz, 4H), 4.76 – 4.64 (m, 4H), 4.32 (dt, *J* = 10.1, 2.8 Hz, 2H), 4.15 (dd, *J* = 12.2, 3.4 Hz, 2H), 4.11 – 4.01 (m, 4H), 3.59 – 3.49 (m, 4H), 2.19 (d, *J* = 6.9 Hz, 4H), 1.87 – 1.74 (m, 2H), 1.37 – 1.13 (m, 64H), 0.87 (td, *J* = 6.9, 1.7 Hz, 12H). <sup>13</sup>C NMR (100 MHz, CDCl<sub>3</sub>)  $\delta$  173.26, 138.64, 137.82, 128.50, 128.48, 128.43,

128.09, 127.94, 127.89, 127.80, 127.65, 127.47, 94.02, 81.60, 79.45, 77.67, 75.72, 75.31, 72.99, 69.17, 62.40, 39.13, 34.93, 33.82, 31.71, 33.93, 29.96, 29.68, 29.63, 29.36, 26.56, 26.53, 22.71, 14.15. HRMS (ESI-TOF)  $m/z$ :  $[M + Na]^+$  calcd for  $C_{96}H_{138}O_{13}Na$ , 1522.0016; Found, 1522.0012.

(2) **The synthesis of 2,3,4,2',3',4'-Tetra-*O*-benzyl -6,6'-Bis-*O*-(1-docosylmethyl)- $\alpha,\alpha'$ -trehalose (S21).** The synthesis of compound **S21** was similar to **20** just using compound **19** instead of **18**. Colorless oil, yield: 70%.  $^1H$  NMR (400 MHz,  $CDCl_3$ )  $\delta$  7.37 – 7.25 (m, 30H), 5.17 (d,  $J = 3.6$  Hz, 2H), 5.00 (d,  $J = 10.8$  Hz, 2H), 4.86 (dd,  $J = 10.7, 2.6$  Hz, 4H), 4.75 – 4.65 (m, 4H), 4.52 (d,  $J = 10.6$  Hz, 2H), 4.26 – 4.19 (m, 2H), 4.18 – 4.12 (m, 2H), 4.10 – 4.02 (m, 4H), 3.61 – 3.52 (m, 4H), 2.23 (dd,  $J = 8.3, 6.8$  Hz, 4H), 1.24 (m, 72H), 0.92 – 0.85 (m, 6H).  $^{13}C$  NMR (100 MHz,  $CDCl_3$ )  $\delta$  173.48, 138.62, 137.82, 128.57, 128.52, 128.50, 128.46, 128.32, 128.14, 127.98, 127.96, 127.83, 127.69, 127.49, 94.03, 81.64, 79.38, 77.56, 77.26, 75.74, 75.24, 72.99, 69.19, 62.55, 34.15, 31.97, 29.75, 29.70, 29.65, 29.52, 29.40, 29.31, 29.19, 24.91, 22.73, 14.17. HRMS (ESI-TOF)  $m/z$ :  $[M + Na]^+$  calcd for  $C_{98}H_{142}O_{13}Na$ , 1551.0365; Found, 1551.0368.

(3) **The synthesis of vizantin.** A mixture of **S20** (200.0 mg),  $Pd(OH)_2$  (68.0 mg) and  $Pd/C$  (65.0 mg) was stirred in the solution of DCM and MeOH (3: 1, v/v, 40.0 mL) under a  $H_2$  atmosphere at rt for 6h. The reaction mixture was filtered through a pad of Celite and the filtrate was concentrated in vacuum to give vizantin (99.0 mg, 77.3%).  $^1H$  NMR (400 MHz,  $MeOD/CDCl_3$ )  $\delta$  5.11 (d,  $J = 3.5$  Hz, 2H, H-1), 4.31 (d,  $J = 2.3$  Hz, 4H), 4.04 – 3.90 (m, 2H), 3.80 (t,  $J = 9.2$  Hz, 2H), 3.53 (m, 2H), 3.38 (s, 2H), 2.29 (d,  $J = 6.9$  Hz, 4H), 1.84 (s, 2H), 1.27 (s, 64H), 0.98 – 0.70 (m, 12H).  $^{13}C$  NMR (100 MHz,  $CD_3OD/CDCl_3$ )  $\delta$  174.93, 94.44, 73.82, 72.35, 71.12, 70.87, 63.71, 39.61, 35.45, 34.24, 32.43, 30.42, 30.15, 30.13, 30.03, 29.87, 27.02, 27.00, 23.18, 14.46. HRMS (ESI-TOF)  $m/z$ :  $[M + Na]^+$  calcd for  $C_{54}H_{102}O_{13}Na$ , 981.7213; Found, 981.7210.

(4) **The synthesis of TDB.** The synthesis of compound **TDB** was similar to **vizantin** just using compound **S21** instead of **S20**. Yield: 96.2%.  $^1H$  NMR (400 MHz,



MeOD/CDCl<sub>3</sub>)  $\delta$  5.02 (d,  $J$  = 2.8 Hz, 2H, H-1), 4.34 – 4.14 (m, 4H), 3.98 – 3.87 (m, 2H), 3.72 (s, 2H), 3.45 (d,  $J$  = 8.4 Hz, 2H), 3.30 (d,  $J$  = 7.4 Hz, 2H), 2.26 (t,  $J$  = 7.5 Hz, 4H), 1.54 (t,  $J$  = 7.2 Hz, 4H), 1.18 (s, 72H), 0.80 (t,  $J$  = 6.7 Hz, 6H). <sup>13</sup>C NMR (100 MHz, CD<sub>3</sub>OD/CDCl<sub>3</sub>)  $\delta$  175.18, 94.26, 73.89, 72.28, 71.01, 70.68, 63.83, 34.70, 32.47, 30.23, 30.18, 30.04, 29.89, 29.83, 29.69, 25.43, 23.20, 14.43. HRMS (ESI-TOF)  $m/z$ : [M + Na]<sup>+</sup> calcd for C<sub>56</sub>H<sub>106</sub>O<sub>13</sub>Na, 1009.7521; Found, 1009.7507.

### VIII. Binding affinity of conjugates 1-4 to hMincle

**Table S3** The binding affinity of conjugates 1-4 to hMincle-Fc and hMincle-His proteins

|           | OD ( hMincle-Fc ) |      |   | OD ( hMincle-His ) |      |   |
|-----------|-------------------|------|---|--------------------|------|---|
|           | Mean              | SD   | N | Mean               | SD   | N |
| Control   | 0.09              | 0.01 | 3 | 0.09               | 0.01 | 3 |
| DSPC/Chol | 0.20              | 0.13 | 3 | 0.39               | 0.08 | 3 |
| Vizantin  | 3.14              | 0.15 | 3 | 2.93               | 0.06 | 3 |
| TDB       | 3.06              | 0.11 | 3 | 2.62               | 0.07 | 3 |
| Conj. 1   | 3.47              | 0.07 | 3 | 3.18               | 0.24 | 3 |
| Conj. 2   | 3.11              | 0.11 | 3 | 2.63               | 0.04 | 3 |
| Conj. 3   | 3.28              | 0.17 | 3 | 3.08               | 0.15 | 3 |
| Conj. 4   | 3.20              | 0.13 | 3 | 2.84               | 0.10 | 3 |

### IX. Abilities of conjugates 1-4 to induce the production of TNF- $\alpha$ and

#### IL-6

**Table S4** The capabilities of conjugates 1-4 to induce BMDMs to produce inflammatory cytokines IL-6 and TNF- $\alpha$

| Control  | IL-6          |       |   |           |       |   | TNF- $\alpha$ |       |   |           |       |   |
|----------|---------------|-------|---|-----------|-------|---|---------------|-------|---|-----------|-------|---|
|          | DMSO Solution |       |   | DSPC/Chol |       |   | DMSO Solution |       |   | DSPC/Chol |       |   |
|          | Mean          | SD    | N | Mean      | SD    | N | Mean          | SD    | N | Mean      | SD    | N |
| Vizantin | 3.39          | 1.92  | 3 | 8.37      | 2.79  | 3 | 6.12          | 0.27  | 3 | 17.08     | 4.74  | 3 |
| LPS      | 60.39         | 5.53  | 3 | 106.99    | 4.00  | 3 | 101.34        | 10.82 | 3 | 158.39    | 4.35  | 3 |
| Vizantin | 37.05         | 7.82  | 3 | 86.95     | 3.65  | 3 | 74.42         | 7.30  | 3 | 132.83    | 16.41 | 3 |
| TDB      | 37.64         | 8.21  | 3 | 76.31     | 7.25  | 3 | 74.37         | 3.10  | 3 | 112.36    | 20.98 | 3 |
| Conj. 1  | 58.92         | 7.17  | 3 | 106.17    | 3.82  | 3 | 66.24         | 4.49  | 3 | 155.08    | 3.05  | 3 |
| Conj. 2  | 50.21         | 10.21 | 3 | 78.03     | 21.46 | 3 | 54.83         | 11.21 | 3 | 142.55    | 5.39  | 3 |

|         |       |      |   |       |       |   |       |      |   |        |      |   |
|---------|-------|------|---|-------|-------|---|-------|------|---|--------|------|---|
| Conj. 3 | 32.98 | 1.88 | 3 | 69.24 | 20.63 | 3 | 39.54 | 3.52 | 3 | 130.48 | 6.63 | 3 |
| Conj. 4 | 41.33 | 4.00 | 3 | 79.81 | 21.53 | 3 | 55.61 | 4.81 | 3 | 133.19 | 5.50 | 3 |

## X. Liposomes Size Analysis of the Conjugates 1-4

The liposomal size of conjugates 1-4 prepared for the immunization of mice was detected by laser particle size meter. The sample was tested three times, and the results are listed in Table S5. It was concluded that the average diameter of conjugate 1, 2, 3, and 4 were  $700.3 \pm 192.0$  (SD),  $717.0 \pm 62.9$ ,  $890.5 \pm 94.4$ , and  $789.5 \pm 51.6$  nm, respectively. The polydispersity index (PDI) of them were around 0.2200, 0.2150, 0.3060, and 0.111, respectively (Table S5-S8).

**Table S5** Liposomes size analysis results of conjugate 1

| Conjugate 1 |        |            |
|-------------|--------|------------|
| Test        | PDI    | Size(d,nm) |
| #1          | 0.1650 | 515.7000   |
| #2          | 0.1310 | 686.3000   |
| #3          | 0.3640 | 898.9000   |
| Ave         | 0.2200 | 700.3000   |
| SD          | 0.1260 | 192.0000   |

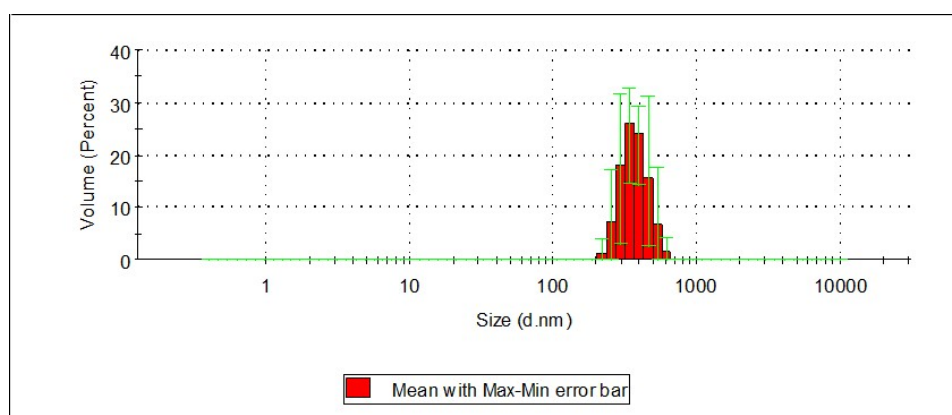

**Fig. S5.** Size distribution of the liposomes of conjugate 1

**Table S6** Liposomes size analysis results of conjugate 2

| Conjugate 2 |     |            |
|-------------|-----|------------|
| Test        | PDI | Size(d,nm) |

|            |        |          |
|------------|--------|----------|
| <b>#1</b>  | 0.2580 | 698.1000 |
| <b>#2</b>  | 0.3440 | 787.2000 |
| <b>#3</b>  | 0.0430 | 665.6000 |
| <b>Ave</b> | 0.215  | 717.0000 |
| <b>SD</b>  | 0.155  | 62.9600  |

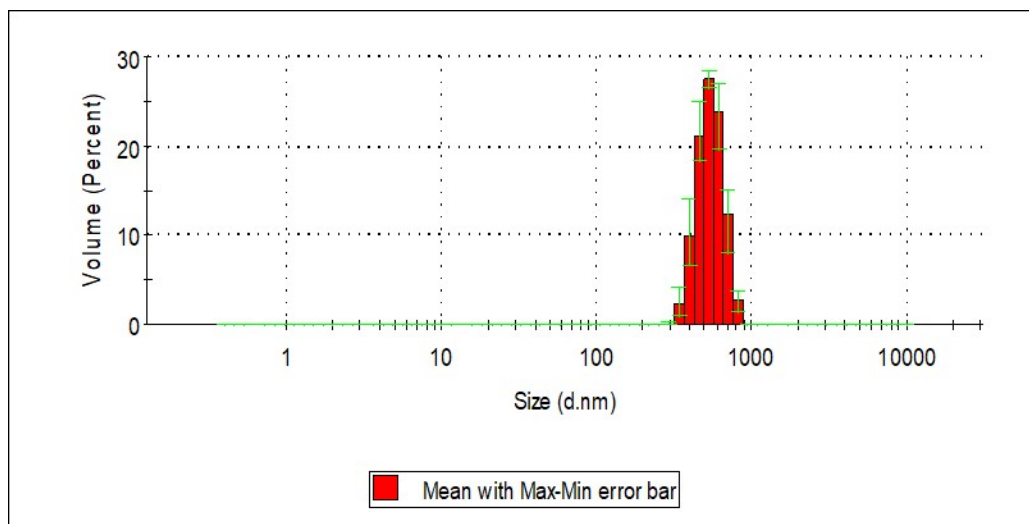

**Fig. S6.** Size distribution of the liposomes of conjugate 2

**Table S7** Liposomes size analysis results of conjugate 3

| <b>Test</b> | <b>PDI</b> | <b>Size(d,nm)</b> |
|-------------|------------|-------------------|
| <b>#1</b>   | 0.2810     | 800.6000          |
| <b>#2</b>   | 0.2880     | 988.9000          |
| <b>#3</b>   | 0.3480     | 881.9000          |
| <b>Ave</b>  | 0.3060     | 890.5000          |
| <b>SD</b>   | 0.0370     | 94.4400           |

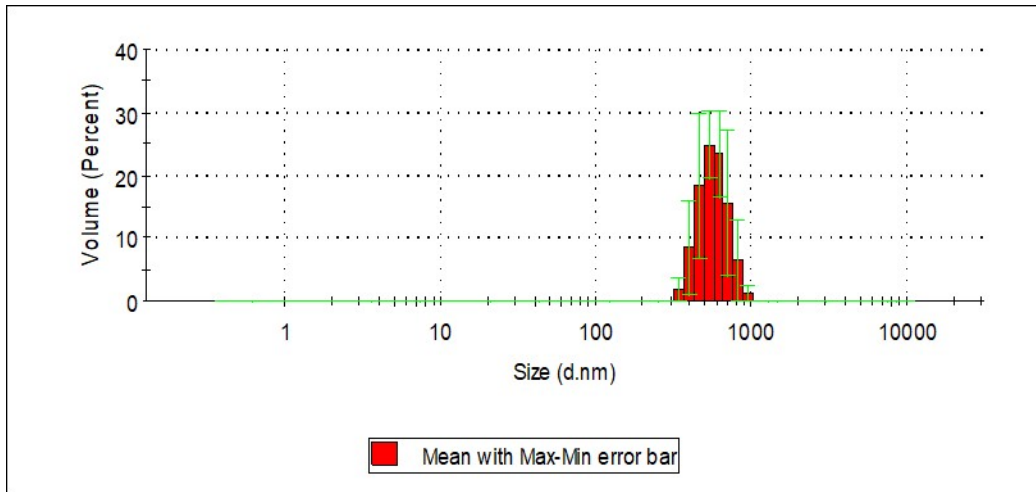

**Fig. S7.** Size distribution of the liposomes of conjugate 3

**Table S8** Liposomes size analysis results of conjugate 4

| <b>Conjugate 4</b> |            |                   |
|--------------------|------------|-------------------|
| <b>Test</b>        | <b>PDI</b> | <b>Size(d,nm)</b> |
| <b>1</b>           | 0.0970     | 729.9000          |
| <b>2</b>           | 0.0200     | 819.2000          |
| <b>3</b>           | 0.2170     | 819.4000          |
| <b>Ave</b>         | 0.111      | 789.5000          |
| <b>SD</b>          | 0.099      | 51.6200           |

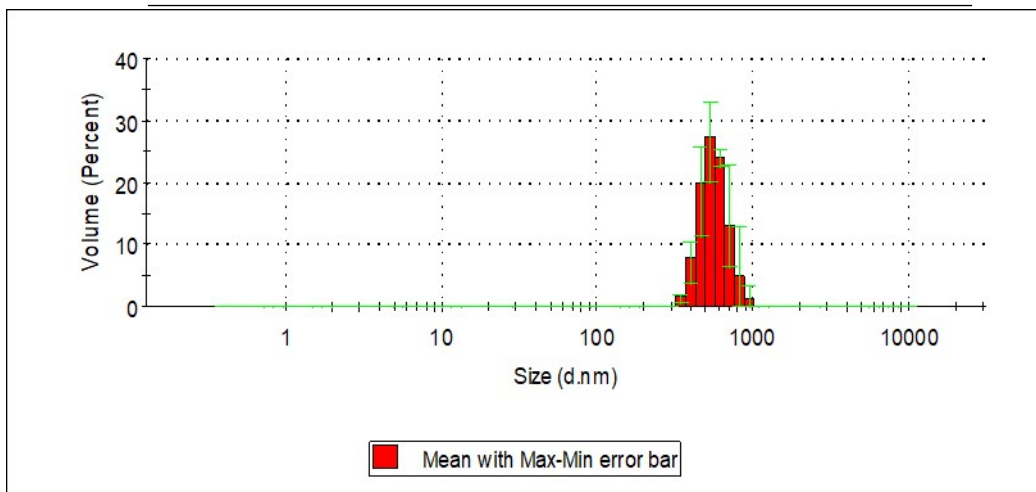

**Fig. S8.** Size distribution of the liposomes of conjugate 4

## XI. Calculated Antibody Titers of ELISA Experiments

**Table S9** The Ig M antibody titers of pooled day 21, 27, and 38 sera derived from mice immunized with conjugate **1-5**

|        | d21   |      |   | d27   |      |   | d38   |      |   |
|--------|-------|------|---|-------|------|---|-------|------|---|
|        | Mean  | SD   | N | Mean  | SD   | N | Mean  | SD   | N |
| Conj.1 | 15105 | 2022 | 3 | 23824 | 3885 | 3 | 16963 | 4484 | 3 |
| Conj.2 | 45964 | 3755 | 3 | 51308 | 1795 | 3 | 29145 | 4025 | 3 |
| Conj.3 | 33306 | 4884 | 3 | 46726 | 3726 | 3 | 30318 | 5805 | 3 |
| Conj.4 | 5411  | 2402 | 3 | 37558 | 3866 | 3 | 32386 | 2554 | 3 |
| Conj.5 | 55113 | 1143 | 3 | 69818 | 2123 | 3 | 38752 | 7814 | 3 |

**Table S10** The Ig G antibody titers of pooled day 21, 27, and 38 sera derived from mice immunized with conjugate **1-5**

|        | d21   |      |   | d27   |      |   | d38    |      |   |
|--------|-------|------|---|-------|------|---|--------|------|---|
|        | Mean  | SD   | N | Mean  | SD   | N | Mean   | SD   | N |
| Conj.1 | 48583 | 2723 | 3 | 75388 | 2585 | 3 | 157970 | 5385 | 3 |
| Conj.2 | 14426 | 302  | 3 | 42619 | 426  | 3 | 94855  | 1635 | 3 |
| Conj.3 | 31264 | 832  | 3 | 65737 | 1007 | 3 | 156389 | 2695 | 3 |
| Conj.4 | 14668 | 304  | 3 | 40971 | 4367 | 3 | 112054 | 1708 | 3 |
| Conj.5 | 41782 | 1098 | 3 | 78775 | 4348 | 3 | 97150  | 4390 | 3 |

**Table S11** The antibody titers of Kappa, IgG subclasses, and IgM in mice antisera on day 38 induced by conjugate **1**

| Mouse | 1      | 2      | 3      | 4      | 5      | 6      | Mean   |
|-------|--------|--------|--------|--------|--------|--------|--------|
| Kappa | 221904 | 112420 | 102744 | 140084 | 154817 | 76115  | 134681 |
| IgG1  | 77652  | 200787 | 34201  | 16318  | 18215  | 156373 | 83924  |
| IgG2a | 92041  | 117008 | 96761  | 46630  | 80017  | 94845  | 87884  |
| IgG2b | 52575  | 56954  | 80822  | 26108  | 26108  | 94845  | 56235  |

|      |       |       |       |       |       |       |       |
|------|-------|-------|-------|-------|-------|-------|-------|
| IgG3 | 11048 | 29144 | 13494 | 16815 | 8691  | 15835 | 15838 |
| IgM  | 39340 | 37421 | 37049 | 35954 | 33523 | 35596 | 36481 |

**Table S12** The antibody titers of Kappa, IgG subclasses, and IgM in mice antisera on day 38 induced by conjugate 2

| Mouse | 1     | 2     | 3     | 4     | 5     | 6     | Mean  |
|-------|-------|-------|-------|-------|-------|-------|-------|
| Kappa | 40946 | 92967 | 79221 | 49021 | 47572 | 45707 | 59239 |
| IgG1  | 15063 | 6974  | 46166 | 15678 | 17501 | 5115  | 17750 |
| IgG2a | 52575 | 57526 | 97733 | 52575 | 67508 | 58689 | 64434 |
| IgG2b | 29437 | 16984 | 26370 | 36316 | 19536 | 18398 | 24507 |
| IgG3  | 14765 | 10301 | 14765 | 12088 | 11384 | 9897  | 12200 |
| IgM   | 38561 | 27174 | 33523 | 34201 | 28567 | 28567 | 31765 |

**Table S13** The antibody titers of Kappa, IgG subclasses, and IgM in mice antisera on day 38 induced by conjugate 3

| Mouse | 1      | 2     | 3      | 4     | 5      | 6      | Mean   |
|-------|--------|-------|--------|-------|--------|--------|--------|
| Kappa | 101722 | 92042 | 276509 | 30946 | 31257  | 144351 | 112805 |
| IgG1  | 103777 | 78433 | 105873 | 92967 | 137311 | 111302 | 104944 |
| IgG2a | 14045  | 28001 | 28283  | 34201 | 43915  | 27889  | 29389  |
| IgG2b | 8866   | 25848 | 18034  | 21163 | 40135  | 23156  | 22867  |
| IgG3  | 493    | 5014  | 2540   | 1901  | 1703   | 953    | 2101   |
| IgM   | 1863   | 16814 | 5826   | 11271 | 3678   | 2122   | 6929   |

**Table S14** The antibody titers of Kappa, IgG subclasses, and IgM in mice antisera on day 38 induced by conjugate 4

| Mouse | 1      | 2      | 3      | 4      | 5      | 6      | Mean   |
|-------|--------|--------|--------|--------|--------|--------|--------|
| Kappa | 128028 | 110194 | 77653  | 194853 | 179872 | 74608  | 127534 |
| IgG1  | 32860  | 43045  | 12333  | 58689  | 29437  | 27723  | 34014  |
| IgG2a | 108012 | 110194 | 101722 | 113550 | 121784 | 103777 | 109840 |
| IgG2b | 39735  | 66836  | 48050  | 99708  | 30638  | 57526  | 57082  |
| IgG3  | 41773  | 30946  | 16482  | 19930  | 30946  | 43478  | 30592  |
| IgM   | 40135  | 39340  | 21163  | 51021  | 50514  | 43478  | 40942  |

**Table S15** The antibody titers of Kappa, IgG subclasses, and IgM in mice antisera on day 38 induced by conjugate **5**

| Mouse | 1      | 2      | 3      | 4      | 5     | 6     | Mean  |
|-------|--------|--------|--------|--------|-------|-------|-------|
| Kappa | 185350 | 196811 | 101722 | 36315  | 35596 | 34201 | 98333 |
| IgG1  | 54176  | 72403  | 54721  | 106937 | 38561 | 97734 | 70755 |
| IgG2a | 880    | 934    | 198    | 589    | 450   | 77    | 522   |
| IgG2b | 19732  | 9228   | 12333  | 16155  | 6836  | 8350  | 12106 |
| IgG3  | 23861  | 14618  | 2864   | 1436   | 3752  | 13767 | 10050 |
| IgM   | 37421  | 42617  | 22248  | 18770  | 40946 | 36680 | 33114 |

**Table S16** Titers of IgG antibody reactive to triazole-HSA in the pooled day 38 sera obtained with conjugate **1-4**.

|   | Mean  | SD   | N |
|---|-------|------|---|
| 1 | 43612 | 1603 | 3 |
| 2 | 27552 | 7047 | 3 |
| 3 | 16546 | 3570 | 3 |
| 4 | 18609 | 7938 | 3 |

**Table S17** Titers of IgG antibody reactive to trehalose derivative in the pooled day 38 sera obtained with conjugate **1-5**

|   | Mean  | SD   | N |
|---|-------|------|---|
| 1 | 24680 | 4221 | 3 |
| 2 | 20961 | 5381 | 3 |
| 3 | 17811 | 3711 | 3 |
| 4 | 24919 | 5498 | 3 |
| 5 | 245   | 32   | 3 |

**Table S18** Titers of IgG antibody reactive to CRM197 in the pooled day 38 sera obtained with conjugate **1-5**

|   | Mean   | SD    | N |
|---|--------|-------|---|
| 1 | 413    | 285   | 3 |
| 2 | 438    | 206   | 3 |
| 3 | 184    | 234   | 3 |
| 4 | 638    | 157   | 3 |
| 5 | 203014 | 11217 | 3 |

## **XII. ELISpot Assay**

**Table S19** IFN- $\gamma$  and IL-4 spot-forming cells responding to conjugates **1-5**

|         | IFN- $\gamma$ |      |   | IL-4  |      |   |
|---------|---------------|------|---|-------|------|---|
|         | Mean          | SD   | N | Mean  | SD   | N |
| Control | 5             | 2    | 3 | 13.7  | 3.1  | 3 |
| 1       | 124.3         | 9.5  | 3 | 467.3 | 14.8 | 3 |
| 2       | 226.0         | 81.0 | 3 | 130.7 | 29.3 | 3 |
| 3       | 194.7         | 24.5 | 3 | 398.7 | 58.4 | 3 |
| 4       | 37.0          | 13.0 | 3 | 93.3  | 36.5 | 3 |
| 5       | 42.3          | 7.5  | 3 | 198   | 40.3 | 3 |



### XIII. FACS Analyses

**Table S20** Mean FITC-A and collected MCF-7 cells of each group

| Name        | NS    | 1     | 2     | 3     | 4     | 5     |
|-------------|-------|-------|-------|-------|-------|-------|
| Mean FITC-A | 1006  | 33071 | 21436 | 26351 | 19808 | 11911 |
| Cells       | 10000 | 10000 | 10000 | 10000 | 10000 | 10000 |

**Table S21** Mean FITC-A and collected CT-26 cells of each group

| Name        | NS    | 1     | 2     | 3     | 4     | 5     |
|-------------|-------|-------|-------|-------|-------|-------|
| Mean FITC-A | 8680  | 42705 | 15464 | 18643 | 14873 | 18336 |
| Cells       | 10000 | 10000 | 10000 | 10000 | 10000 | 10000 |

**Table S22** Mean FITC-A and collected B16-F10 cells of each group

| Name        | NS    | 1     | 2     | 3     | 4     | 5     |
|-------------|-------|-------|-------|-------|-------|-------|
| Mean FITC-A | 13170 | 13457 | 10413 | 10639 | 10729 | 11872 |
| Cells       | 10000 | 10000 | 10000 | 10000 | 10000 | 10000 |

### XIV. Antibody-Mediated Complement-Dependent Cytotoxicity (CDC)

**Table S23** lysis of MCF-7 cancer cell through antibody-mediated CDC

| Name | NS   | 1    | 2    | 3    | 4    | 5    |
|------|------|------|------|------|------|------|
| Mean | 11.6 | 61.7 | 53.1 | 60.3 | 52.8 | 46.3 |
| SD   | 5.9  | 4.3  | 5.6  | 6.3  | 6.1  | 5.4  |
| N    | 6    | 6    | 6    | 6    | 6    | 6    |

**Table S24** lysis of CT-26 cancer cell through antibody-mediated CDC

| Name | NS   | 1    | 2    | 3    | 4    | 5    |
|------|------|------|------|------|------|------|
| Mean | 15.1 | 37.3 | 35.4 | 32.0 | 33.4 | 33.7 |
| SD   | 2.1  | 4.1  | 3.6  | 3.5  | 6.5  | 3.2  |
| N    | 6    | 6    | 6    | 6    | 6    | 6    |

**Table S25** lysis of B16-F10 cancer cell through antibody-mediated CDC

| Name | NS  | 1   | 2   | 3   | 4   | 5   |
|------|-----|-----|-----|-----|-----|-----|
| Mean | 3.9 | 5.3 | 4.6 | 5.2 | 5.9 | 5.2 |
| SD   | 2.4 | 2.9 | 2.2 | 2.5 | 2.5 | 2.6 |
| N    | 6   | 6   | 6   | 6   | 6   | 6   |

## XV. Tumor Challenge Studies

**Table S26** Tumor sizes (mm<sup>3</sup>) with time

| Group   | Days | 10     | 12     | 14      | 16      | 18      | 20      | 23     | 25      | 27      |
|---------|------|--------|--------|---------|---------|---------|---------|--------|---------|---------|
| PBS     | Mean | 229.97 | 631.98 | 1651.87 | 1882.77 | 2131.23 | --      | --     | --      | --      |
|         | SD   | 122.81 | 316.19 | 1594.28 | 510.06  | 478.63  | --      | --     | --      | --      |
|         | N    | 8      | 8      | 7       | 6       | 3       | --      | --     | --      | --      |
| PBS/CP  | Mean | 226.64 | 466.95 | 875.26  | 1776.06 | 2740.53 | 2539.44 | --     | --      | --      |
|         | SD   | 69.82  | 281.34 | 304.17  | 299.55  | 927.25  | 447.56  | --     | --      | --      |
|         | N    | 8      | 8      | 8       | 8       | 5       | 3       | --     | --      | --      |
| 1/CP    | Mean | 17.81  | 37.09  | 79.08   | 107.06  | 201.57  | 271.19  | 479.23 | 518.97  | 760.79  |
|         | SD   | 11.13  | 28.01  | 38.96   | 66.78   | 86.12   | 225.11  | 299.12 | 329.01  | 356.84  |
|         | N    | 8      | 8      | 8       | 8       | 8       | 8       | 8      | 8       | 8       |
| 1       | Mean | 14.57  | 16.24  | 62.24   | 97.86   | 280.07  | 354.46  | 607.71 | 724.63  | 947.07  |
|         | SD   | 4.62   | 9.51   | 38.84   | 81.32   | 201.13  | 242.27  | 366.28 | 538.45  | 595.92  |
|         | N    | 8      | 8      | 8       | 8       | 8       | 8       | 8      | 7       | 7       |
| 2/CP    | Mean | 20.7   | 48.52  | 110.64  | 201.16  | 310.19  | 543.60  | 915.12 | 1087.31 | 1403.21 |
|         | SD   | 4.18   | 16.39  | 31.16   | 107.85  | 86.42   | 364.11  | 623.39 | 670.98  | 741.07  |
|         | N    | 6      | 6      | 6       | 6       | 6       | 6       | 6      | 6       | 5       |
| 3/CP    | Mean | 14.41  | 30.96  | 71.58   | 99.73   | 186.98  | 379.67  | 666.53 | 907.11  | 1532.50 |
|         | SD   | 10.36  | 20.48  | 22.98   | 57.85   | 78.55   | 132.06  | 256.64 | 452.54  | 606.29  |
|         | N    | 6      | 6      | 6       | 6       | 6       | 6       | 6      | 6       | 6       |
| 4/CP    | Mean | 23.62  | 47.58  | 90.33   | 131.49  | 238.15  | 326.01  | 646.61 | 909.99  | 1321.60 |
|         | SD   | 12.00  | 35.27  | 54.52   | 83.05   | 145.61  | 177.16  | 421.08 | 576.67  | 832.17  |
|         | N    | 8      | 8      | 8       | 8       | 8       | 8       | 8      | 8       | 8       |
| 4       | Mean | 20.43  | 28.10  | 75.91   | 101.87  | 266.60  | 354.05  | 617.47 | 948.25  | 1250.21 |
|         | SD   | 14.25  | 21.14  | 64.96   | 86.79   | 235.92  | 317.63  | 535.63 | 888.01  | 1202.45 |
|         | N    | 8      | 8      | 8       | 8       | 8       | 8       | 8      | 8       | 8       |
| 5/AI/CP | Mean | 63.28  | 110.40 | 159.75  | 228.66  | 324.62  | 553.63  | 990.64 | 1623.35 | 1879.82 |
|         | SD   | 41.80  | 64.77  | 57.21   | 130.23  | 145.80  | 195.68  | 397.24 | 603.50  | 679.30  |
|         | N    | 8      | 8      | 8       | 8       | 8       | 8       | 8      | 7       | 6       |

**Table S27** Survival time (day) of each mouse

| PBS | PBS/CP | 1/CP | 1 | 2/CP | 3/CP | 4/CP | 4 | 5/AI/CP |
|-----|--------|------|---|------|------|------|---|---------|
|-----|--------|------|---|------|------|------|---|---------|

---

|   |    |    |    |    |    |    |    |    |    |
|---|----|----|----|----|----|----|----|----|----|
| 1 | 12 | 16 | 30 | 29 | 23 | 18 | 27 | 27 | 23 |
| 2 | 14 | 16 | 32 | 29 | 25 | 27 | 27 | 27 | 25 |
| 3 | 16 | 16 | 34 | 31 | 30 | 29 | 30 | 29 | 27 |
| 4 | 16 | 18 | 34 | 34 | 30 | 30 | 32 | 31 | 27 |
| 5 | 16 | 18 | 34 | 36 | 34 | 30 | 36 | 34 | 29 |
| 6 | 18 | 19 | 41 | 36 | 41 | 32 | 39 | 34 | 29 |
| 7 | 18 | 20 | 43 | 36 | -- | -- | 41 | 34 | 31 |
| 8 | 18 | 20 | 48 | 43 | -- | -- | 42 | 36 | 31 |

---

## References

- 1 V. A. Sarpe and S. S. Kulkarni, *Org. Biomol. Chem.*, 2013, **11**, 6460–6465.
- 2 H. Yamamoto, M. Oda, M. Nakano, N. Watanabe, K. Yabiku, M. Shibutani, M. Inoue, H. Imagawa, M. Nagahama, S. Himeno, K. Setsu, J. Sakurai and M. Nishizawa, *J. Med. Chem.*, 2013, **56**, 381–385.
- 3 J. Wu and Z. Guo, *Bioconjug. Chem.*, 2006, **17**, 1537–1544.
- 4 Q. Wang, S. A. Ekanayaka, J. Wu, J. Zhang and Z. Guo, *Bioconjug. Chem.*, 2008, **19**, 2060–2067.
- 5 D. V. Zinov'ev and P. Sole, *Probl. Peredachi Informatsii*, 2004, **40**, 50–62.
- 6 L. Svennerholm, *Biochim. Biophys. Acta*, 1957, **24**, 604–611.

# NMR and MS Spectra of Synthesized Compounds

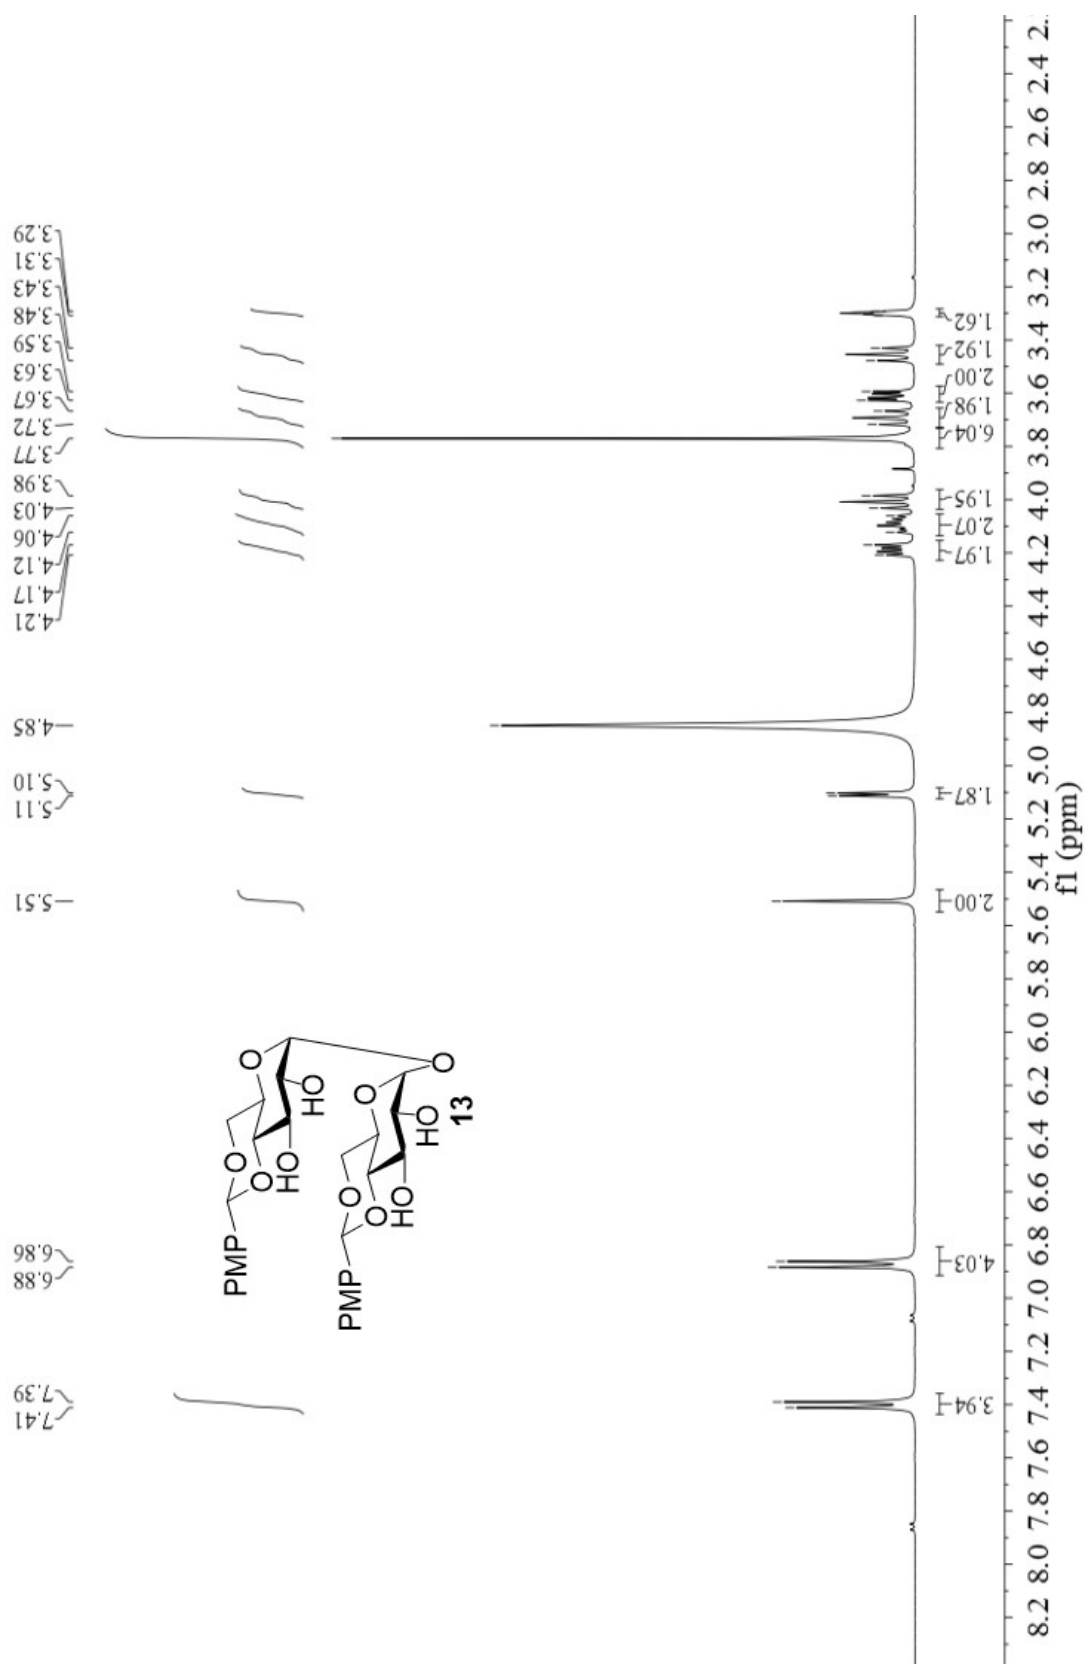

$^1\text{H}$  NMR Spectrum of compound **13** ( $\text{CDCl}_3$ , 400 MHz)

Spectrum from LWW-6.wiff (sample 1) - LWW-6, +TOF MS (100 - 3000) from 0.790 min

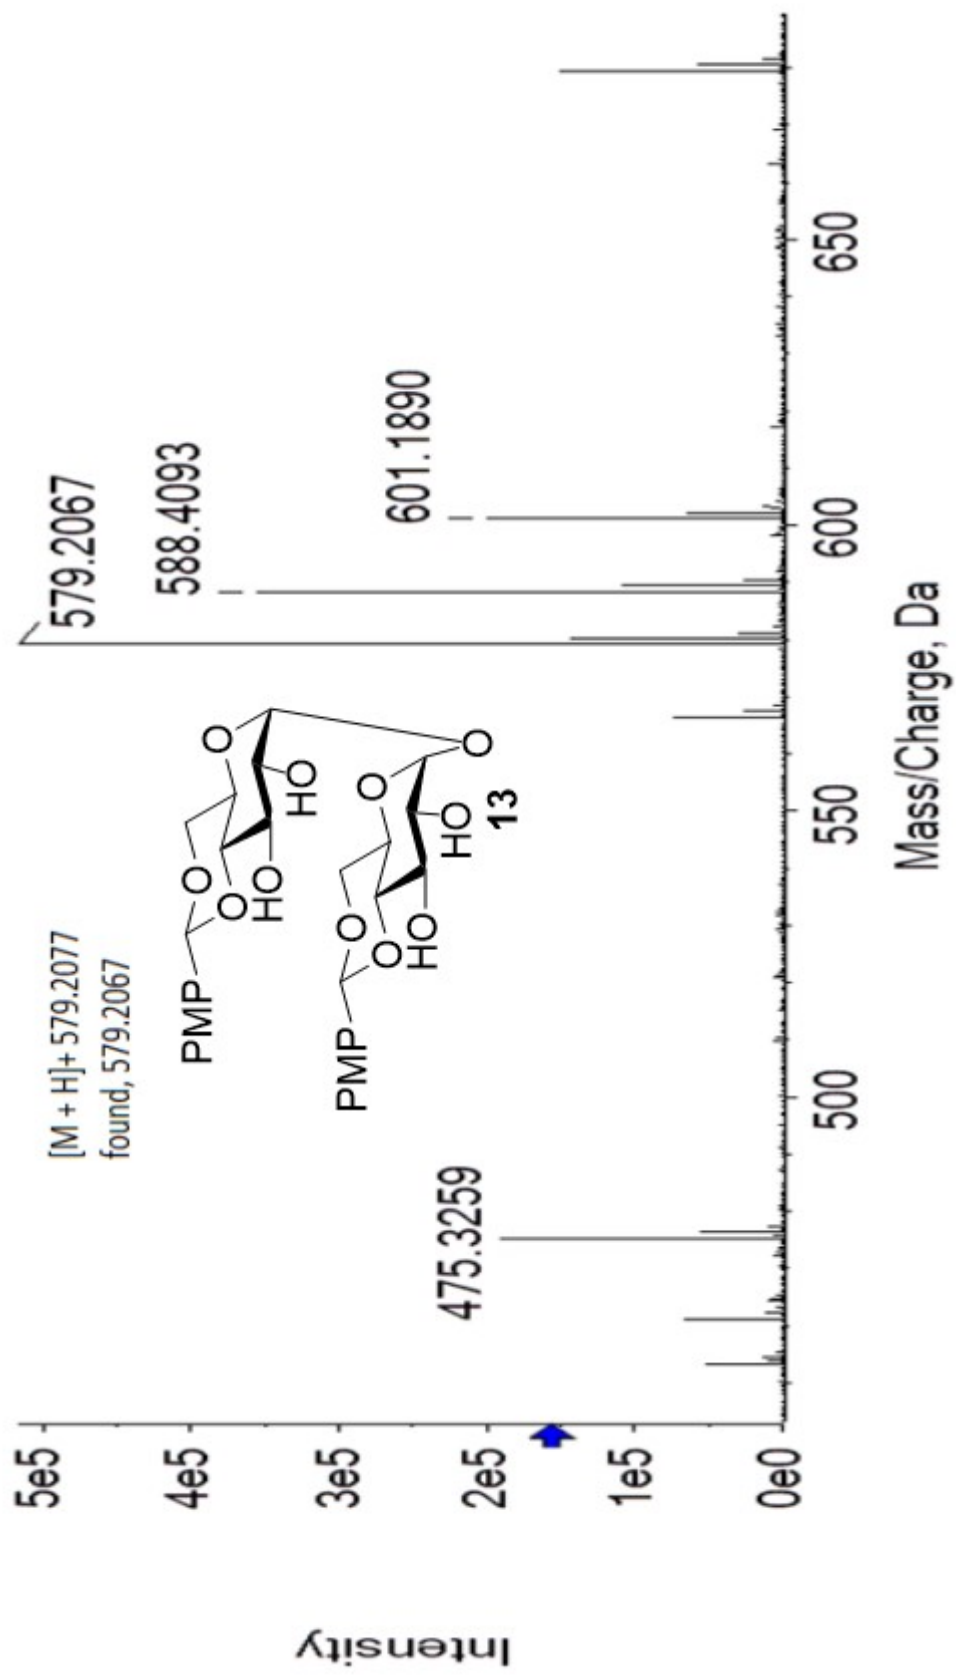

HR-ESI-MS spectrum of conjugate 13

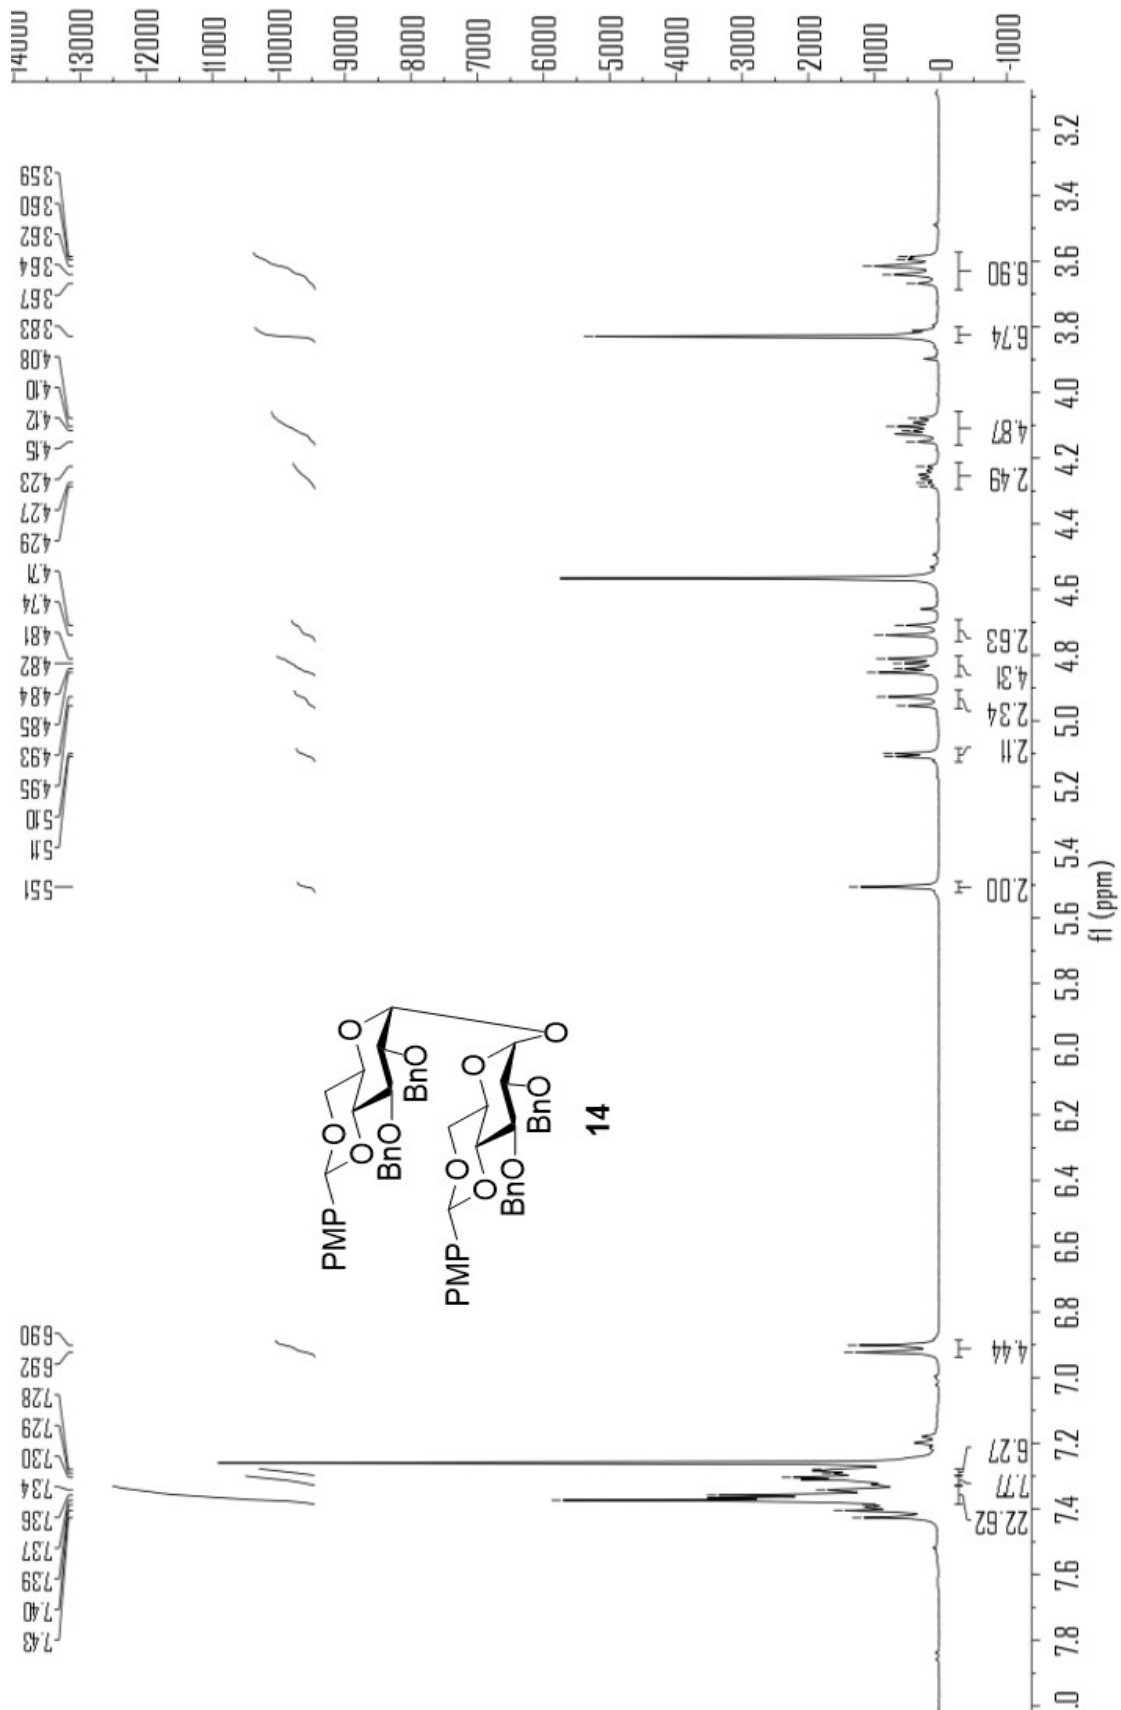

<sup>1</sup>H NMR Spectrum of compound **14** (CDCl<sub>3</sub>, 400 MHz)

Spectrum from LWW-9.wiff (sample 1) - LWW-9, +TOF MS (100 - 3000) from 3.841 to 3.846 min

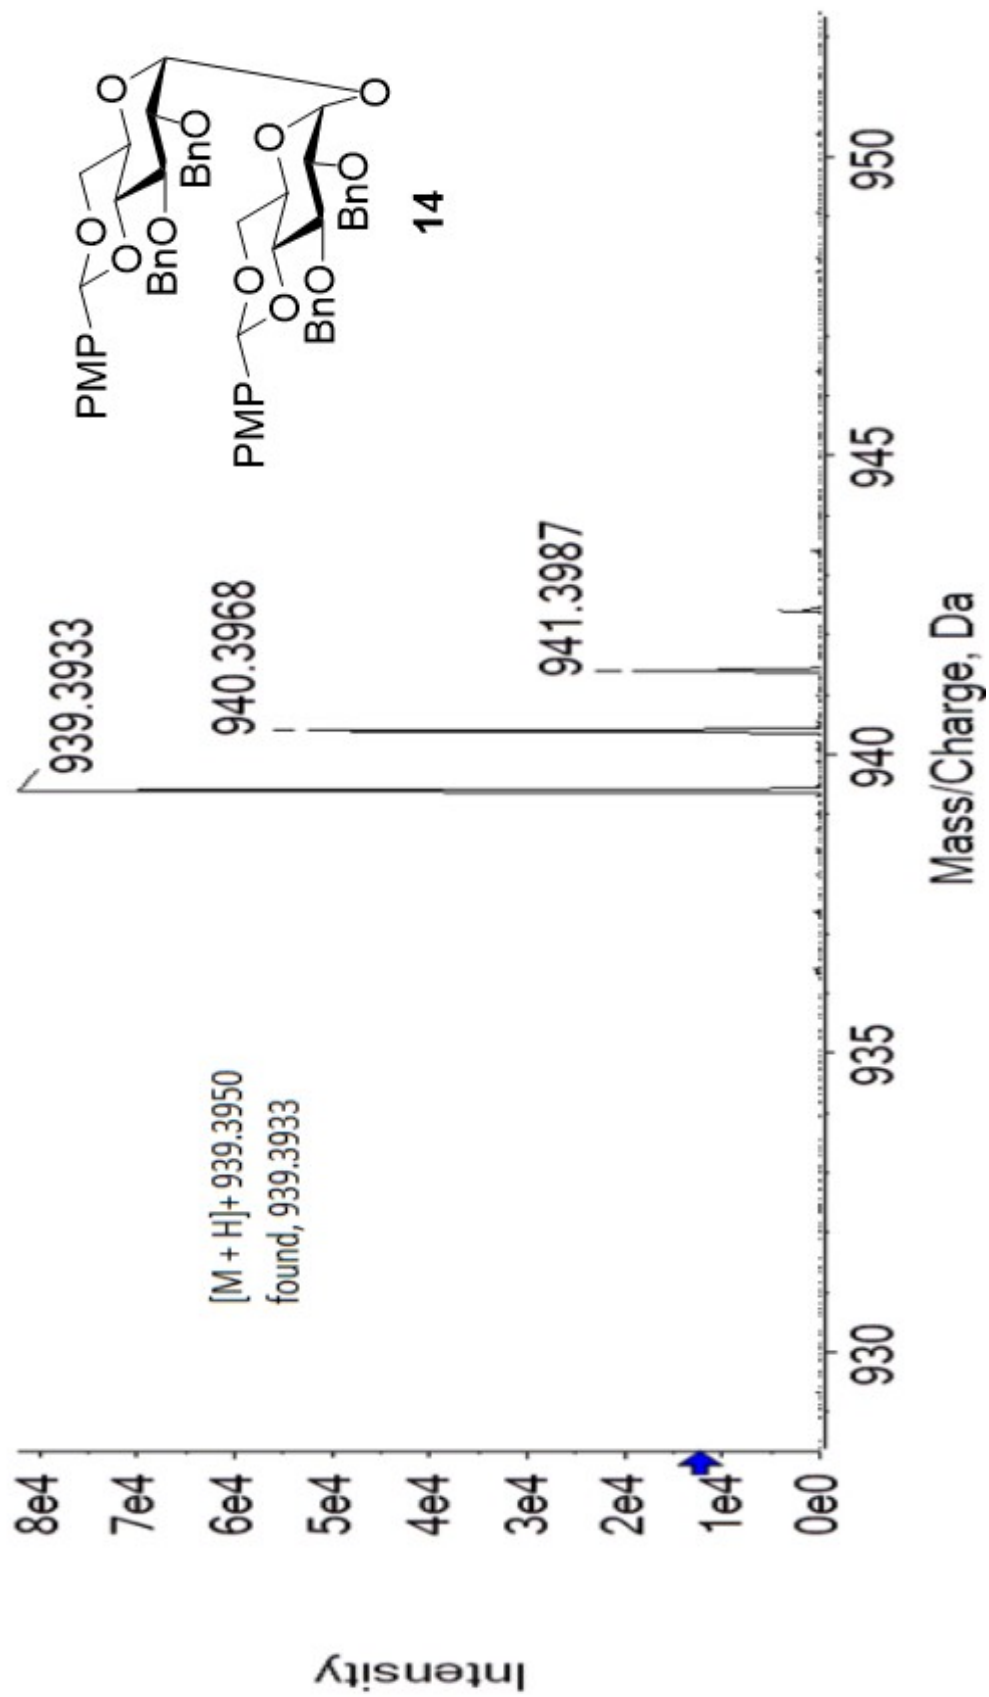

HR-ESI-MS spectrum of conjugate 14





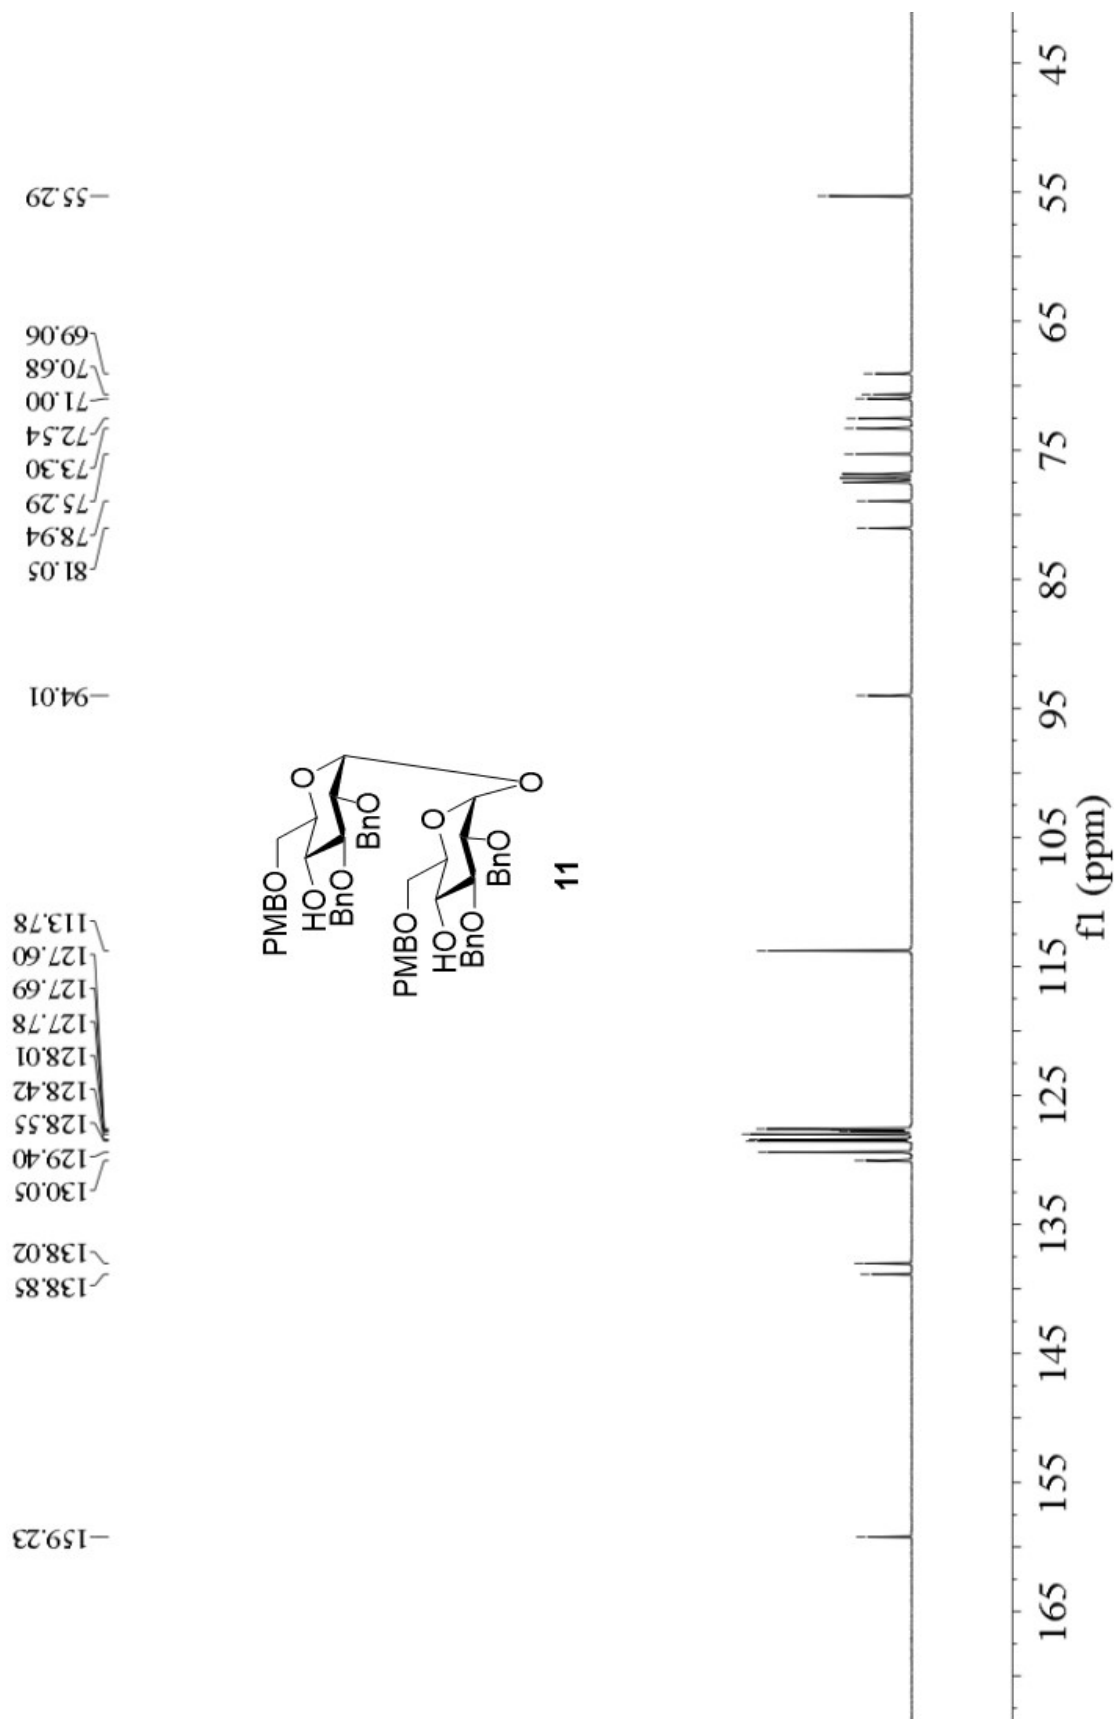

<sup>13</sup>C NMR Spectrum of compound **11** (CDCl<sub>3</sub>, 400 MHz)

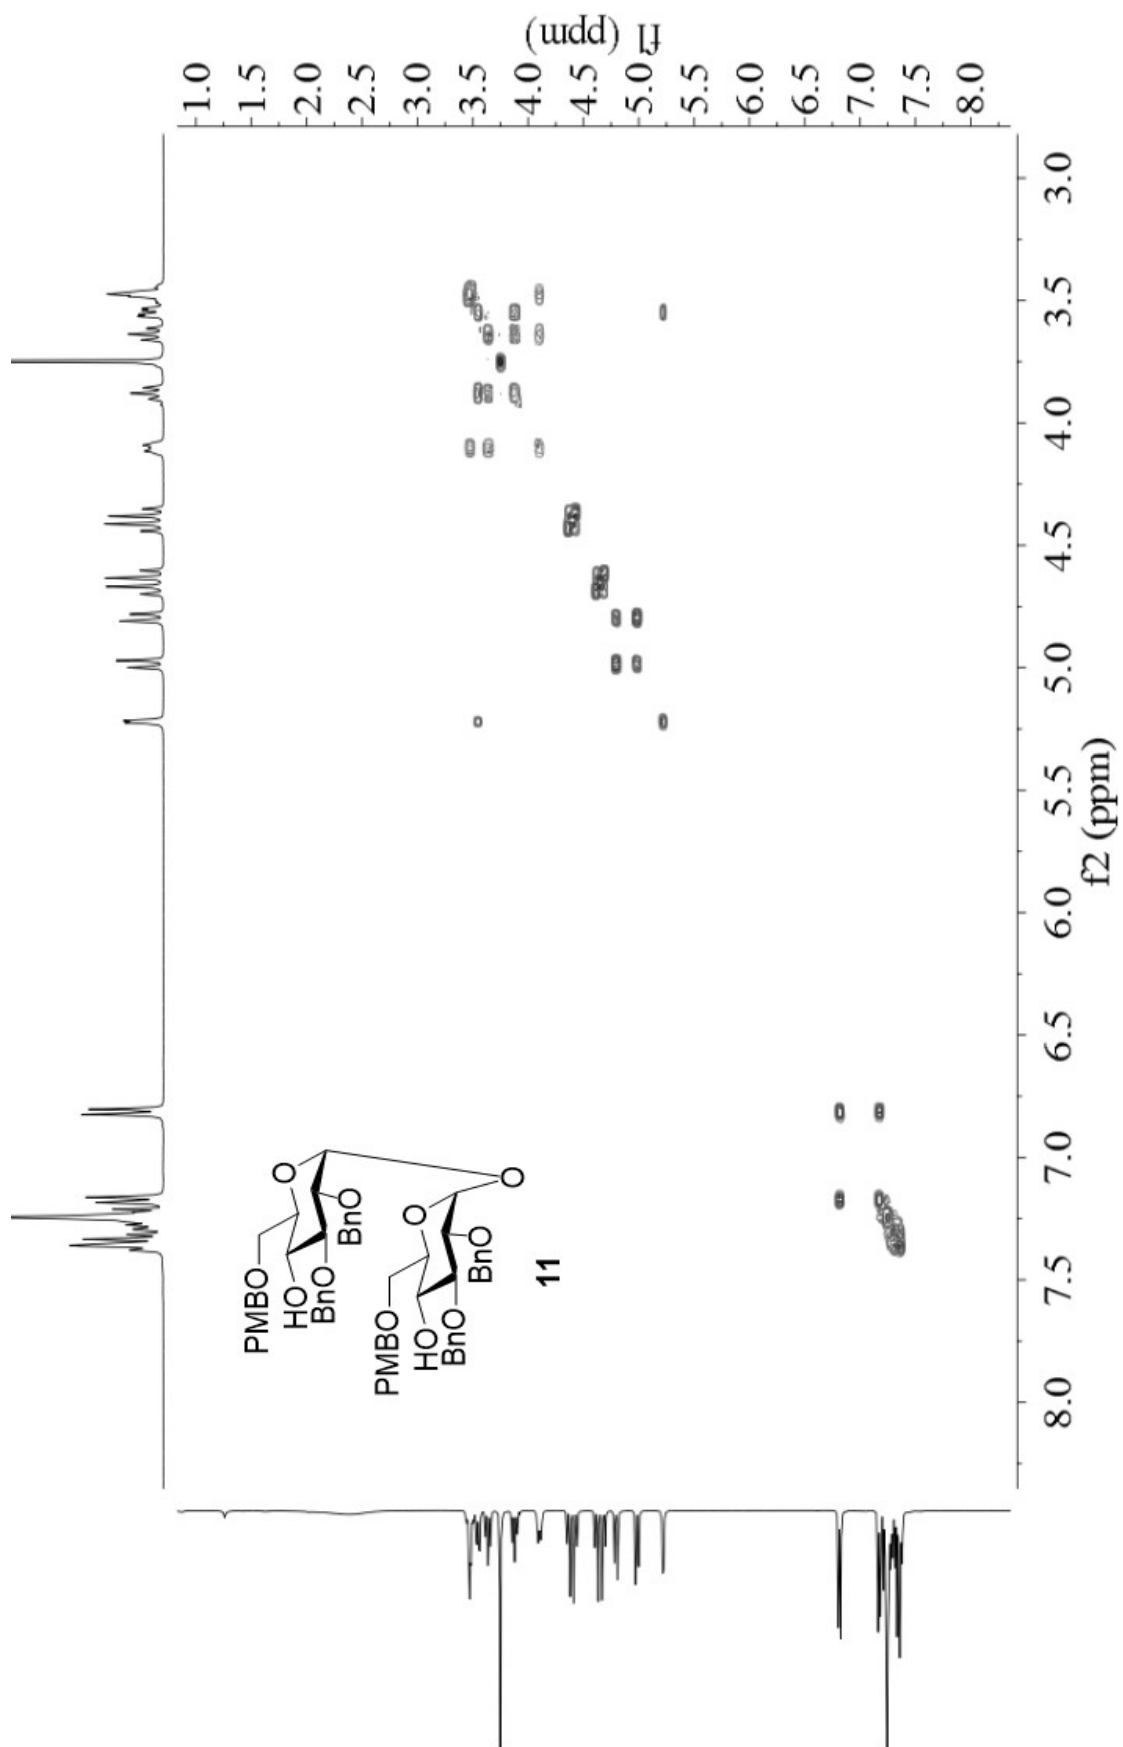

$^1\text{H}$ - $^1\text{H}$  COSY NMR Spectrum of compound **11** ( $\text{CDCl}_3$ , 400 MHz)

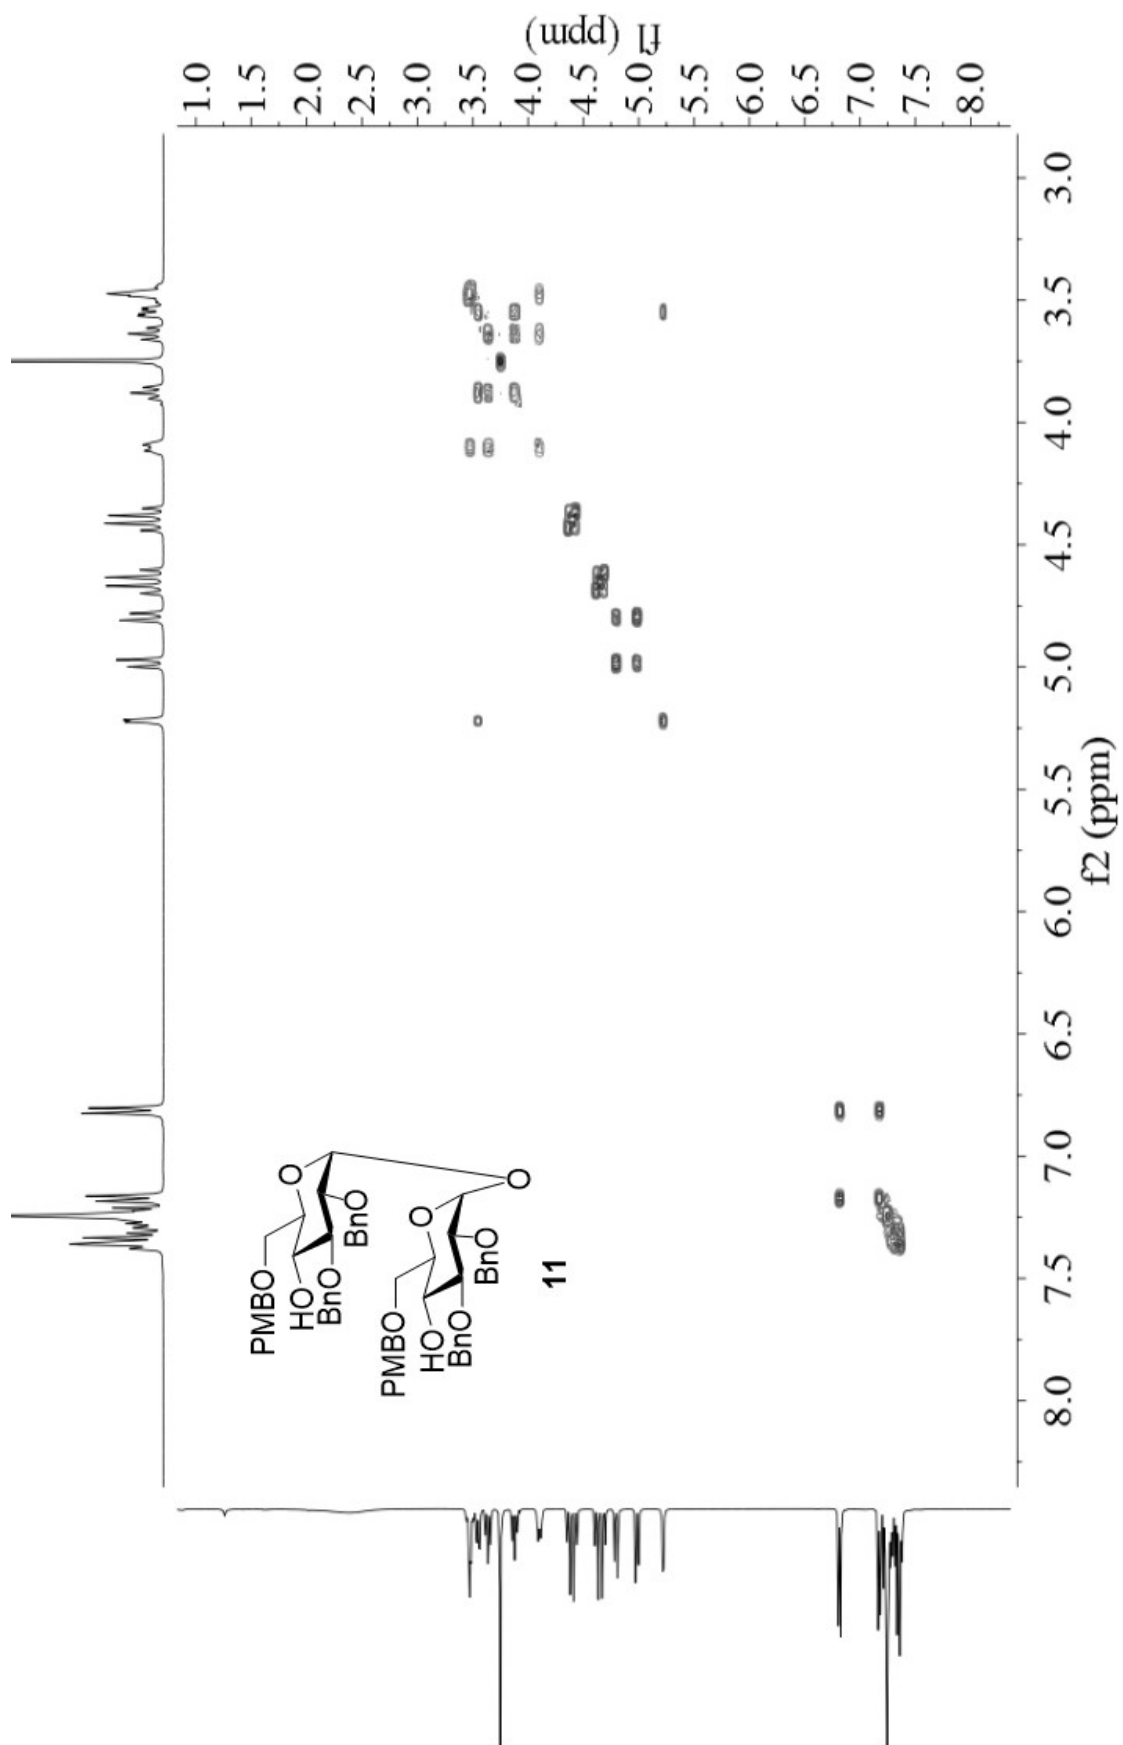

HSQC NMR Spectrum of compound **11** (CDCl<sub>3</sub>, 400 MHz)

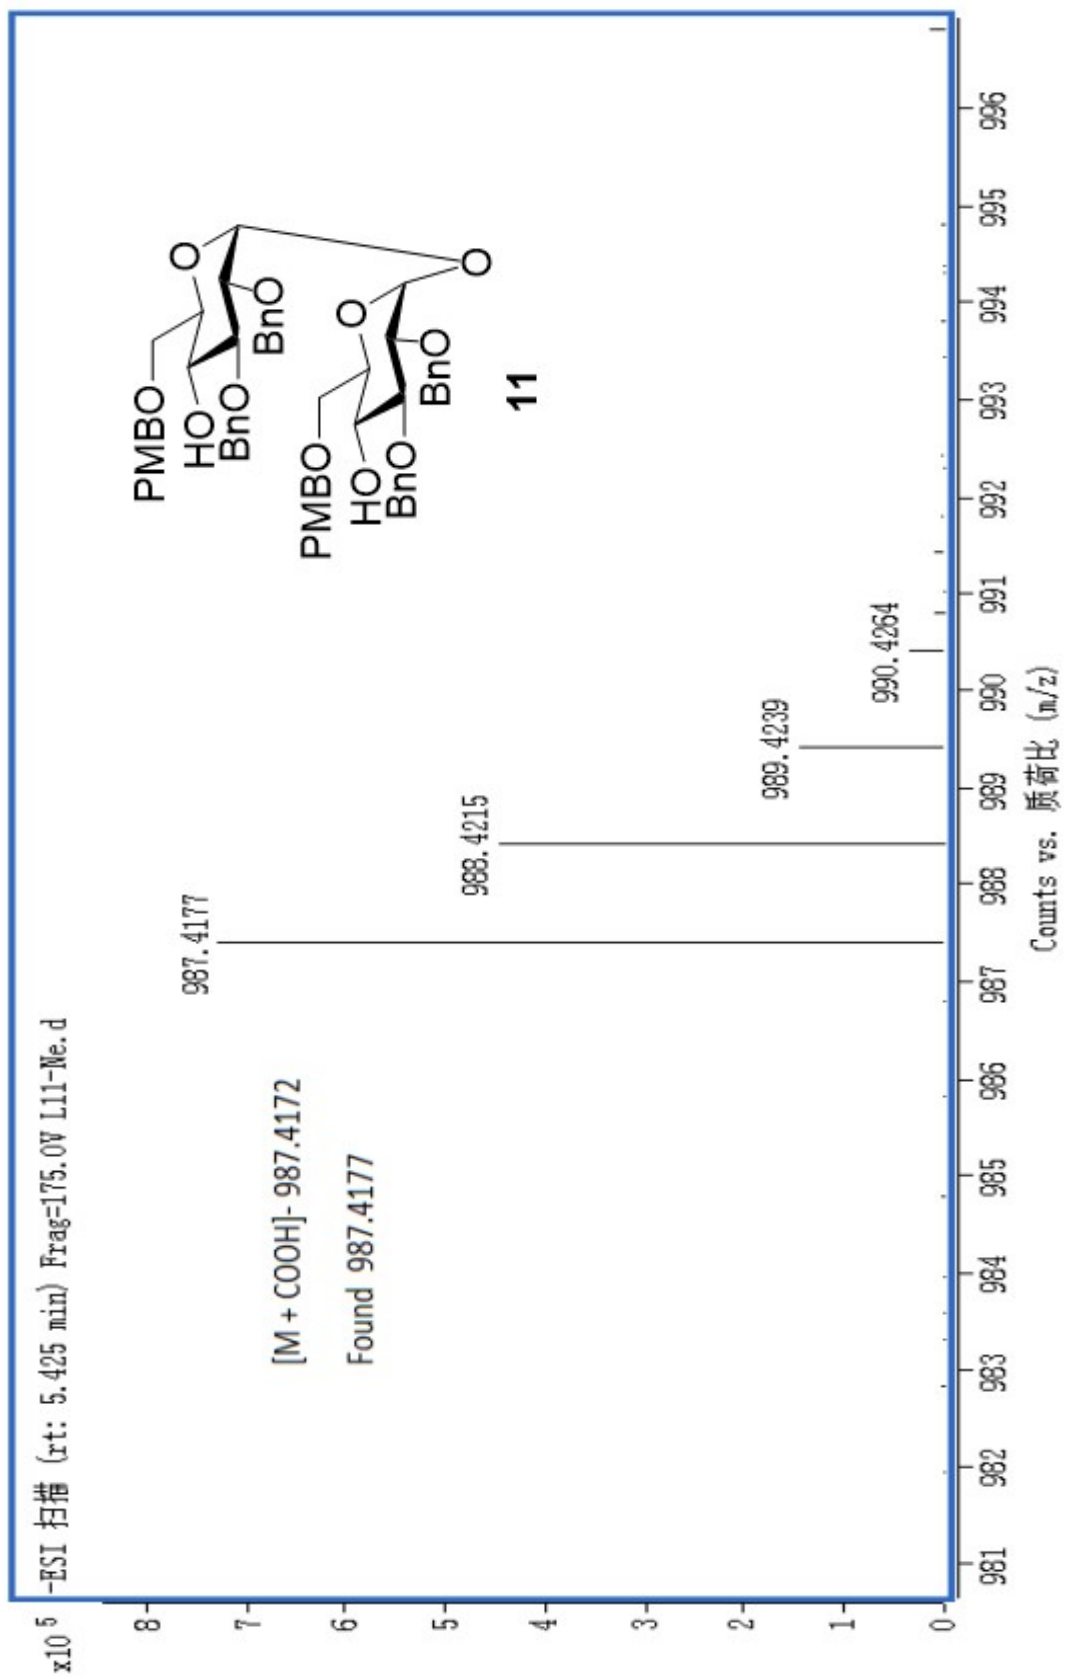

HR-ESI-MS spectrum of conjugate **11**

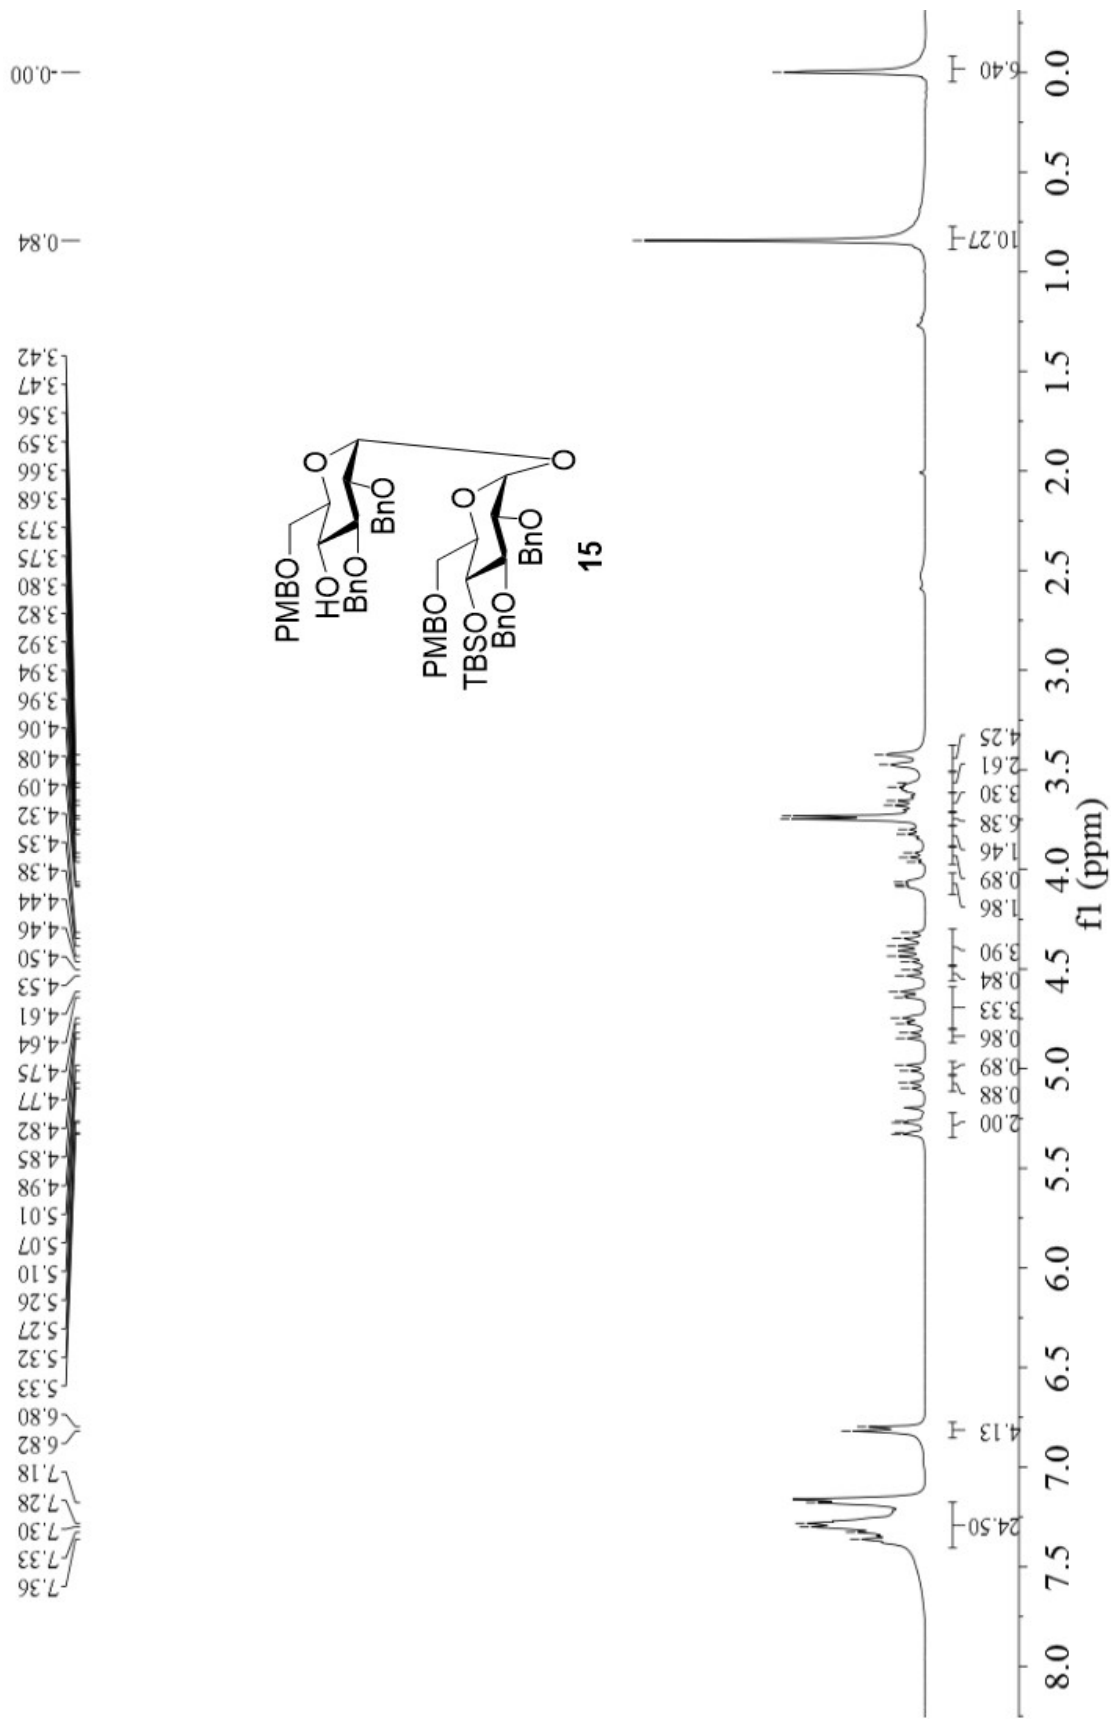

<sup>1</sup>H NMR Spectrum of compound **15** (CDCl<sub>3</sub>, 400 MHz)

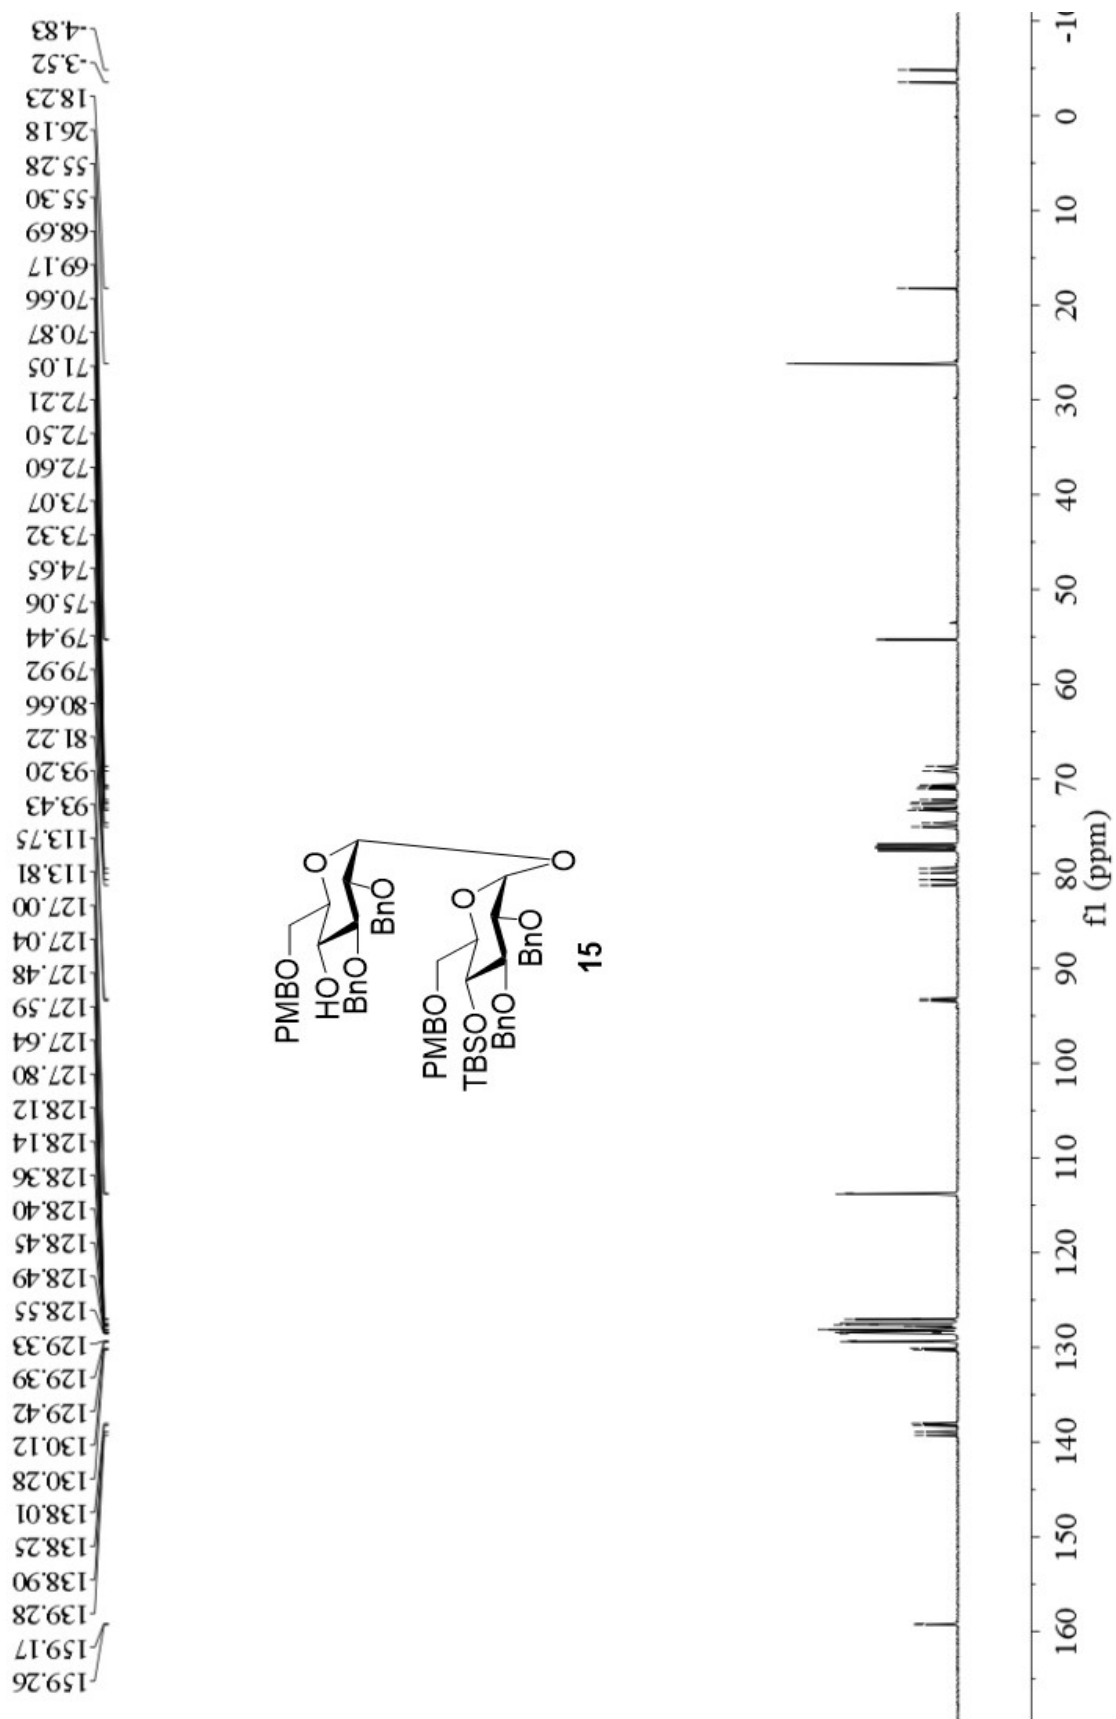

<sup>13</sup>C NMR Spectrum of compound 15 (CDCl<sub>3</sub>, 400 MHz)

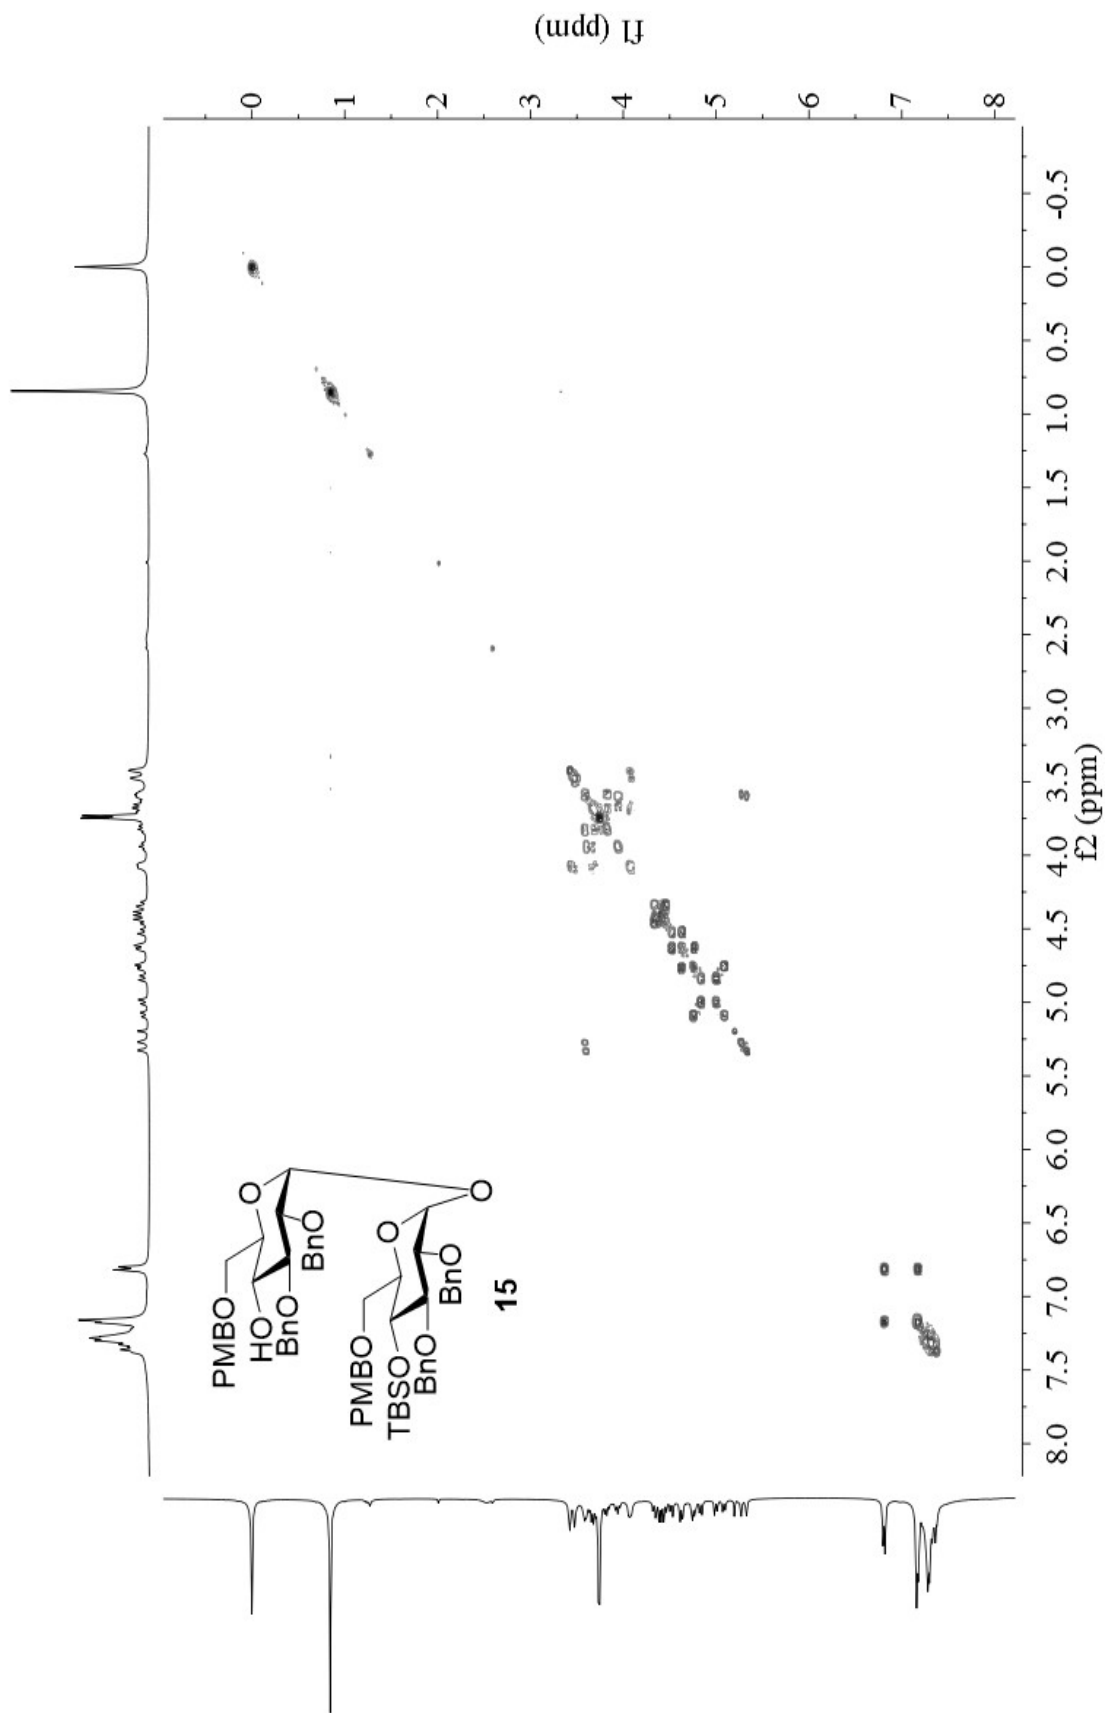

$^1\text{H}$ - $^1\text{H}$  COSY NMR Spectrum of compound **15** ( $\text{CDCl}_3$ , 400 MHz)

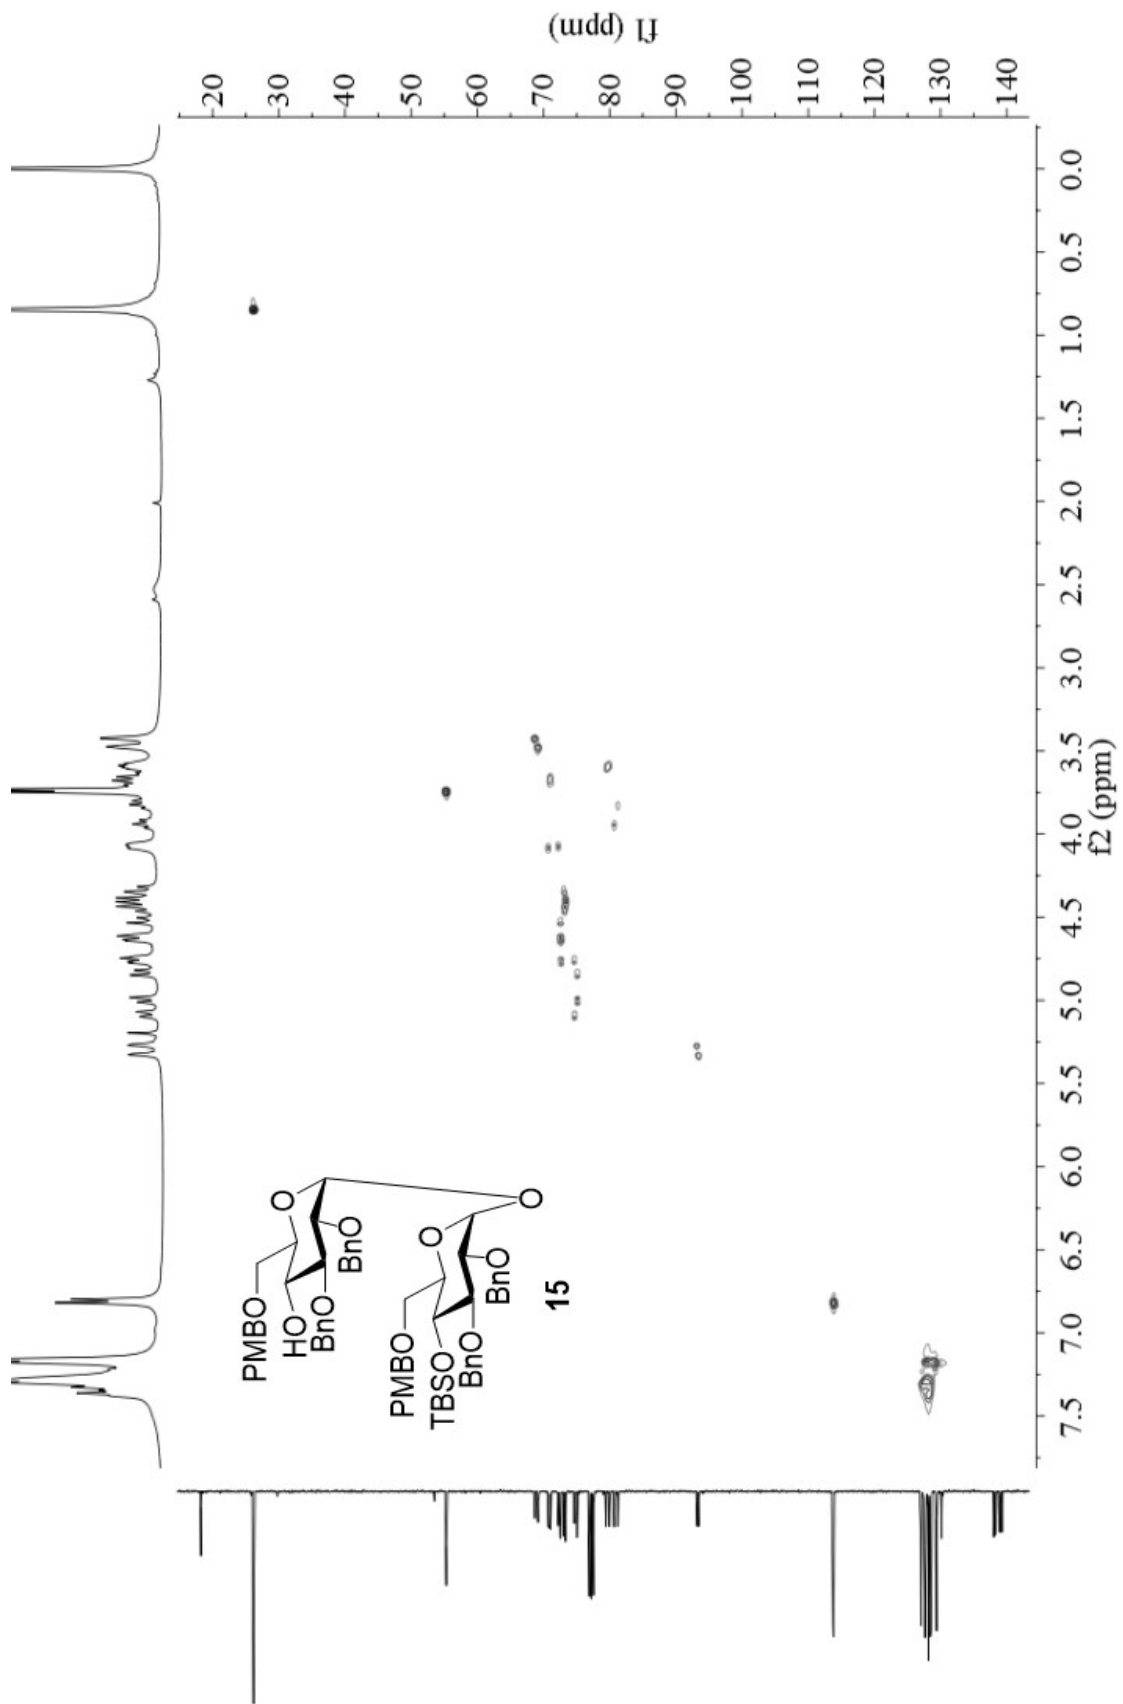

HSQC NMR Spectrum of compound **15** ( $\text{CDCl}_3$ , 400 MHz)



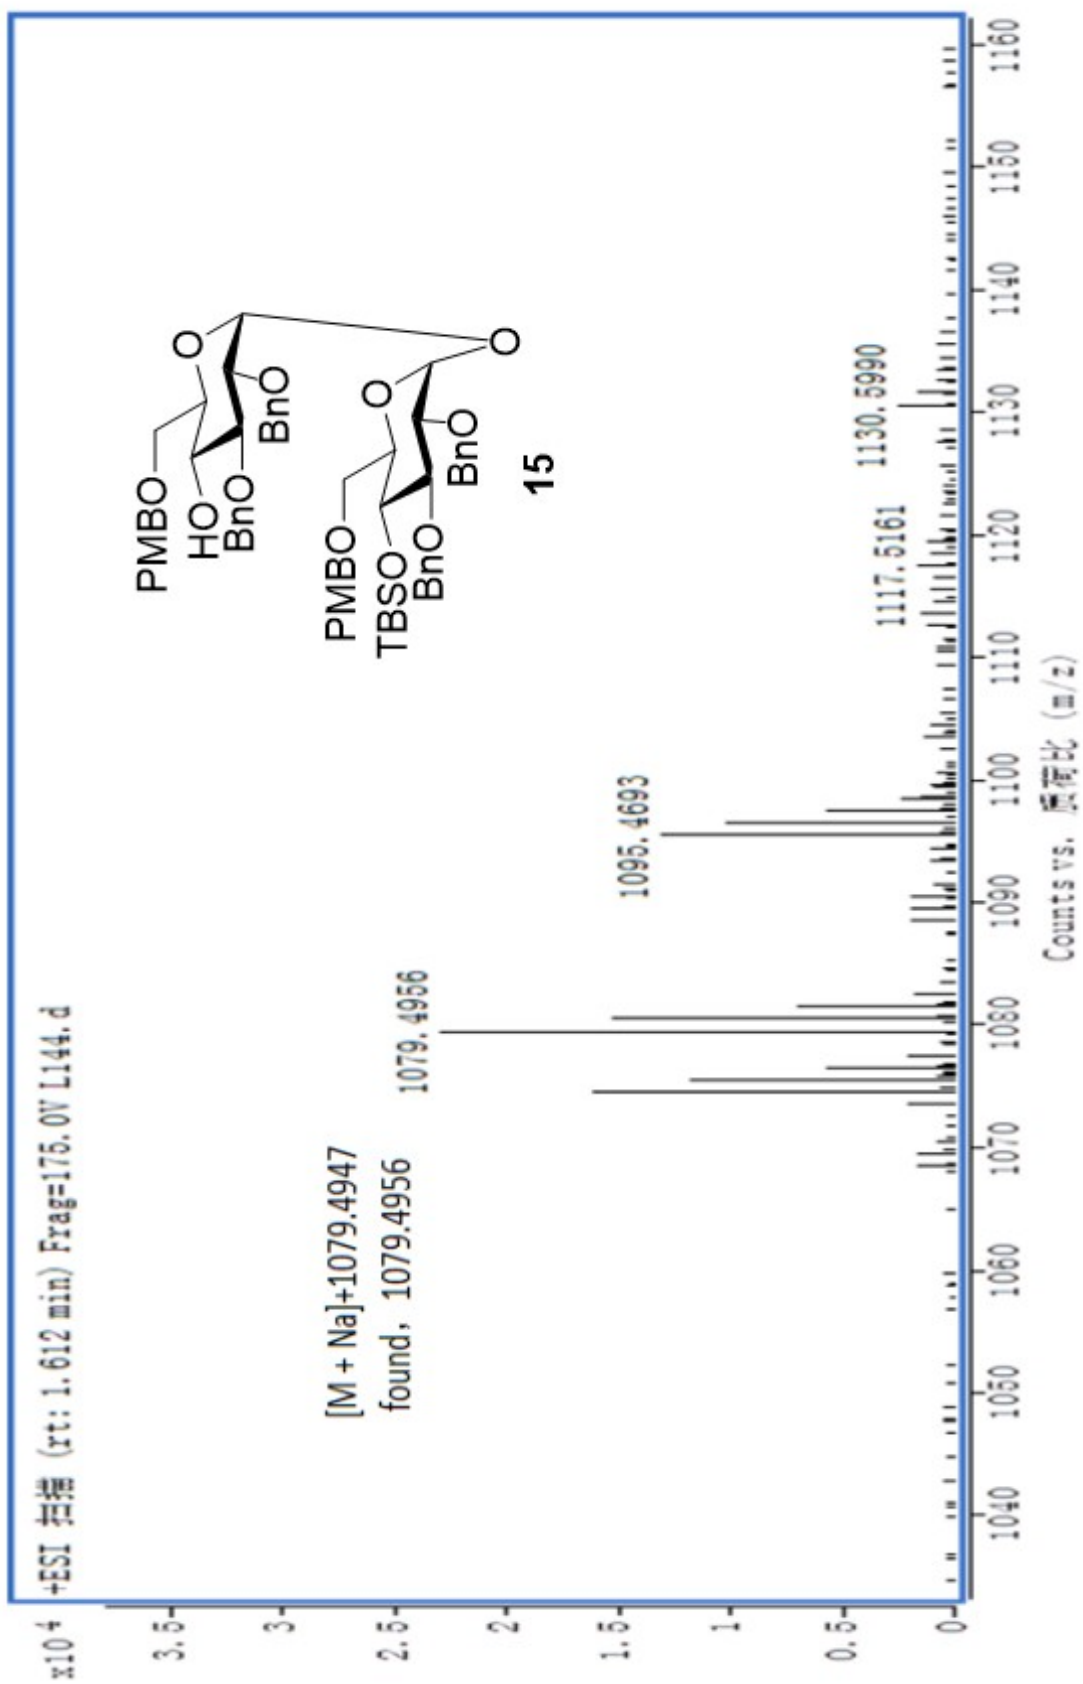

HR-ESI-MS spectrum of conjugate **15**

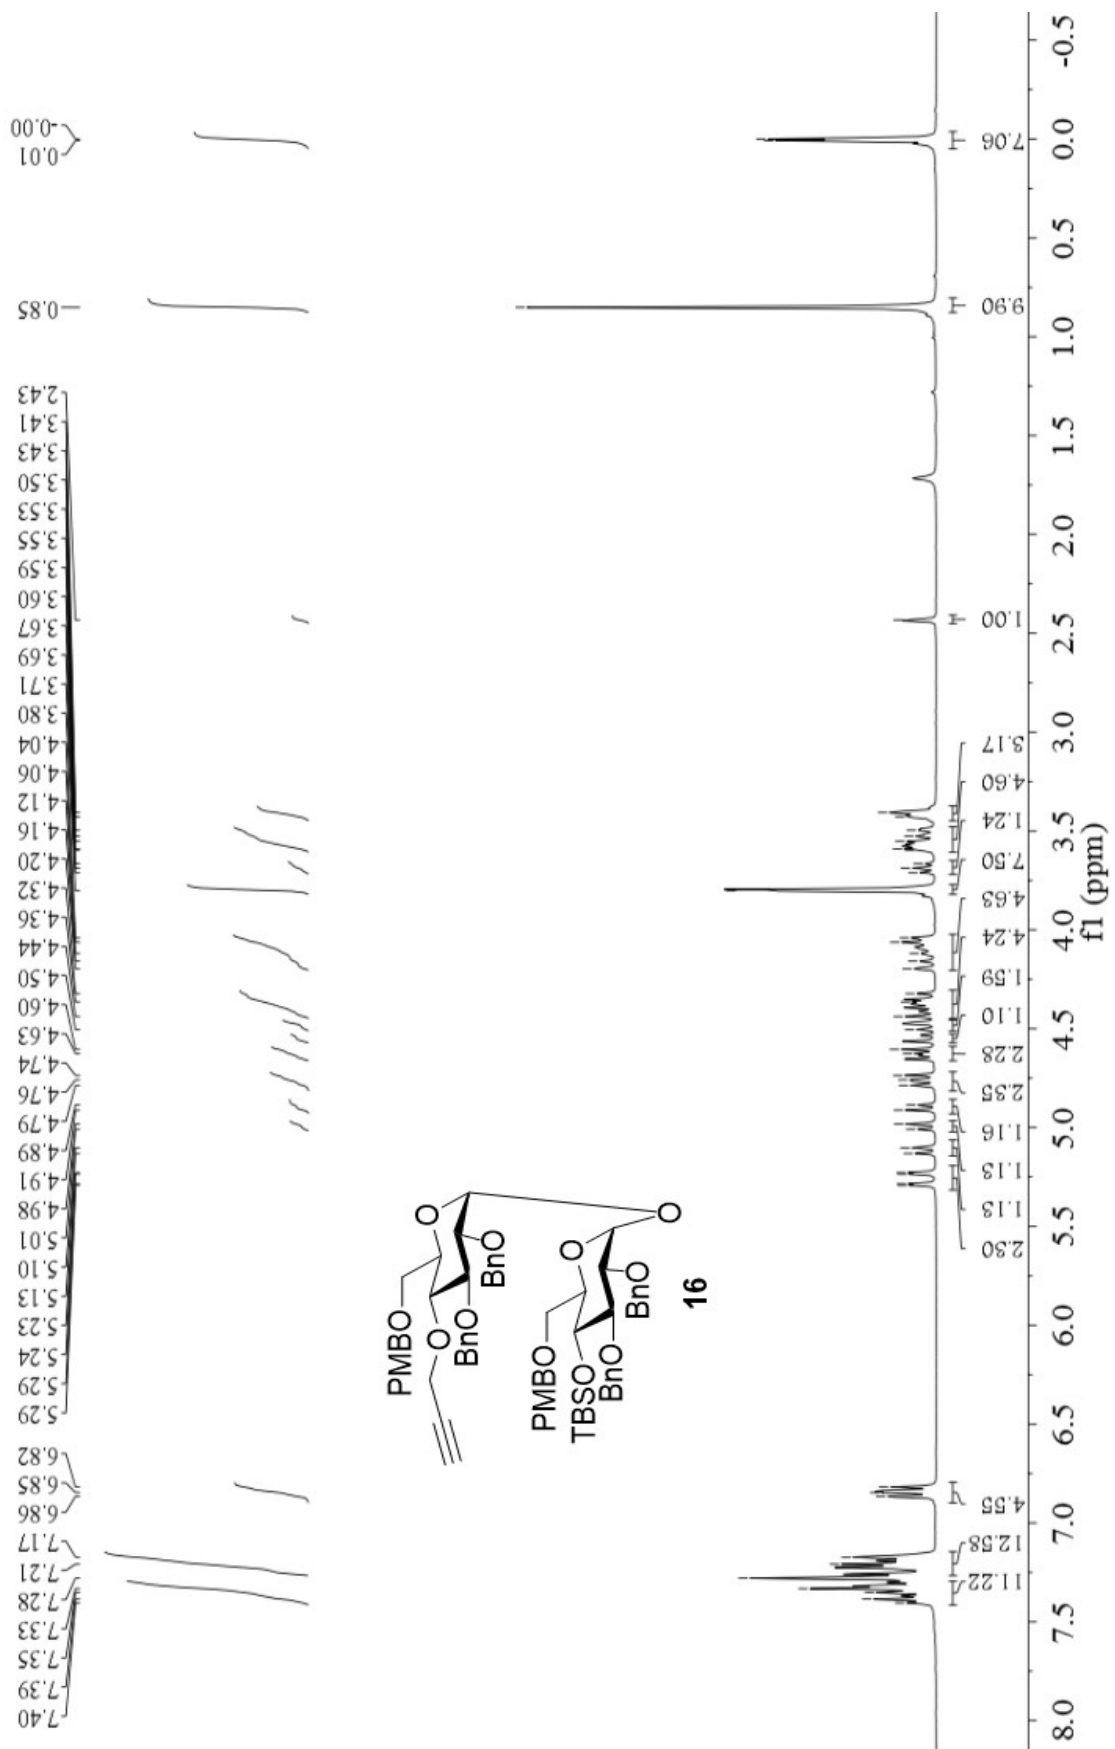

<sup>1</sup>H NMR Spectrum of compound **16** (CDCl<sub>3</sub>, 400 MHz)

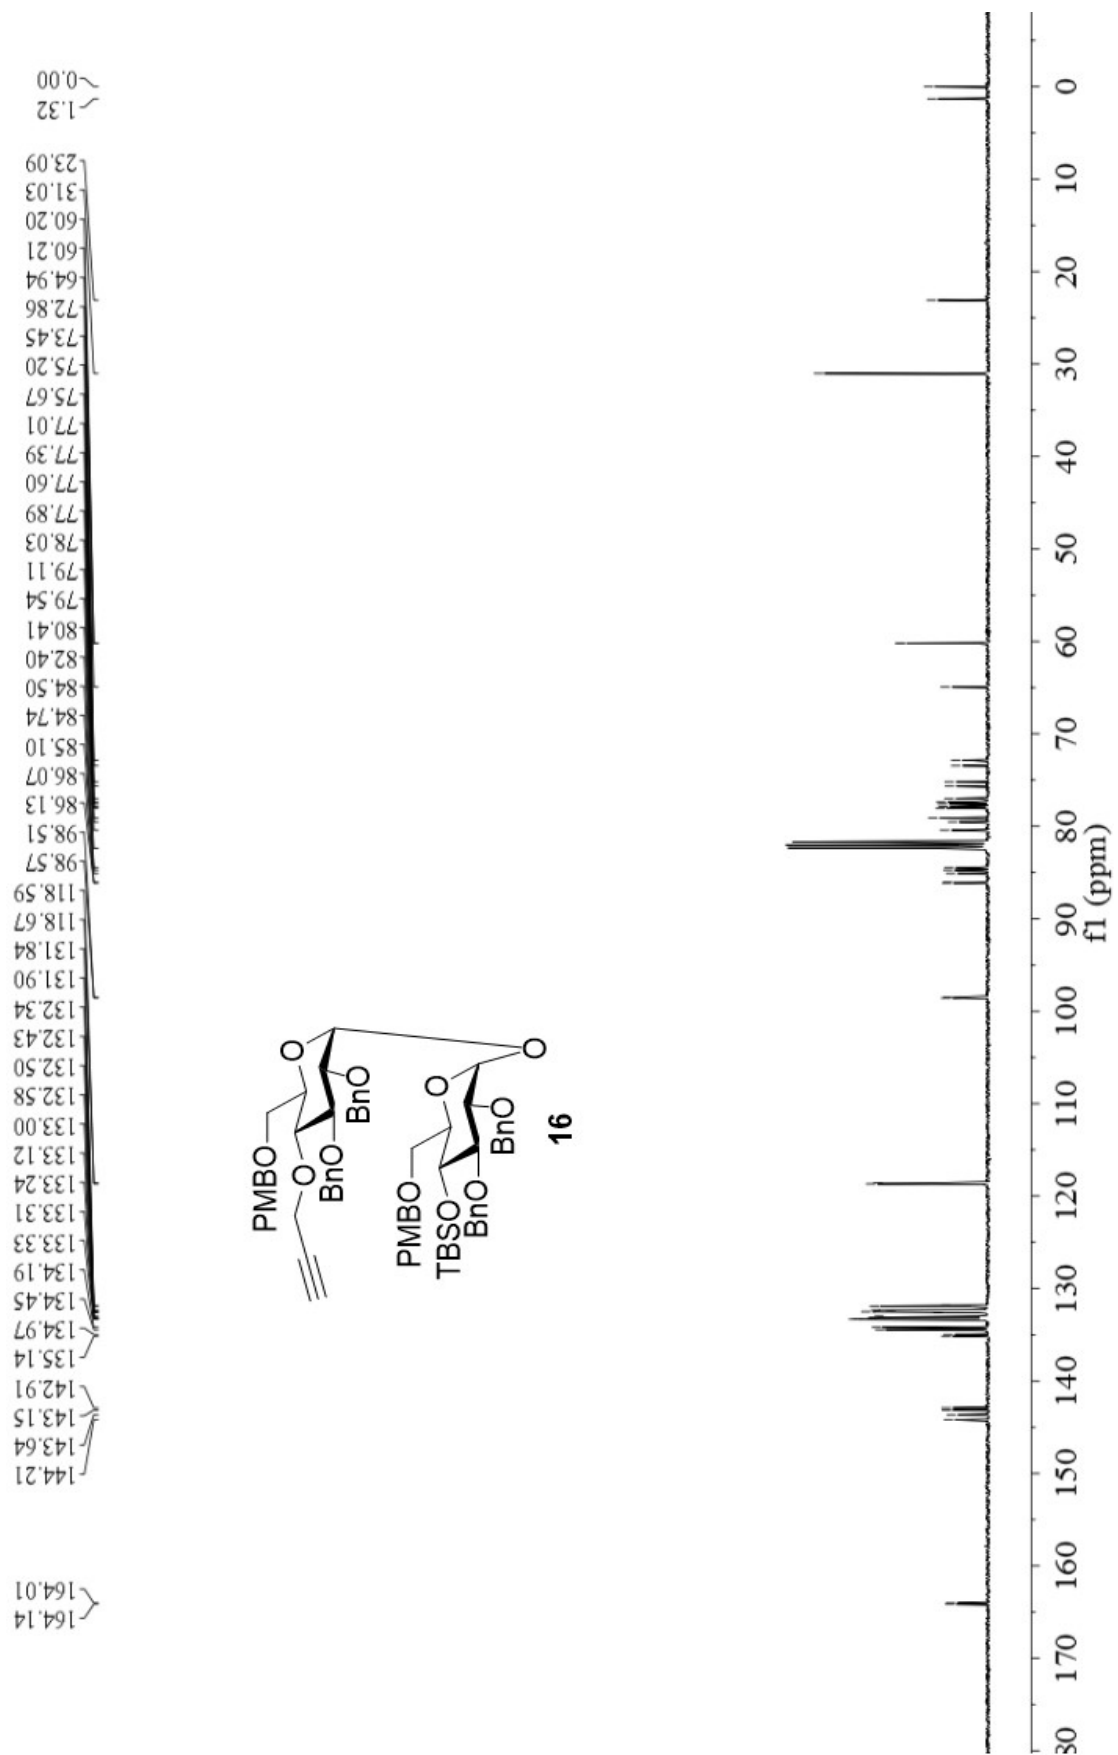

<sup>13</sup>C NMR Spectrum of compound **16** (CDCl<sub>3</sub>, 100 MHz)

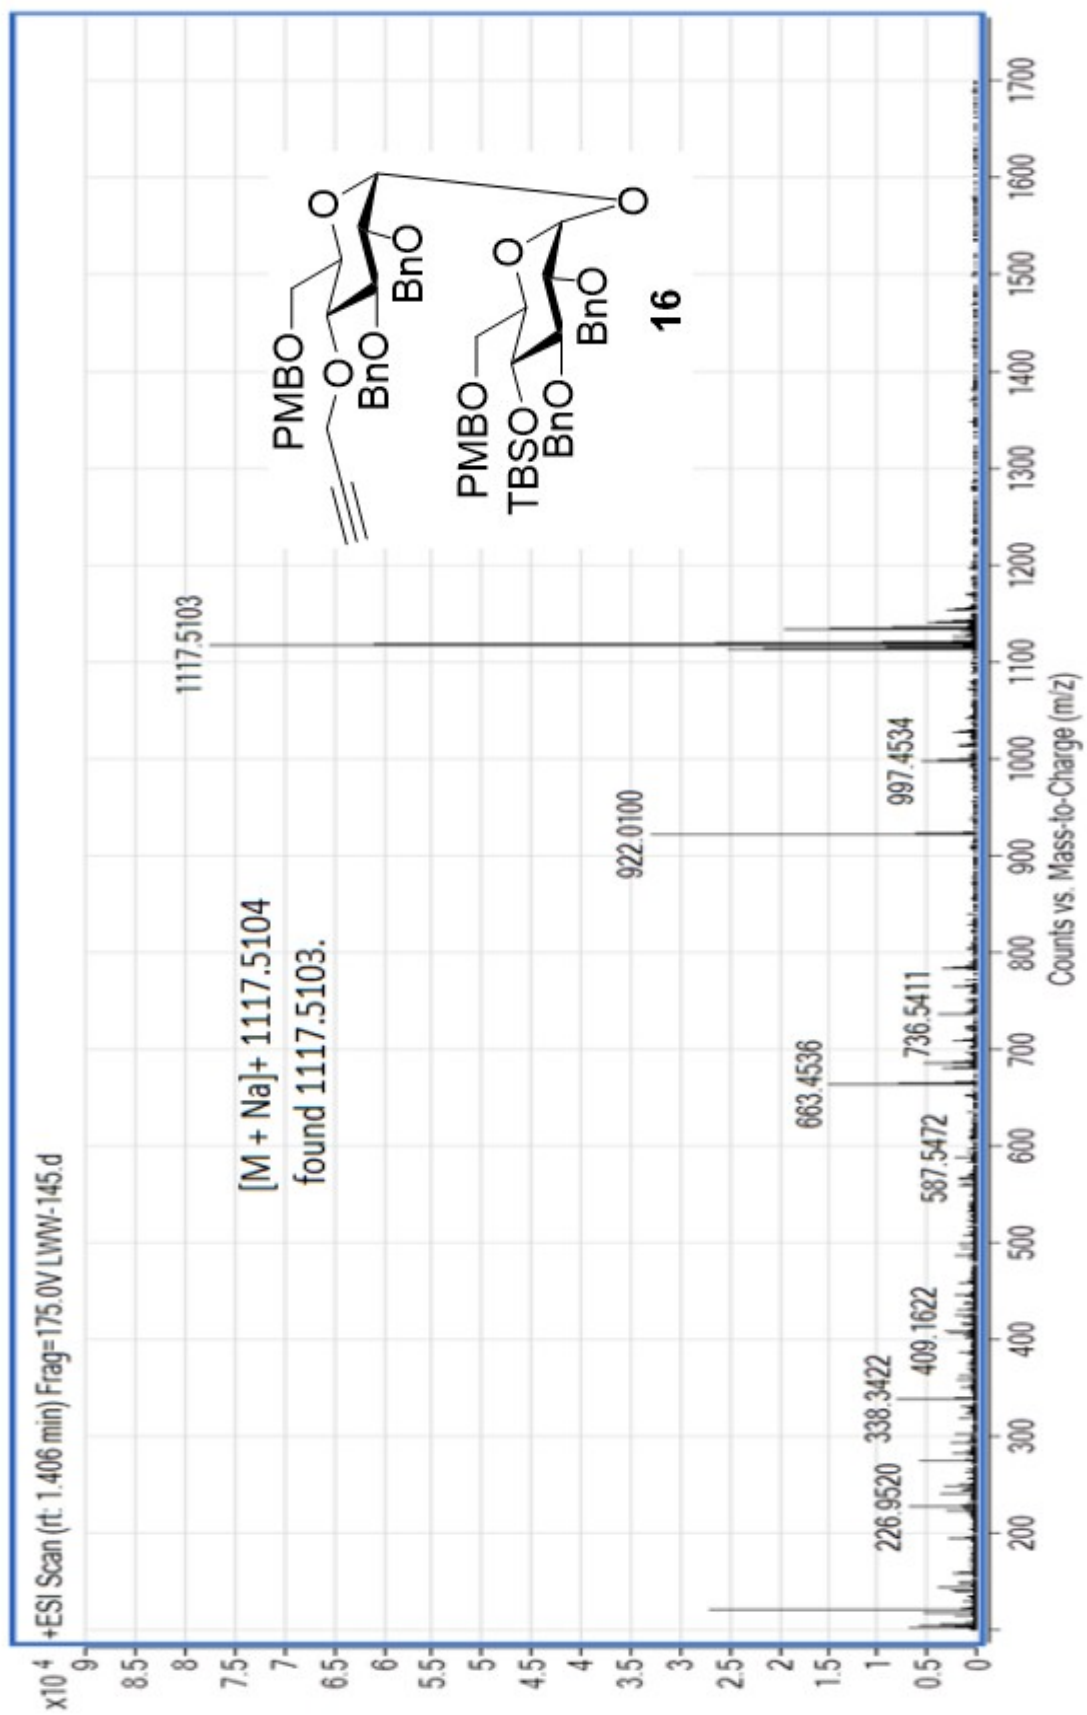

HR-ESI-MS spectrum of conjugate **16**

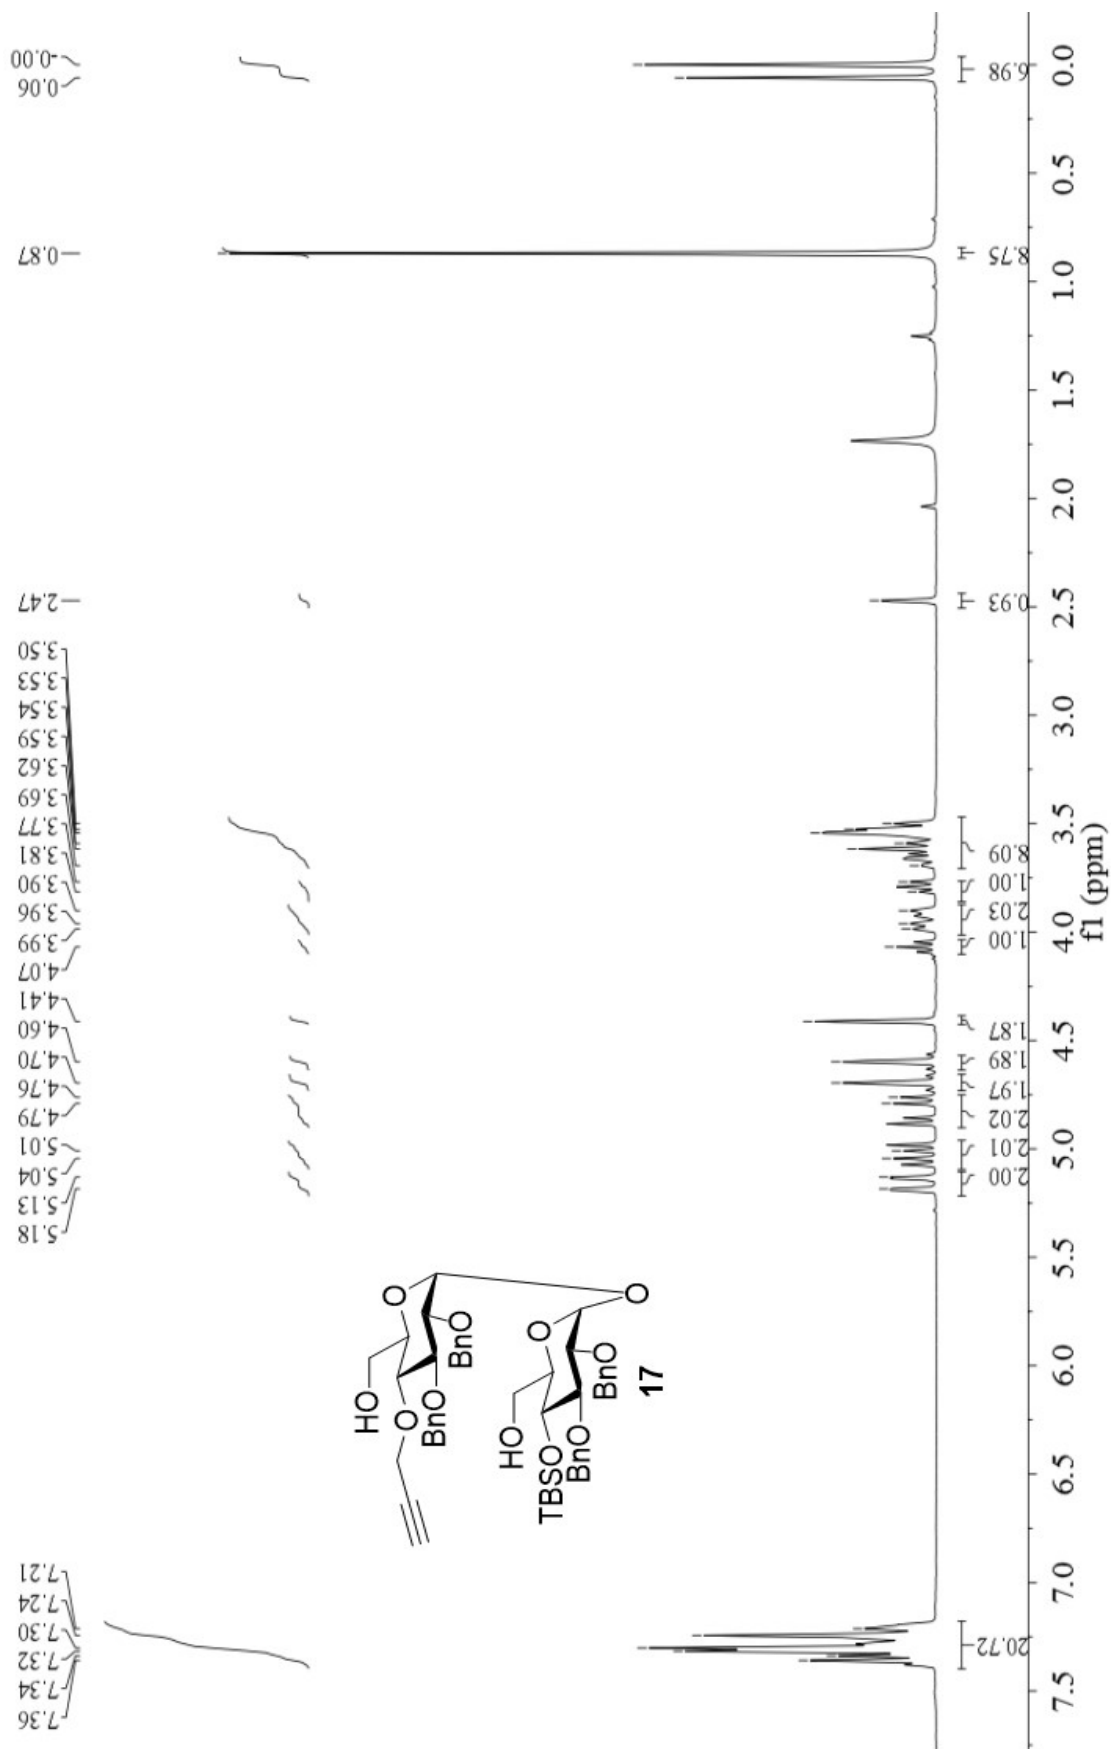

<sup>1</sup>H NMR Spectrum of compound **17** (CDCl<sub>3</sub>, 400 MHz)

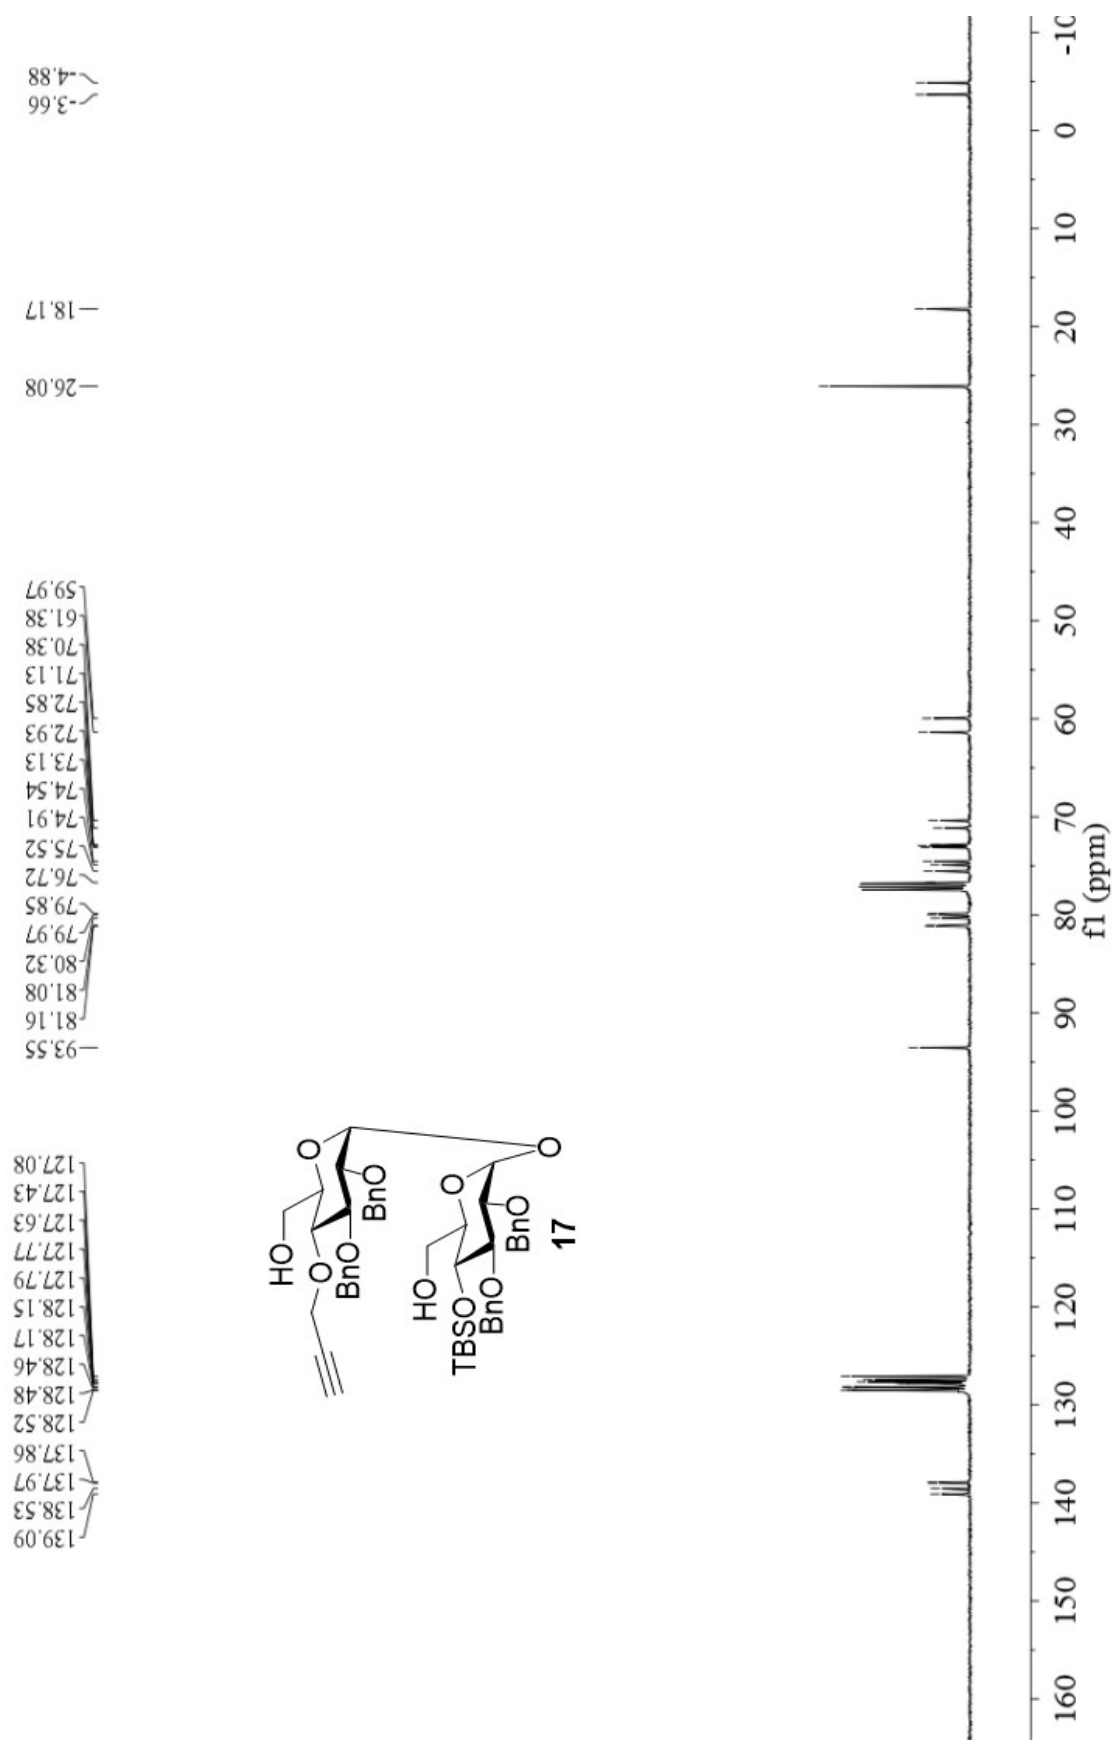

<sup>13</sup>C NMR Spectrum of compound 17 (CDCl<sub>3</sub>, 400 MHz)

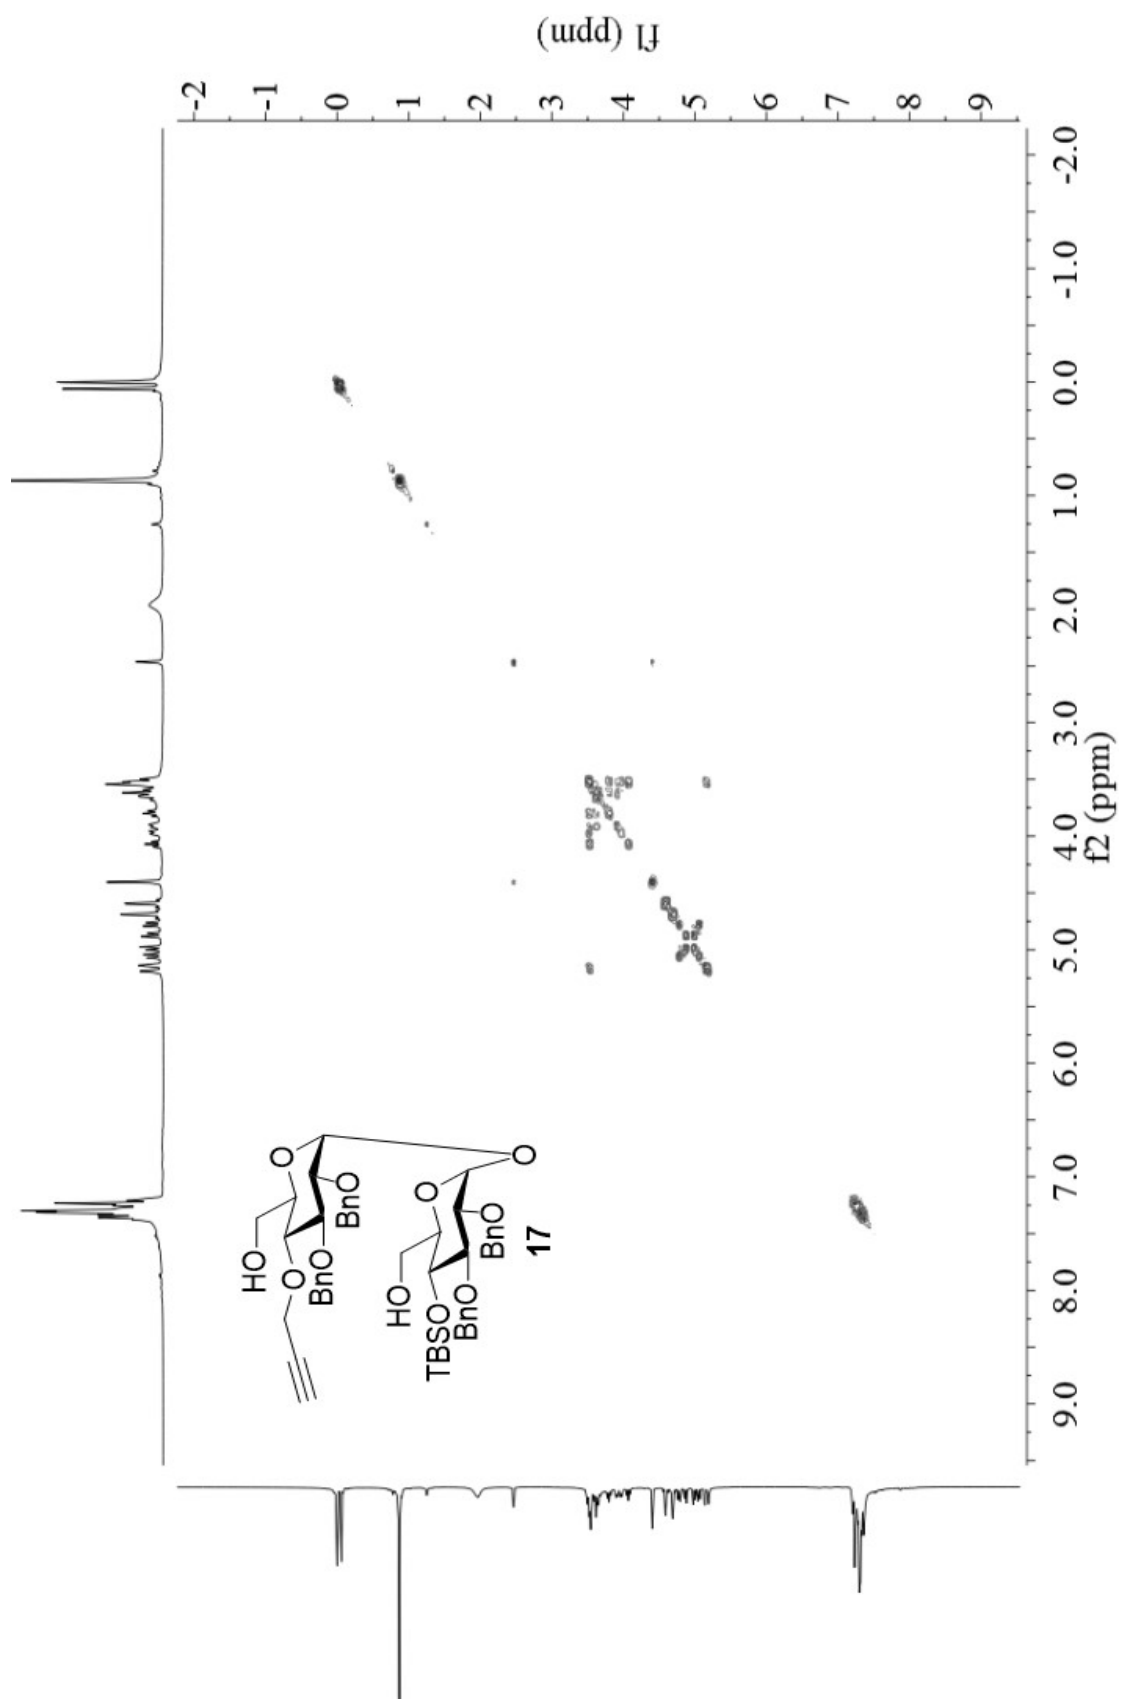

$^1\text{H}$ - $^1\text{H}$  COSY NMR Spectrum of compound **17** ( $\text{CDCl}_3$ , 400 MHz)

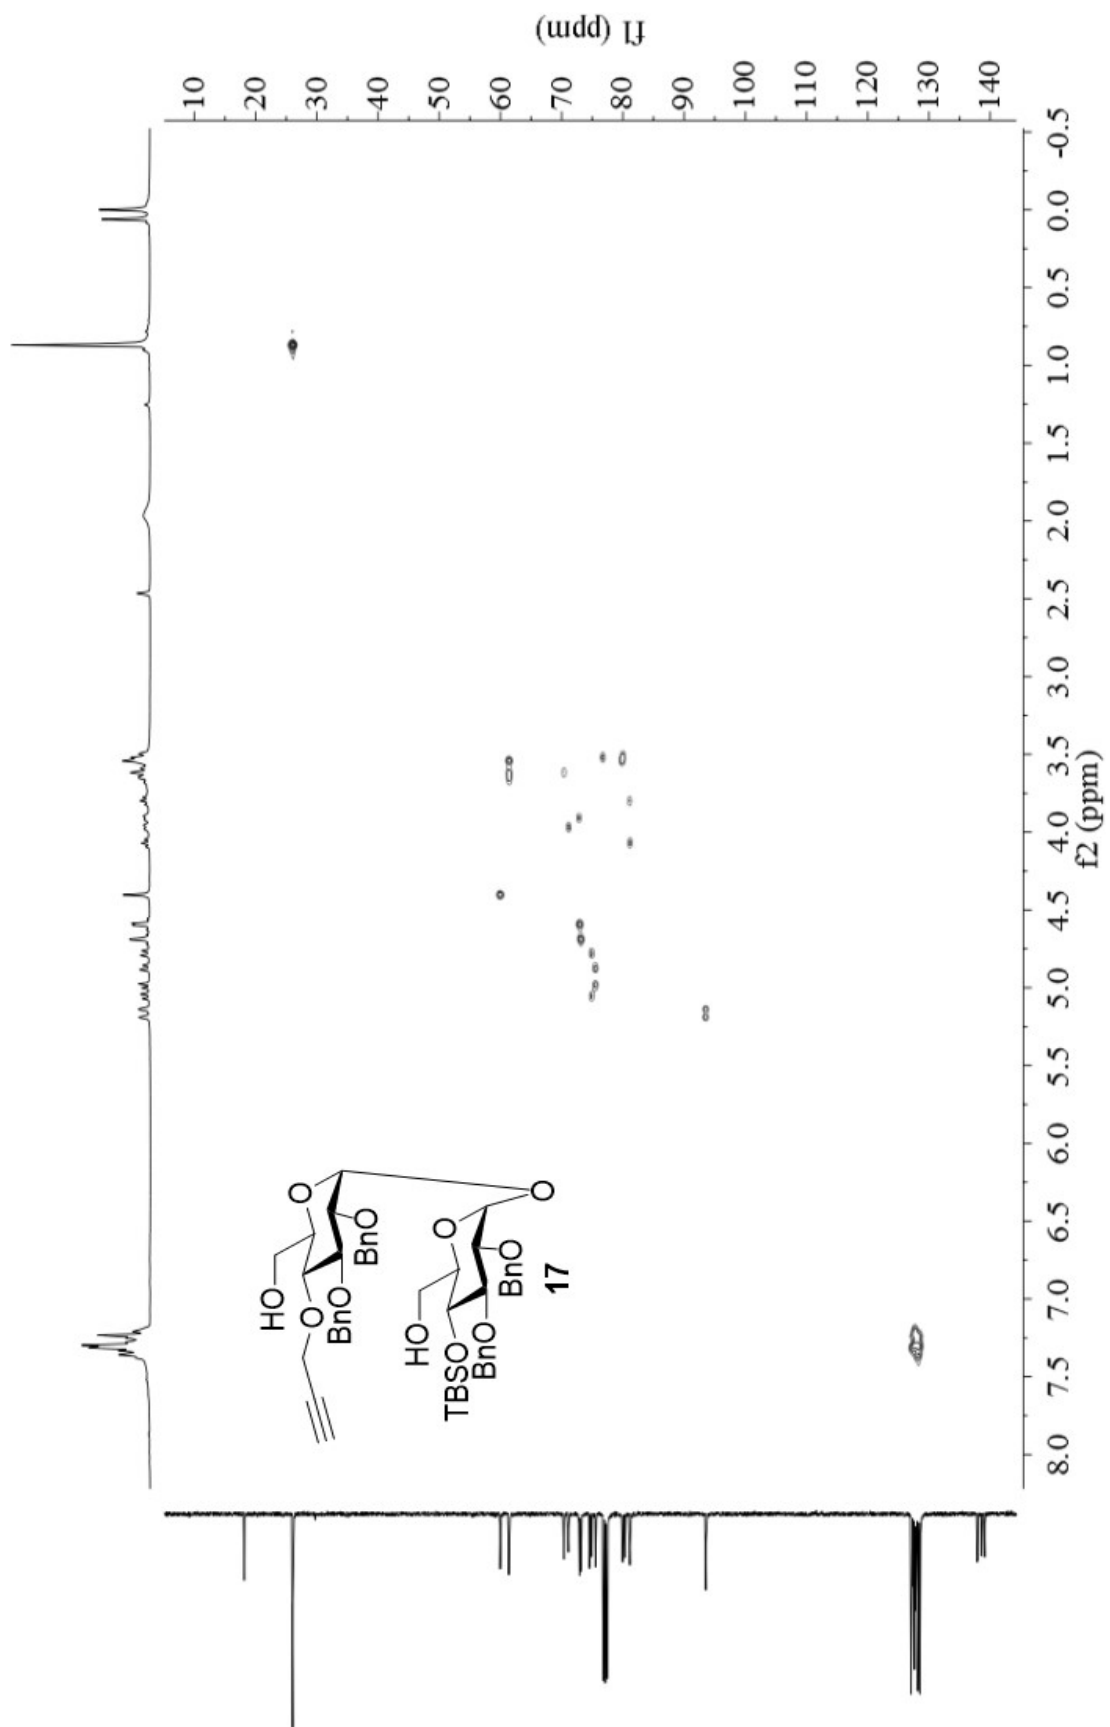

HSQC NMR Spectrum of compound **17** ( $\text{CDCl}_3$ , 400 MHz)



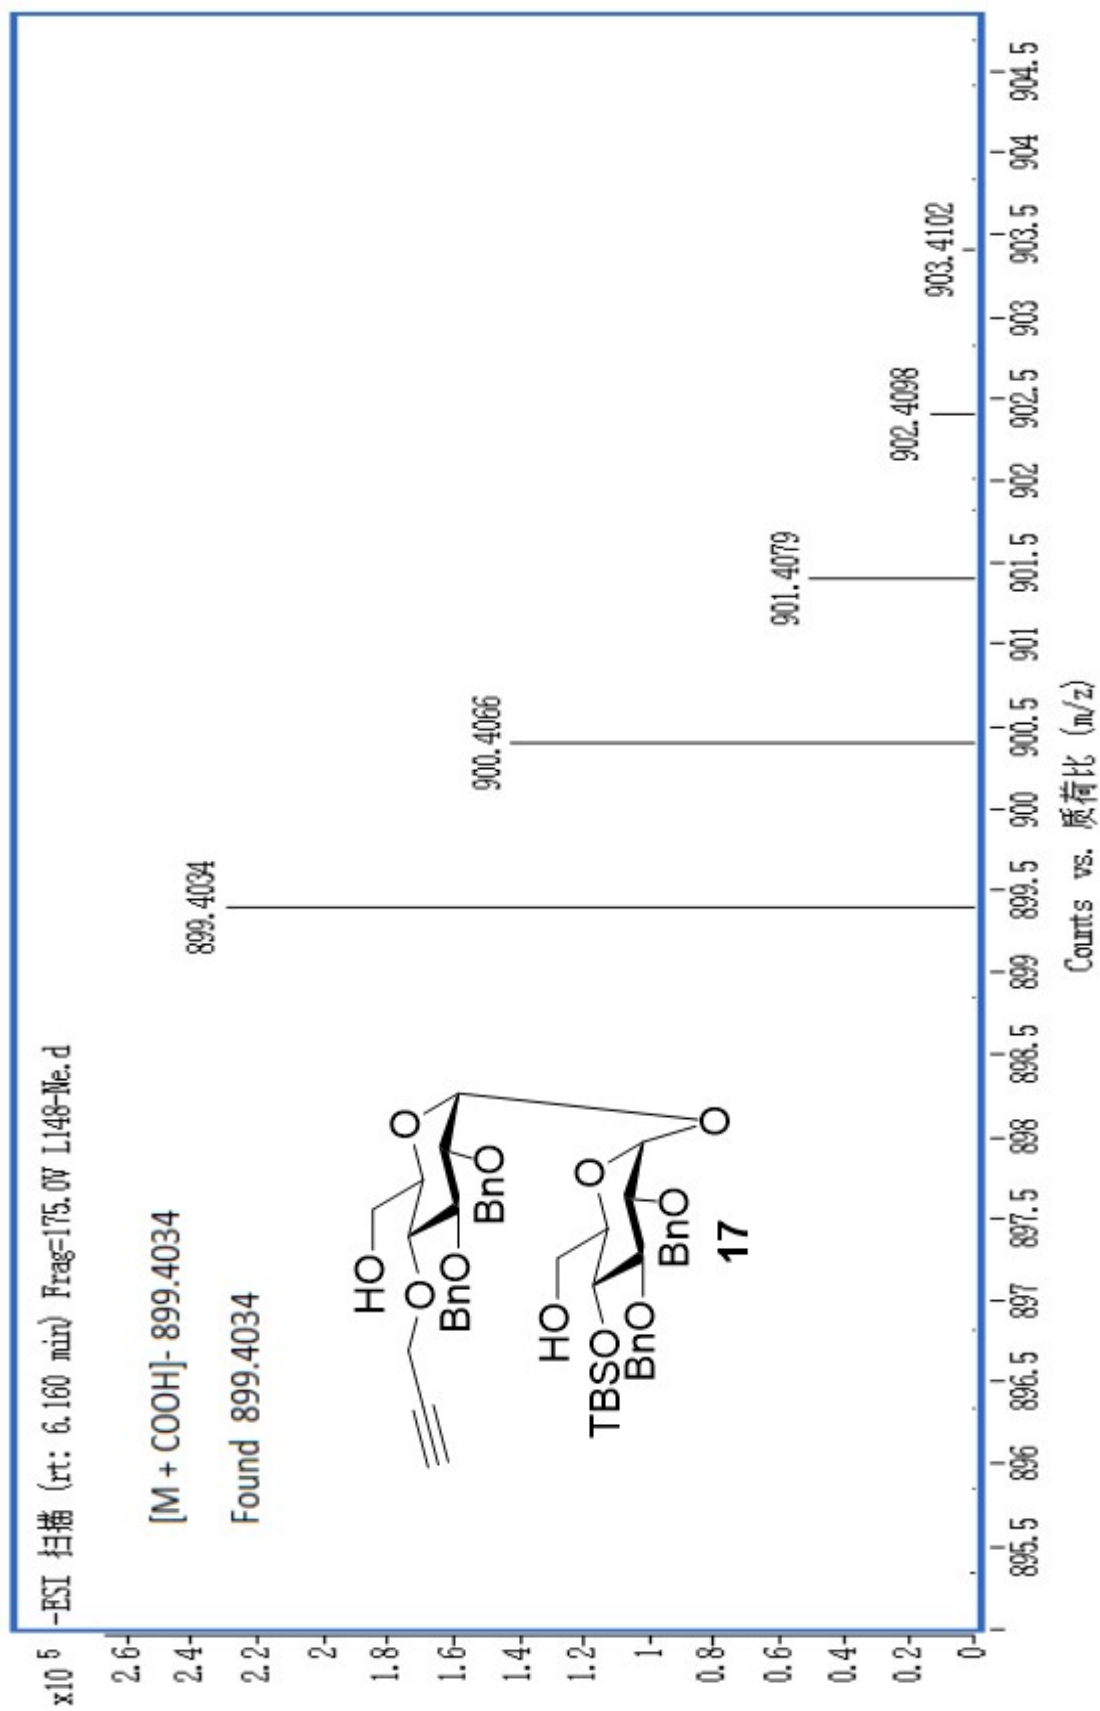

HR-ESI-MS spectrum of conjugate 17

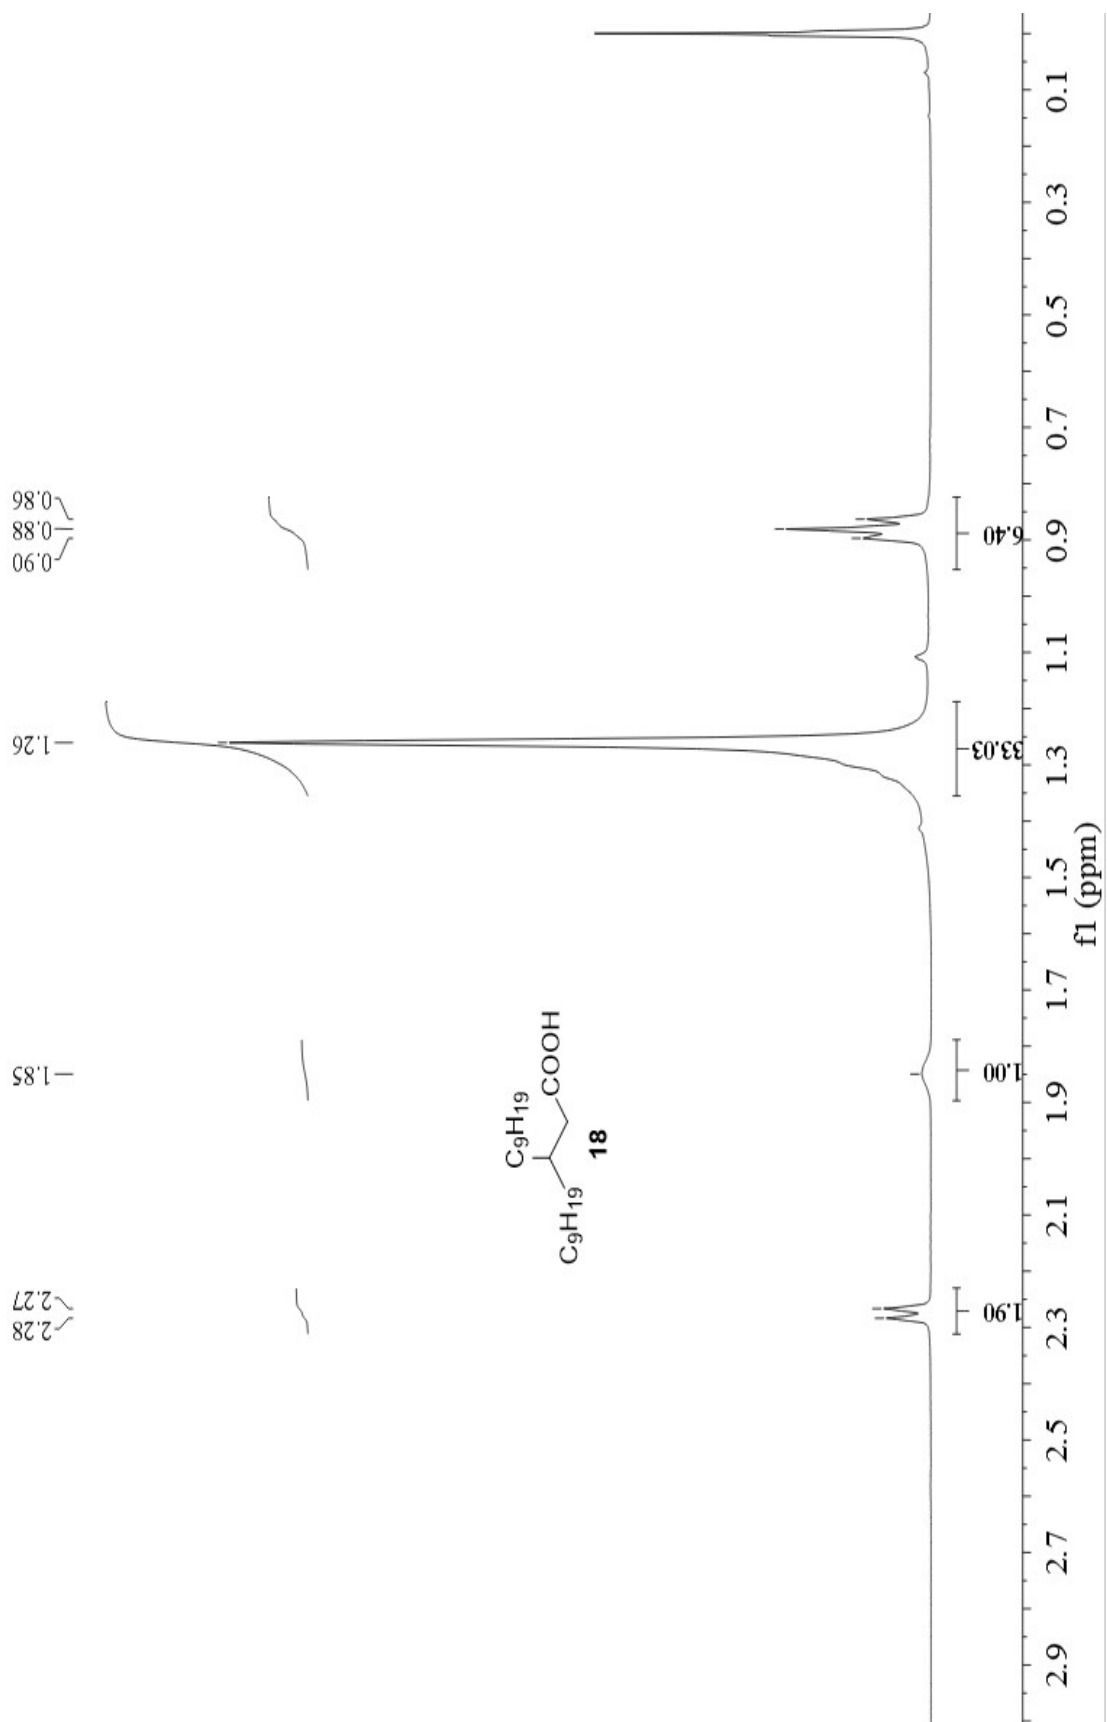

$^1\text{H}$  NMR Spectrum of compound **18** ( $\text{CDCl}_3$ , 400 MHz)

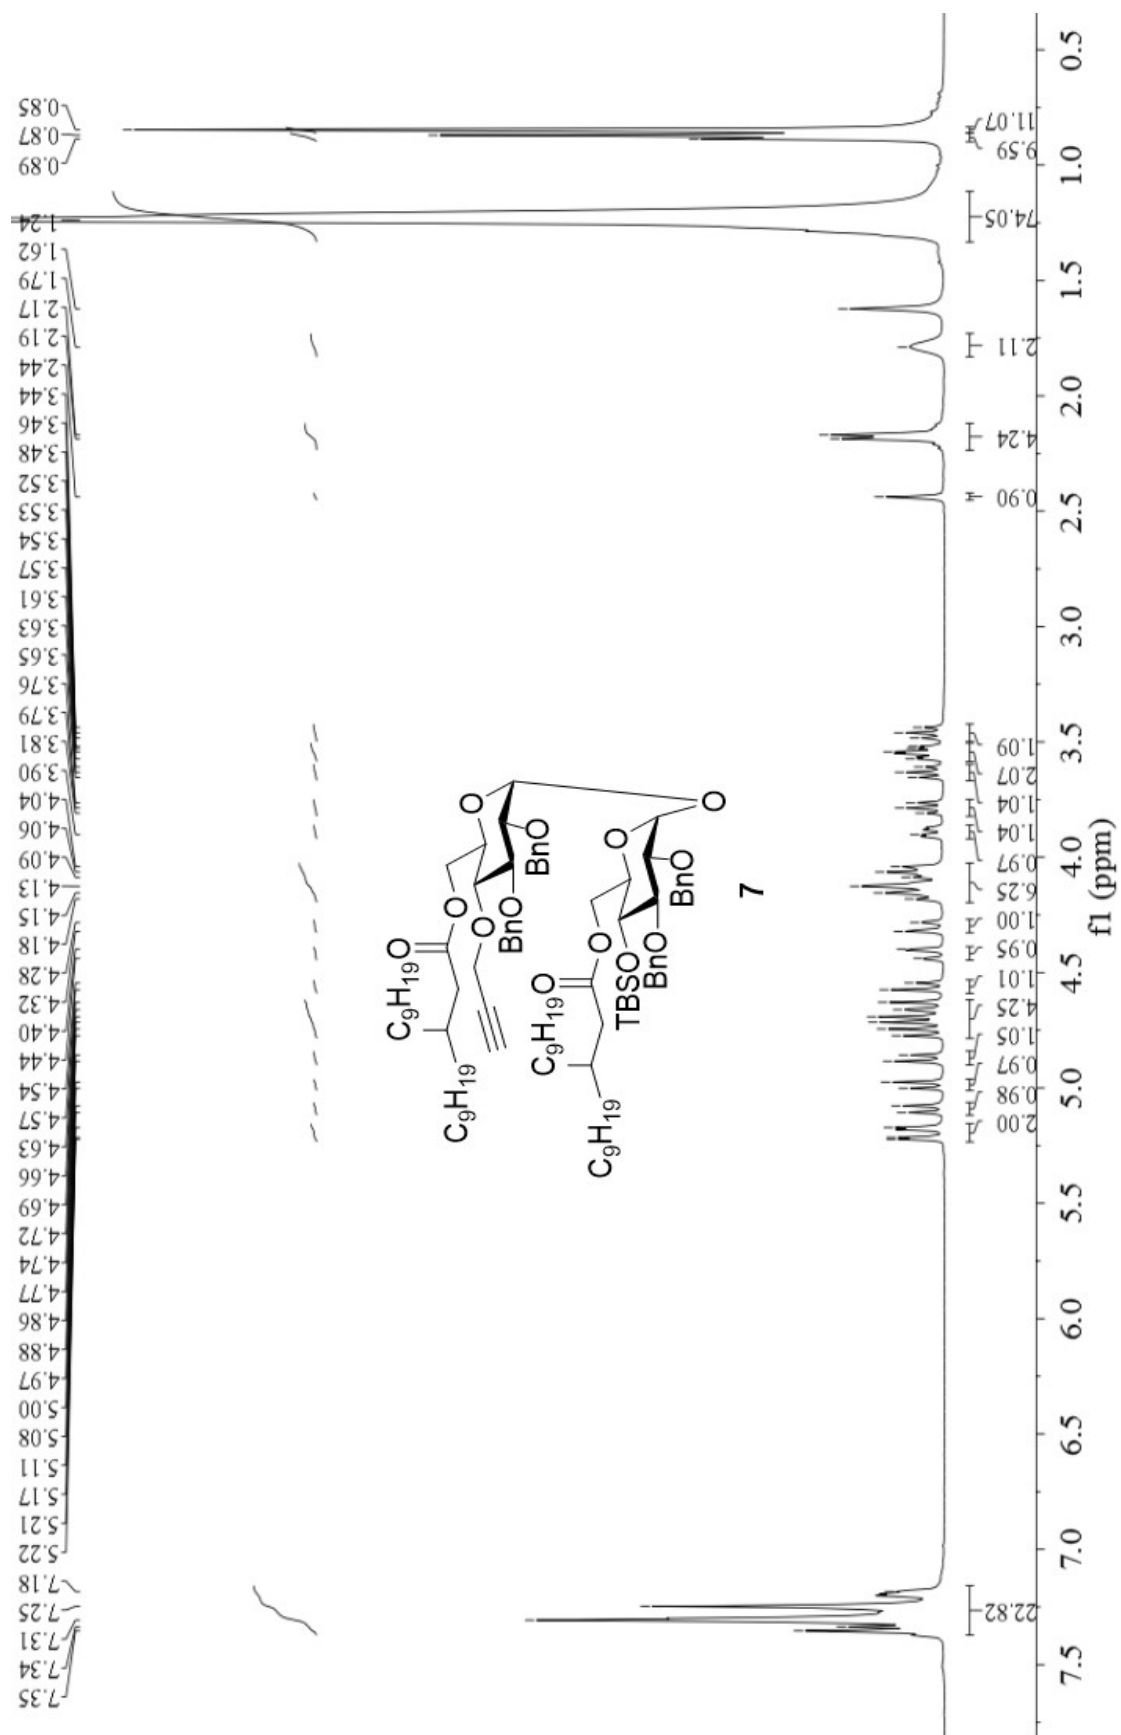

<sup>1</sup>H NMR Spectrum of compound 7 (CDCl<sub>3</sub>, 400 MHz)

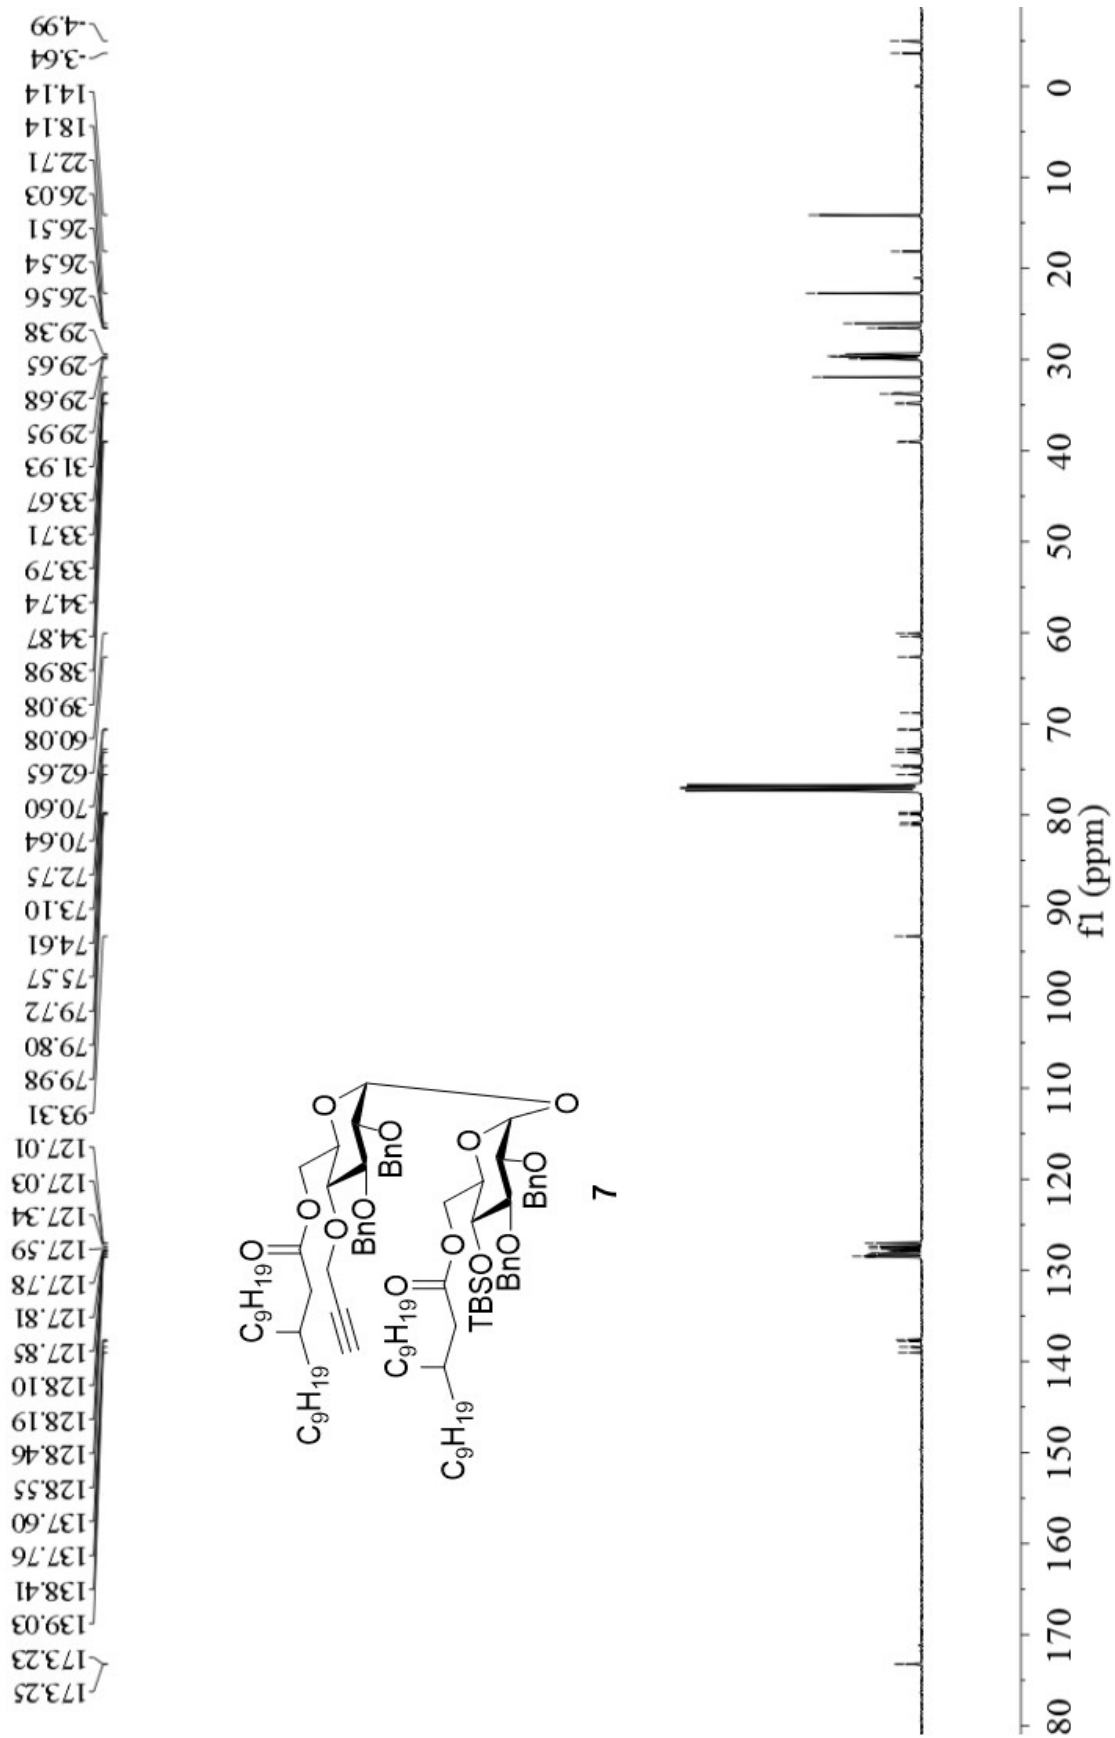

<sup>13</sup>C NMR Spectrum of compound 7 (CDCl<sub>3</sub>, 400 MHz)

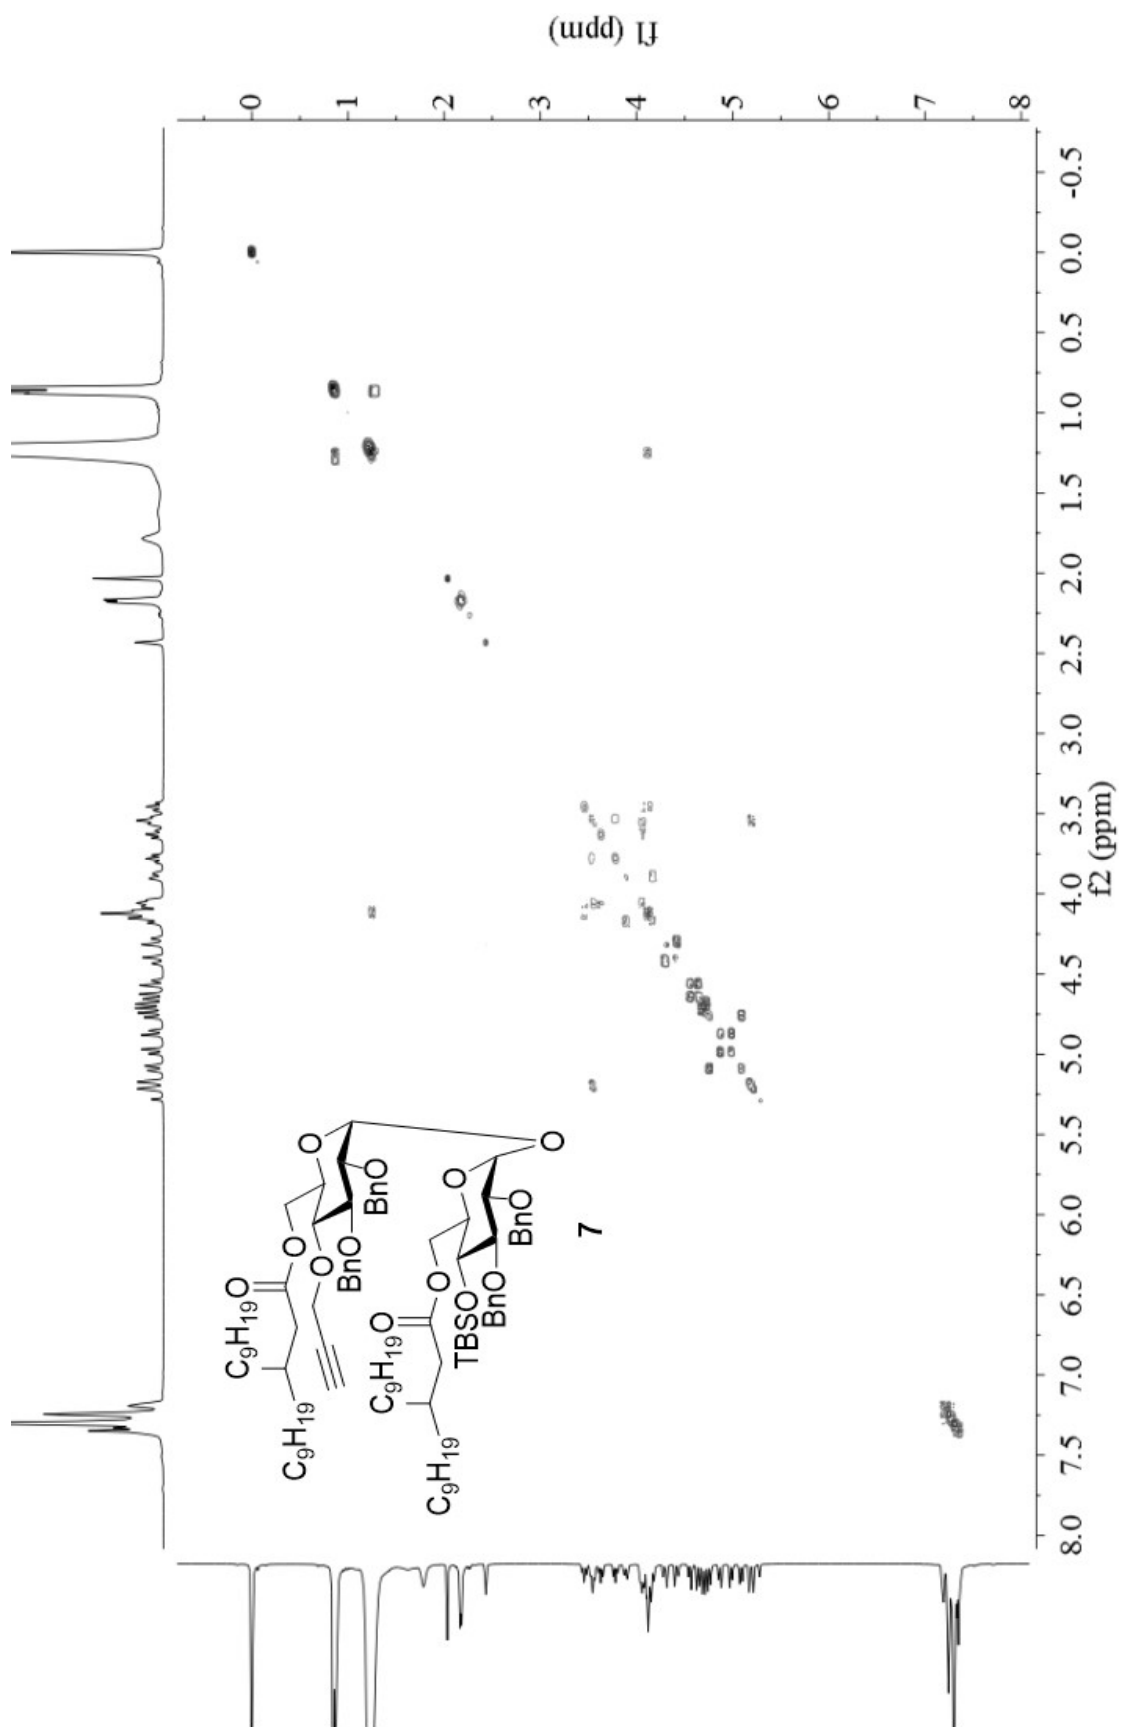

$^1\text{H}$ -  $^1\text{H}$  COSY Spectrum of compound **7** ( $\text{CDCl}_3$ , 400 MHz)

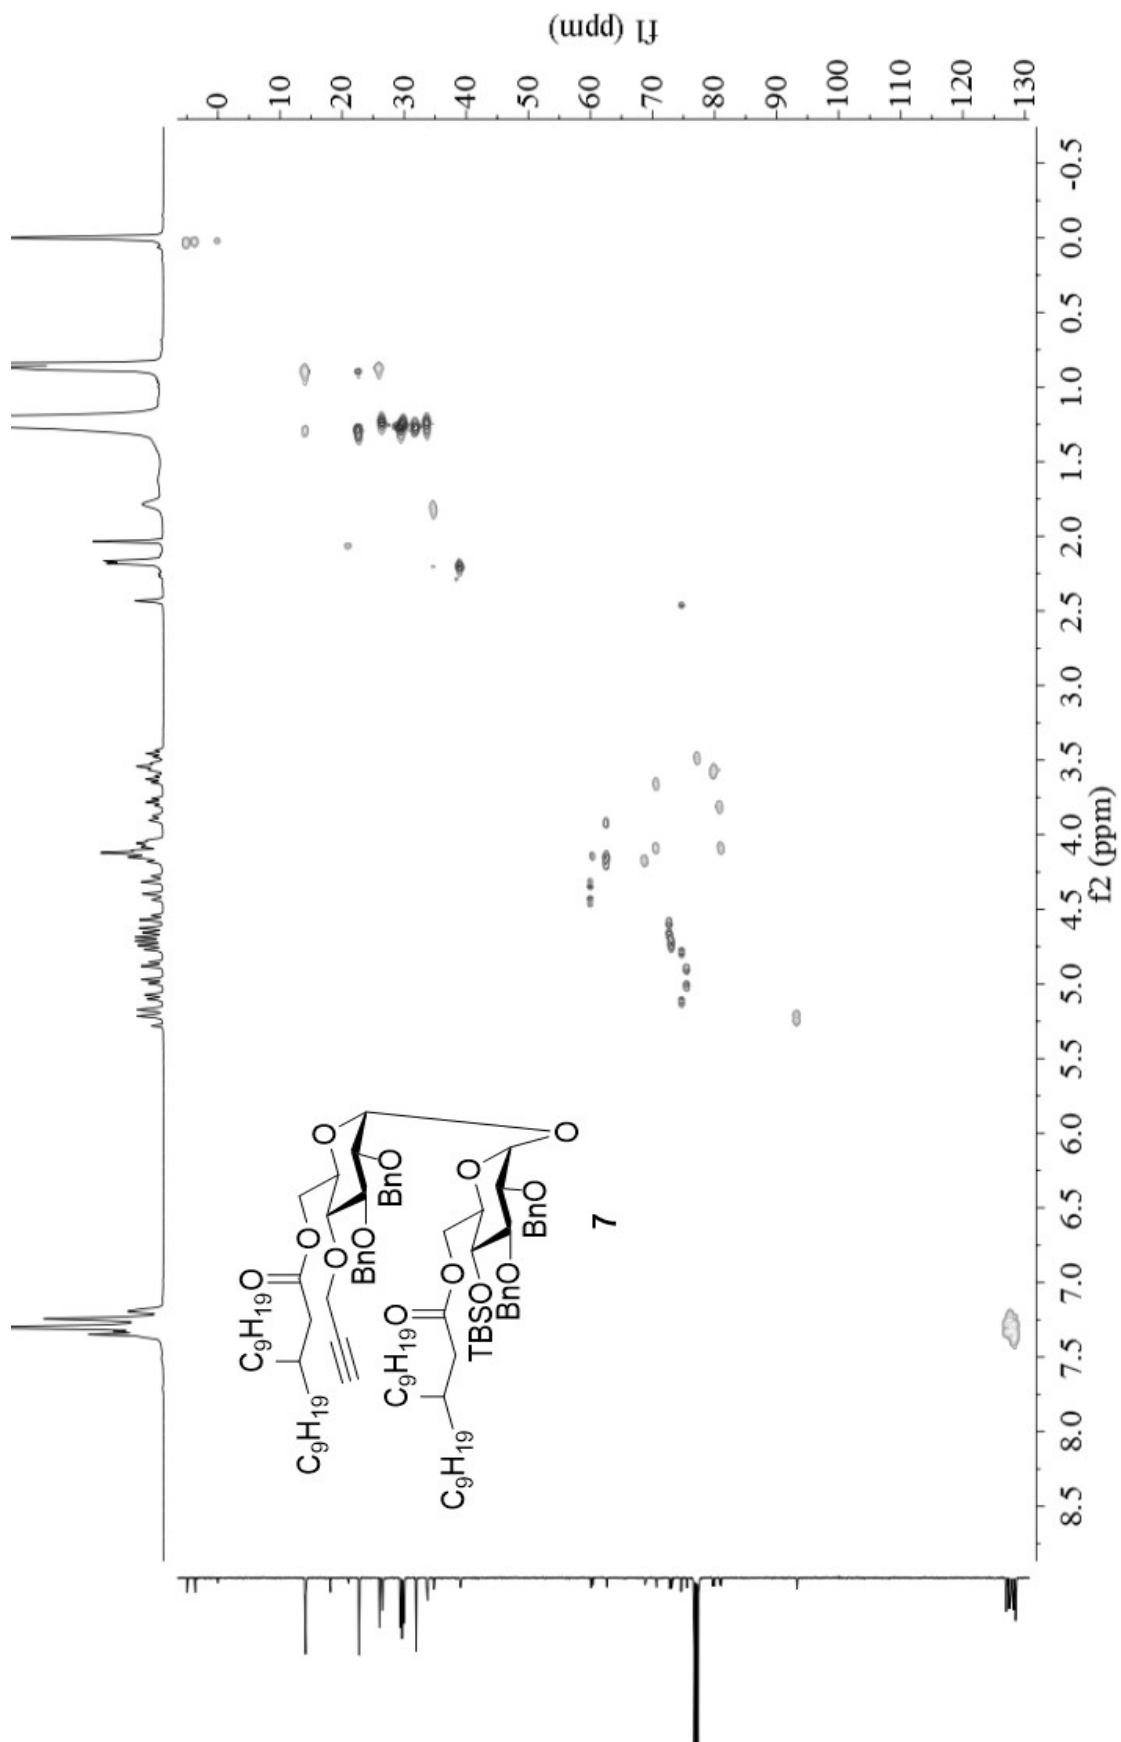

HSQC Spectrum of compound 7 (CDCl<sub>3</sub>, 400 MHz)

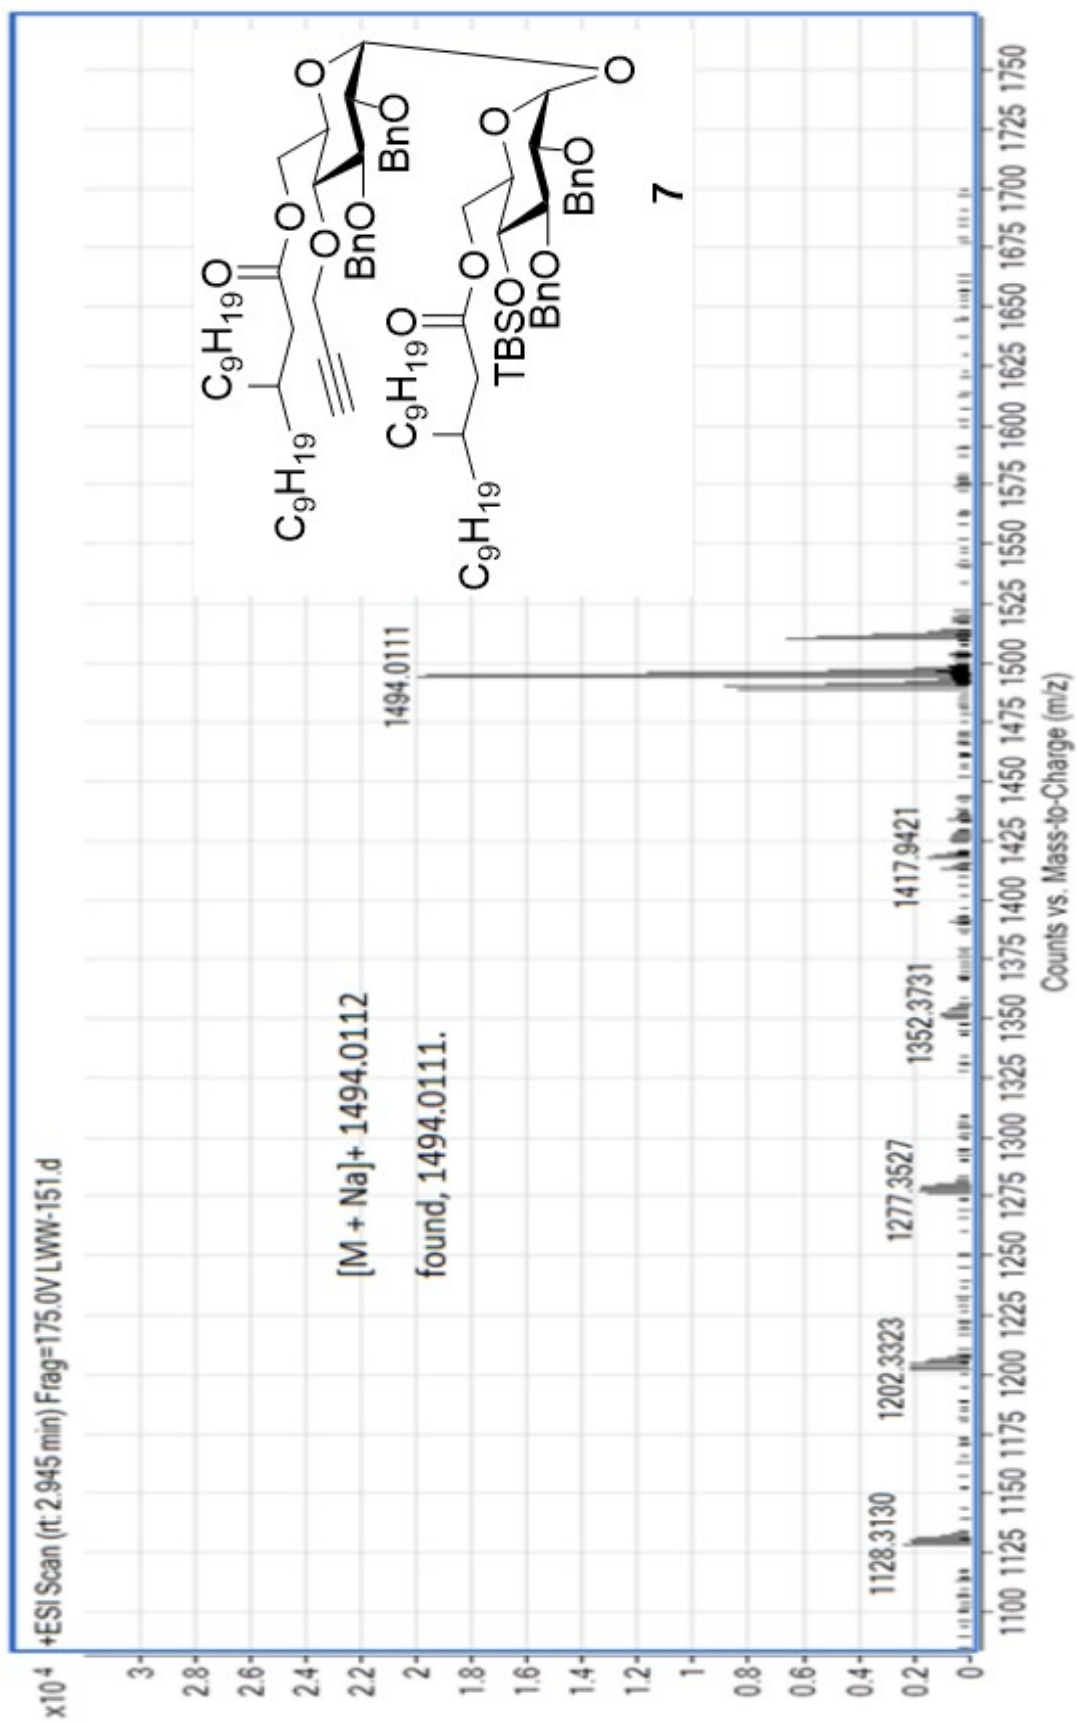

HR-ESI-MS spectrum of conjugate 7





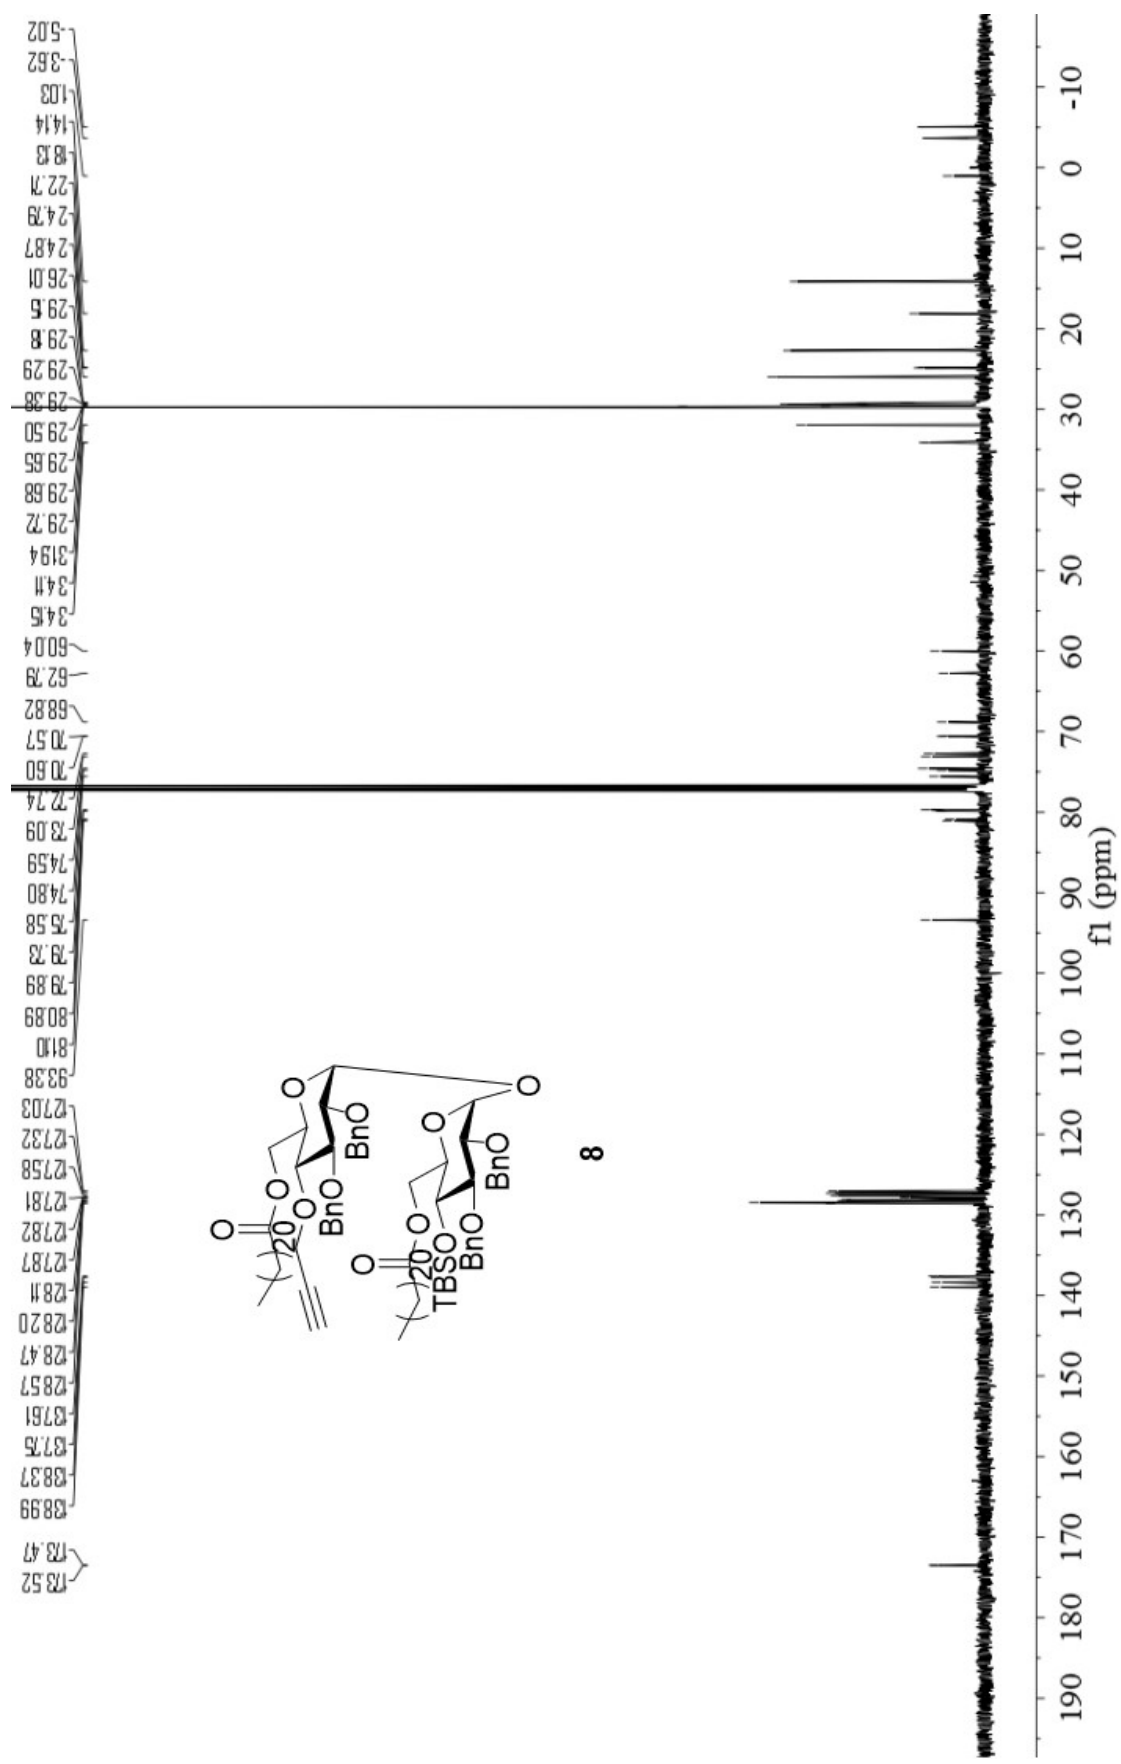

<sup>13</sup>C NMR Spectrum of compound **8** (CDCl<sub>3</sub>, 400 MHz)

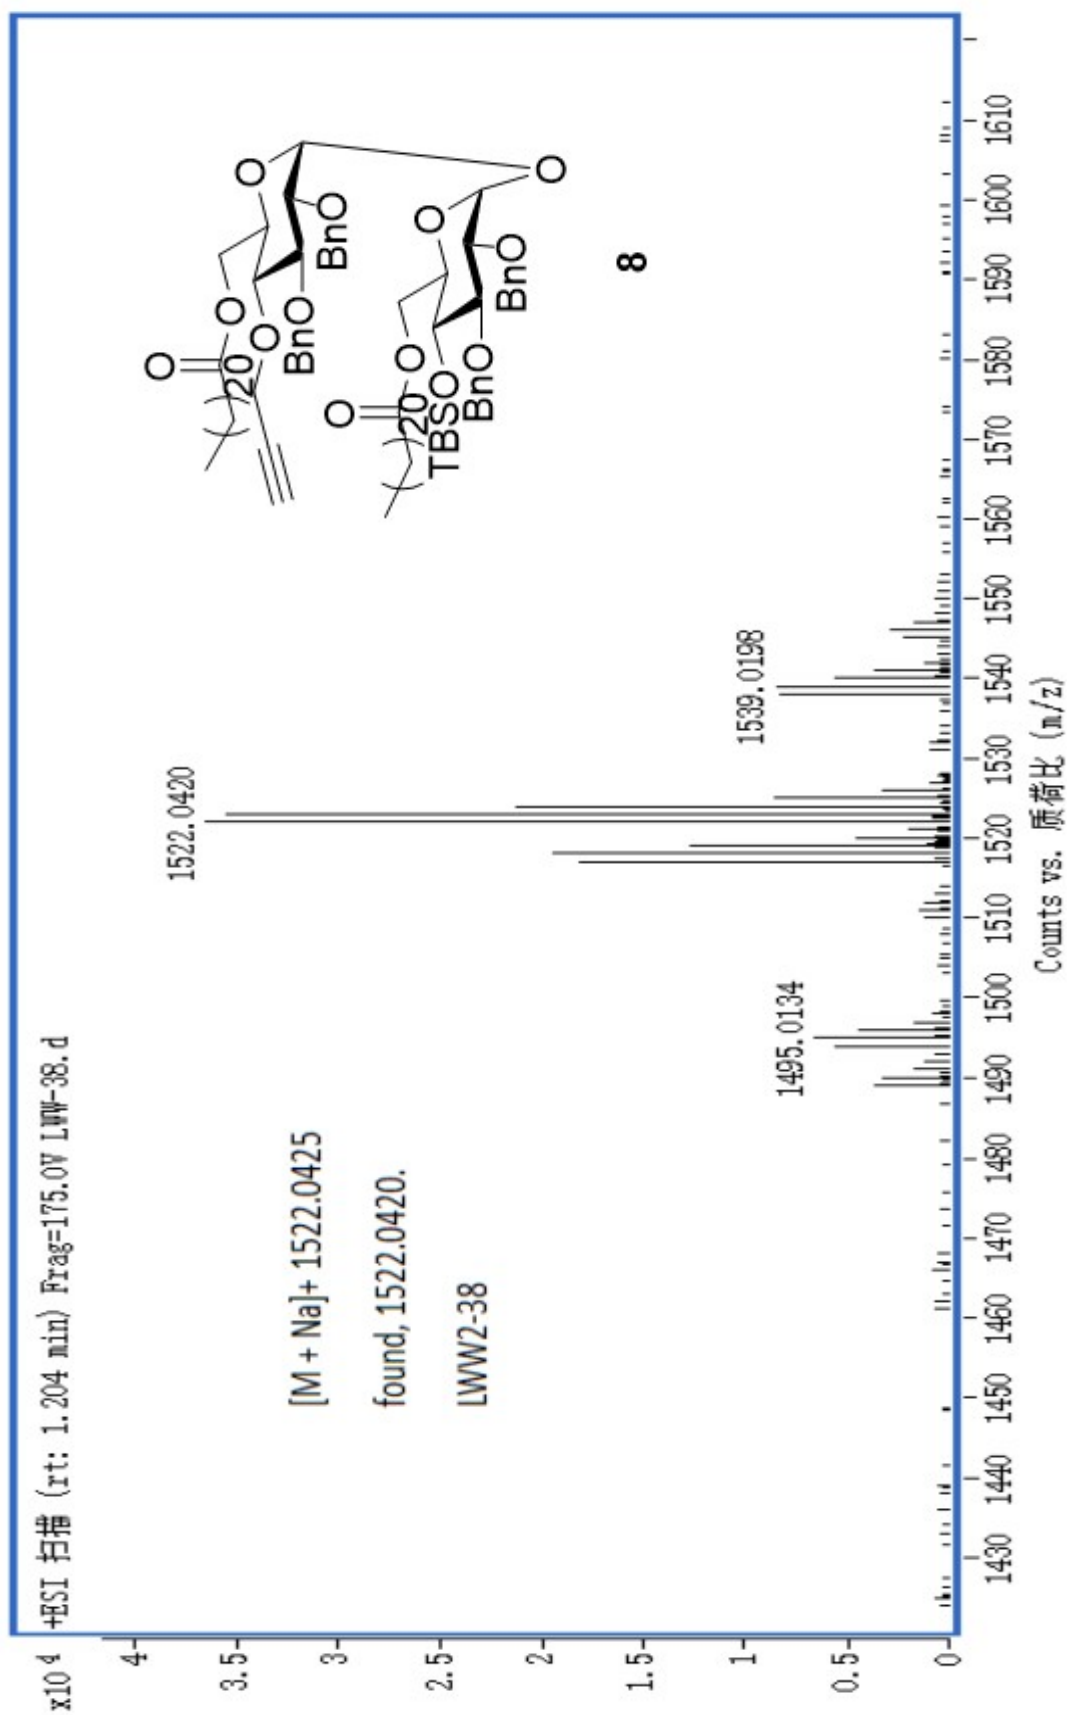

HR-ESI-MS spectrum of conjugate **8**

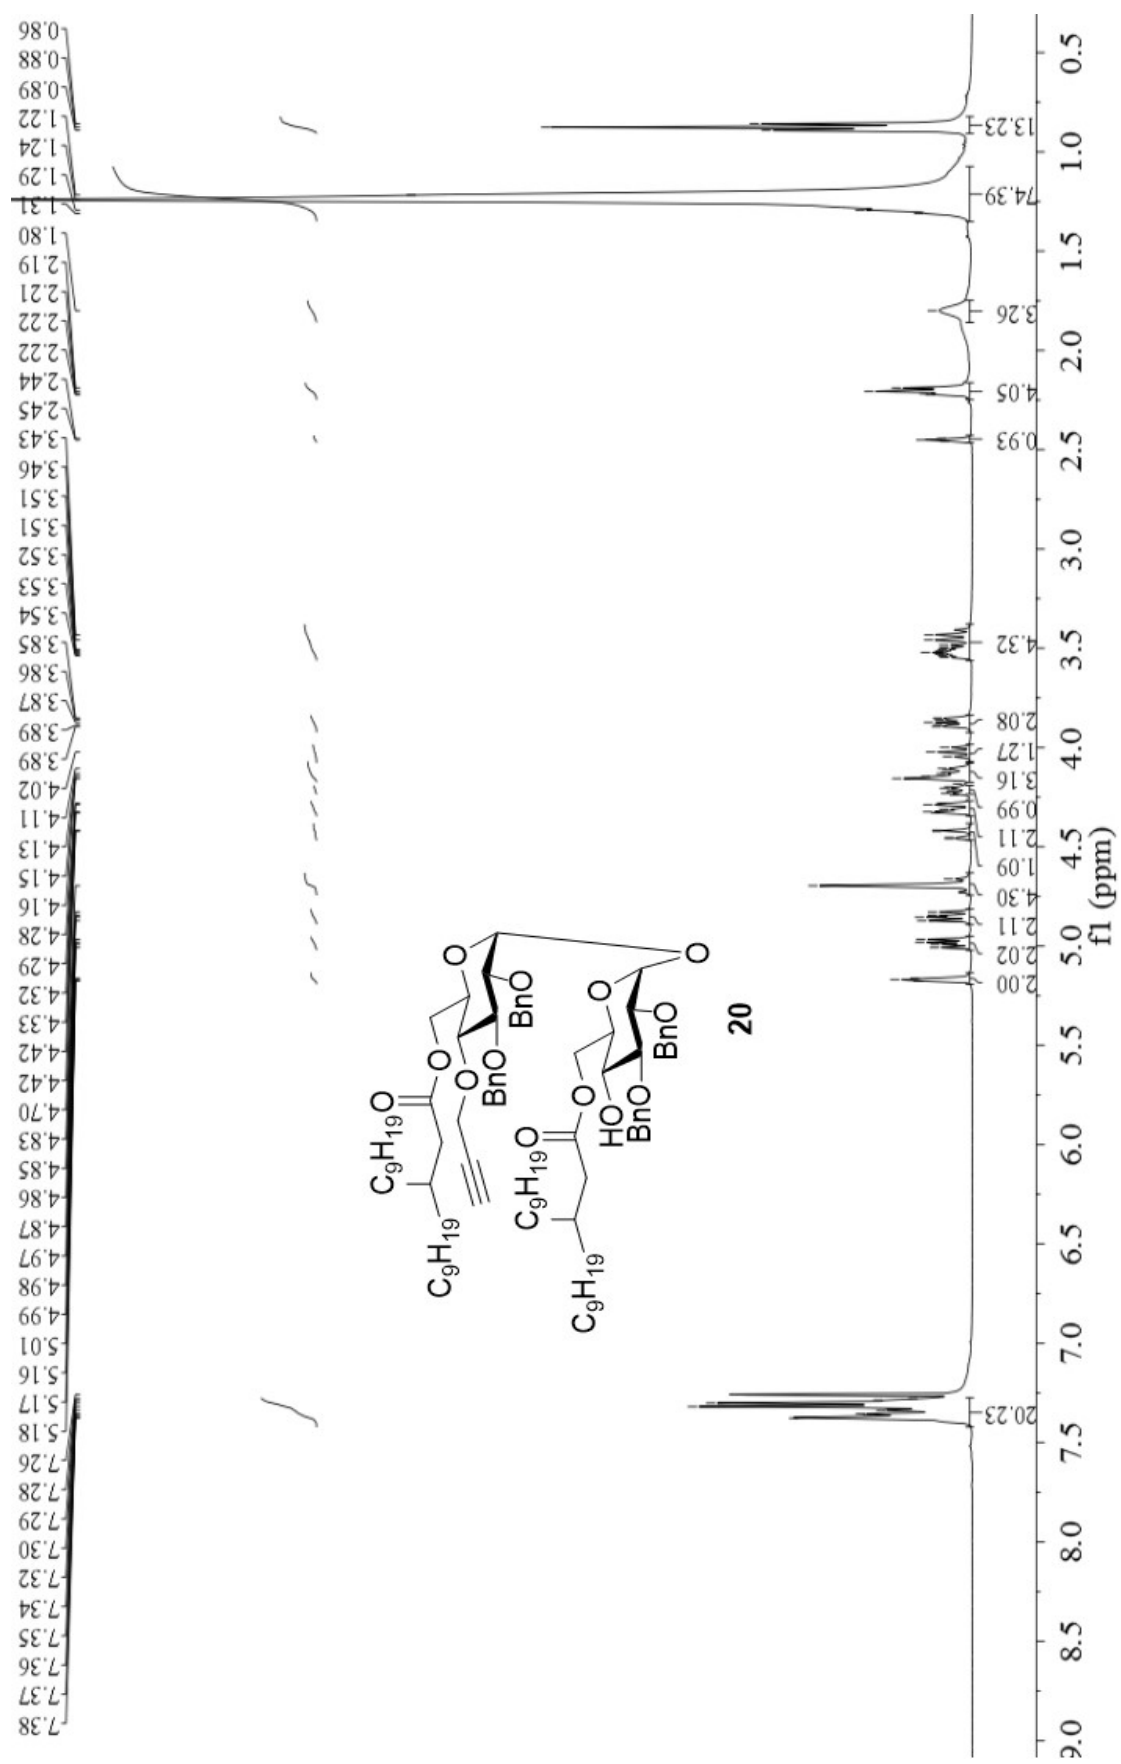

$^1\text{H}$  NMR Spectrum of compound **20** ( $\text{CDCl}_3$ , 400 MHz)

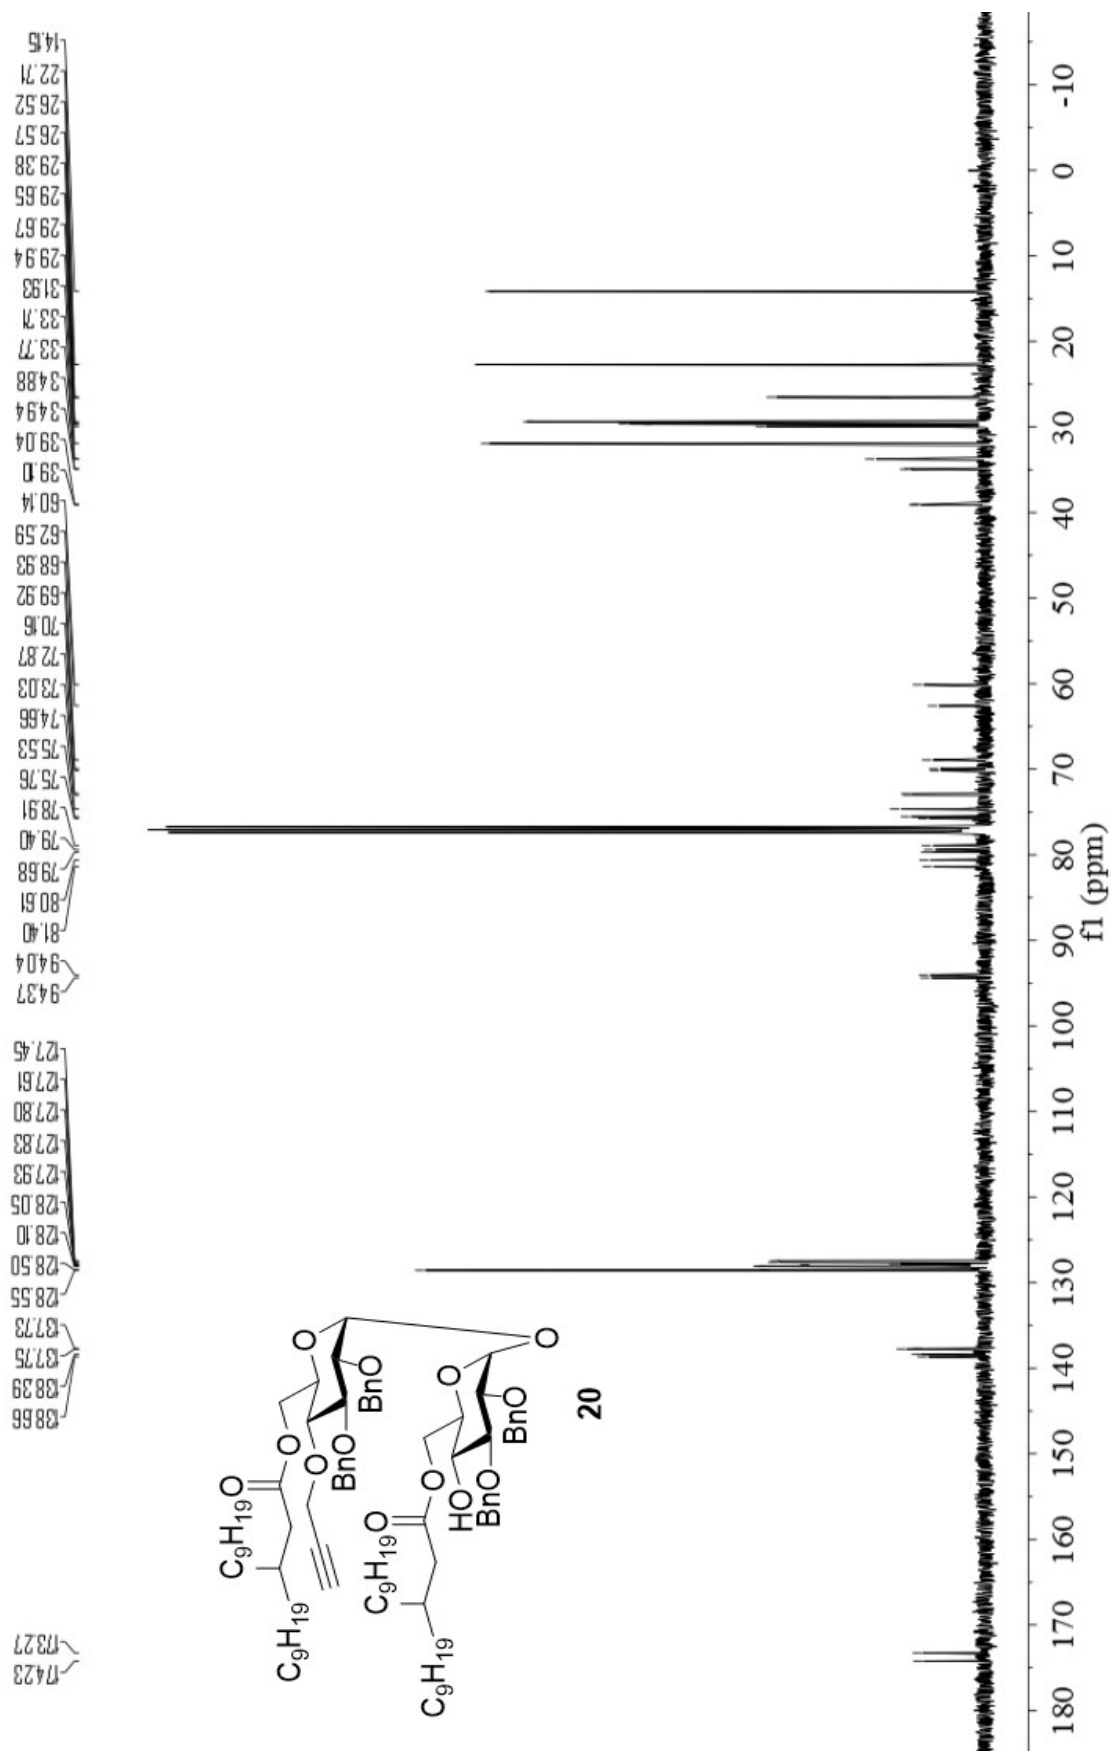

$^{13}C$  NMR Spectrum of compound **20** ( $CDCl_3$ , 400 MHz)

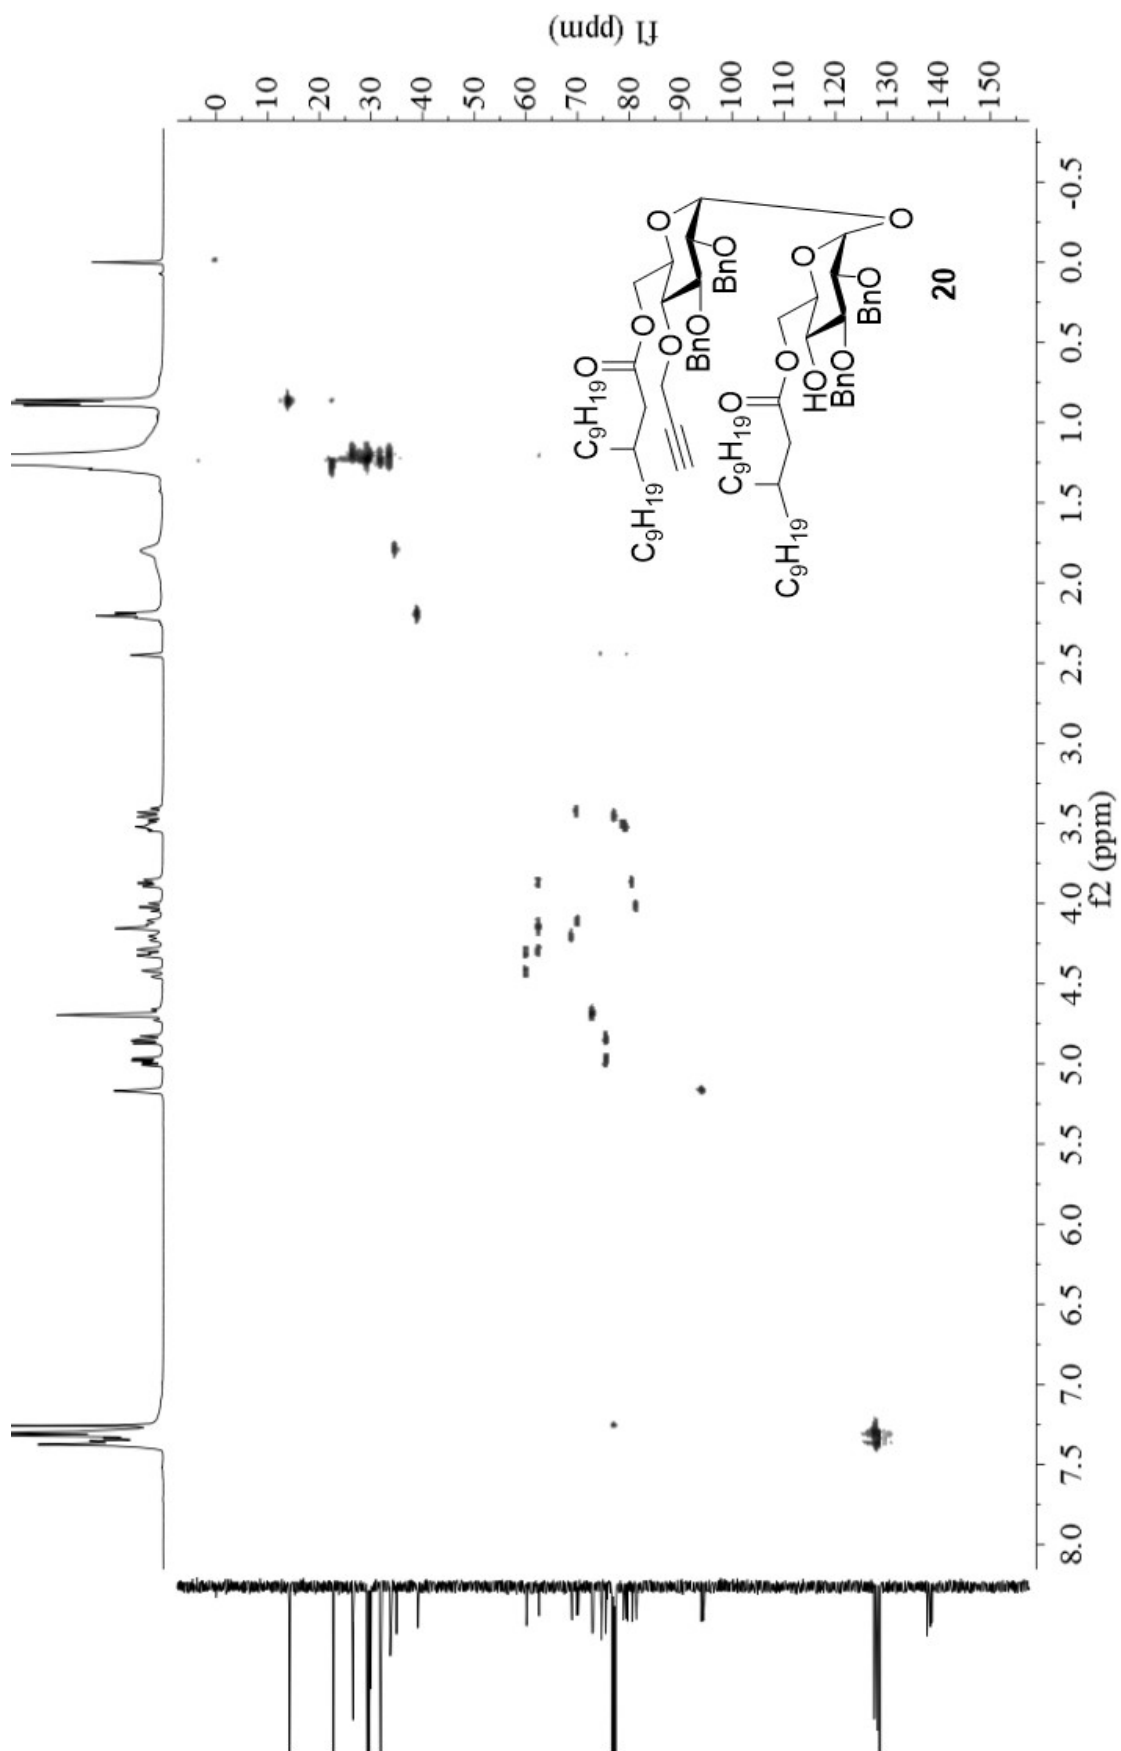

HSQC NMR Spectrum of compound **20** ( $\text{CDCl}_3$ , 400 MHz)

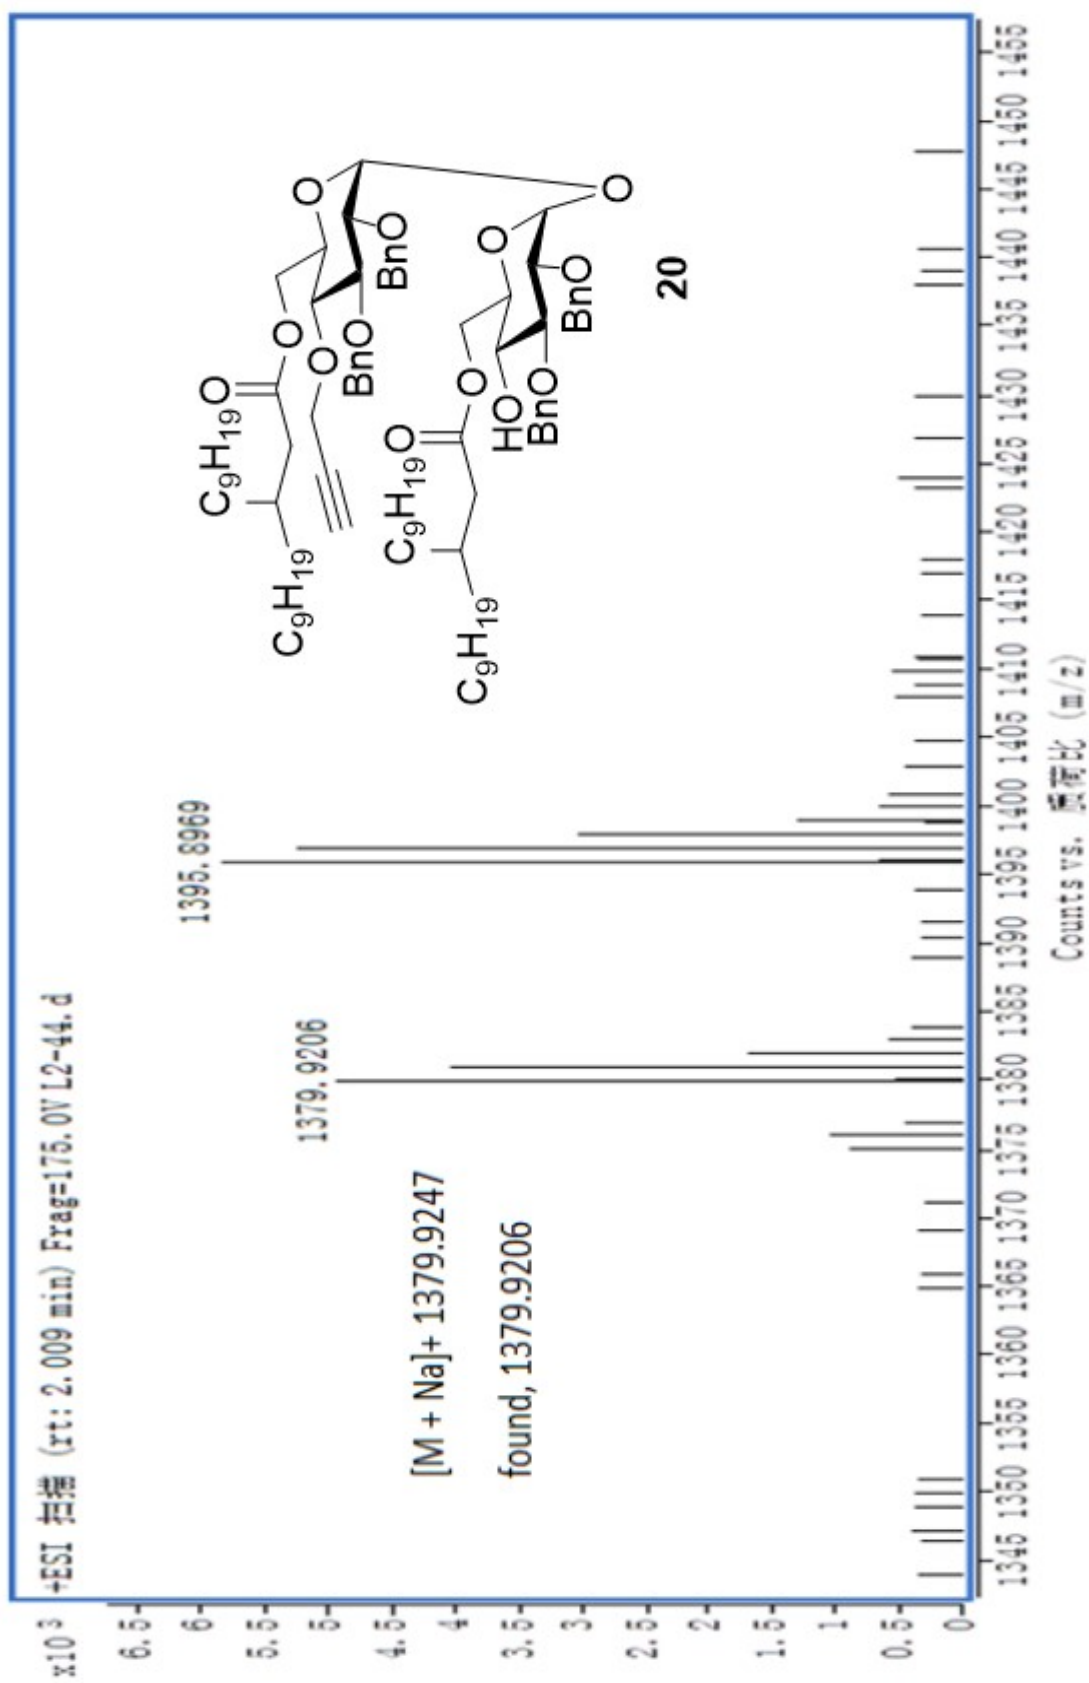

HR-ESI-MS spectrum of conjugate **20**

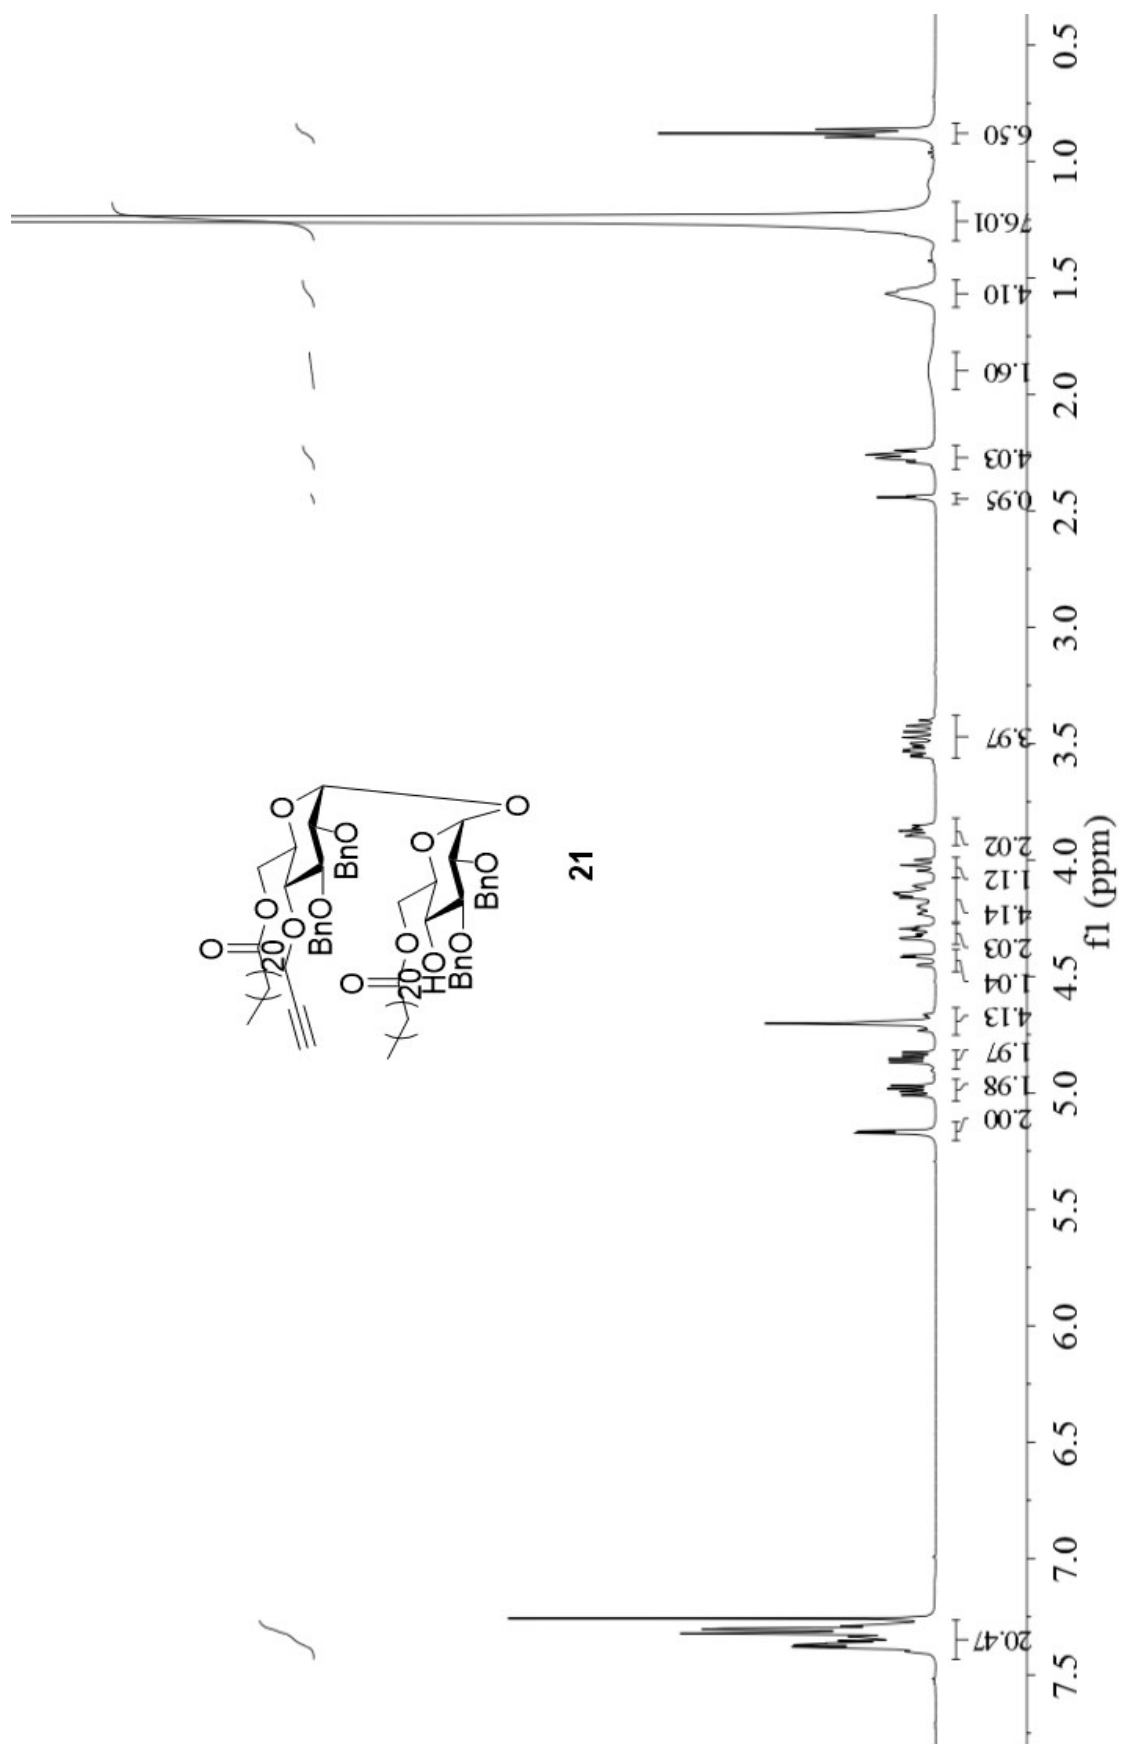

$^1\text{H}$  NMR Spectrum of compound **21** (CDCl<sub>3</sub>, 400 MHz)

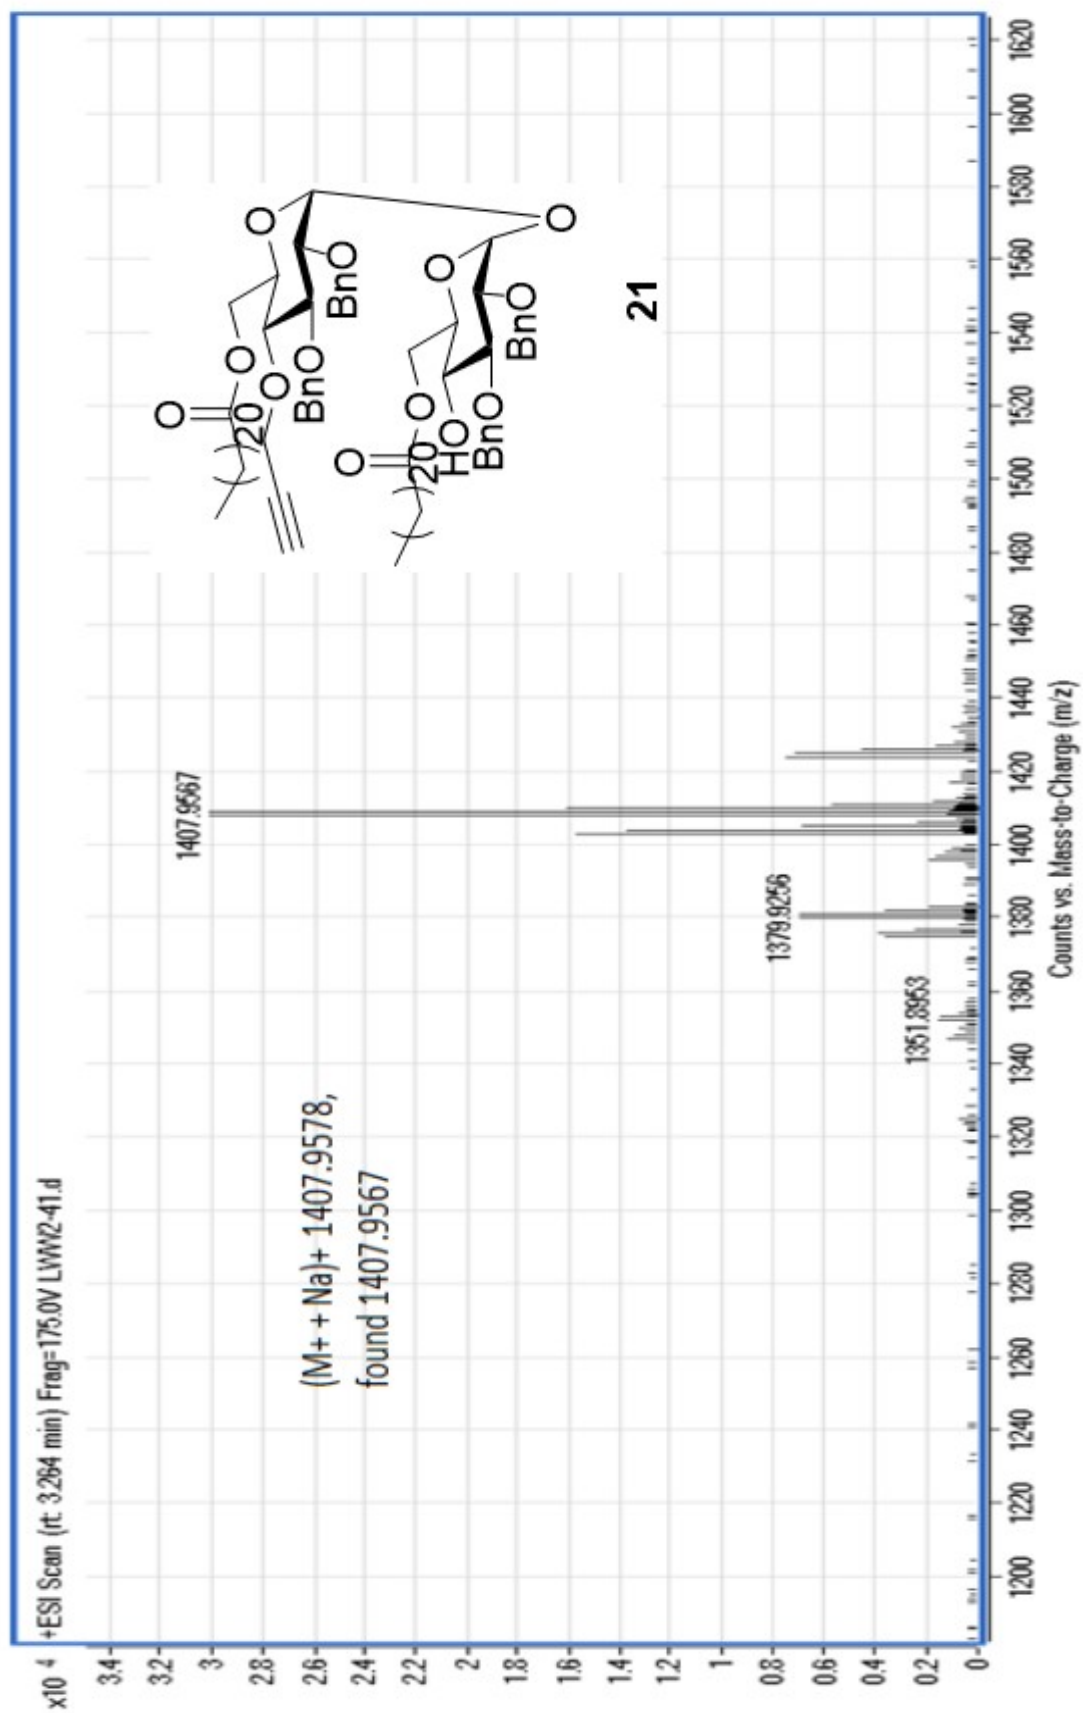

HR-ESI-MS spectrum of conjugate 21



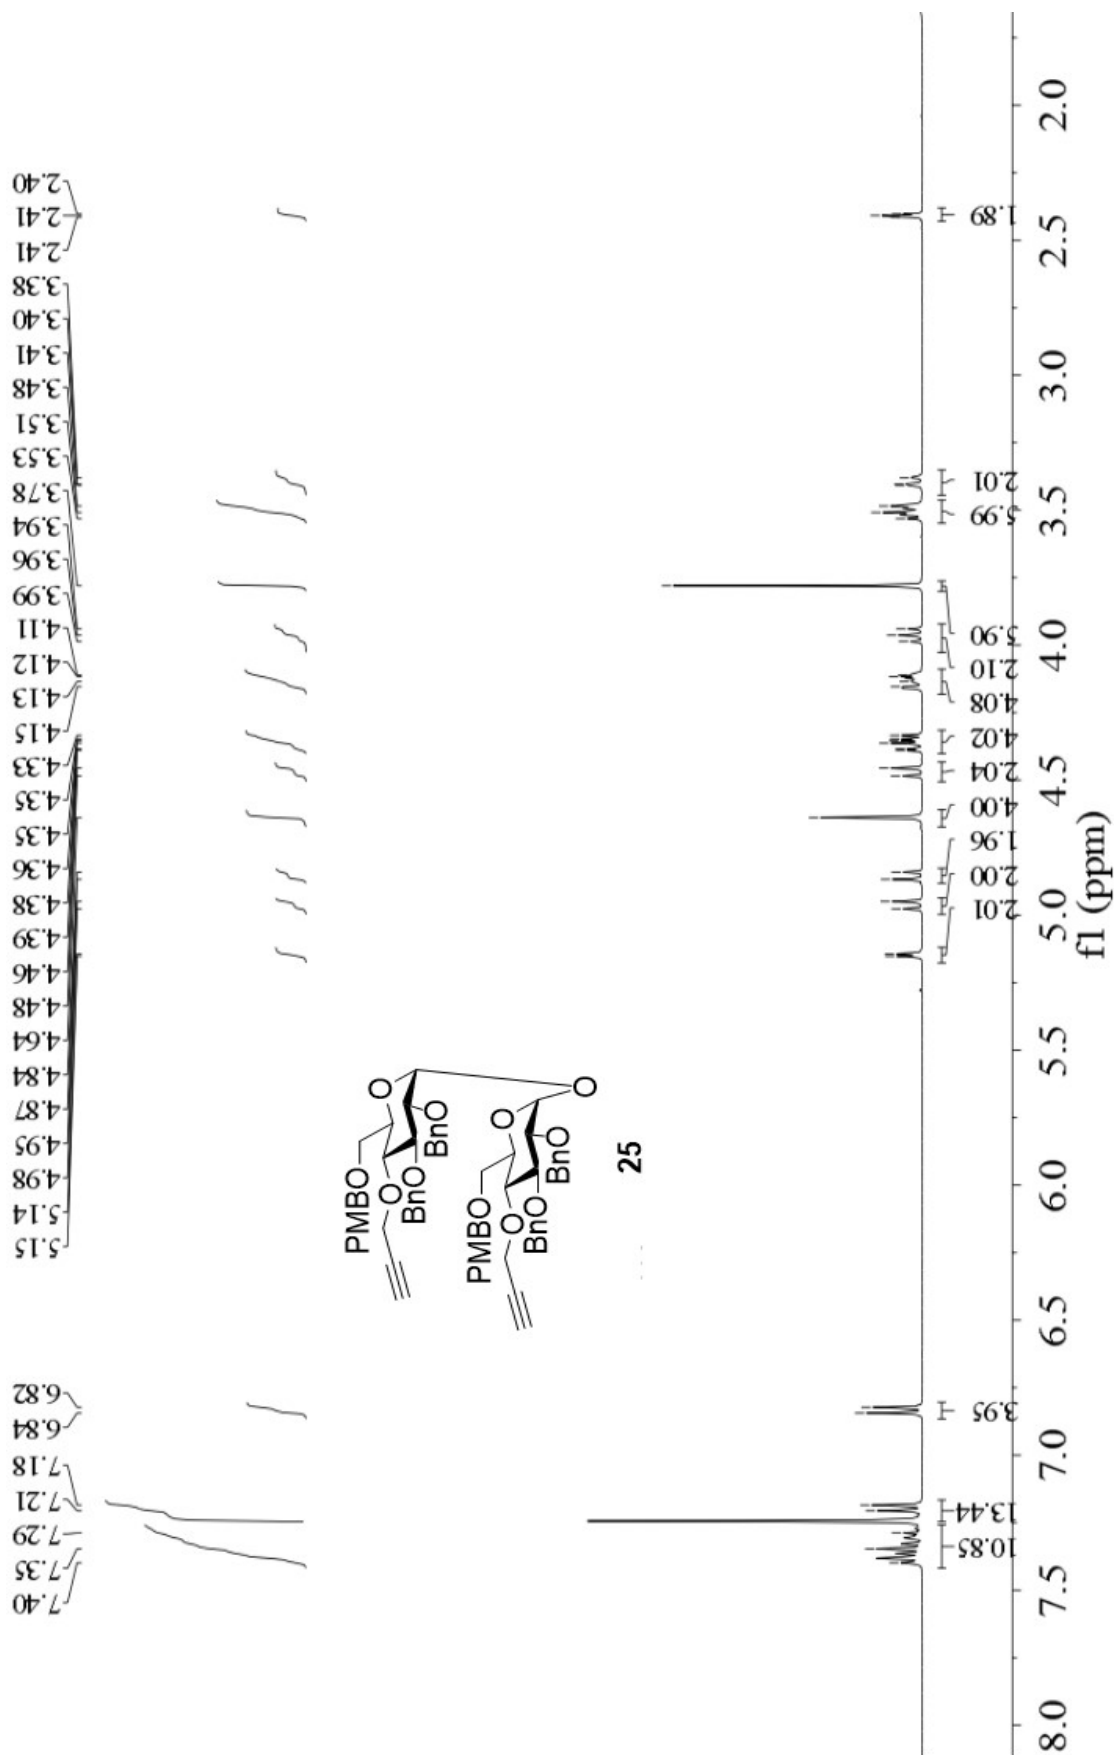

<sup>1</sup>H NMR Spectrum of compound **25** (CDCl<sub>3</sub>, 400 MHz)

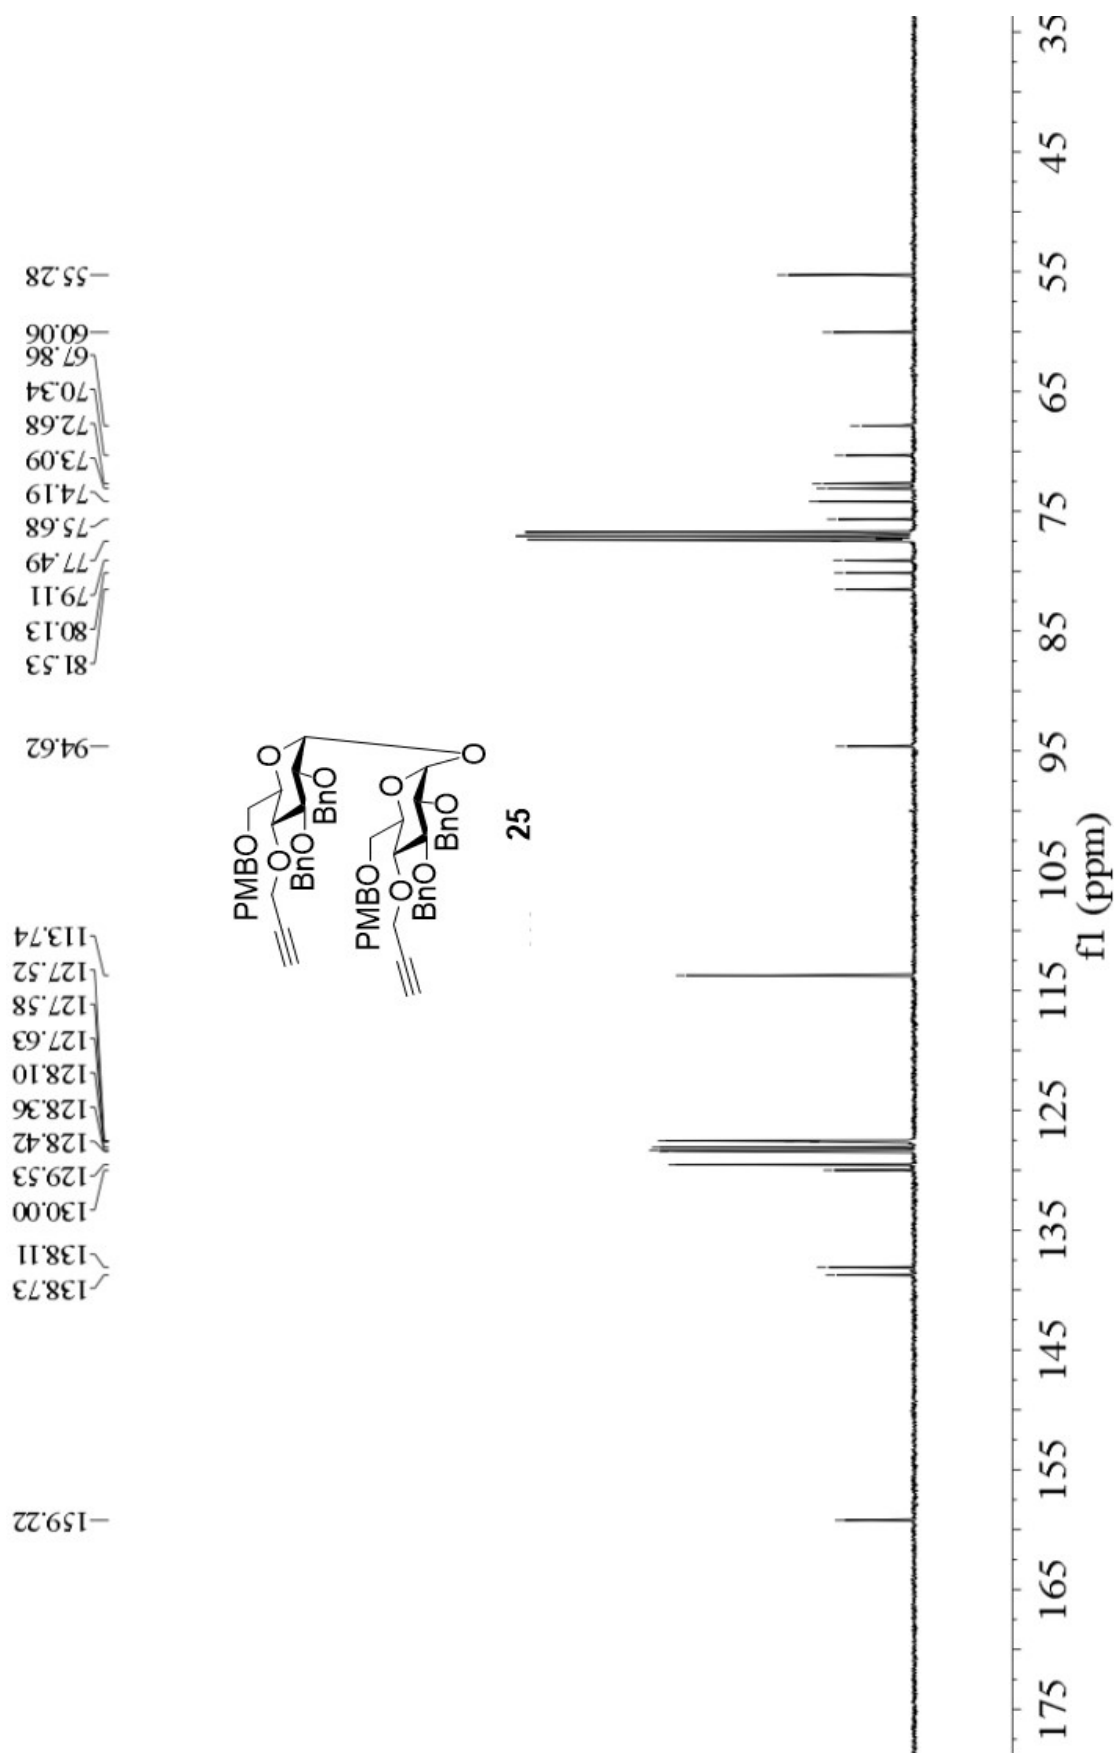

<sup>13</sup>C NMR Spectrum of compound **25** (CDCl<sub>3</sub>, 400 MHz)

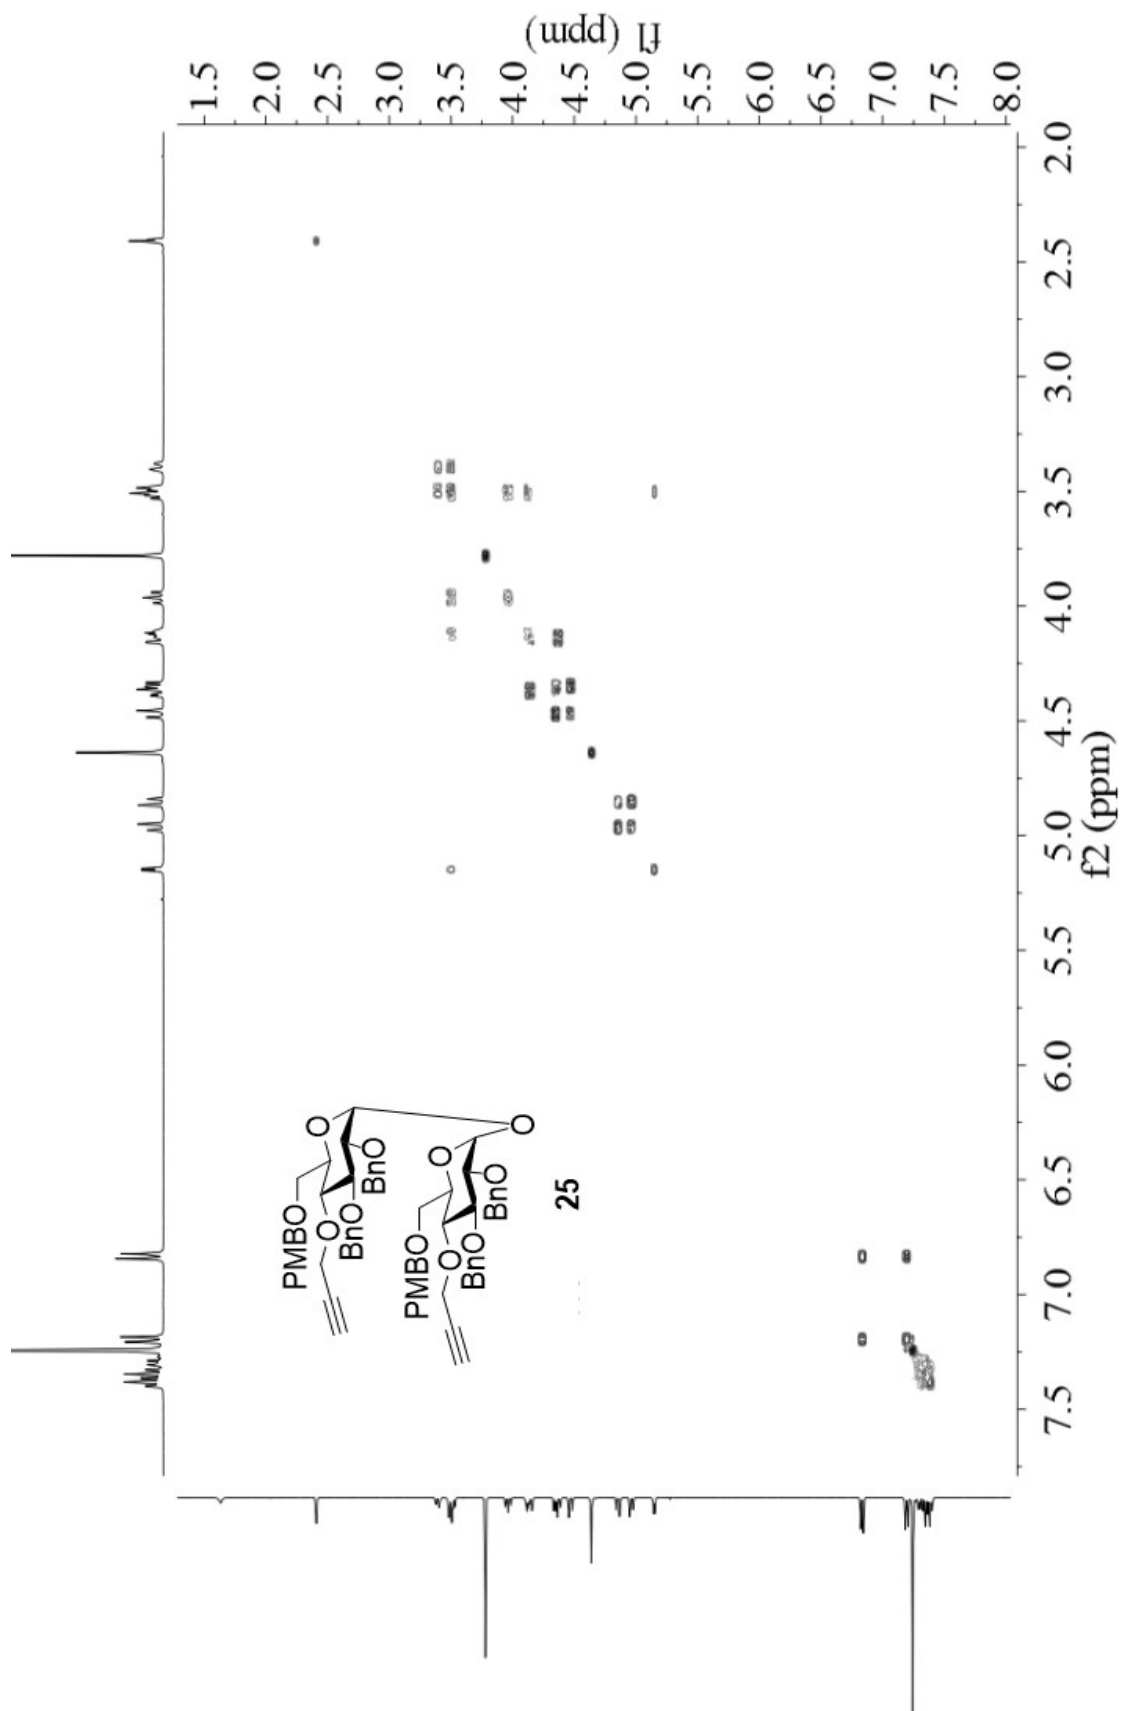

$^1\text{H}$ - $^1\text{H}$  COSY NMR Spectrum of compound **25** ( $\text{CDCl}_3$ , 400 MHz)

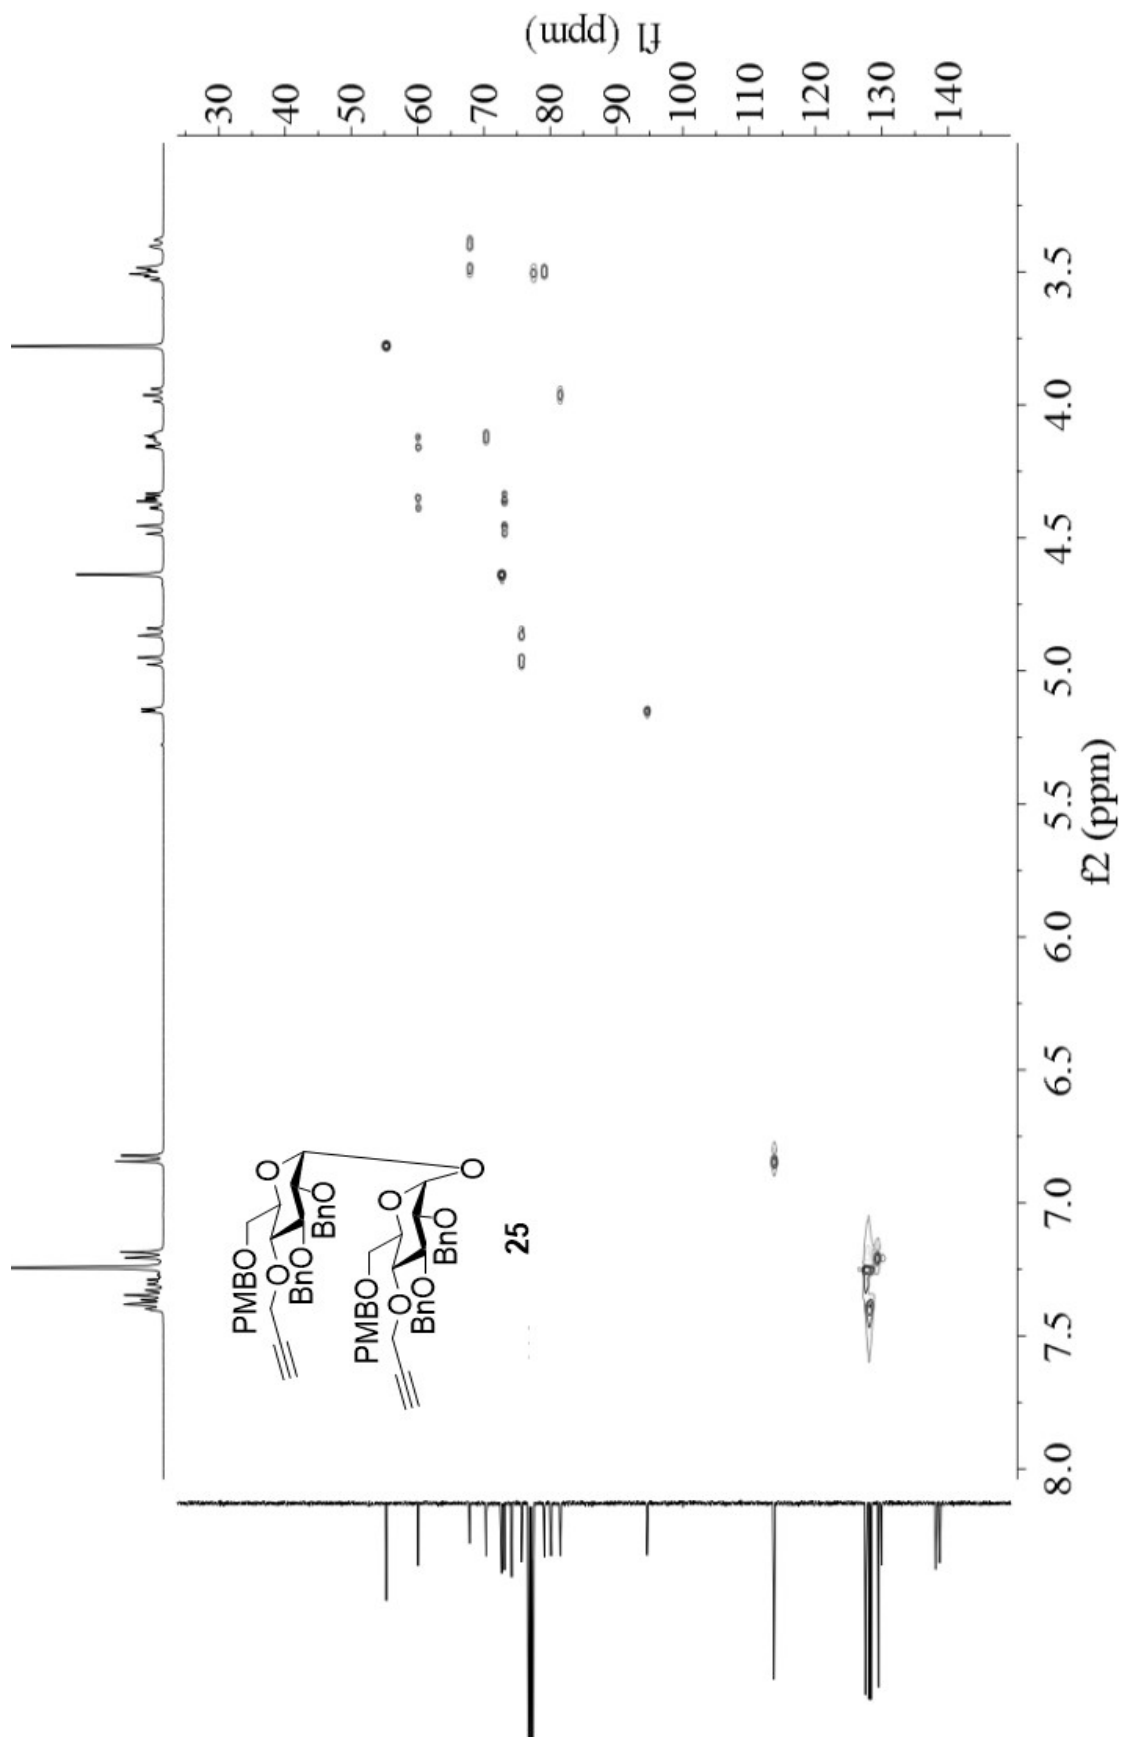

HSQC NMR Spectrum of compound **25** ( $\text{CDCl}_3$ , 400 MHz)

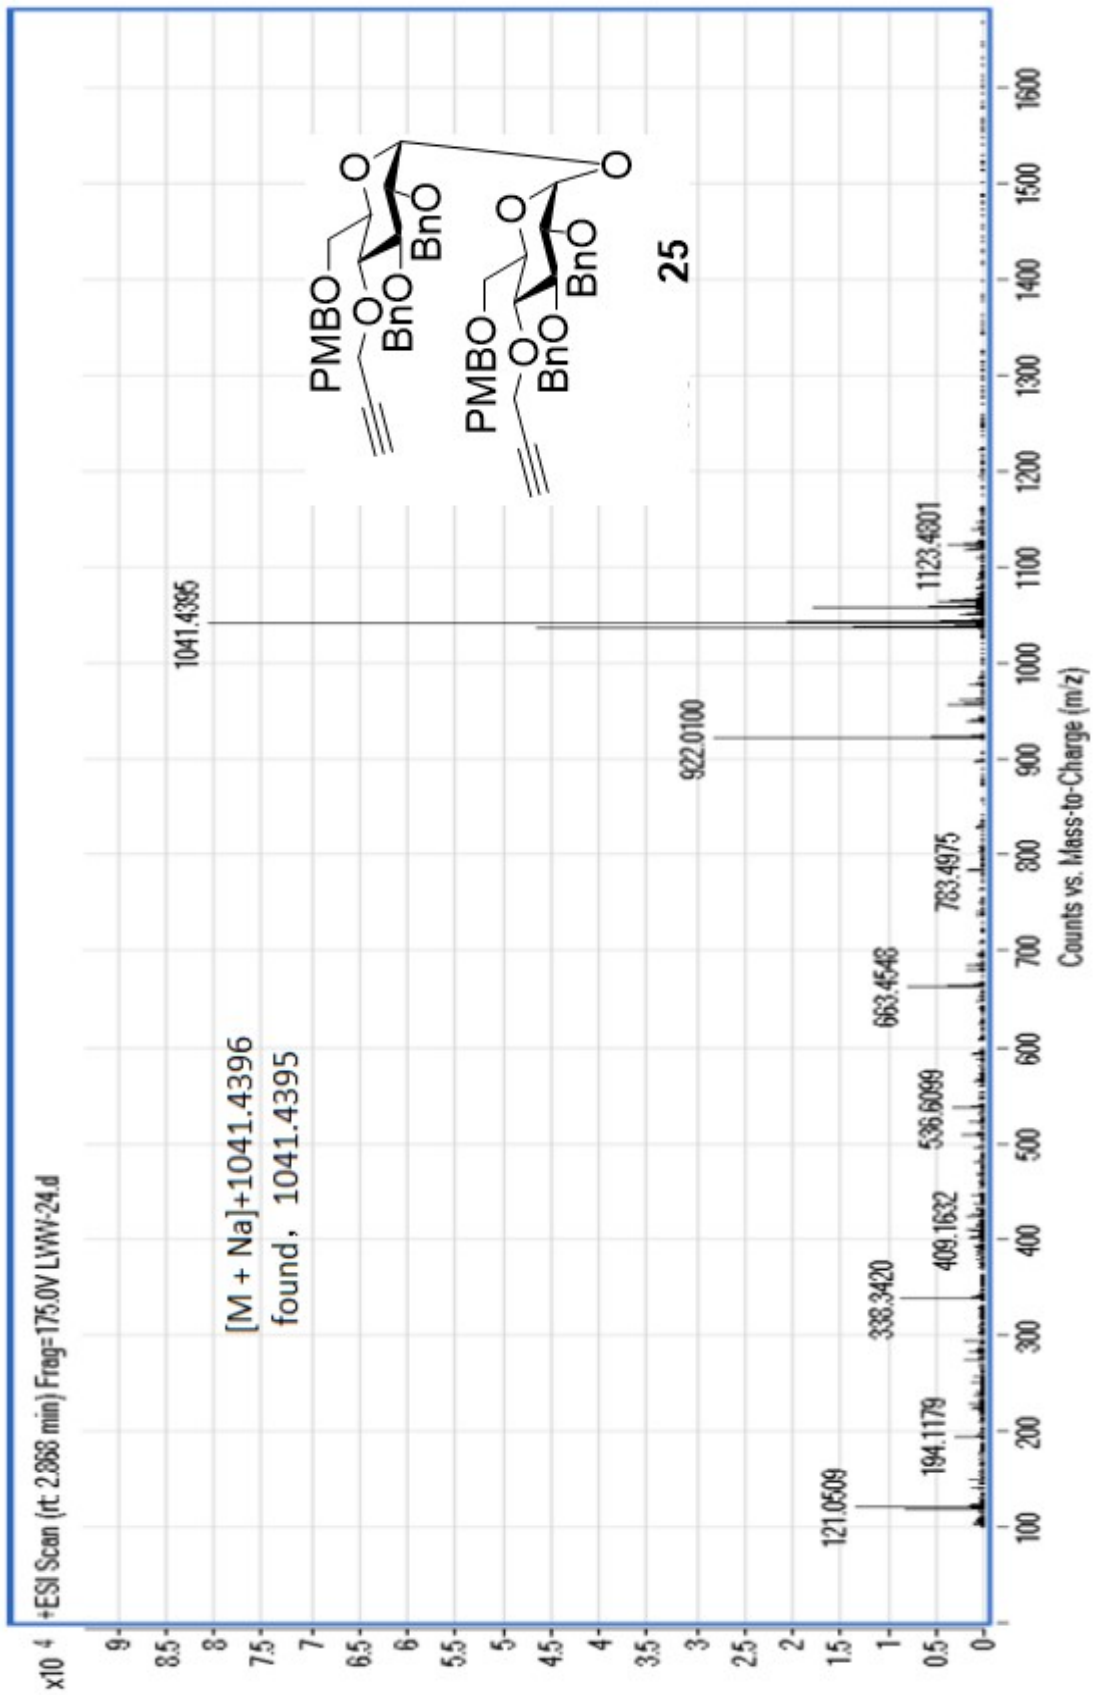

HR-ESI-MS spectrum of conjugate 25

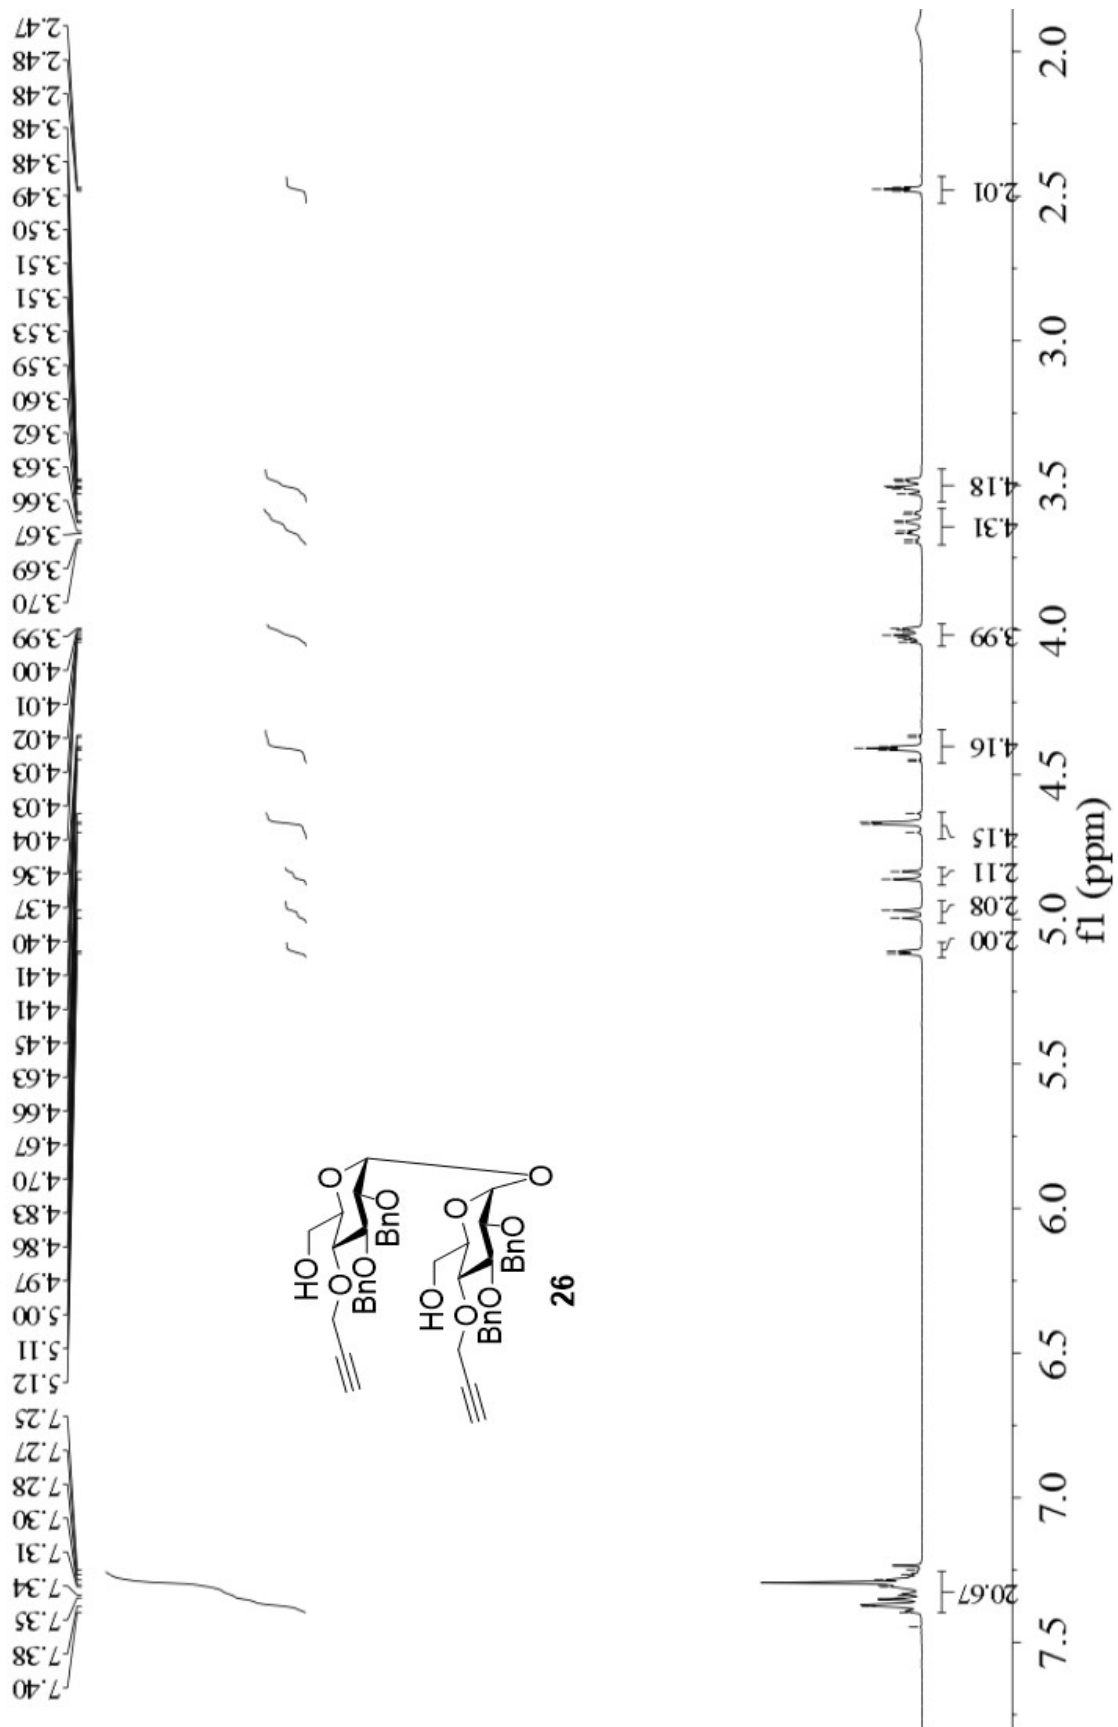

<sup>1</sup>H NMR Spectrum of compound **26** (CDCl<sub>3</sub>, 400 MHz)

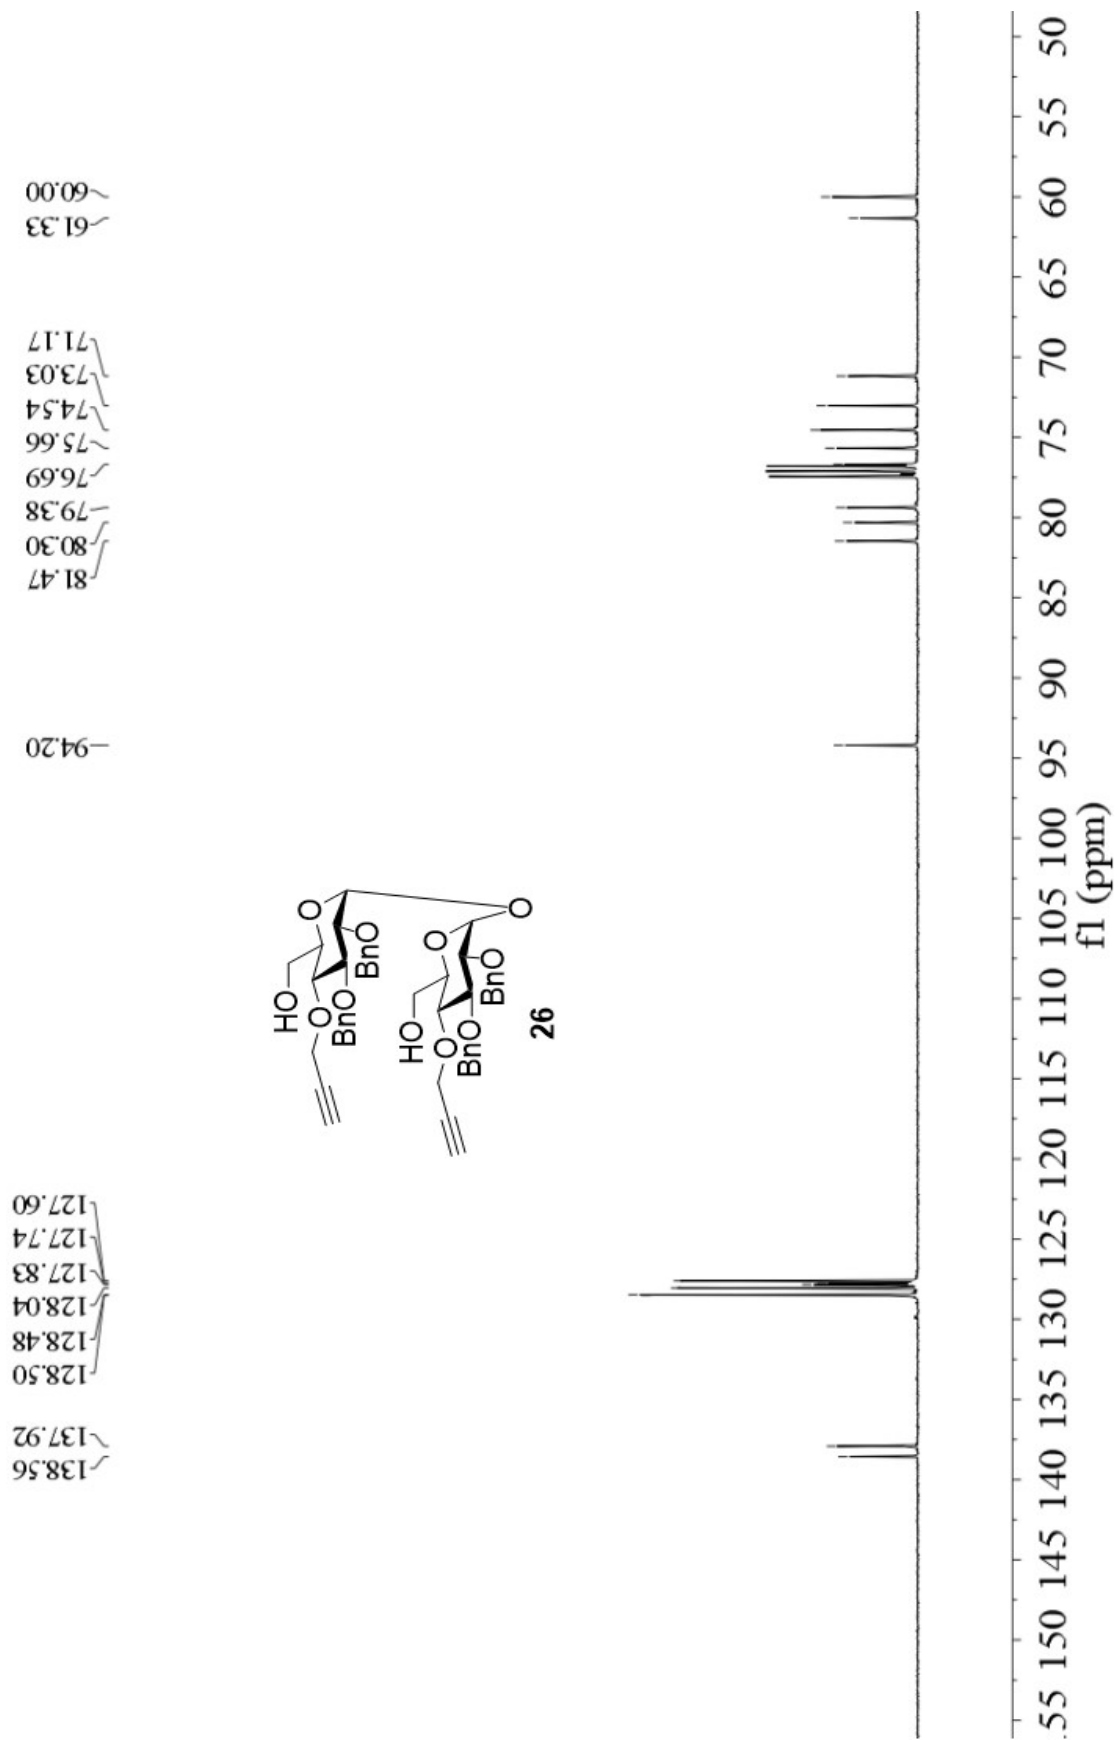

<sup>13</sup>C NMR Spectrum of compound **26** (CDCl<sub>3</sub>, 400 MHz)

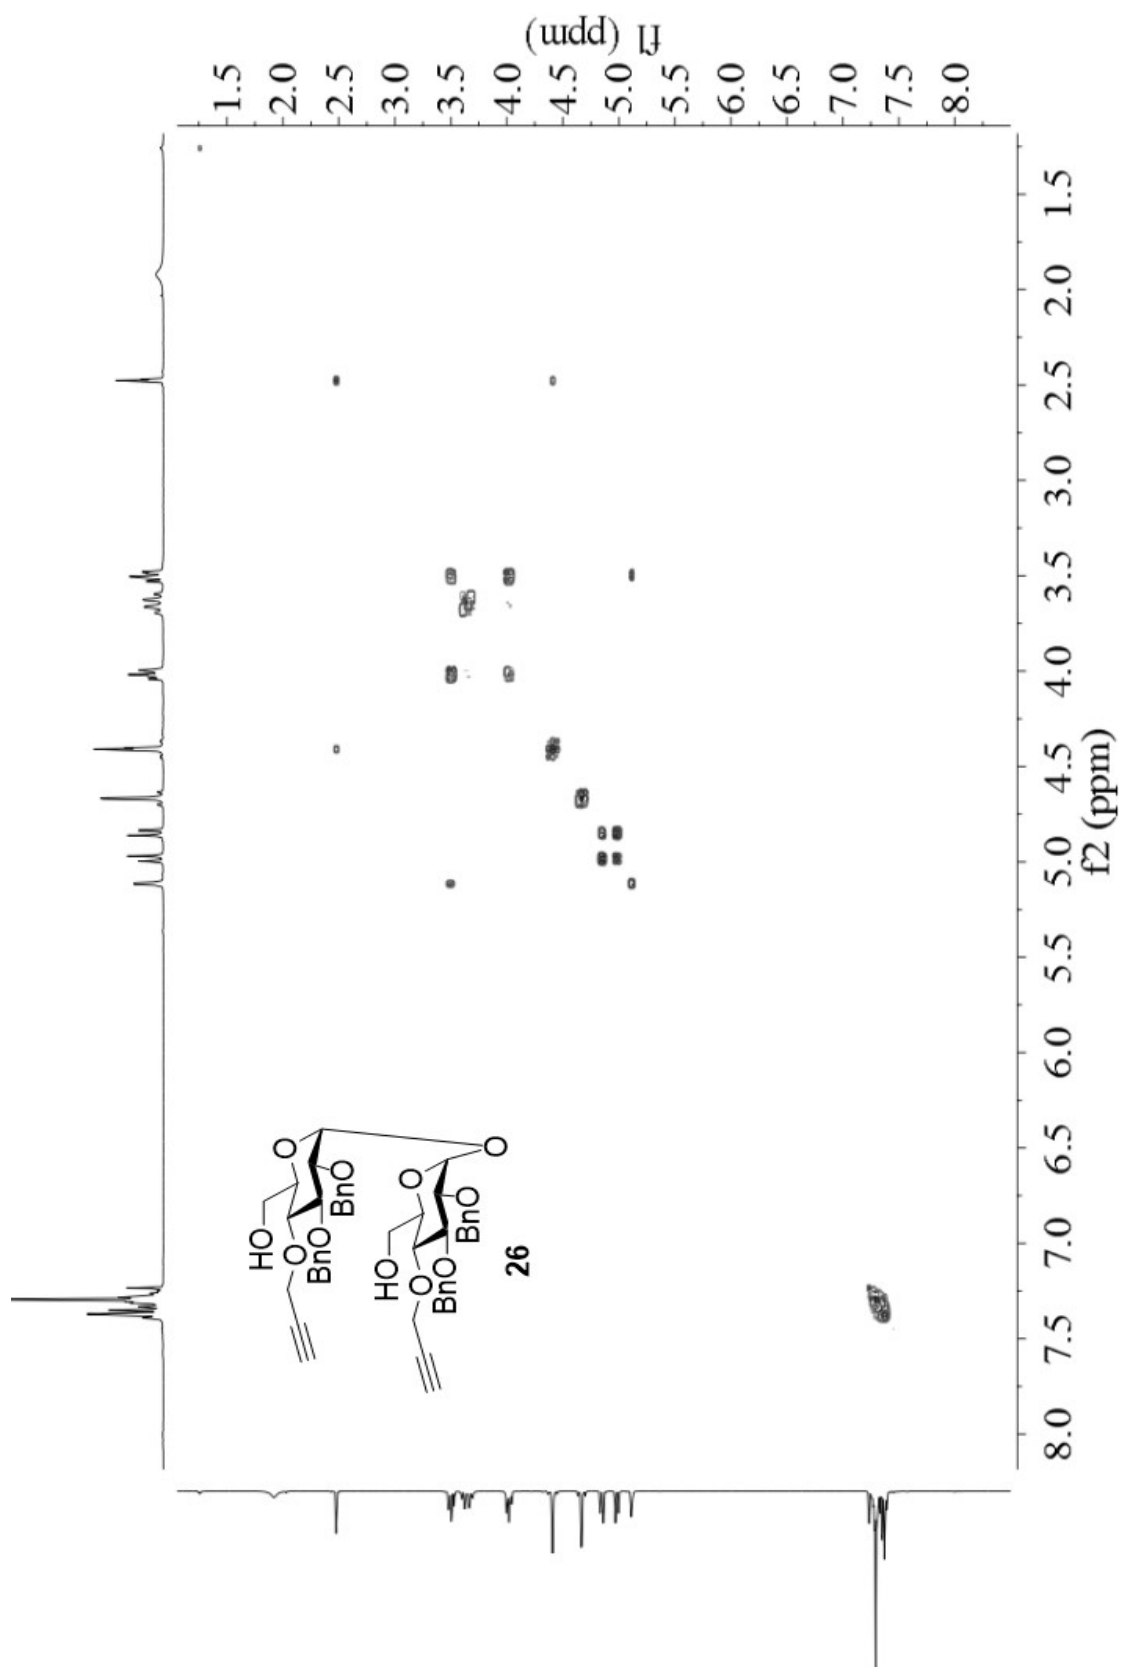

$^1\text{H}$ - $^1\text{H}$  COSY NMR Spectrum of compound **26** ( $\text{CDCl}_3$ , 400 MHz)



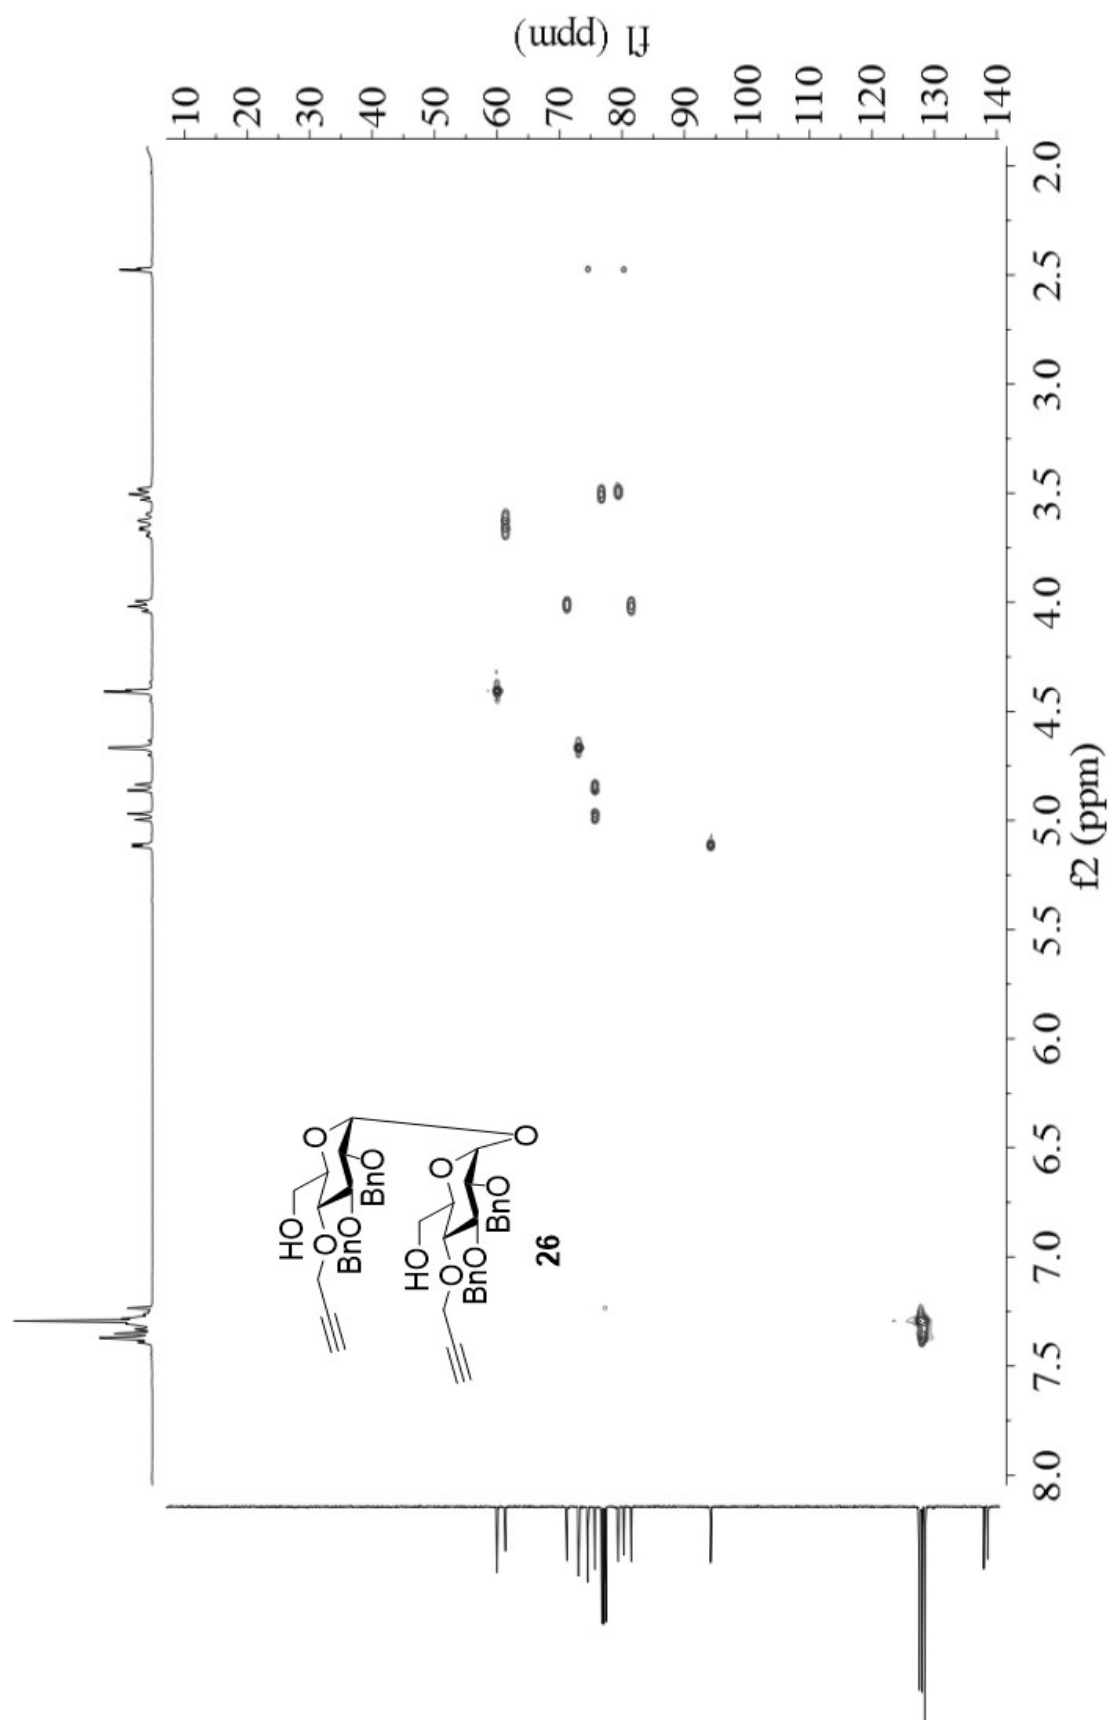

HSQC NMR Spectrum of compound **26** ( $\text{CDCl}_3$ , 400 MHz)

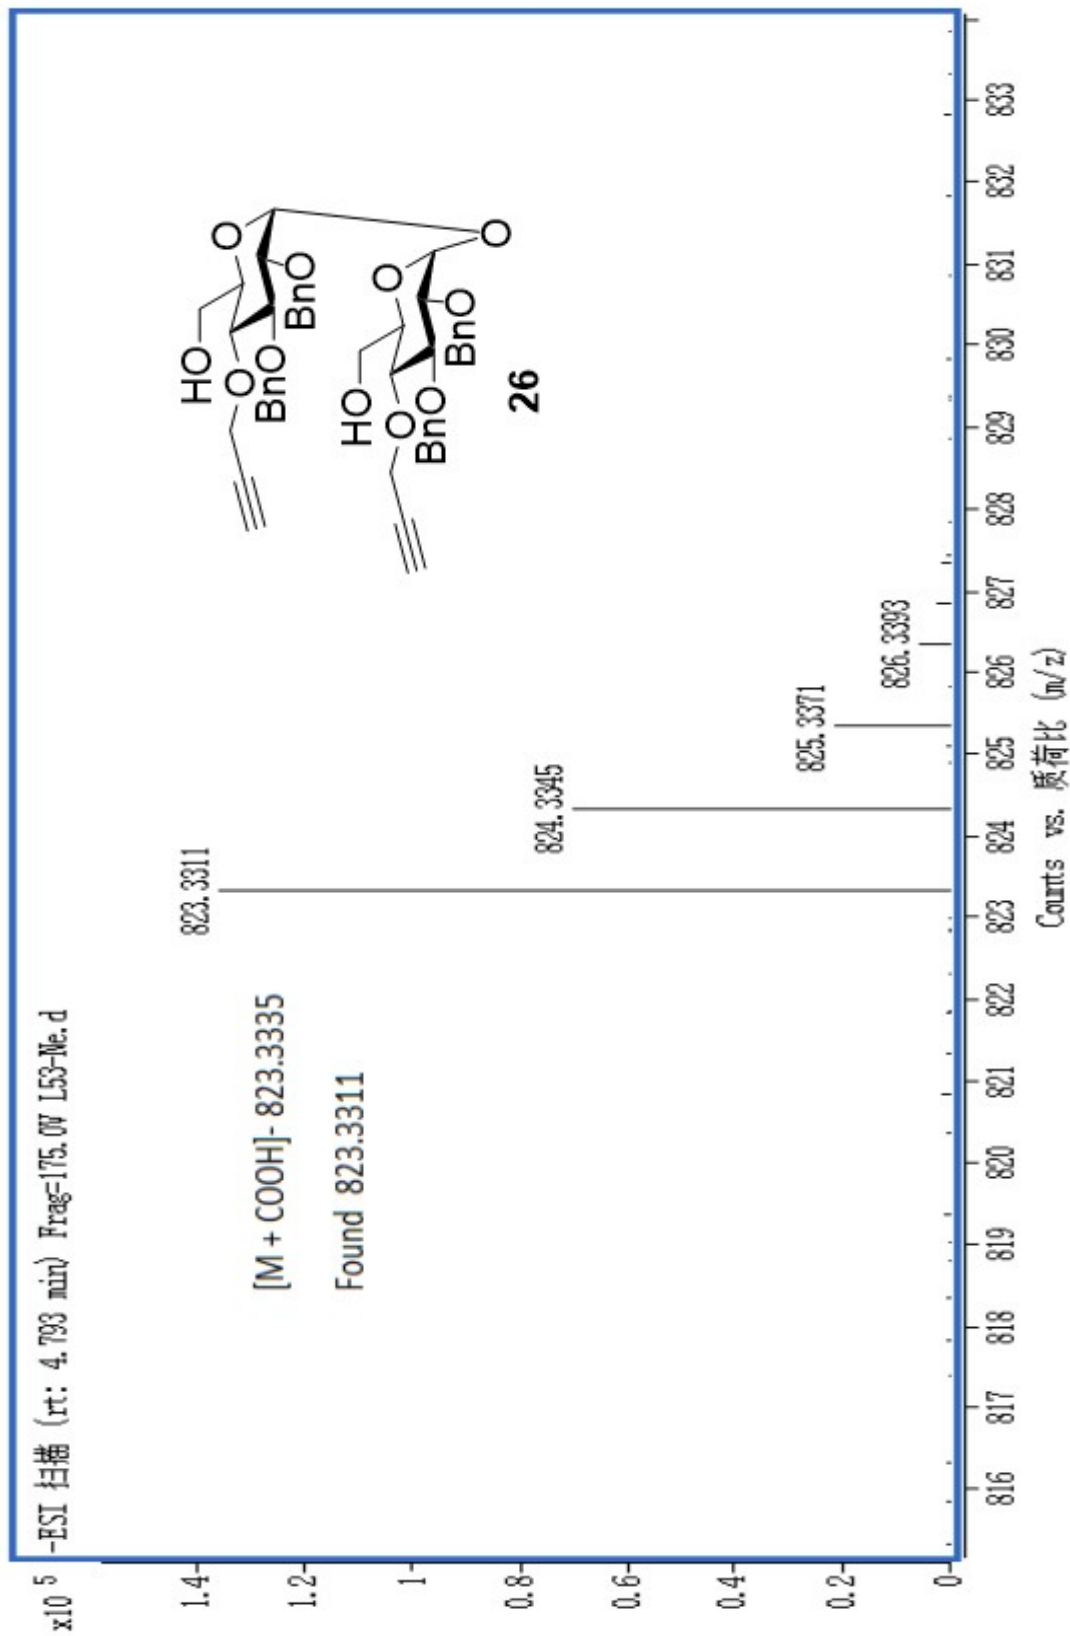

HR-ESI-MS spectrum of conjugate **26**

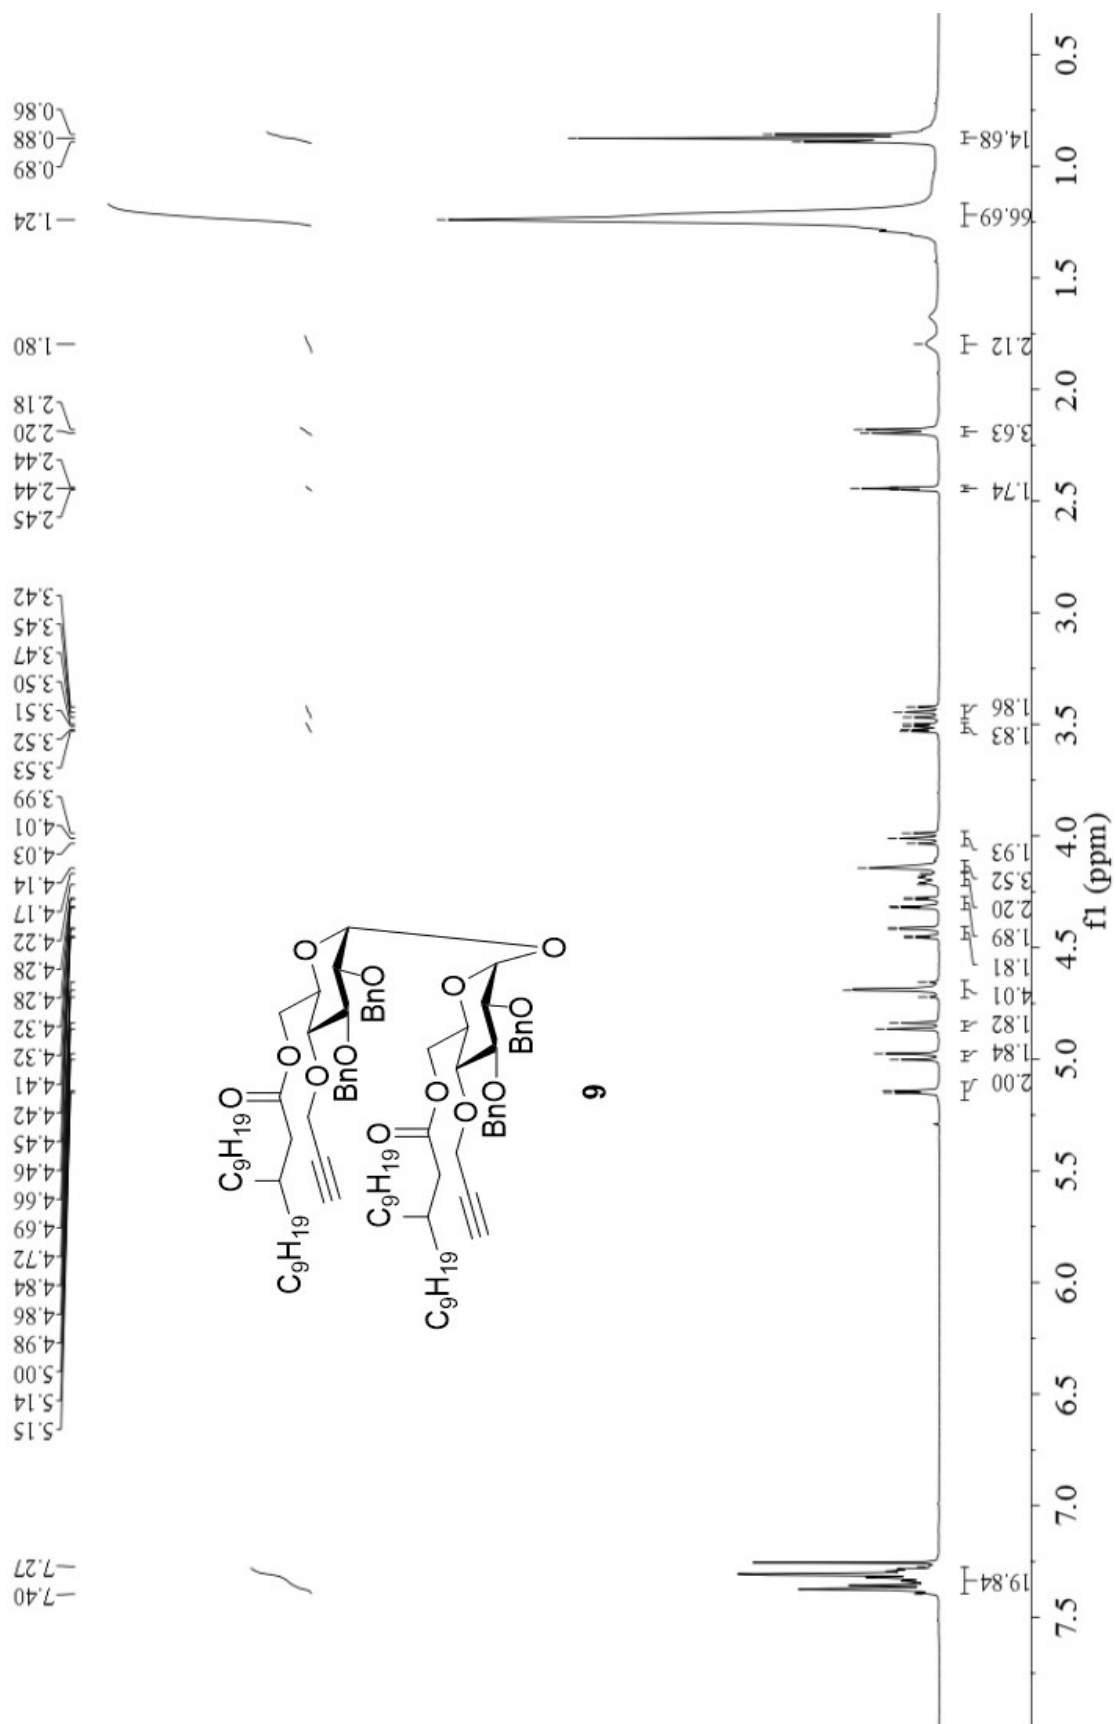

$^1\text{H}$  NMR Spectrum of compound **9** ( $\text{CDCl}_3$ , 400 MHz)

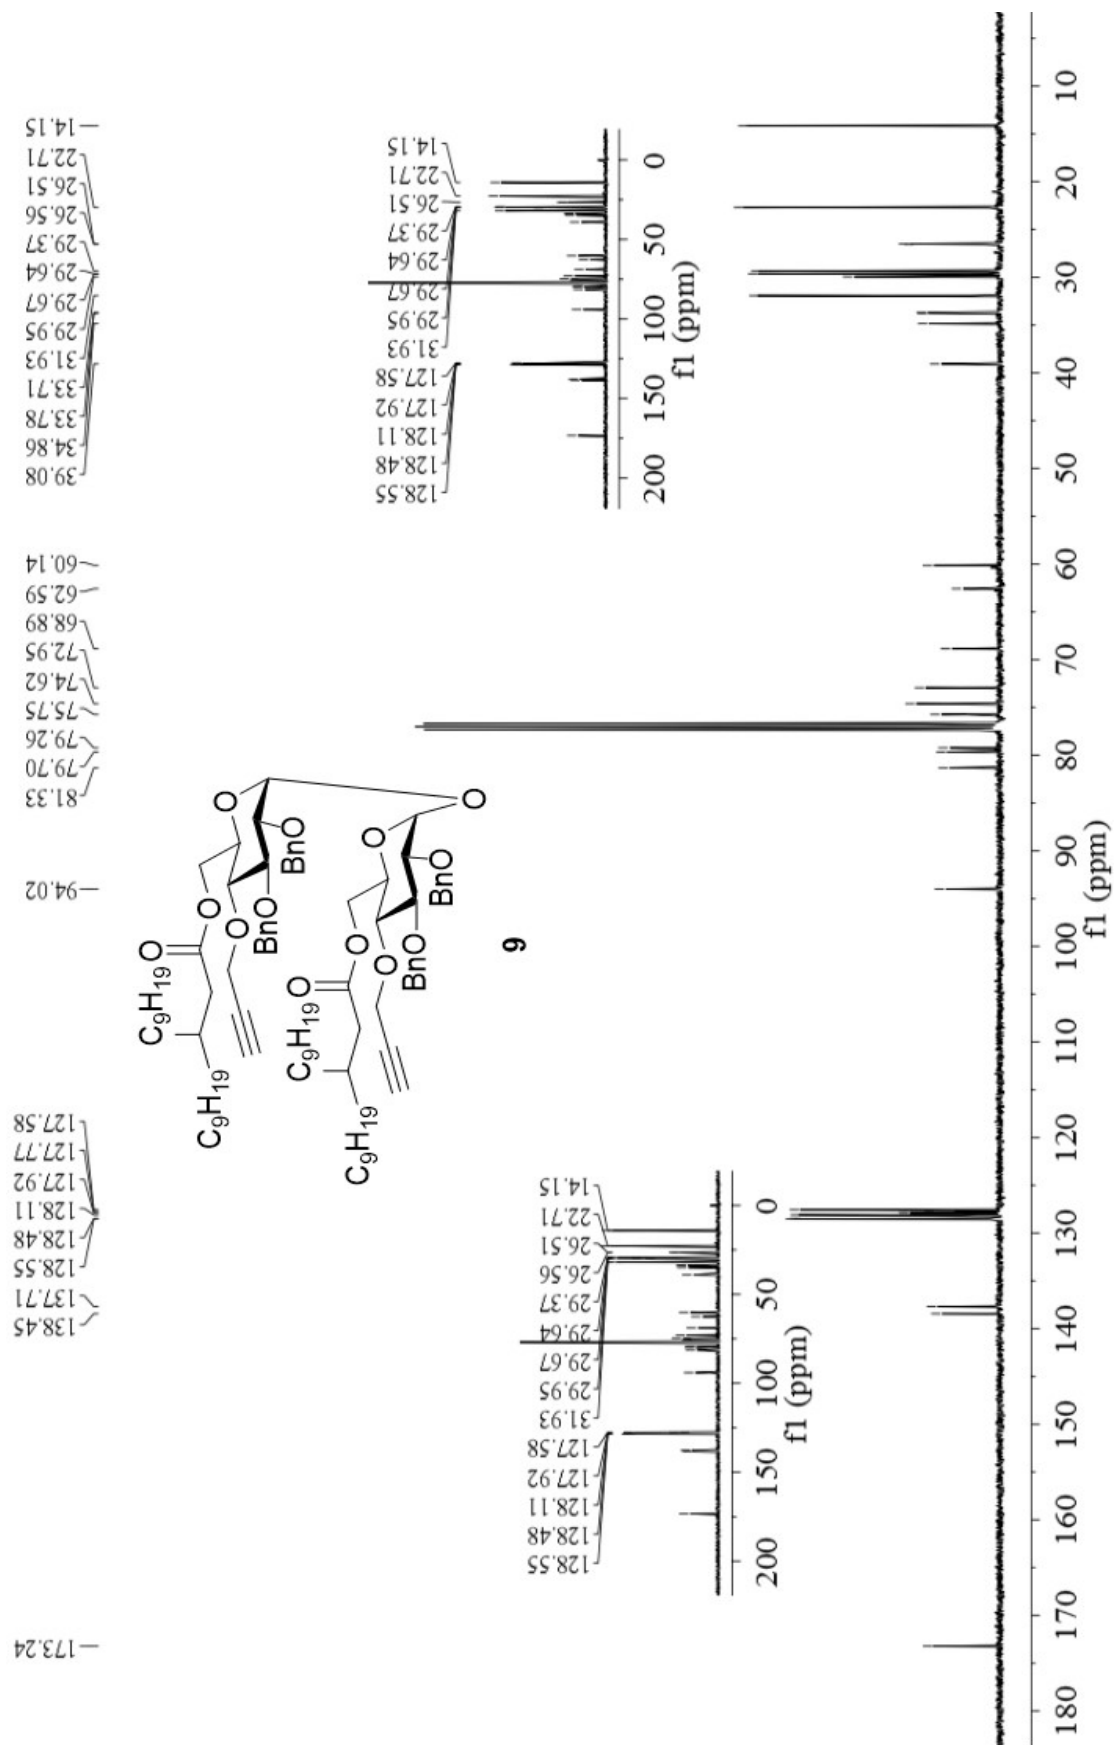

$^{13}C$  NMR Spectrum of compound **9** ( $CDCl_3$ , 400 MHz)

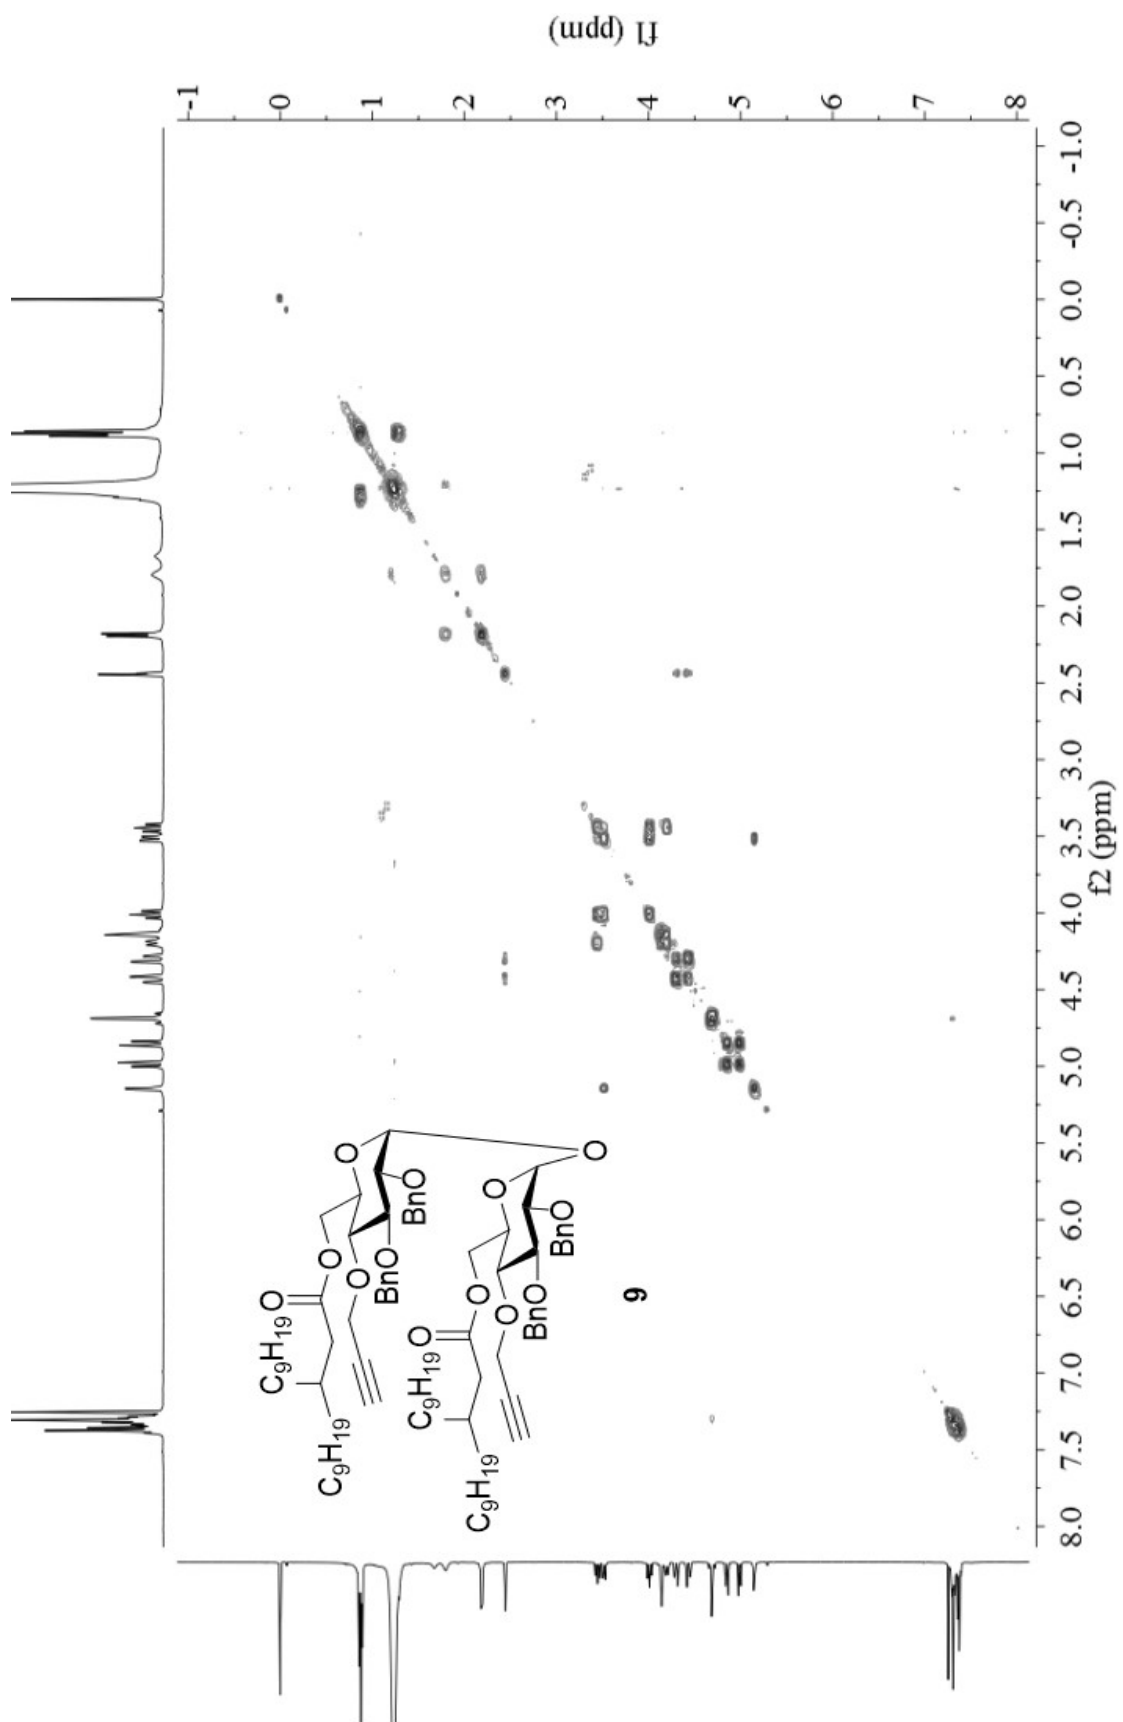

$^1\text{H}$ - $^1\text{H}$  COSY NMR Spectrum of compound **9** ( $\text{CDCl}_3$ , 400 MHz)

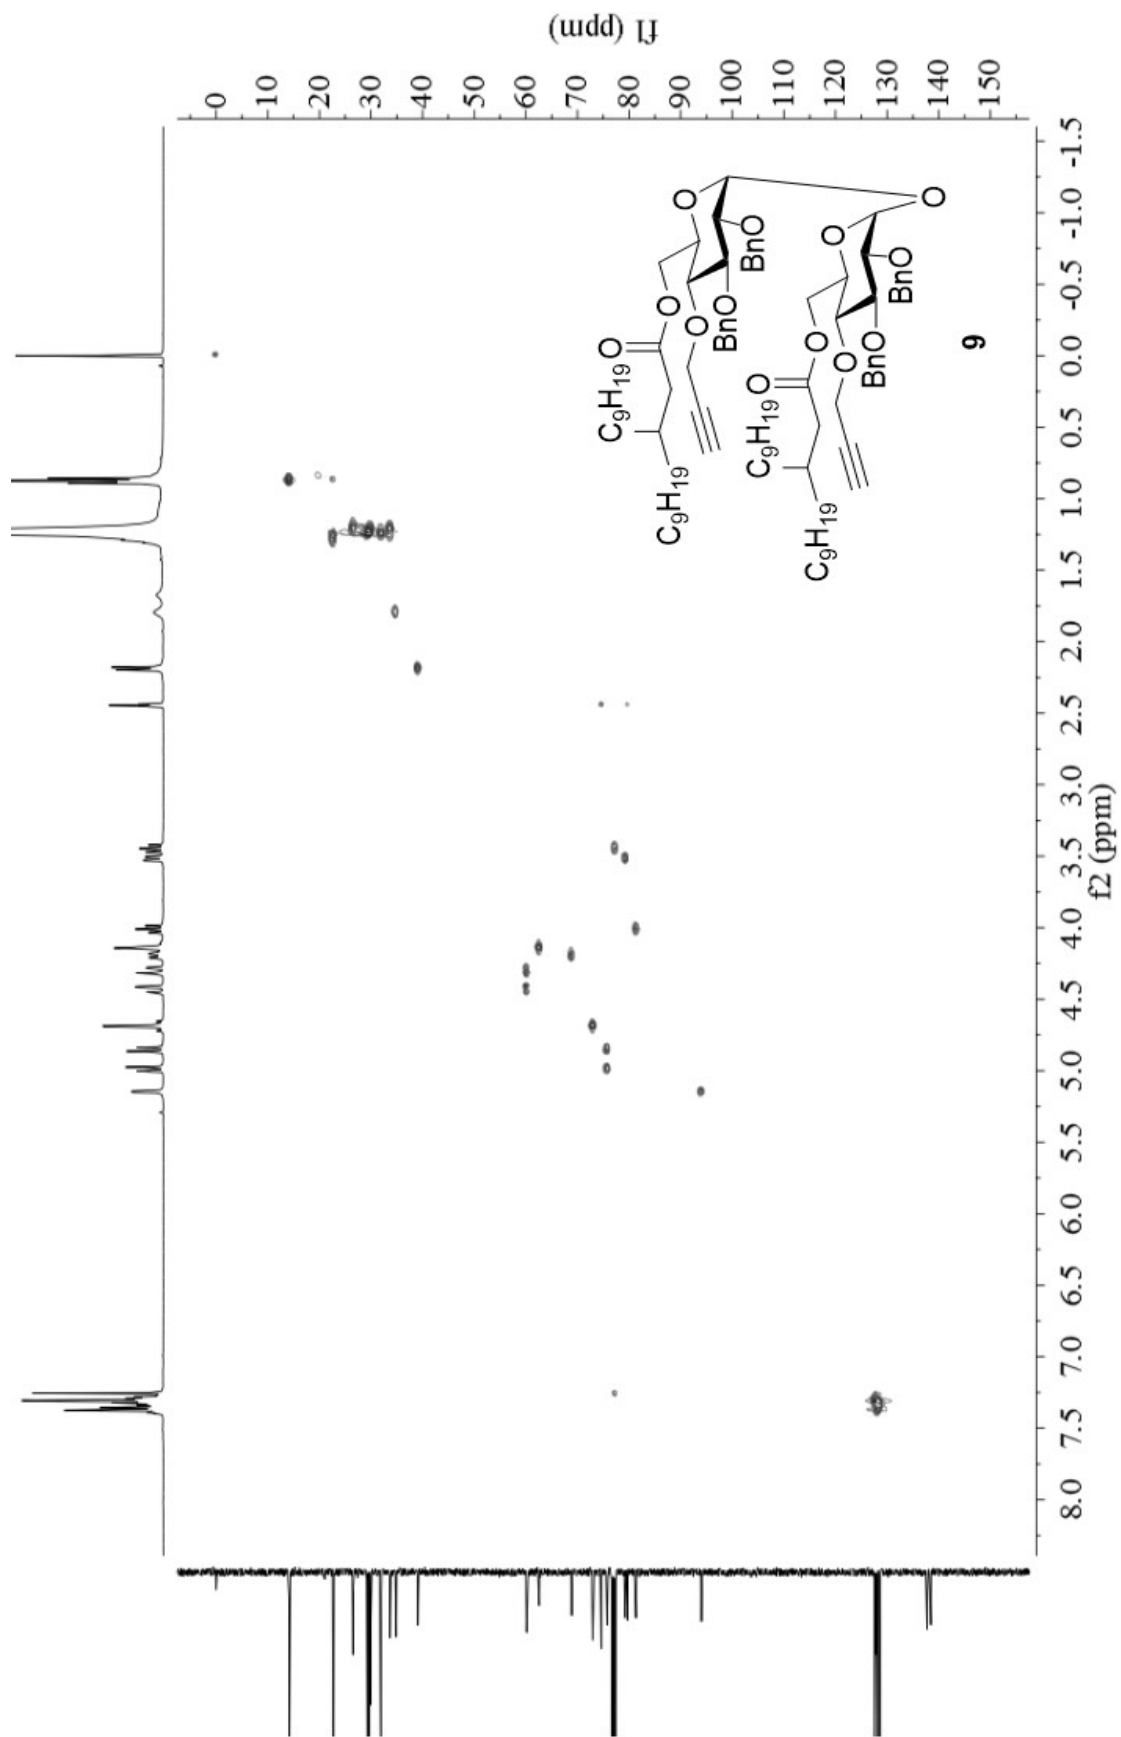

HSQC NMR Spectrum of compound **9** ( $\text{CDCl}_3$ , 400 MHz)

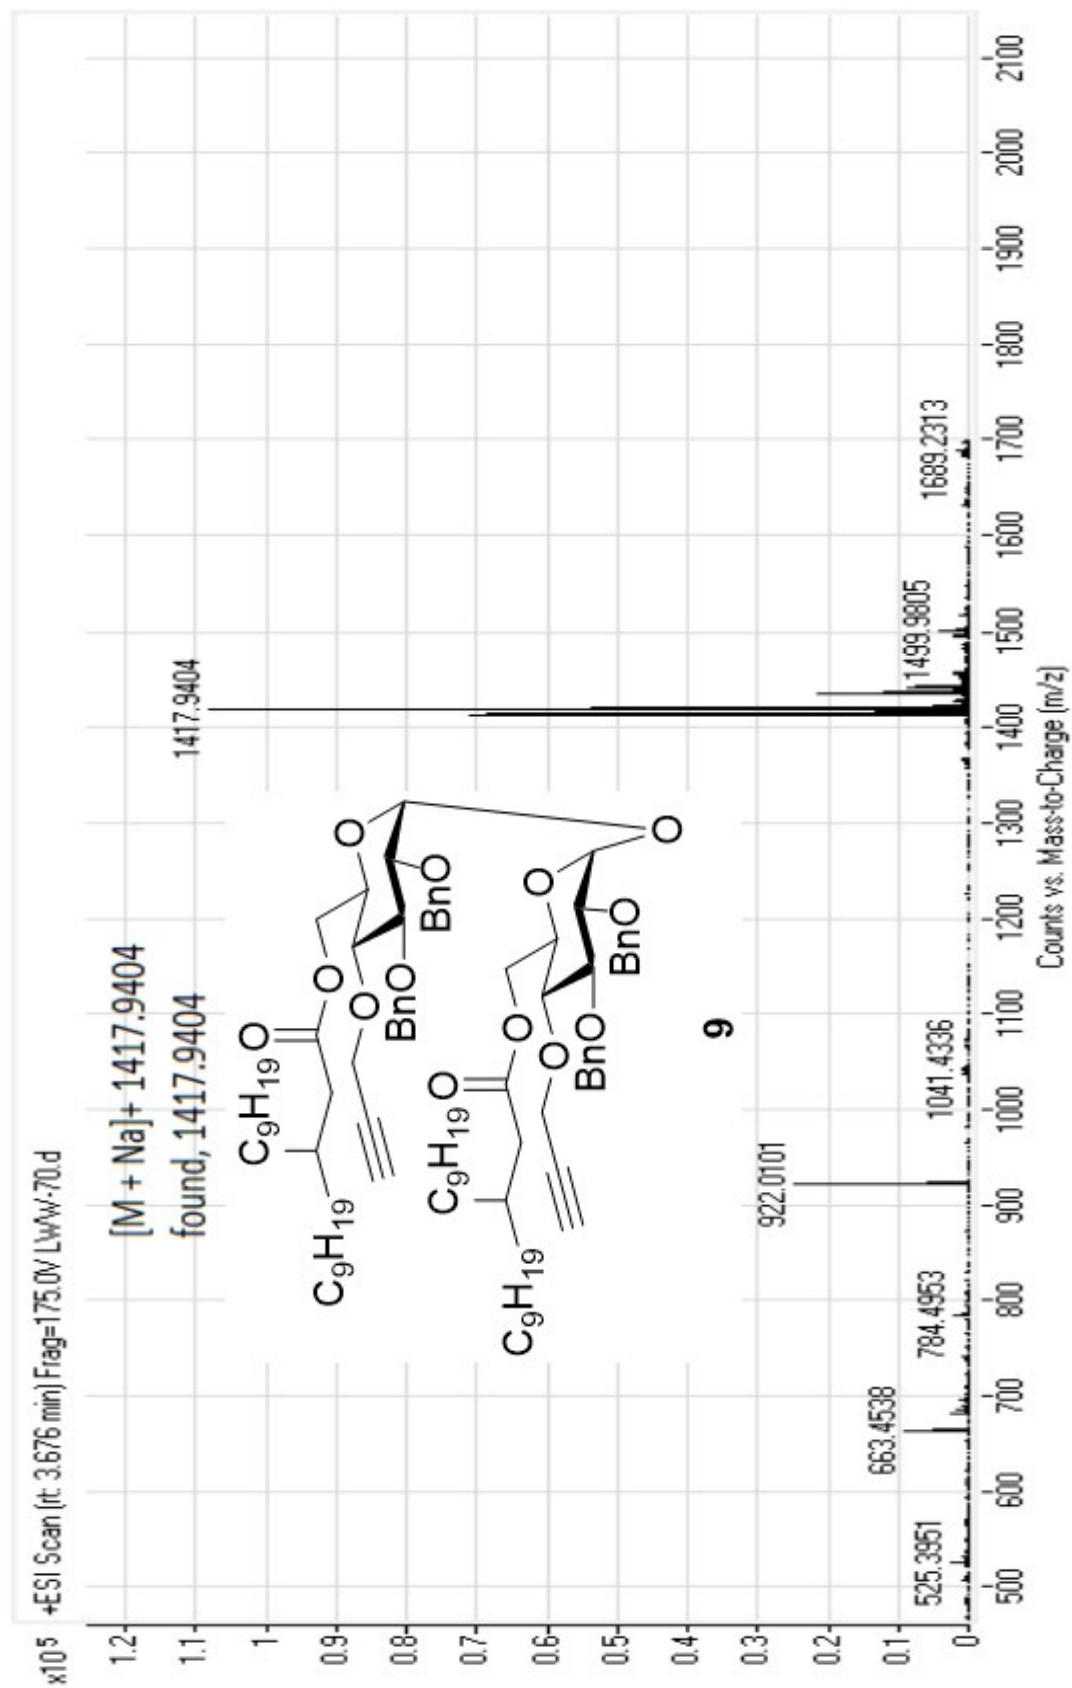

HR-ESI-MS spectrum of conjugate 9

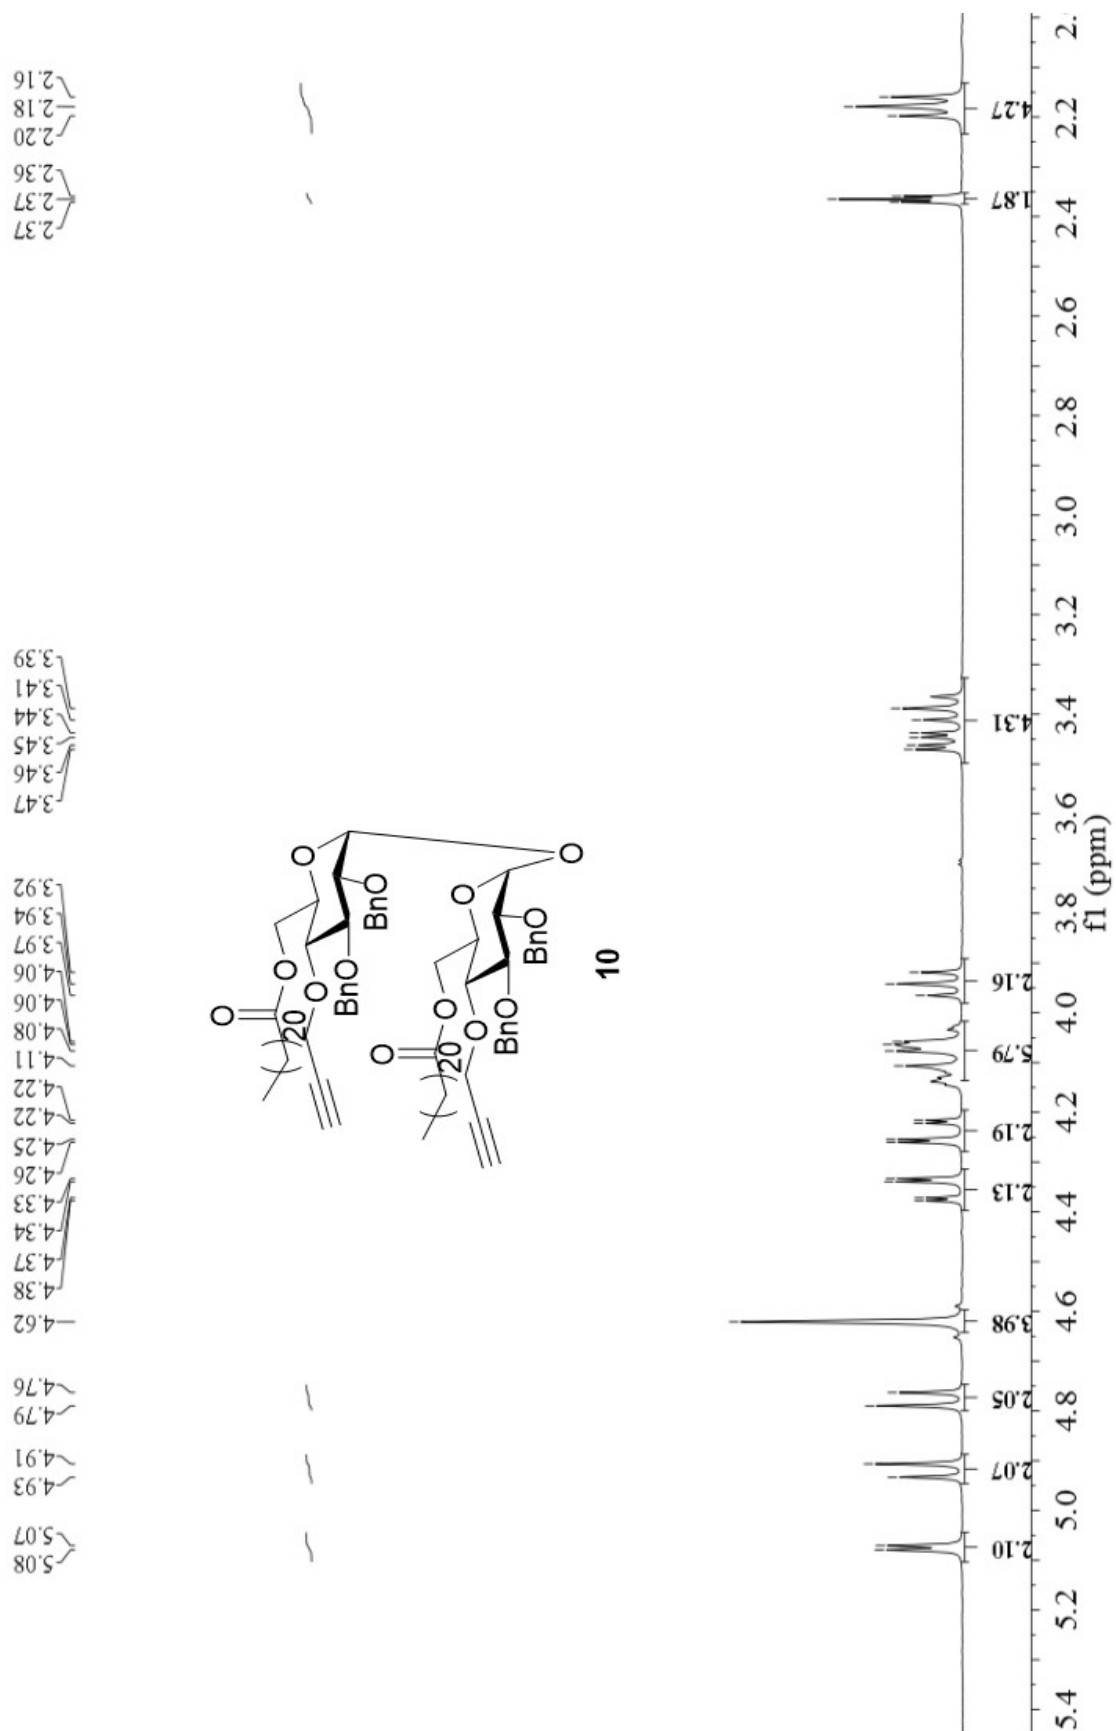

$^1\text{H}$  NMR Spectrum of compound **10** (CDCl<sub>3</sub>, 400 MHz)



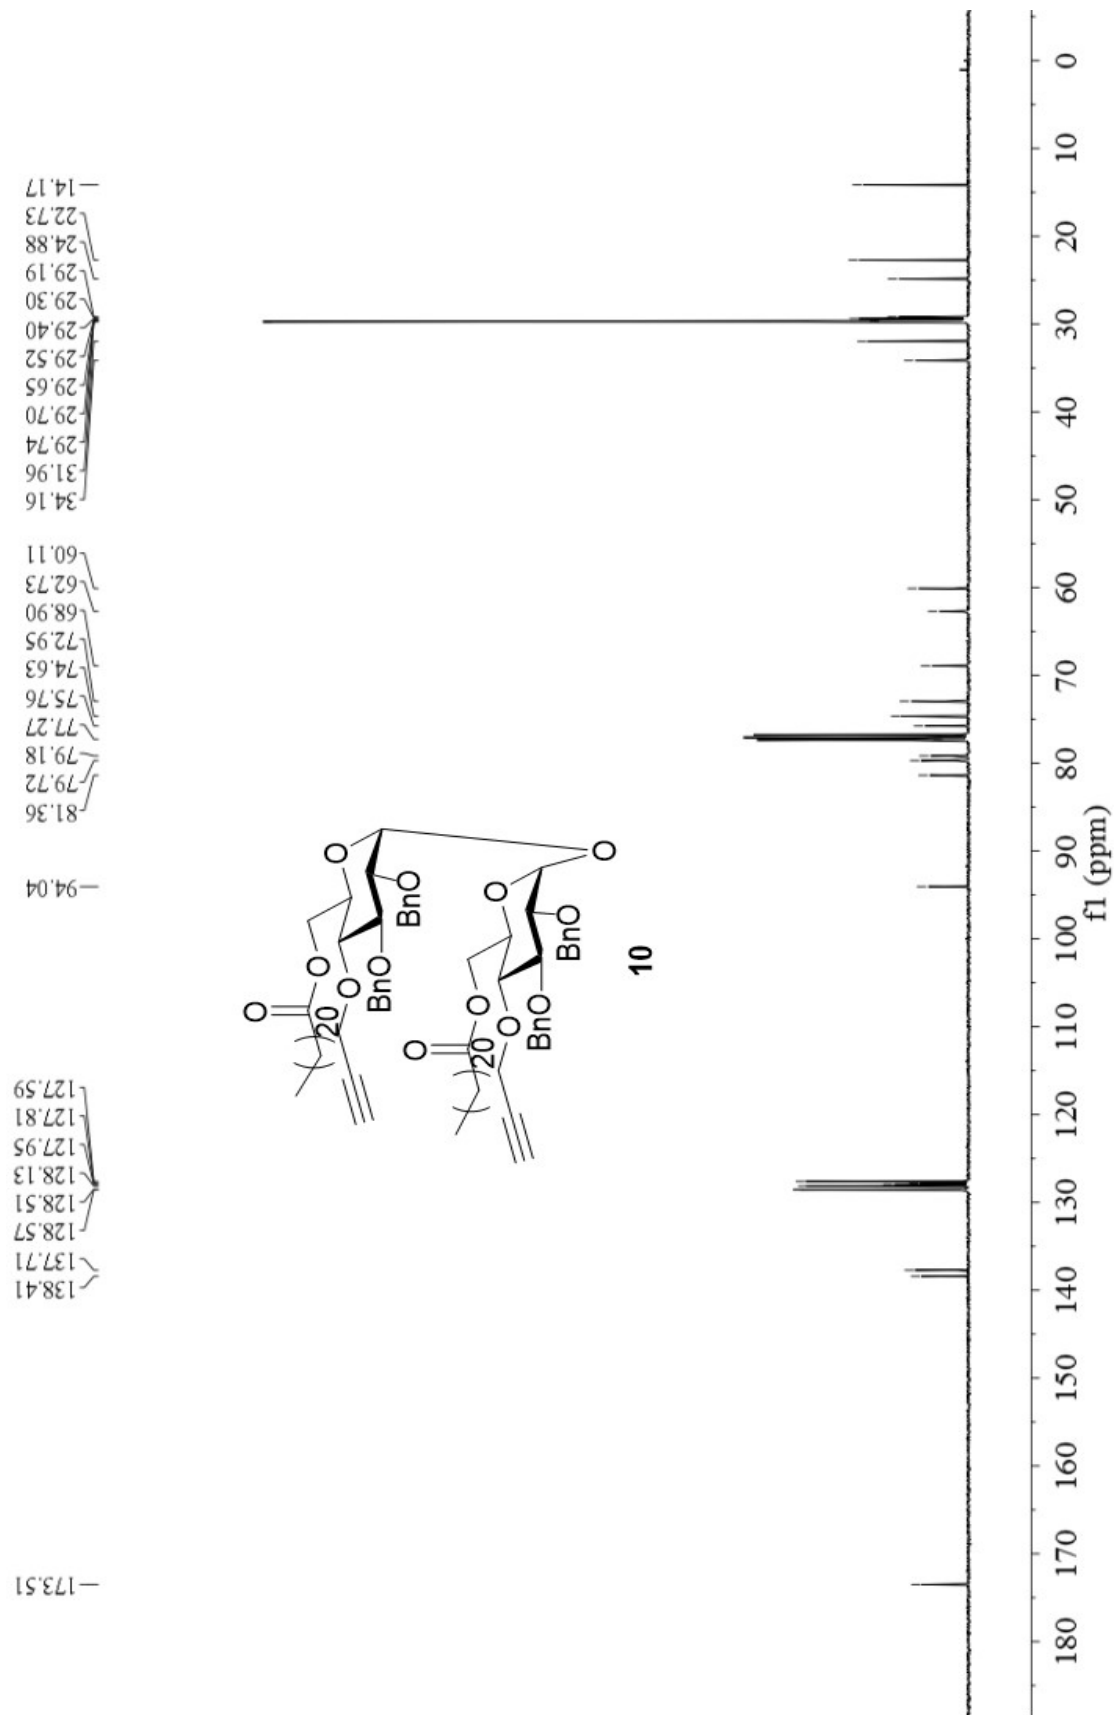

$^{13}\text{C}$  NMR Spectrum of compound **10** ( $\text{CDCl}_3$ , 400 MHz)

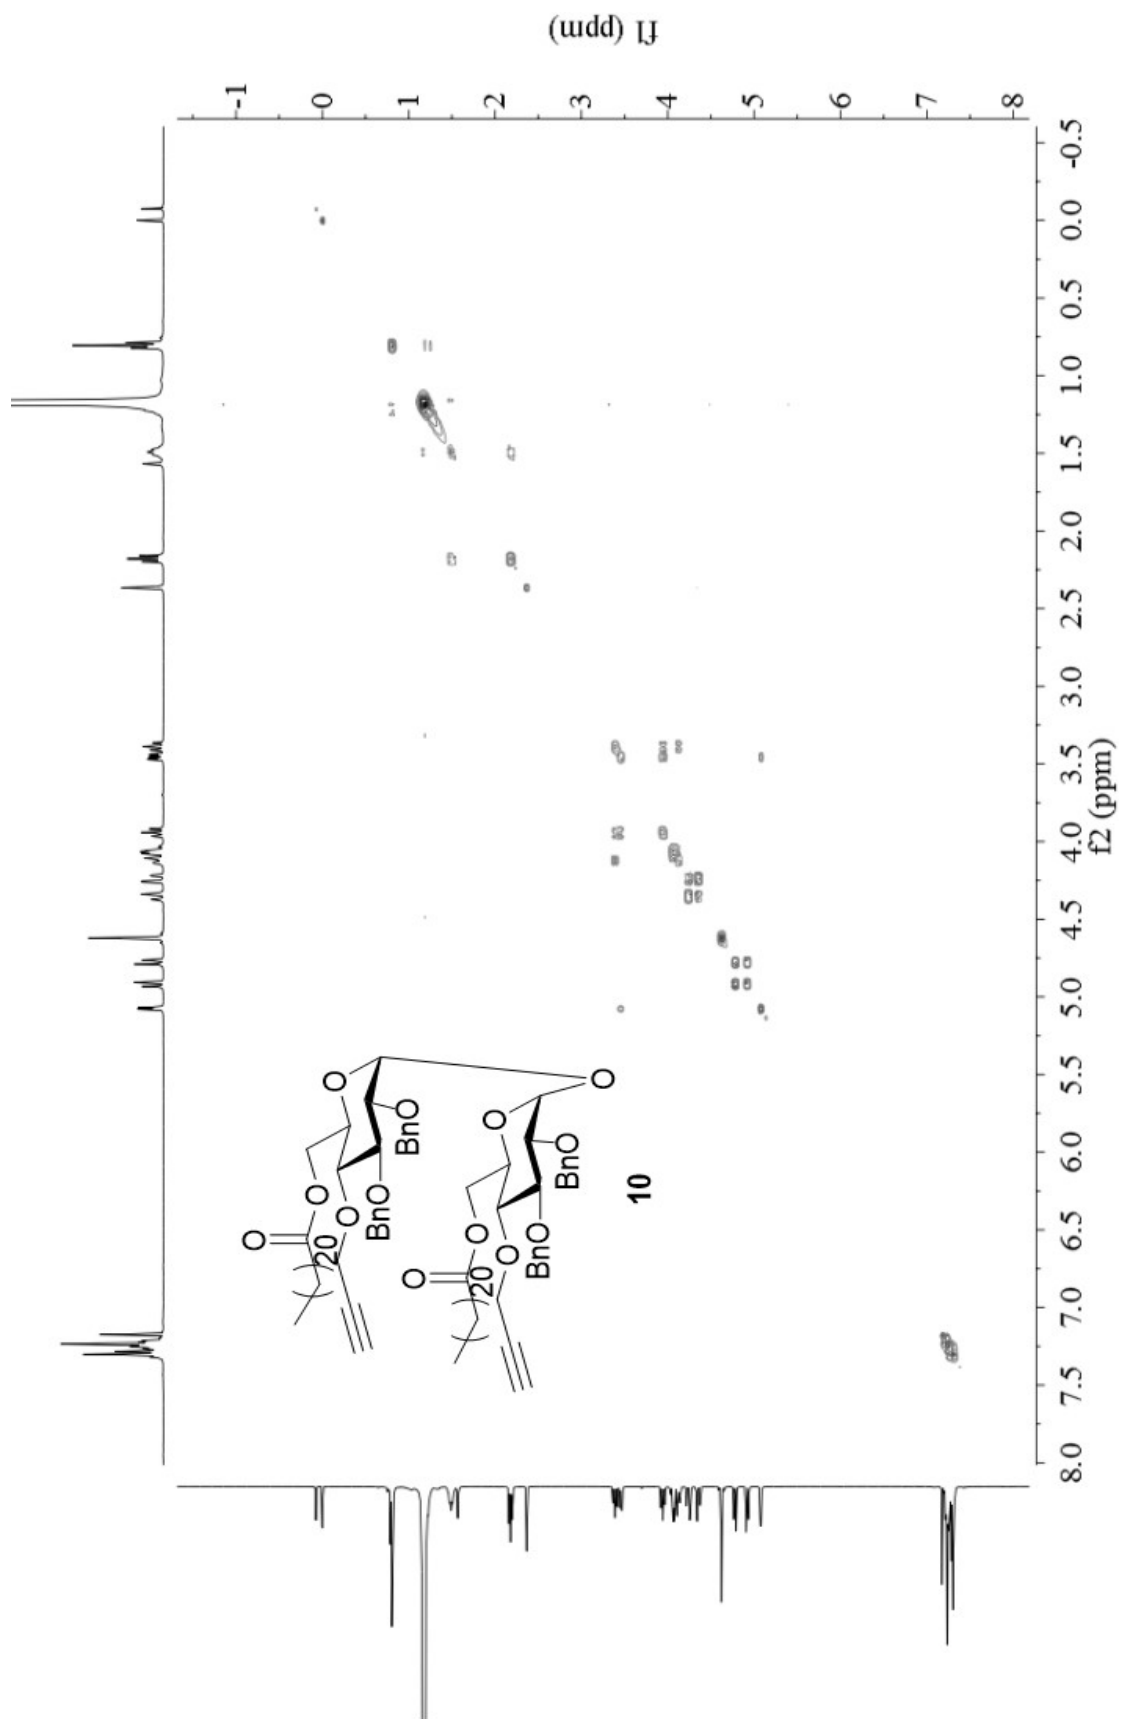

$^1\text{H}$ - $^1\text{H}$  COSY NMR Spectrum of compound **10** ( $\text{CDCl}_3$ , 400 MHz)

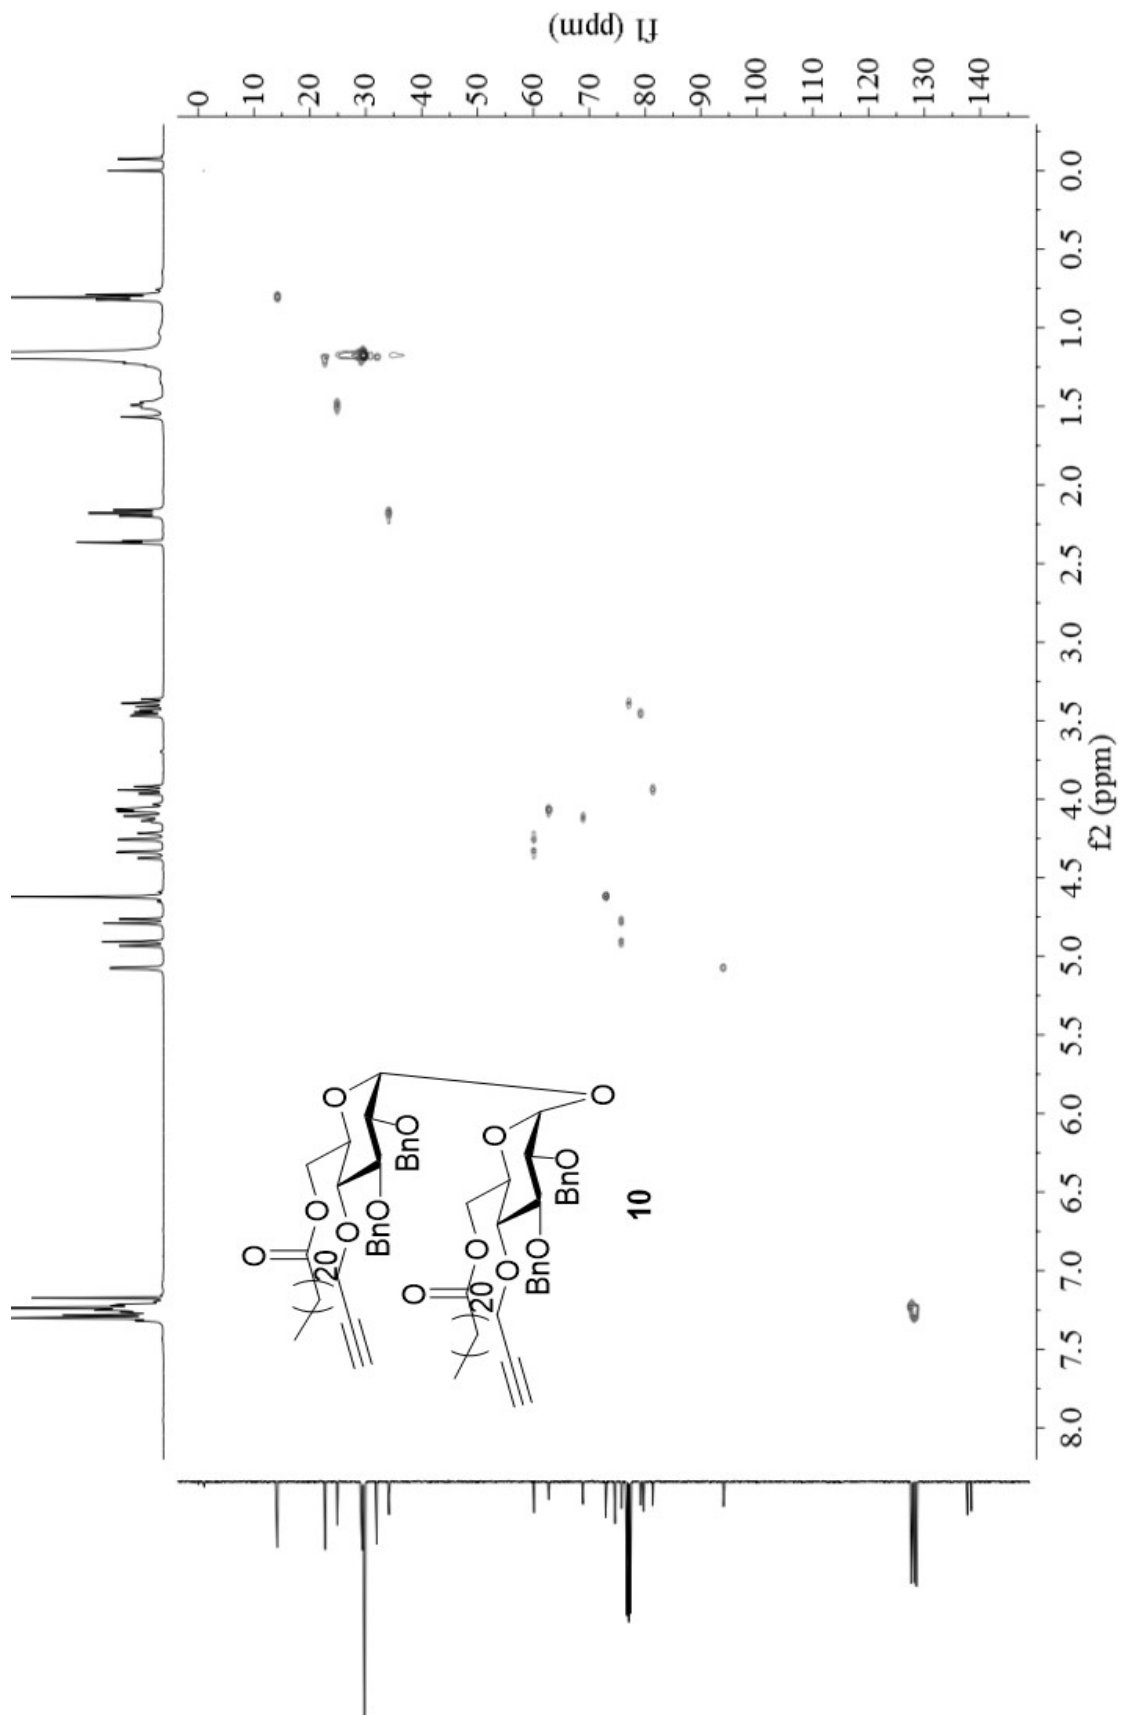

HSQC NMR Spectrum of compound **10** (CDCl<sub>3</sub>, 400 MHz)

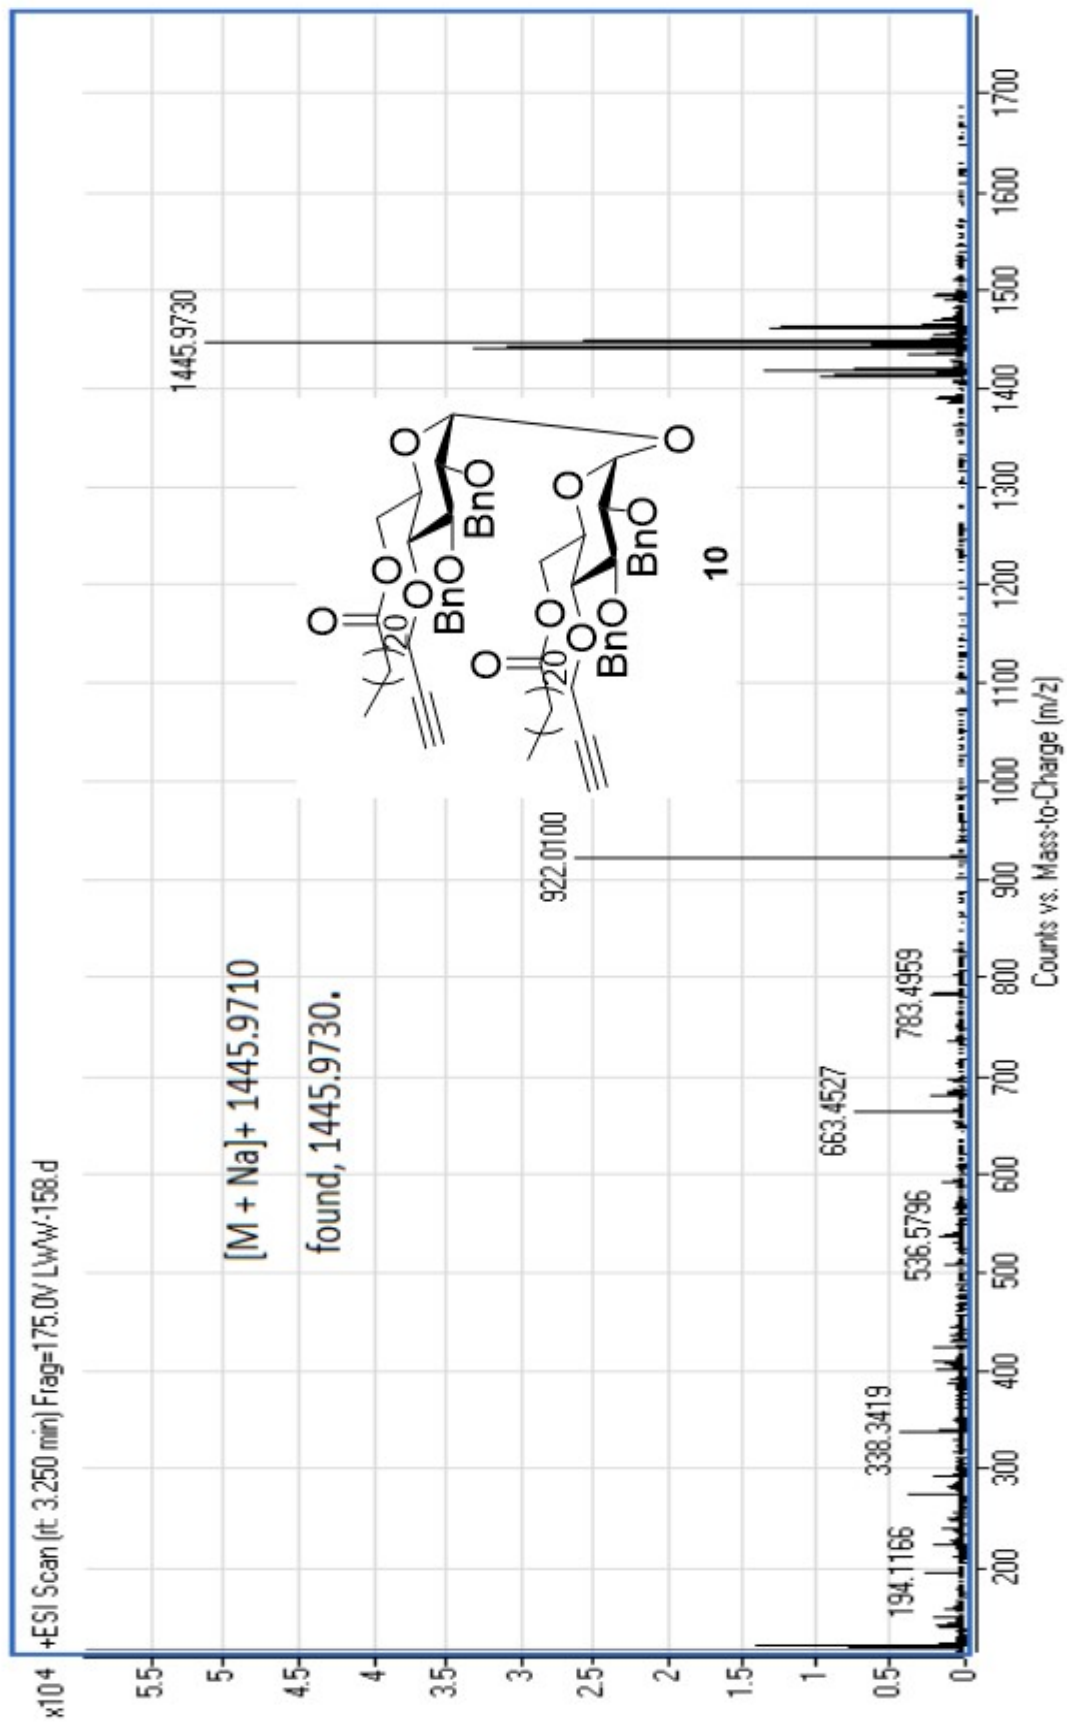

HR-ESI-MS spectrum of conjugate 10

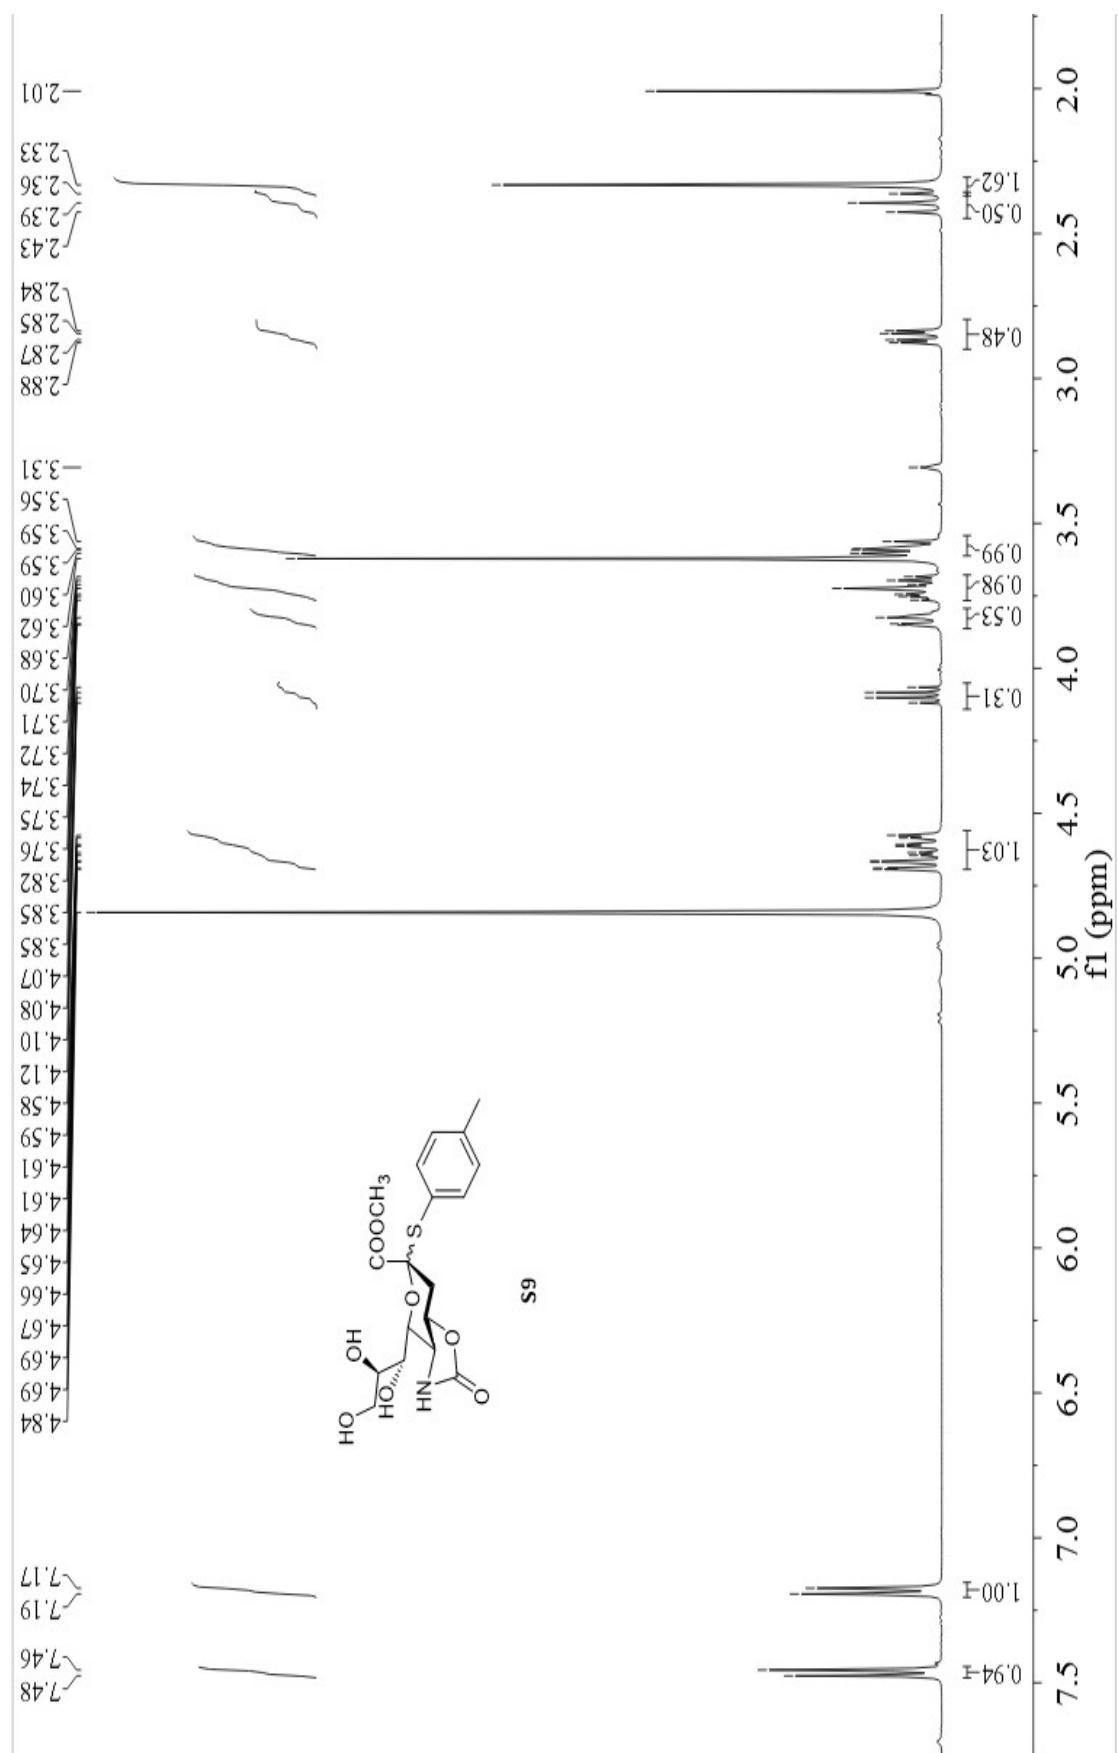

<sup>1</sup>H NMR Spectrum of compound **S9** (MeOD, 400 MHz)

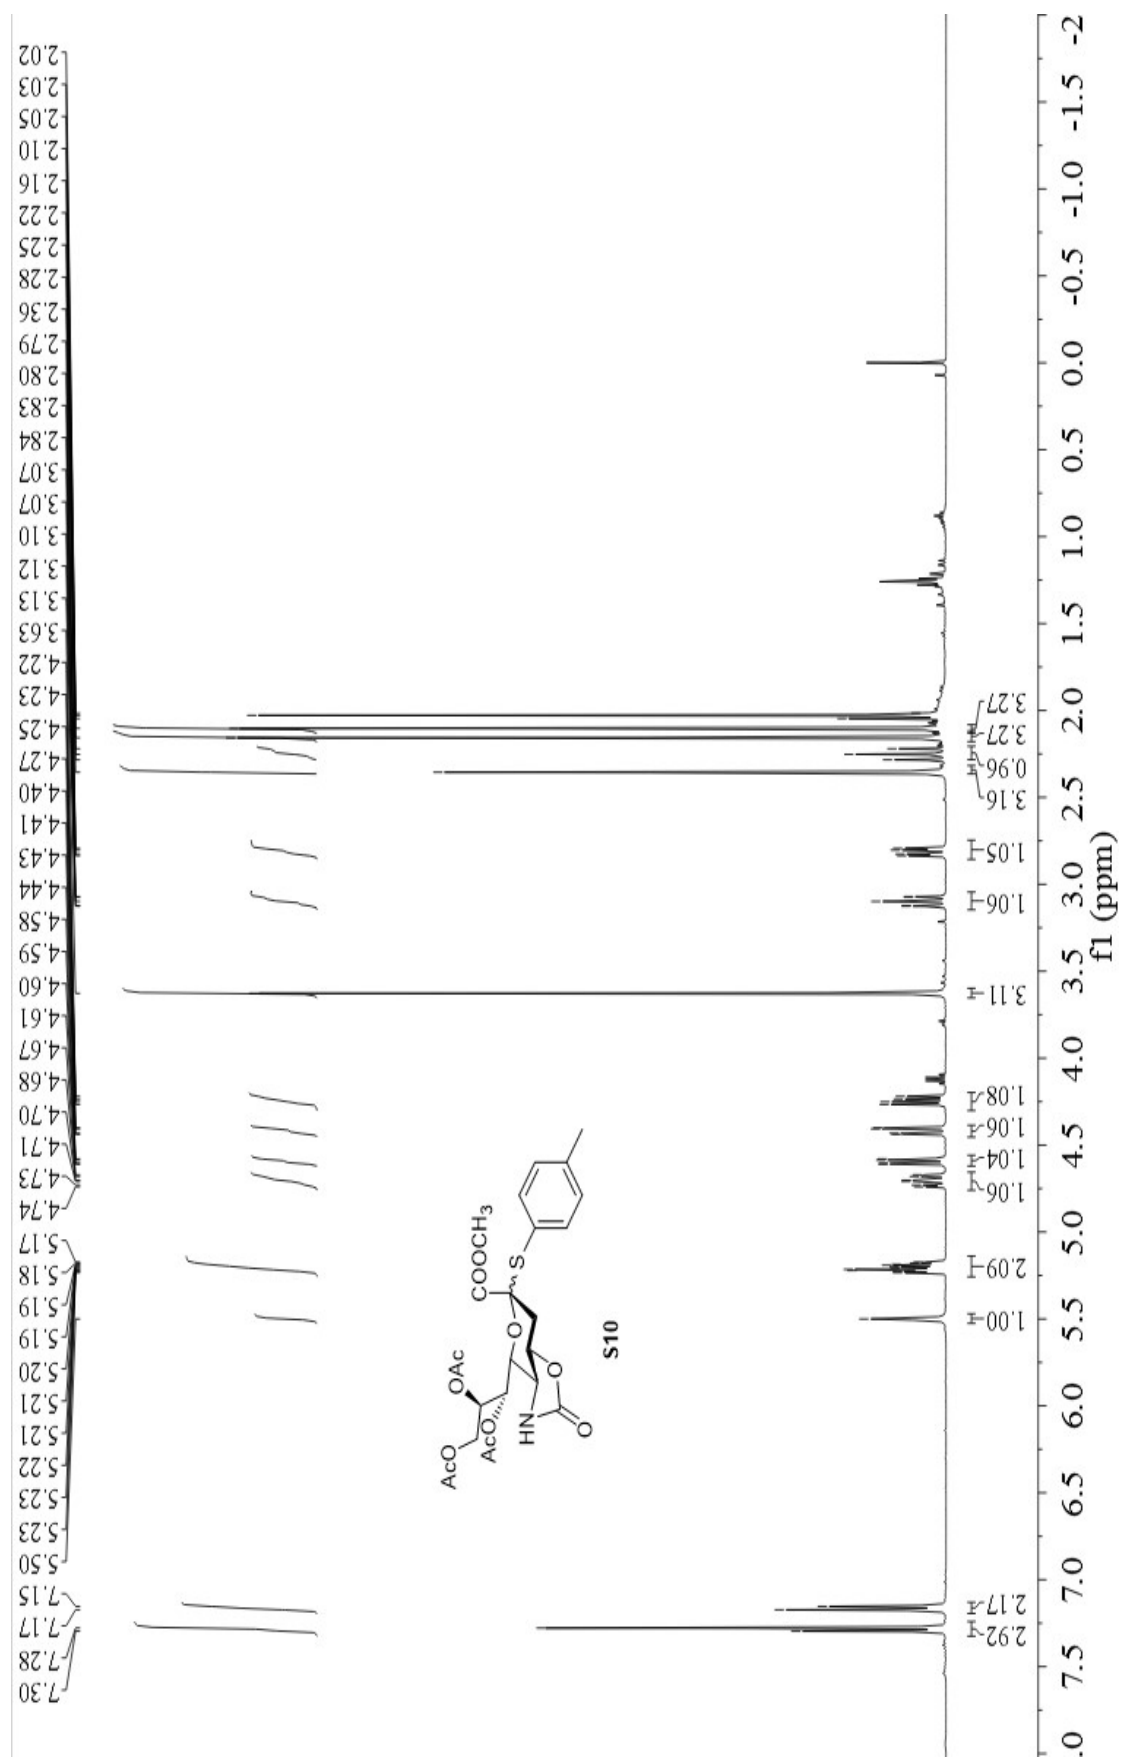

<sup>1</sup>H NMR Spectrum of compound S10 (CDCl<sub>3</sub>, 400 MHz)

—6.57

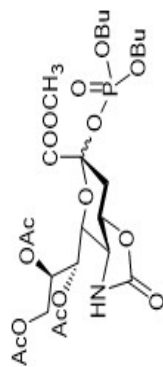

S11

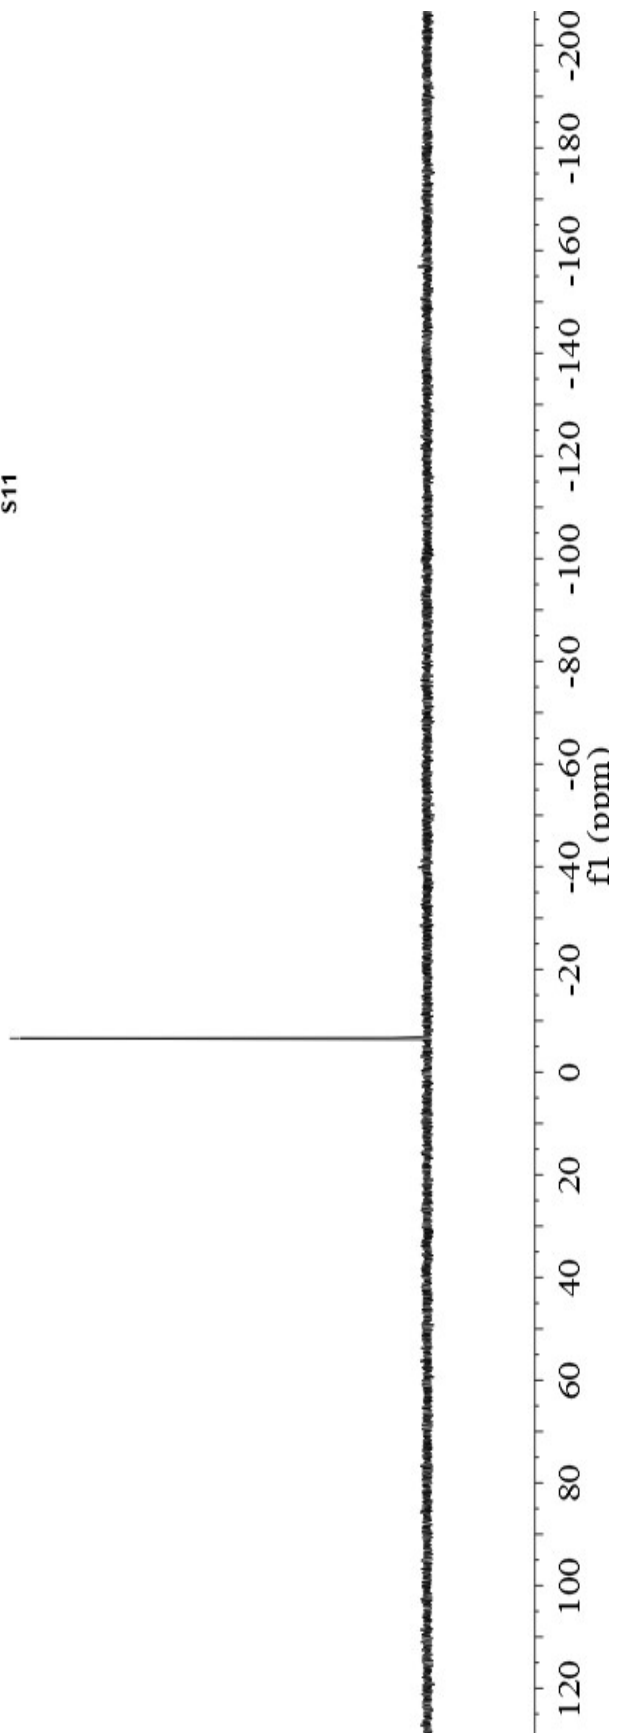

<sup>31</sup>P NMR Spectrum of compound S11 (CDCl<sub>3</sub>, 400 MHz)

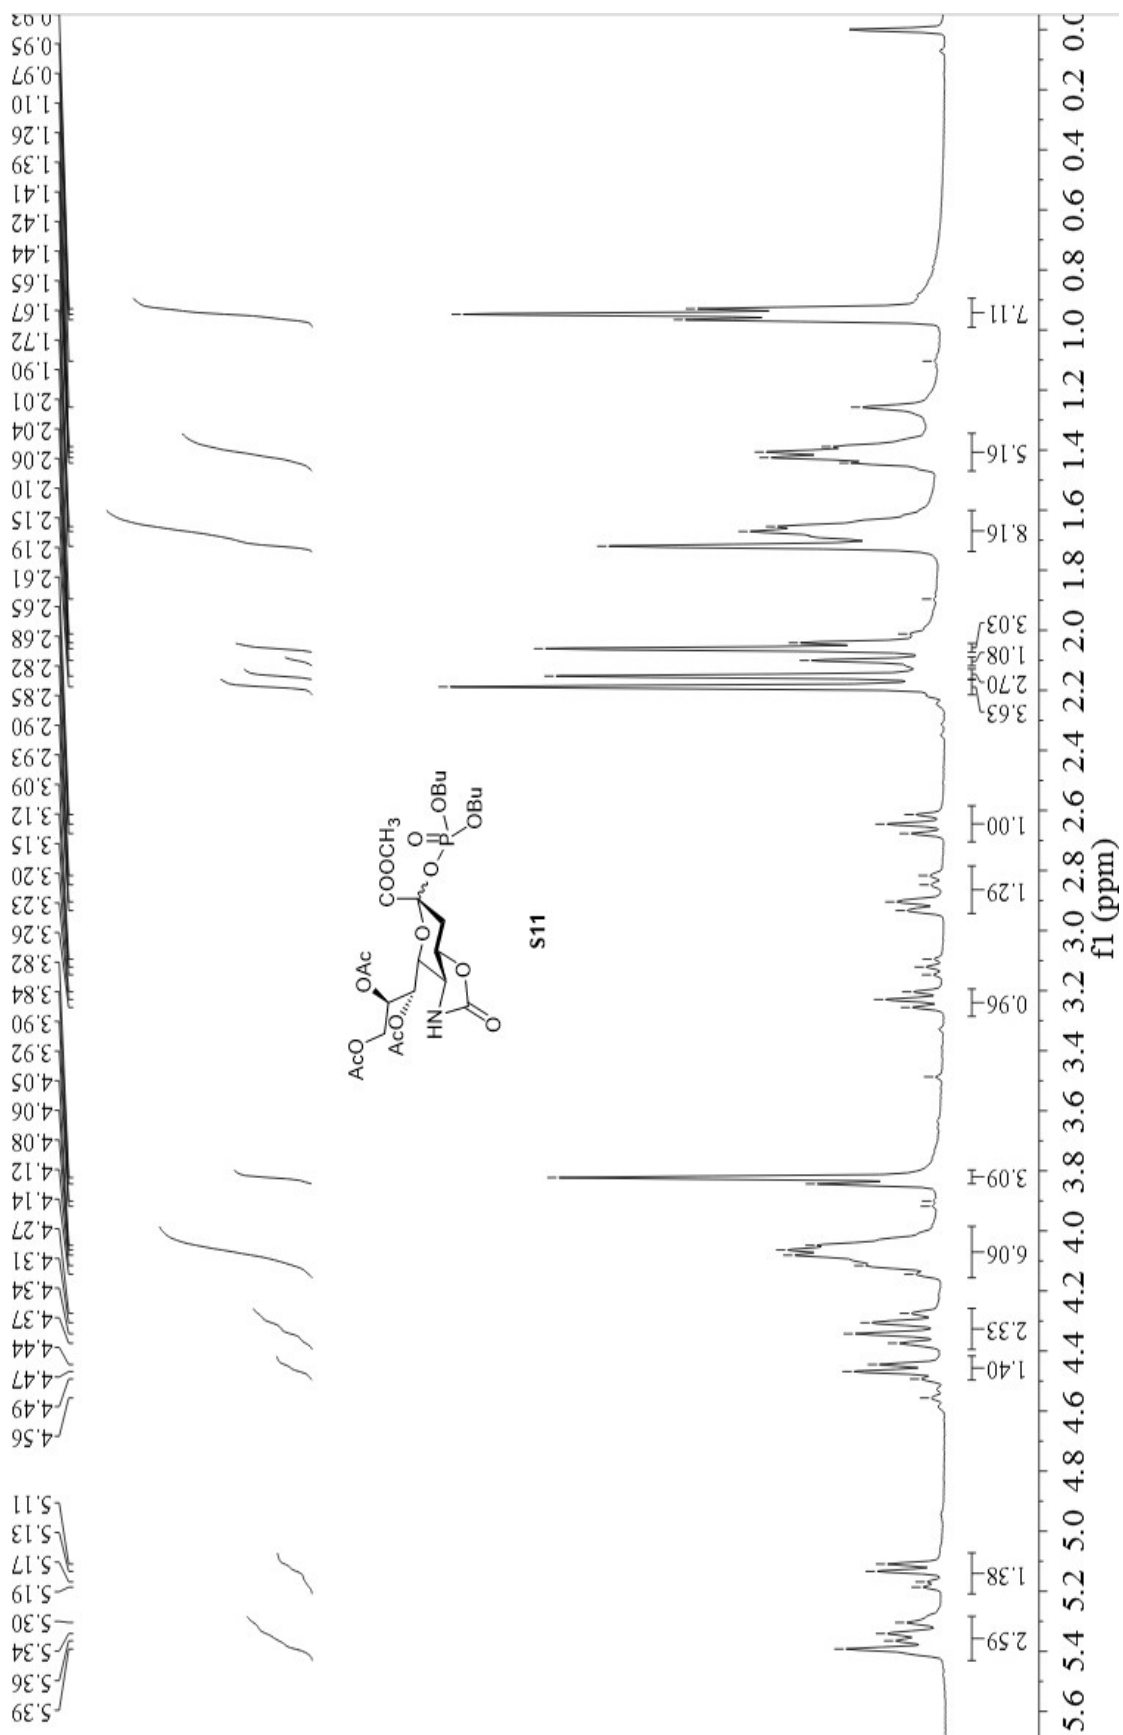

<sup>1</sup>H NMR Spectrum of compound S11 (CDCl<sub>3</sub>, 400 MHz)



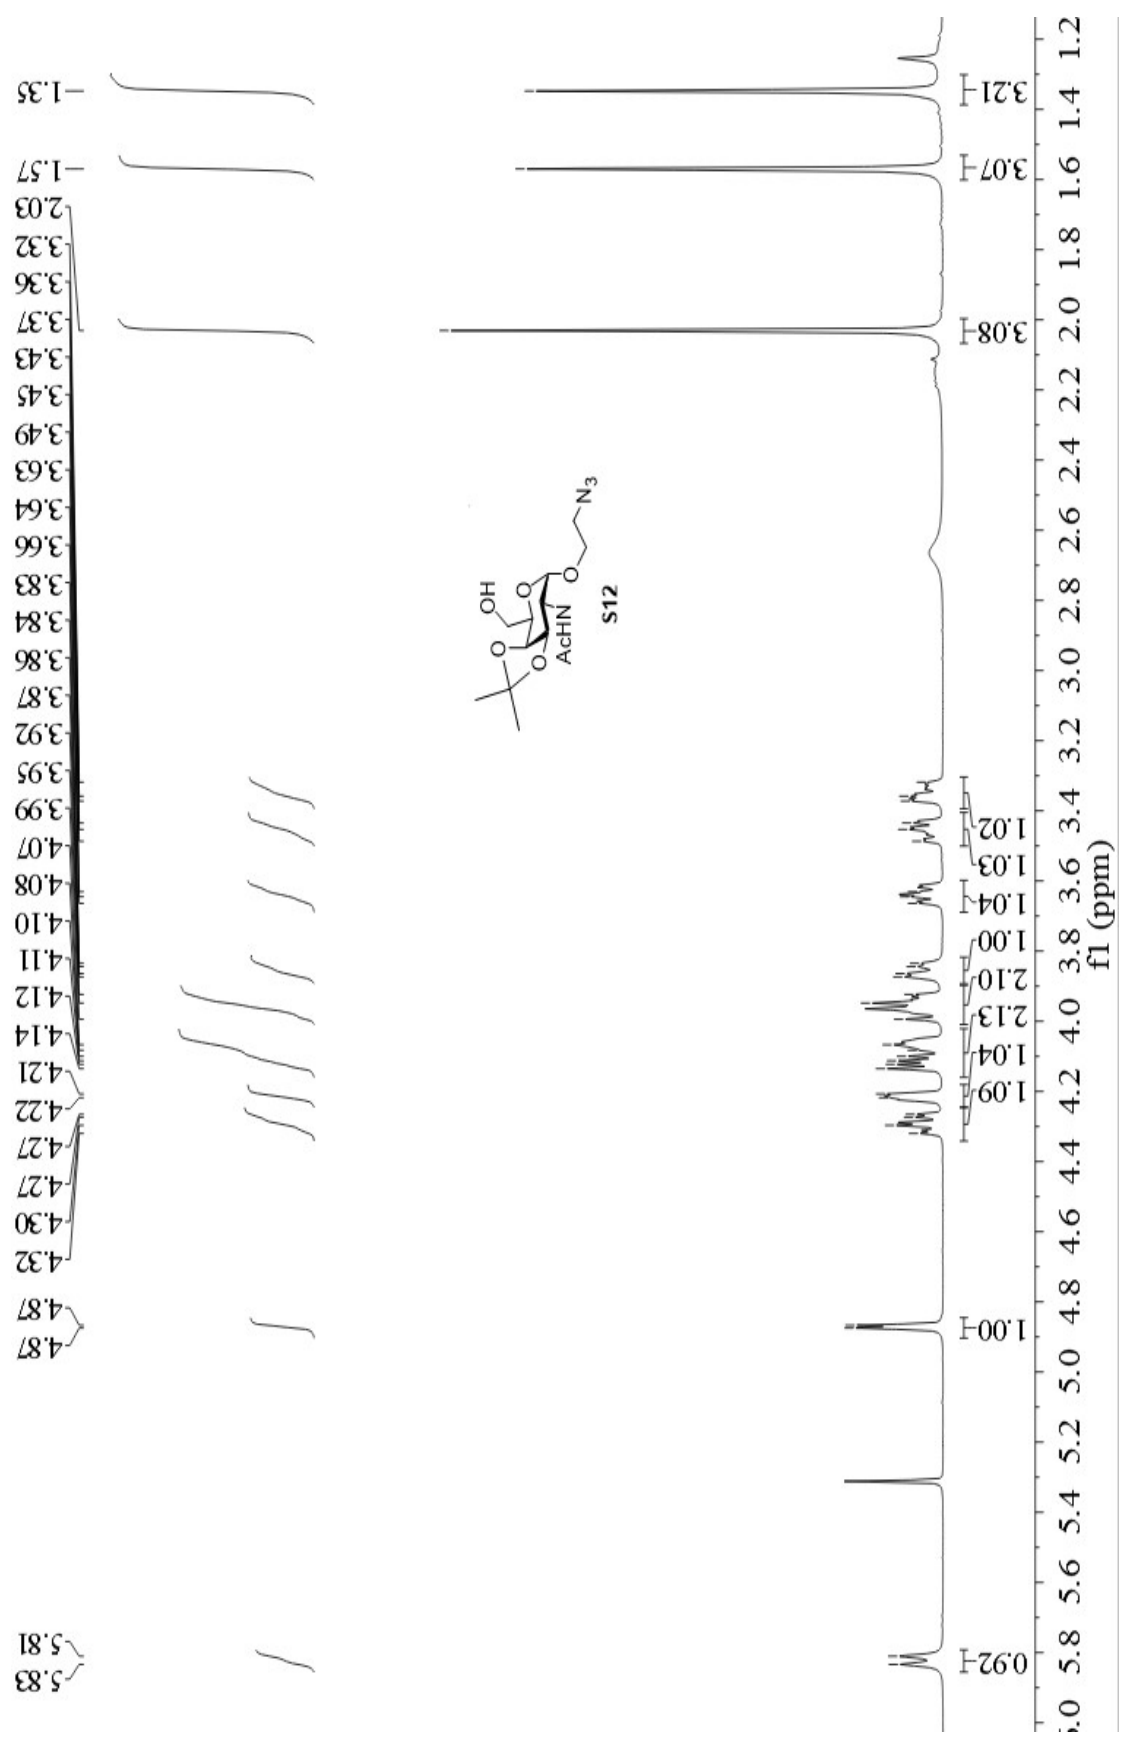

<sup>1</sup>H NMR Spectrum of compound S12 (CDCl<sub>3</sub>, 400 MHz)

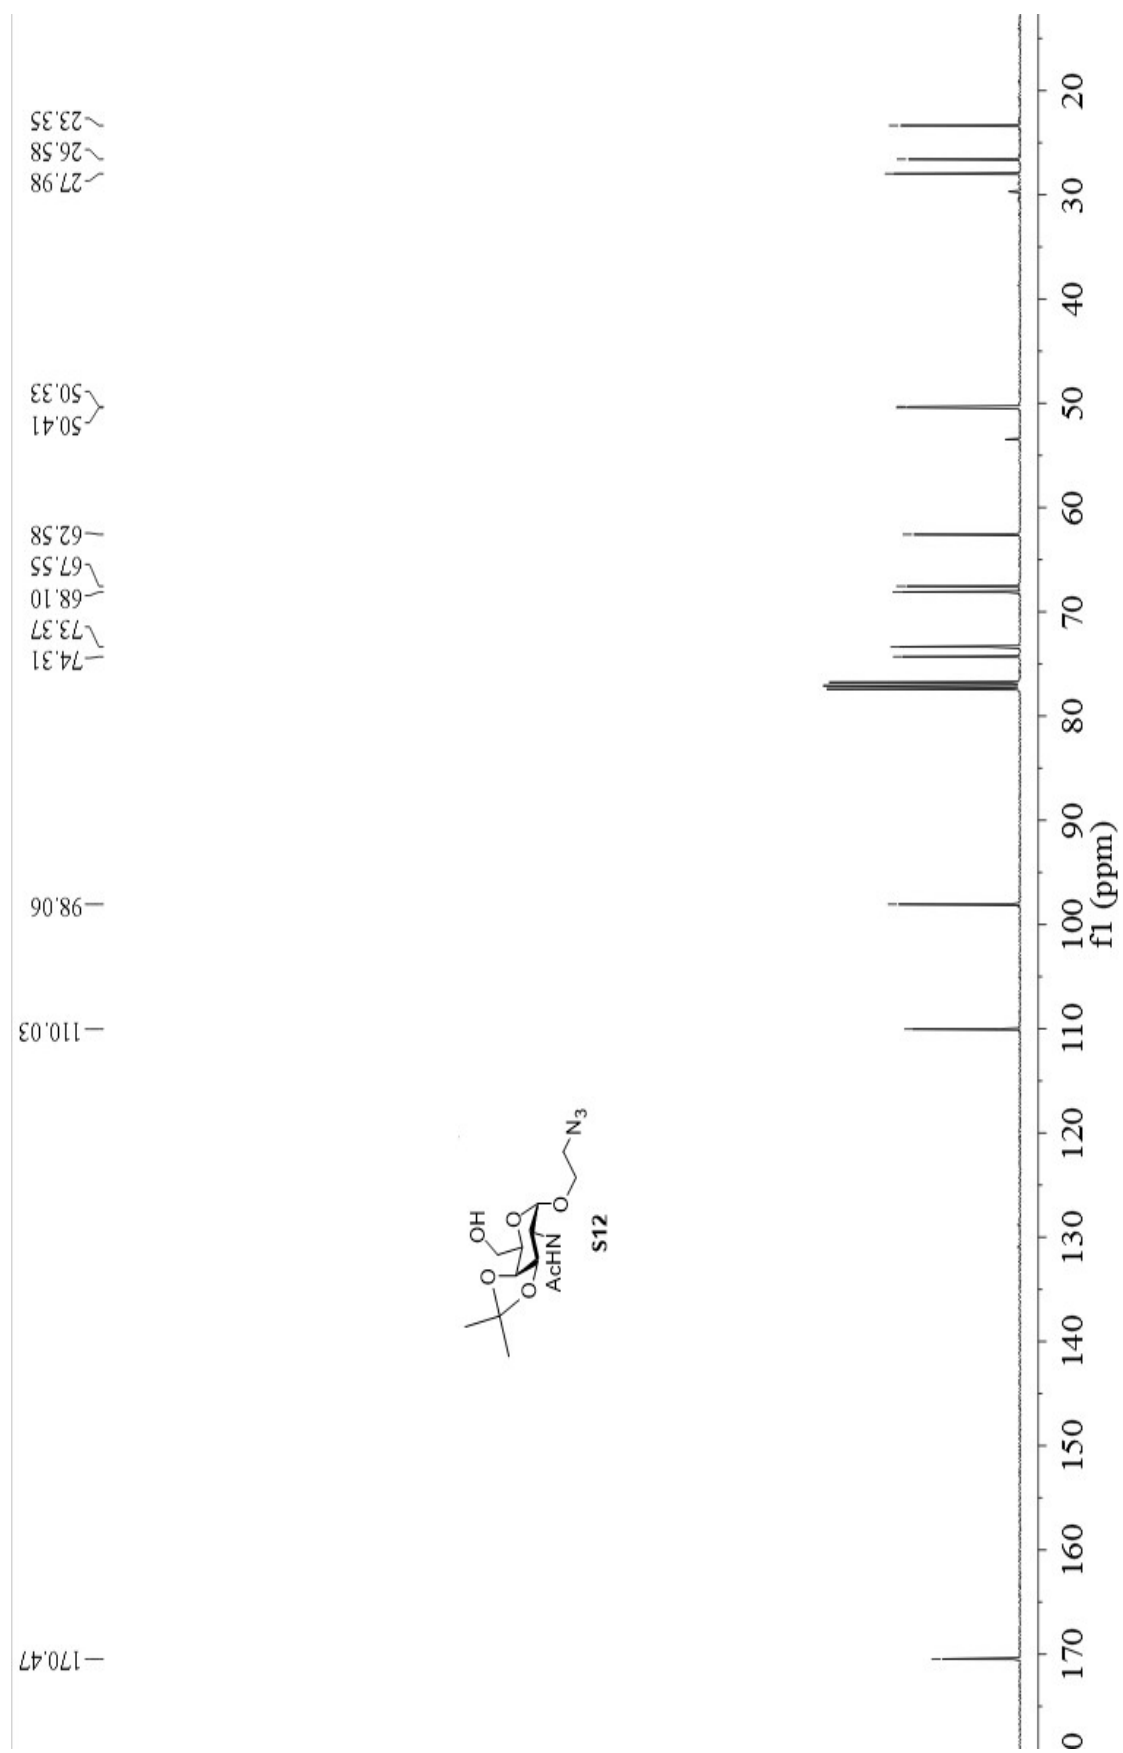

<sup>13</sup>C NMR Spectrum of compound **S12** (CDCl<sub>3</sub>, 400 MHz)

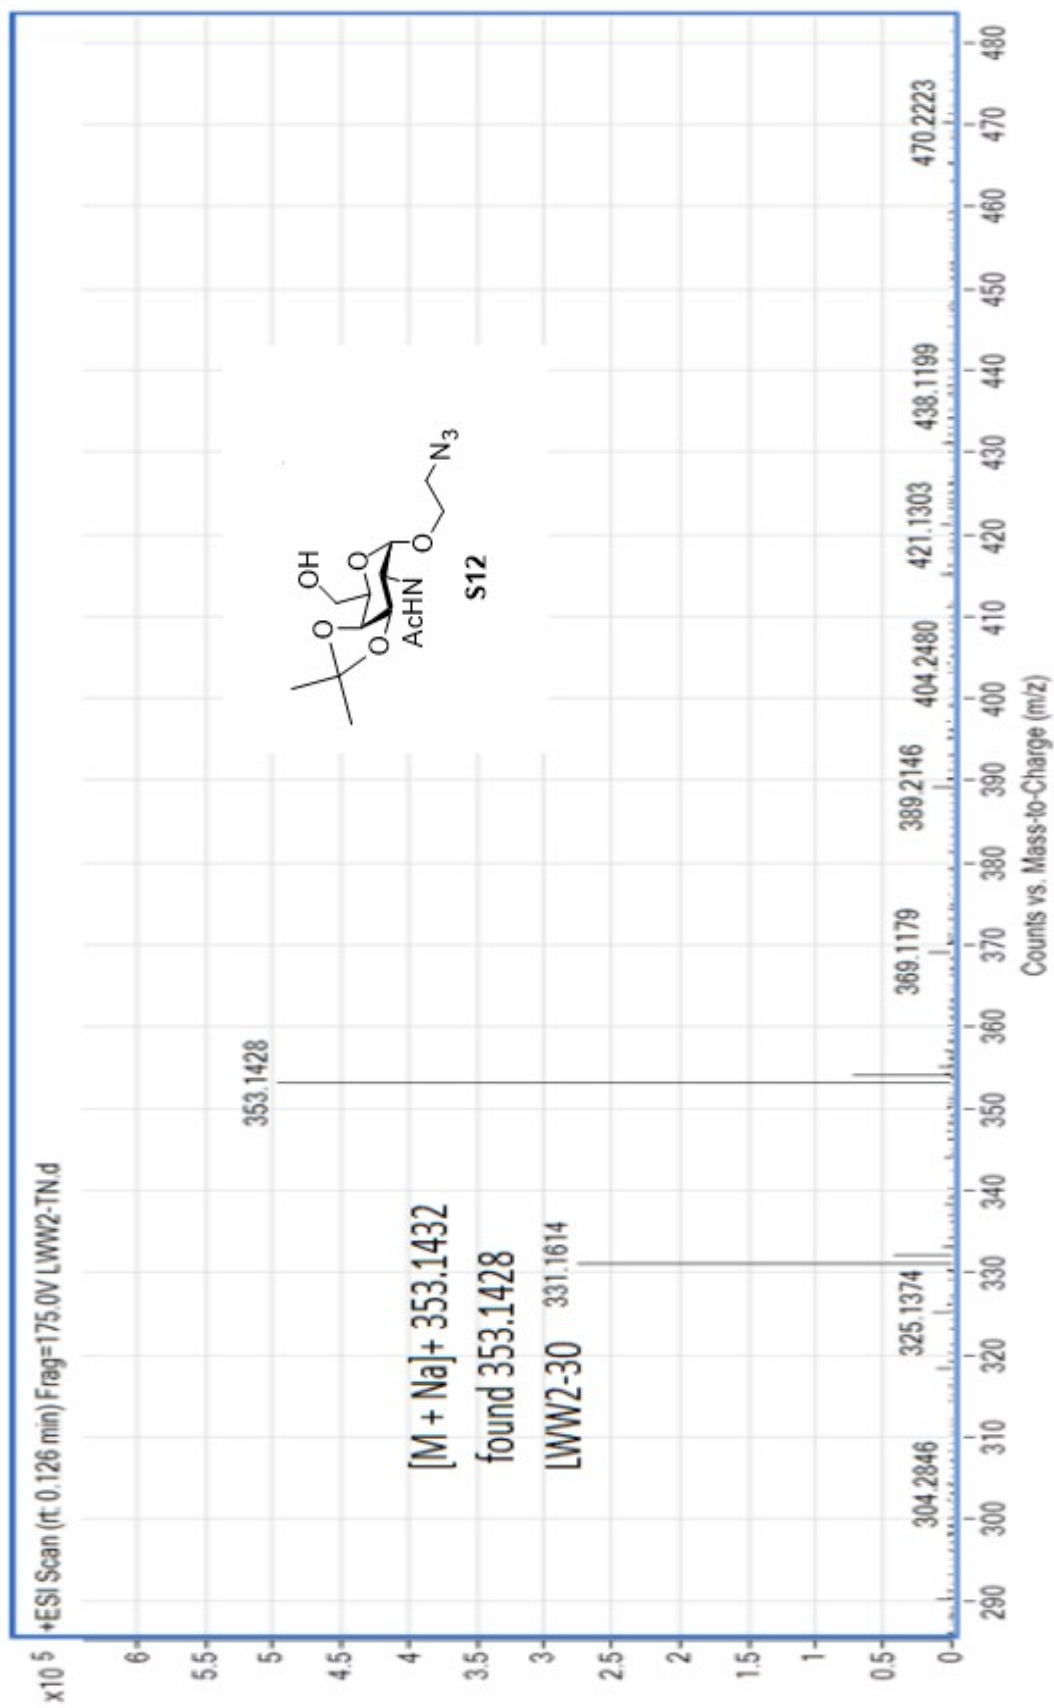

HR-ESI-MS spectrum of conjugate S12

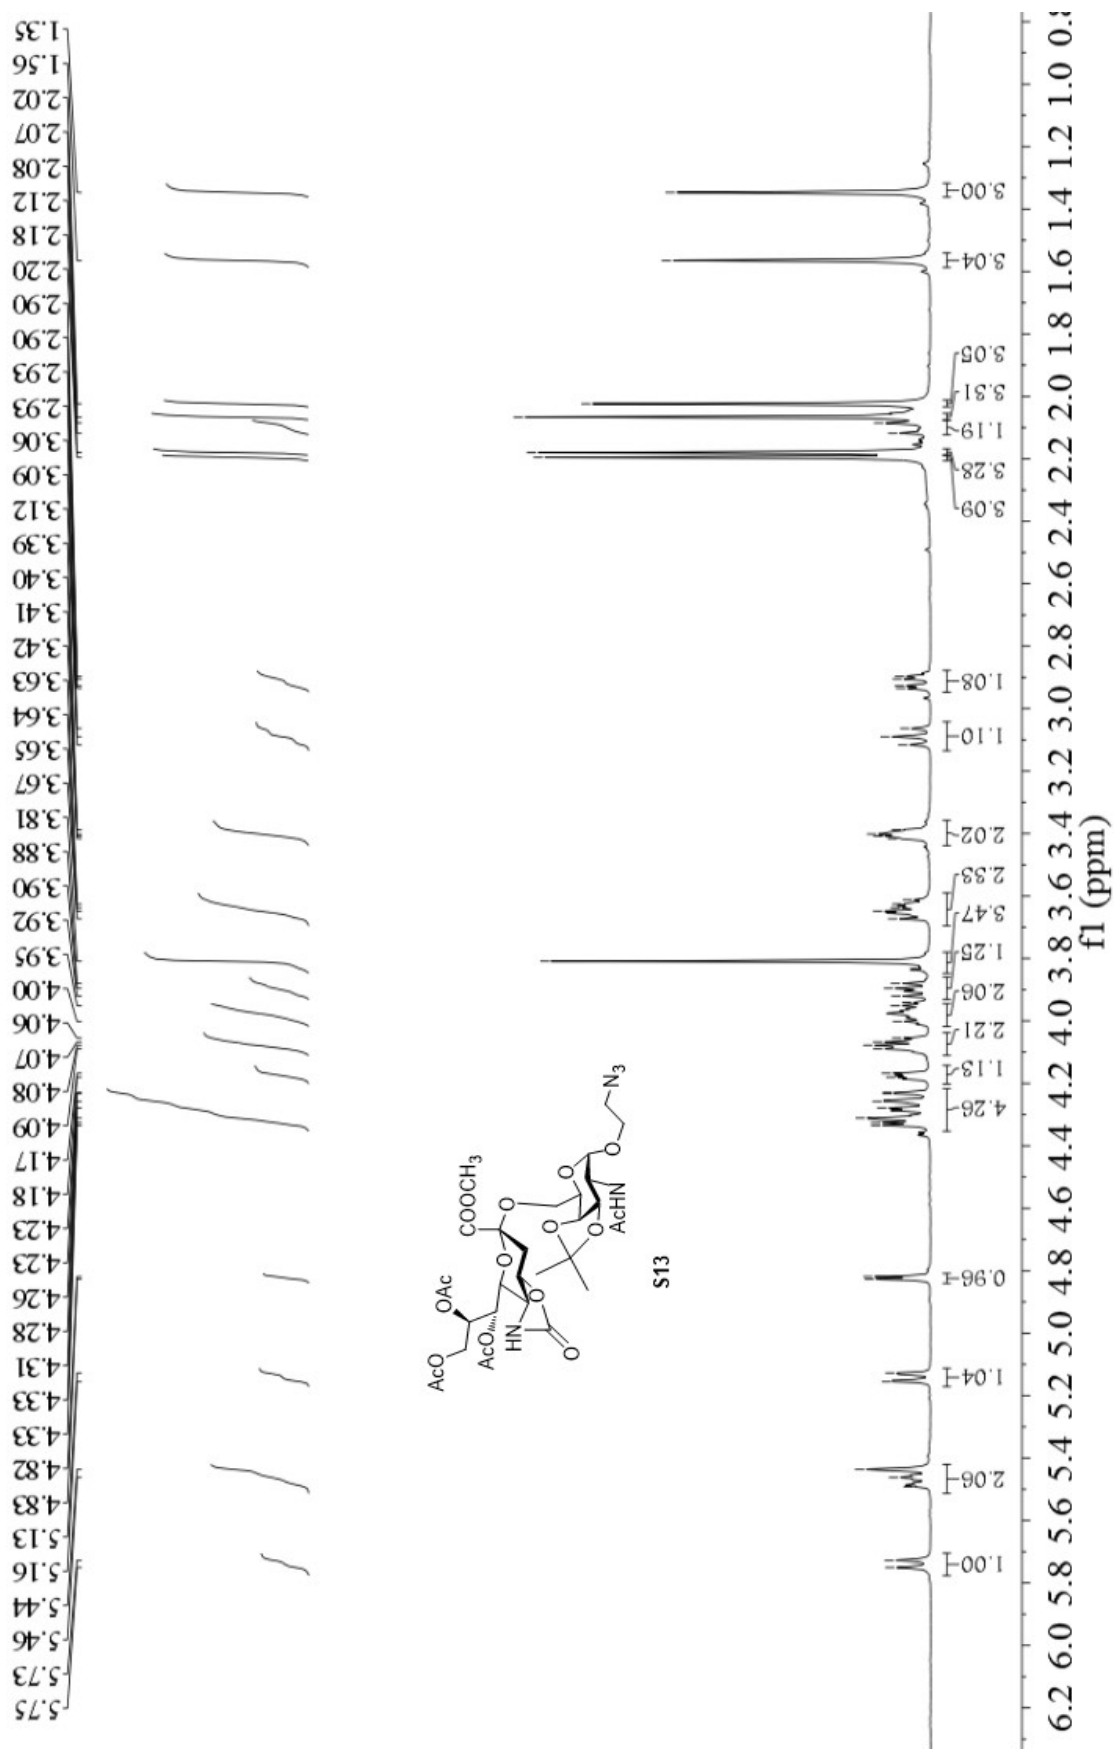

<sup>1</sup>H NMR Spectrum of compound S13 (CDCl<sub>3</sub>, 400 MHz)

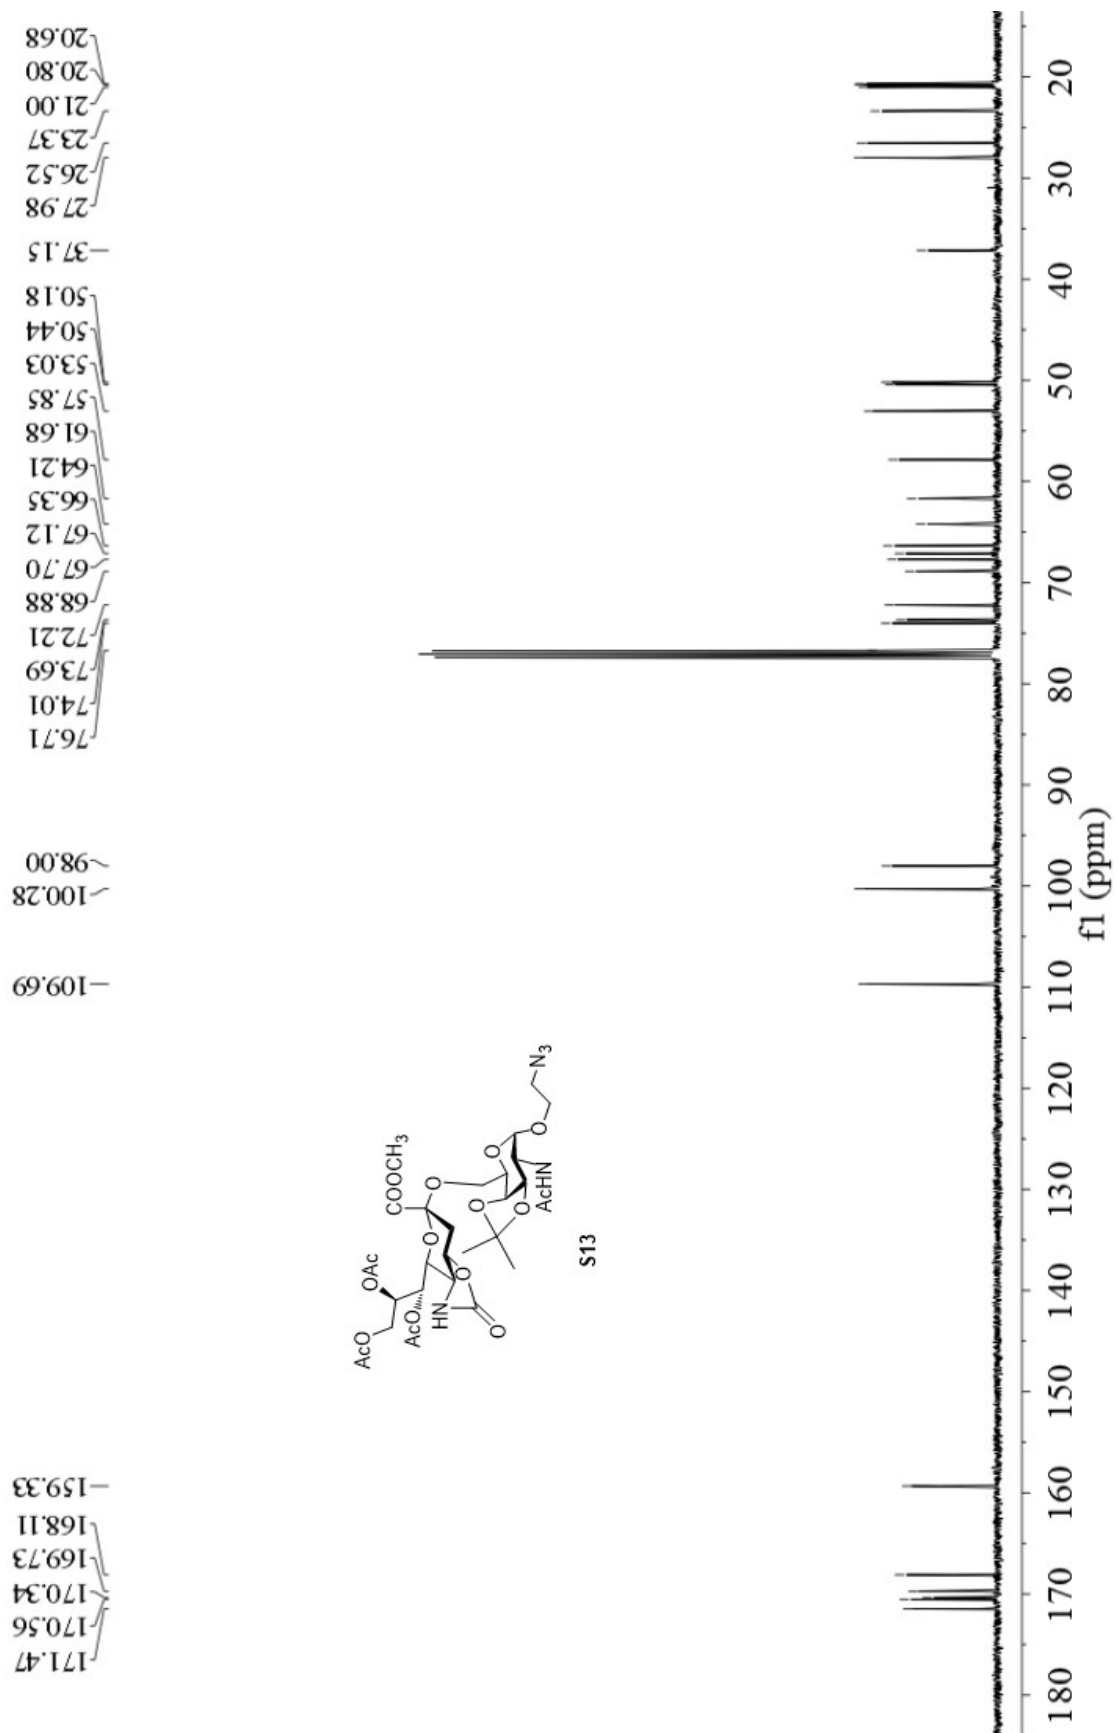

<sup>13</sup>C NMR Spectrum of compound **S13** (CDCl<sub>3</sub>, 400 MHz)

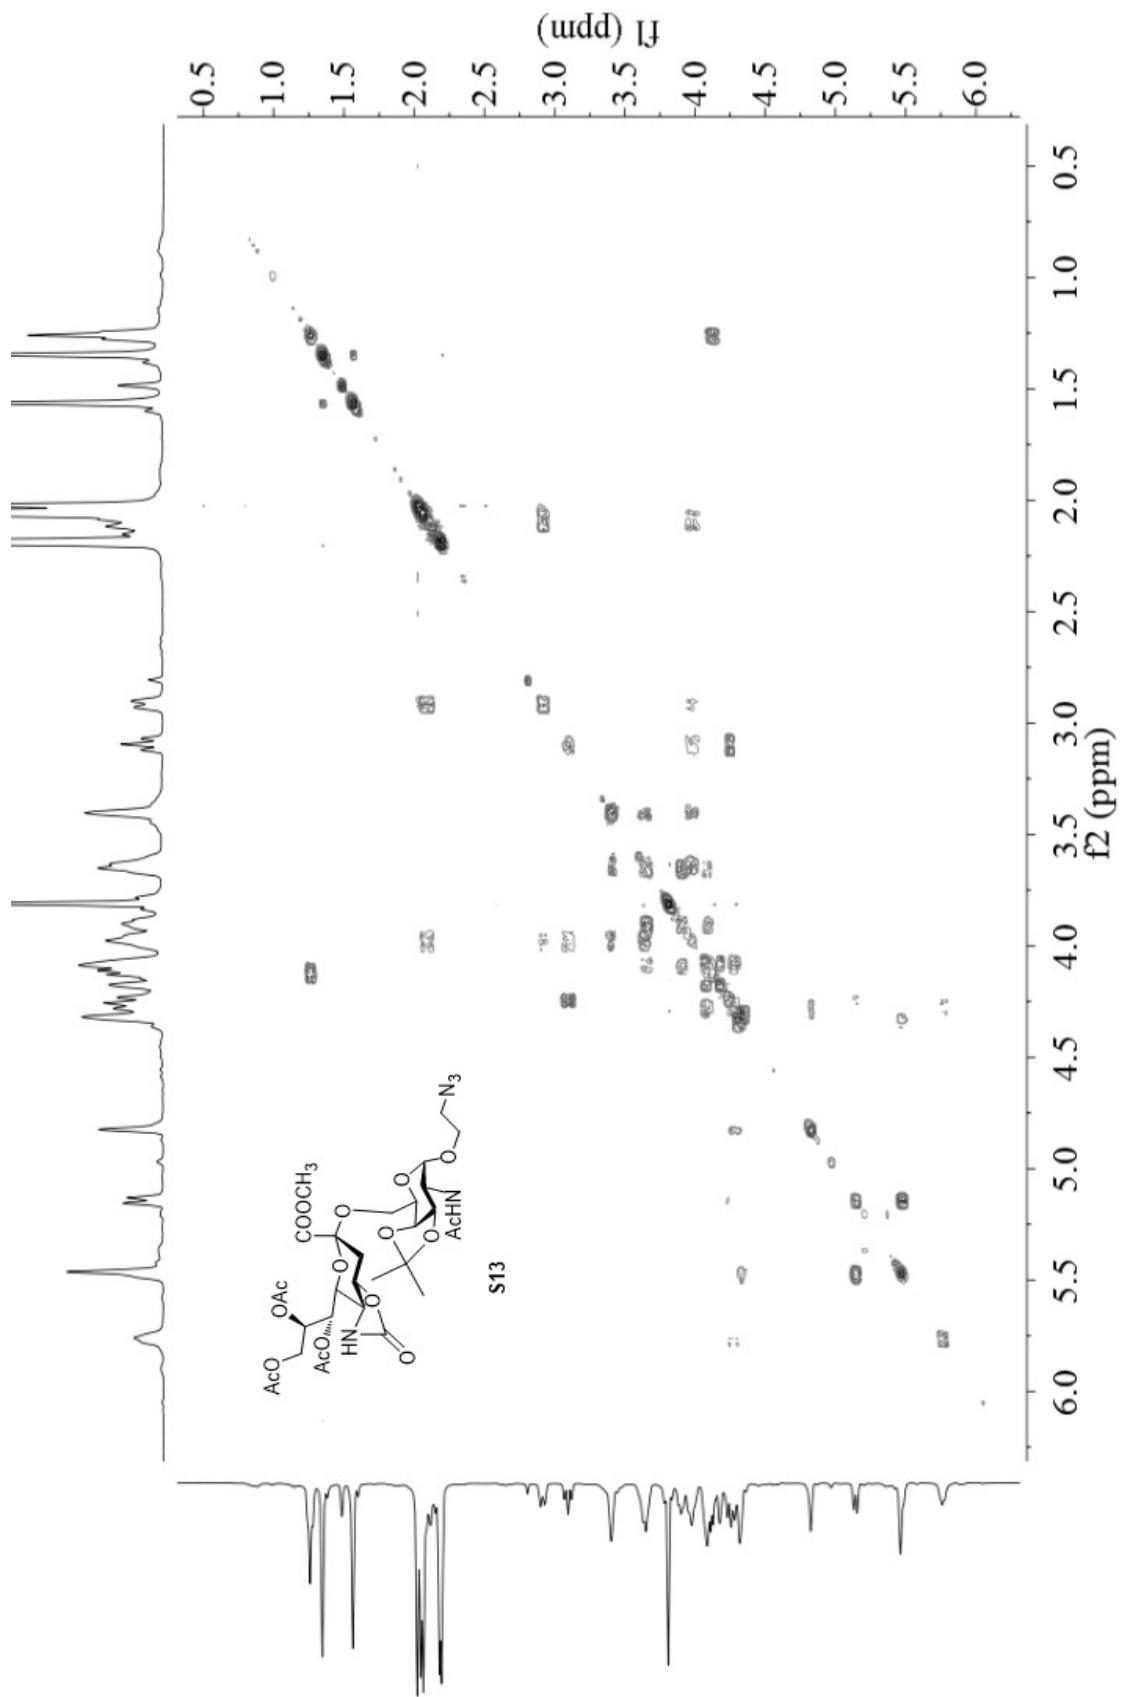

$^1\text{H}$ - $^1\text{H}$  COSY NMR Spectrum of compound **S13** ( $\text{CDCl}_3$ , 400 MHz)

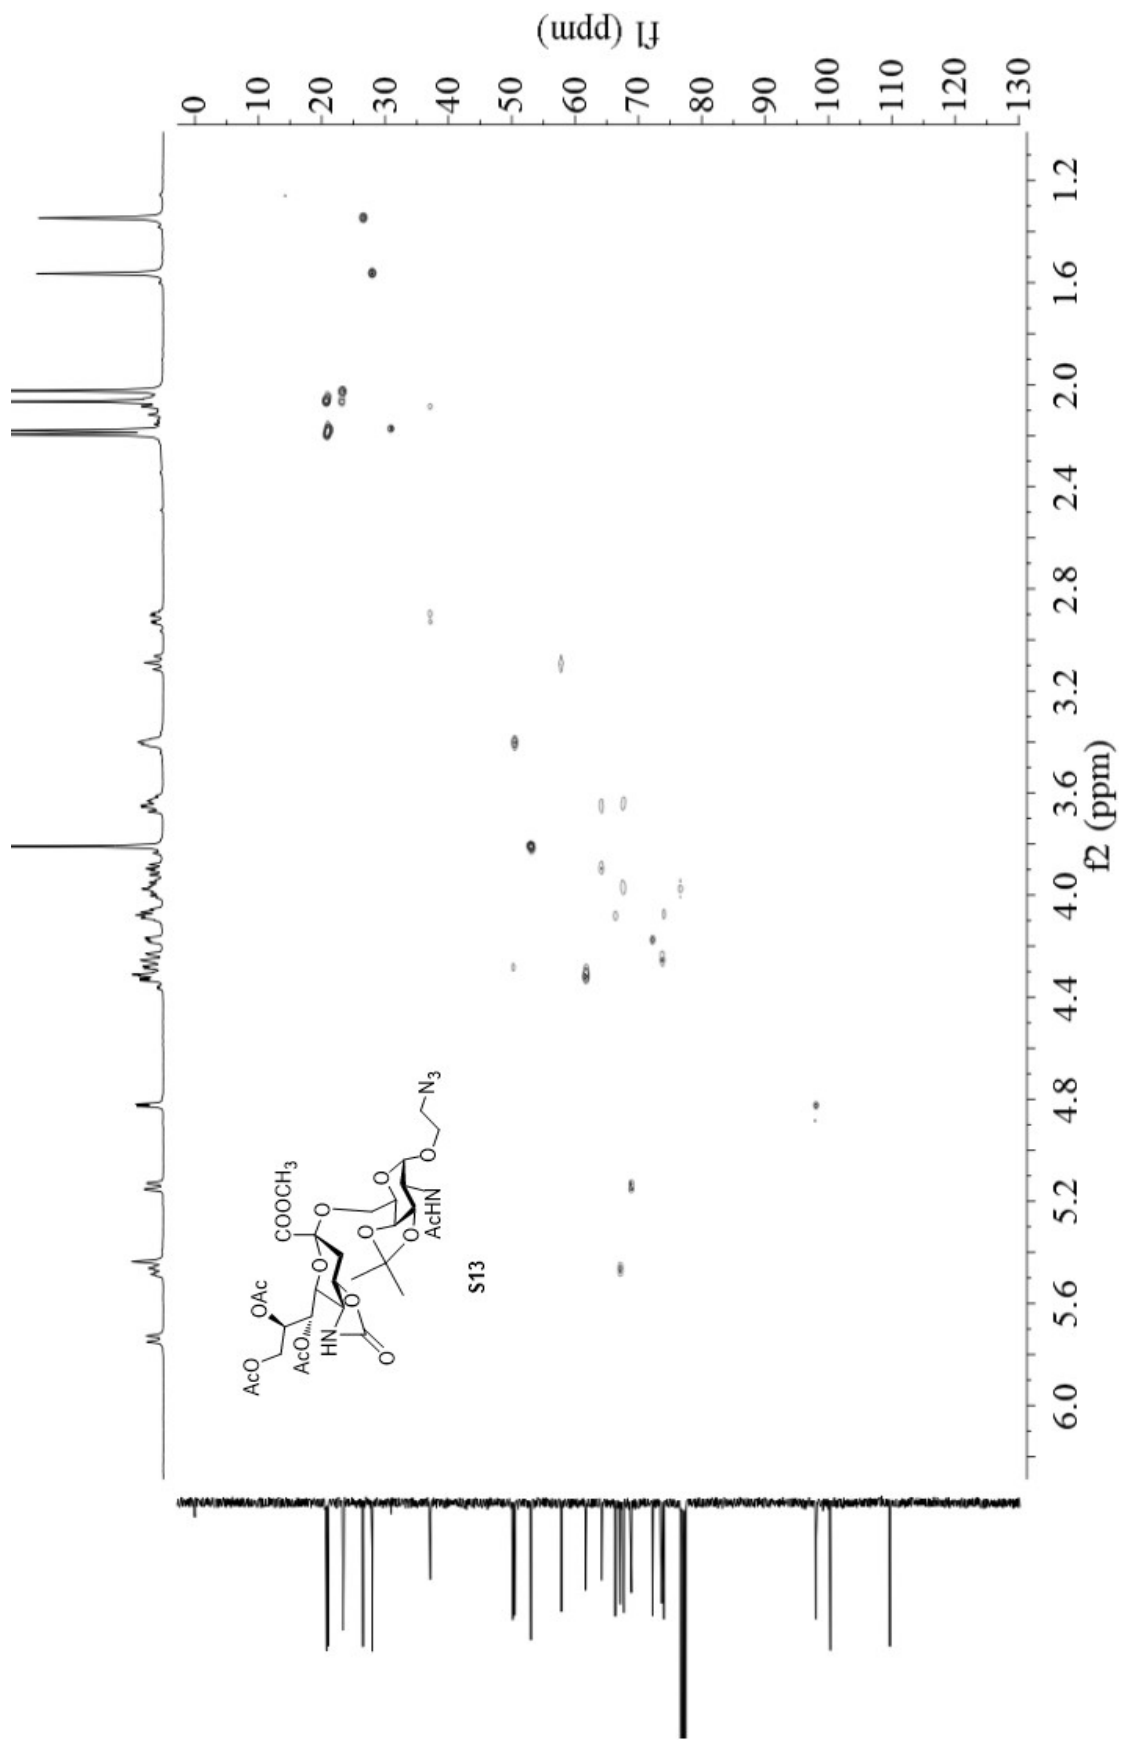

HSQC NMR Spectrum of compound S13 (CDCl<sub>3</sub>, 400 MHz)

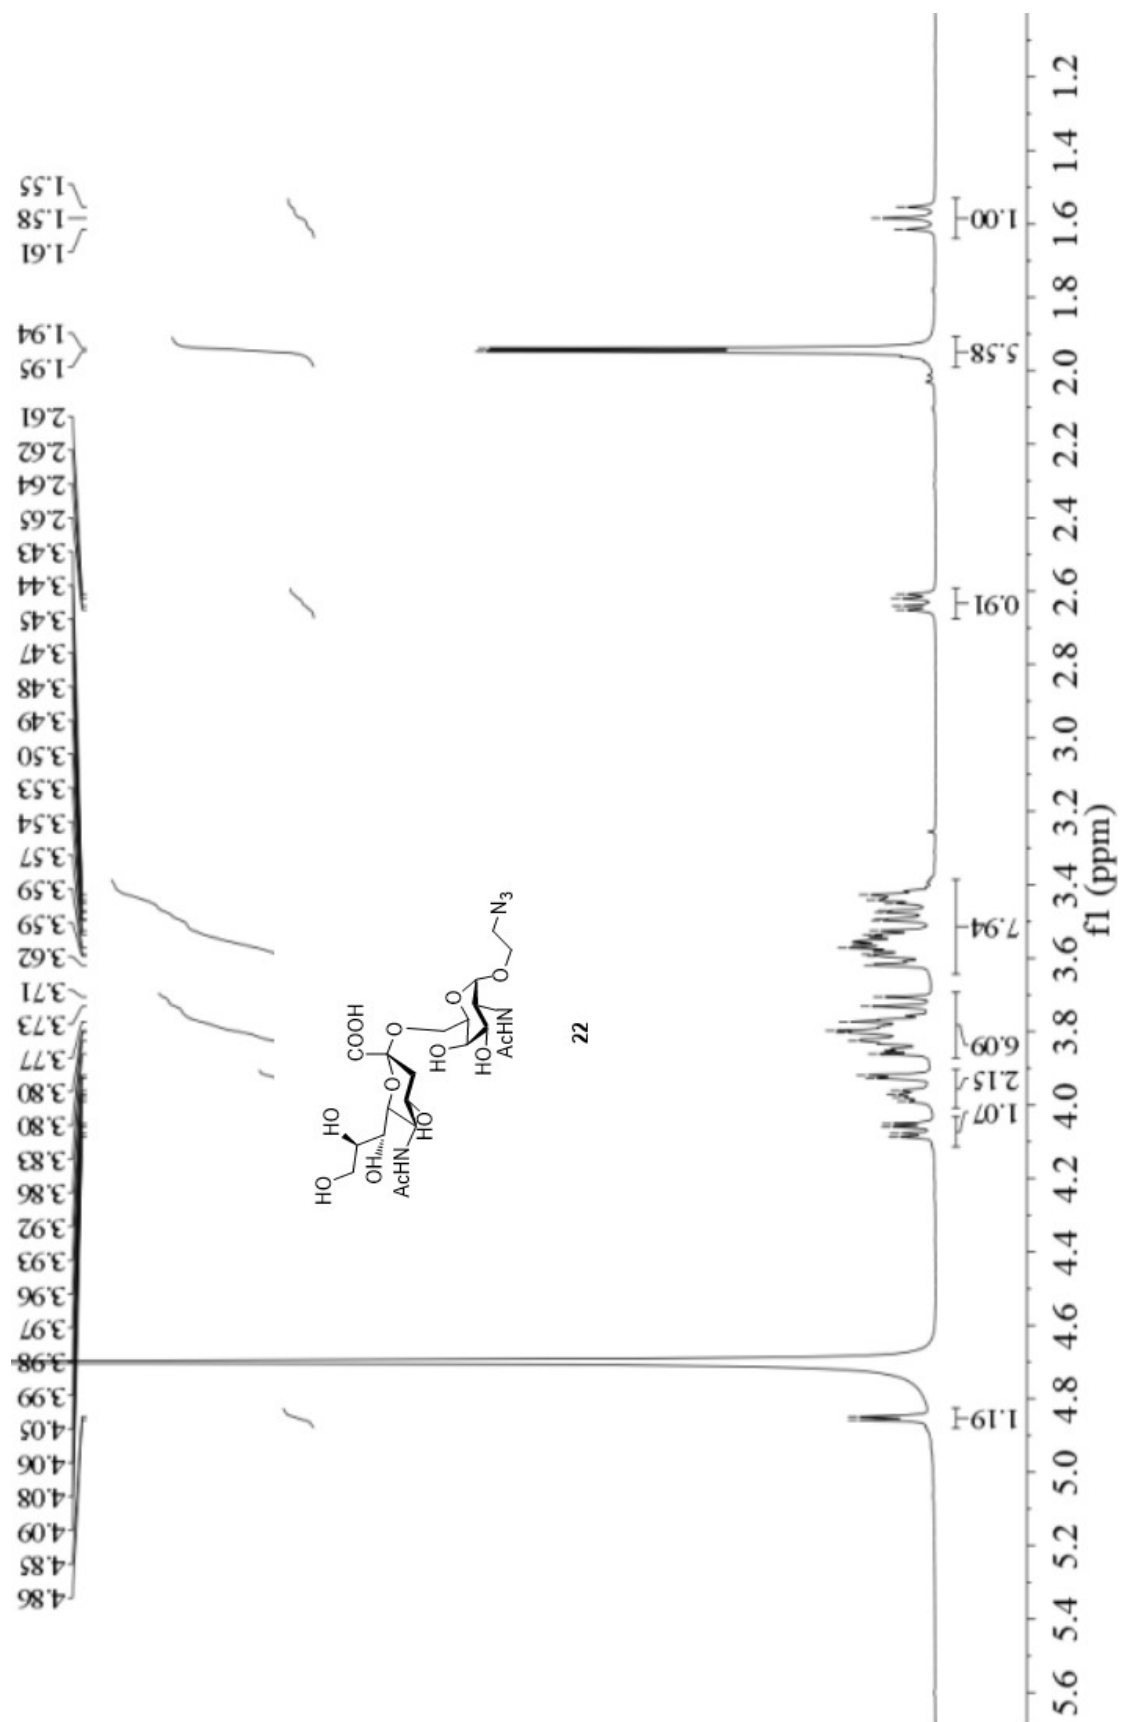

<sup>1</sup>H NMR Spectrum of compound **22** (D<sub>2</sub>O, 400 MHz)



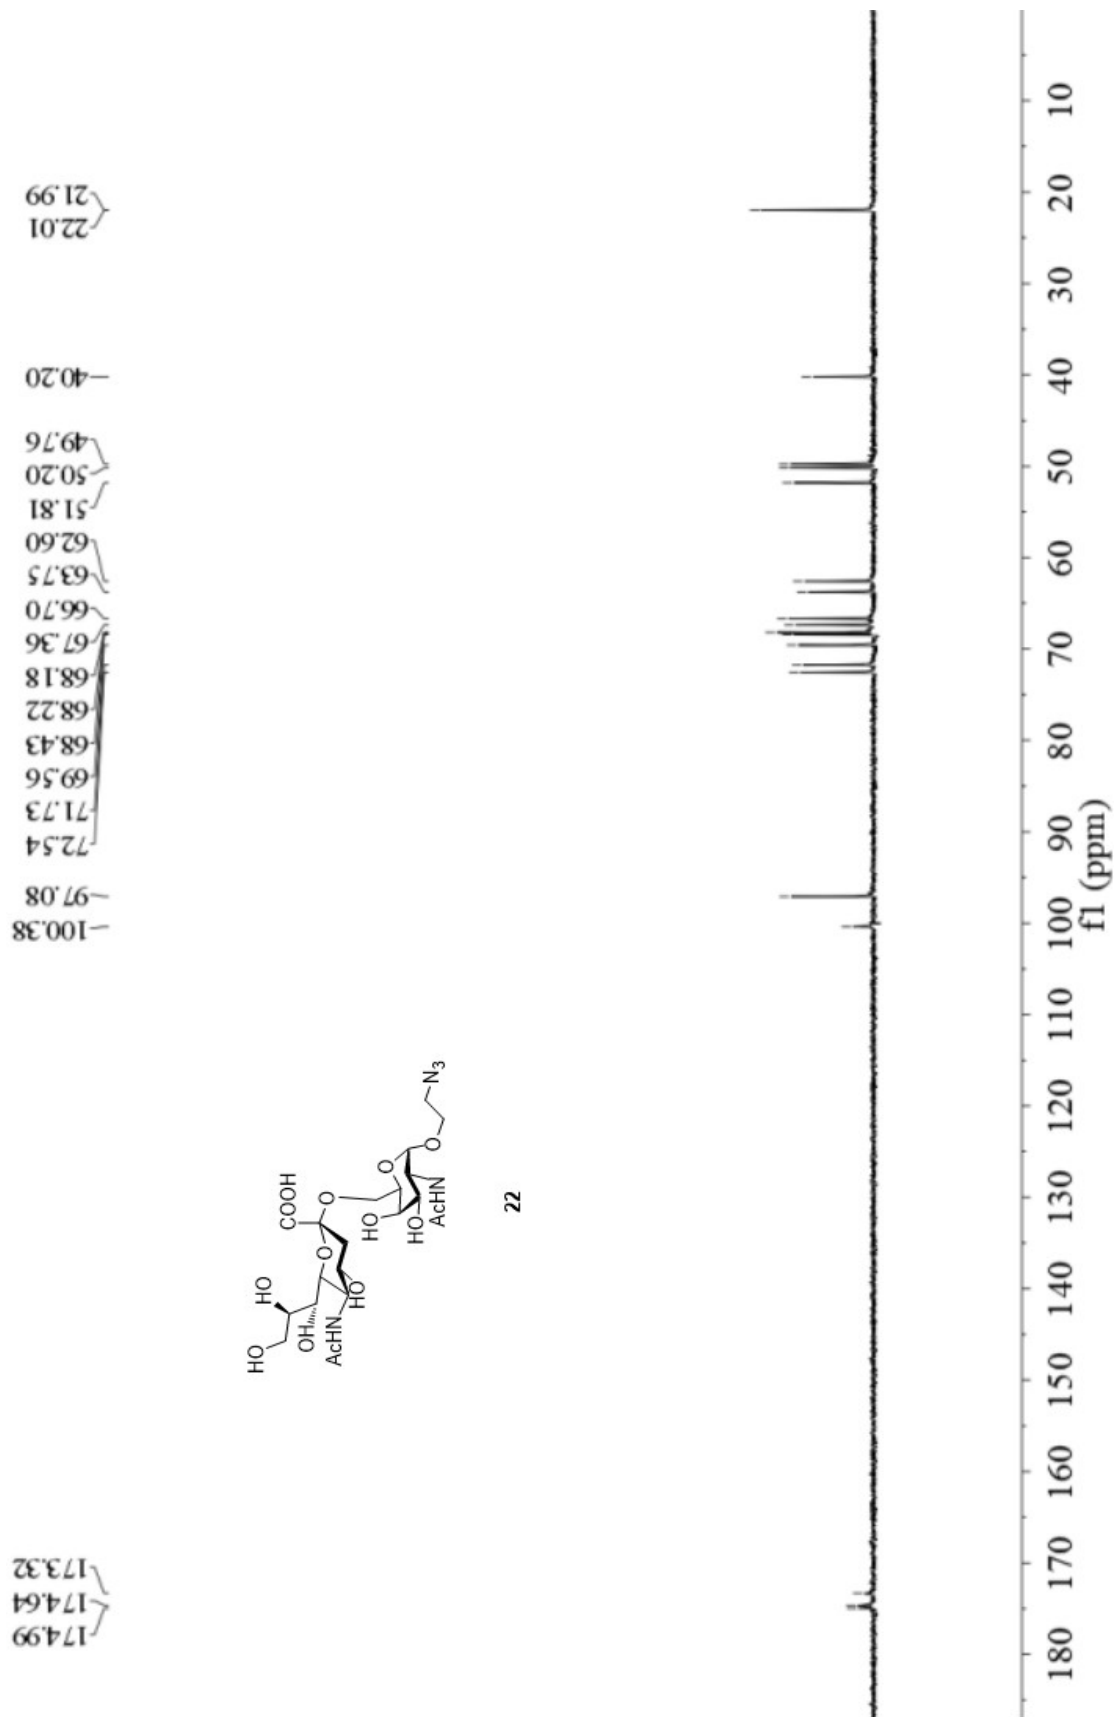

<sup>13</sup>C NMR Spectrum of compound **22** (D<sub>2</sub>O, 400 MHz)

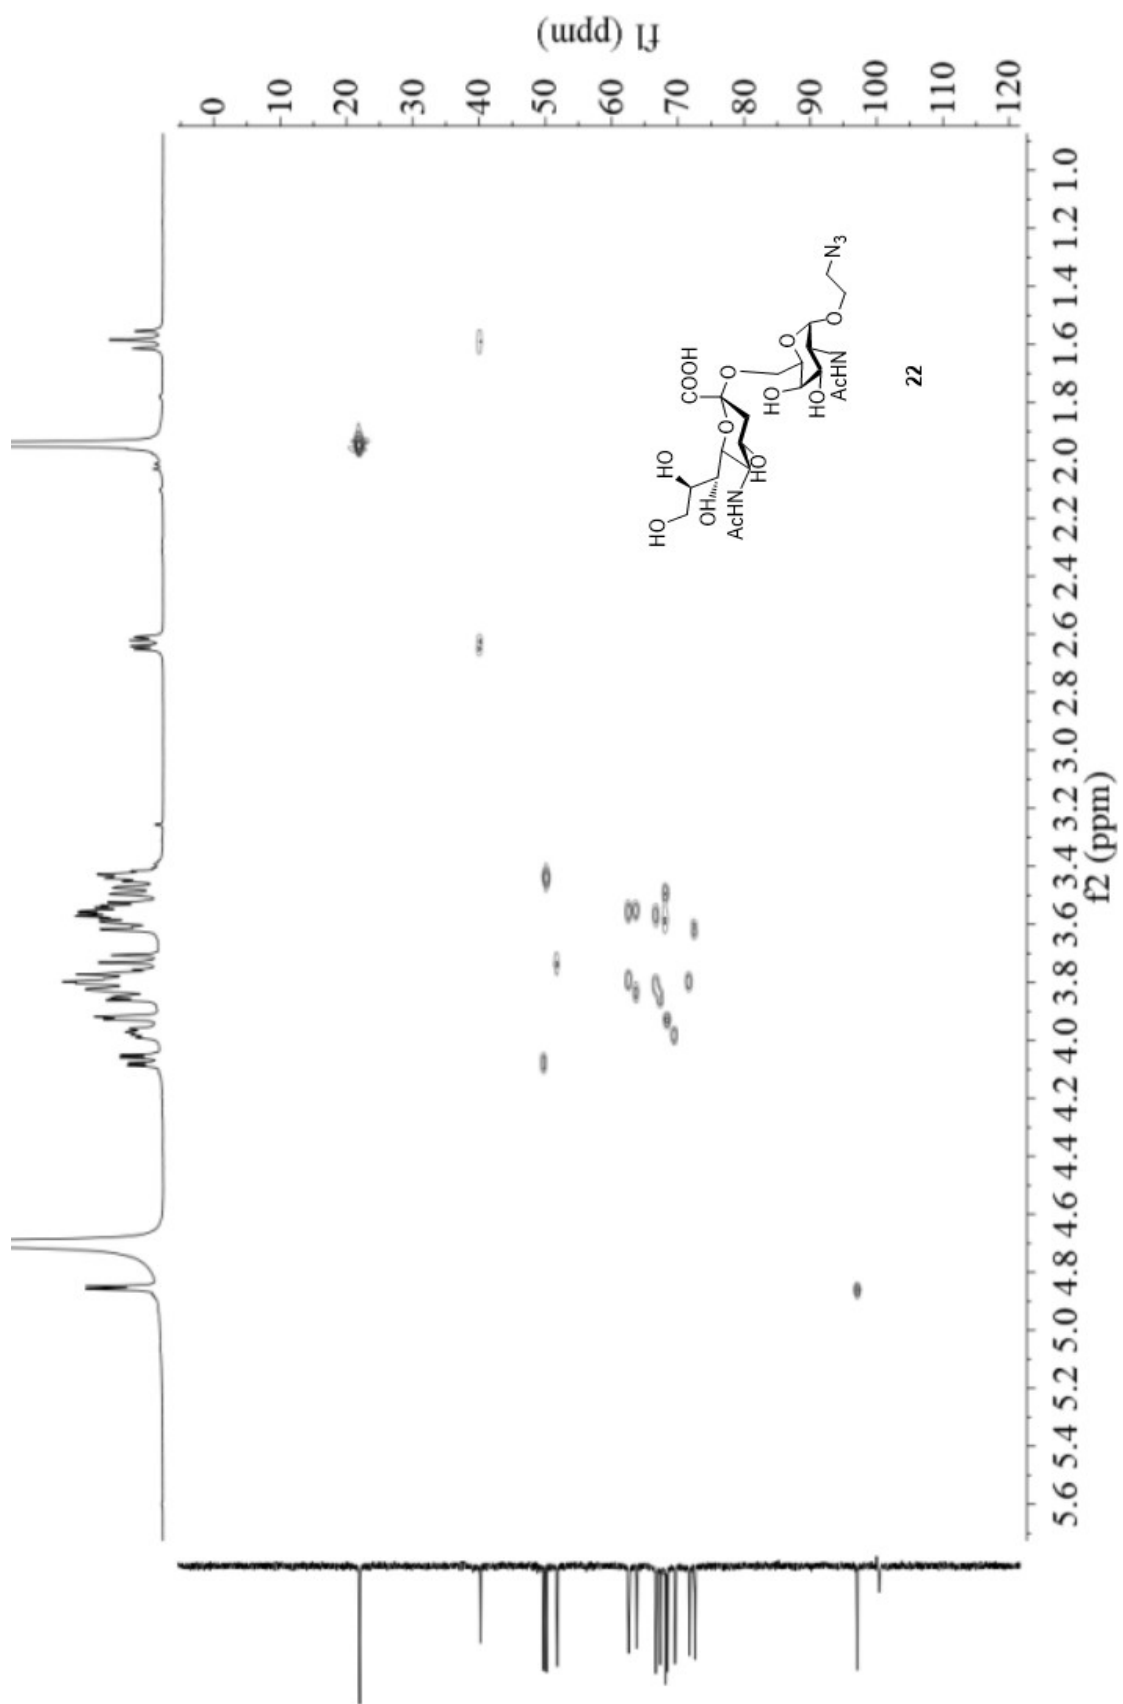

HSQC Spectrum of compound **22** (D<sub>2</sub>O, 400 MHz)

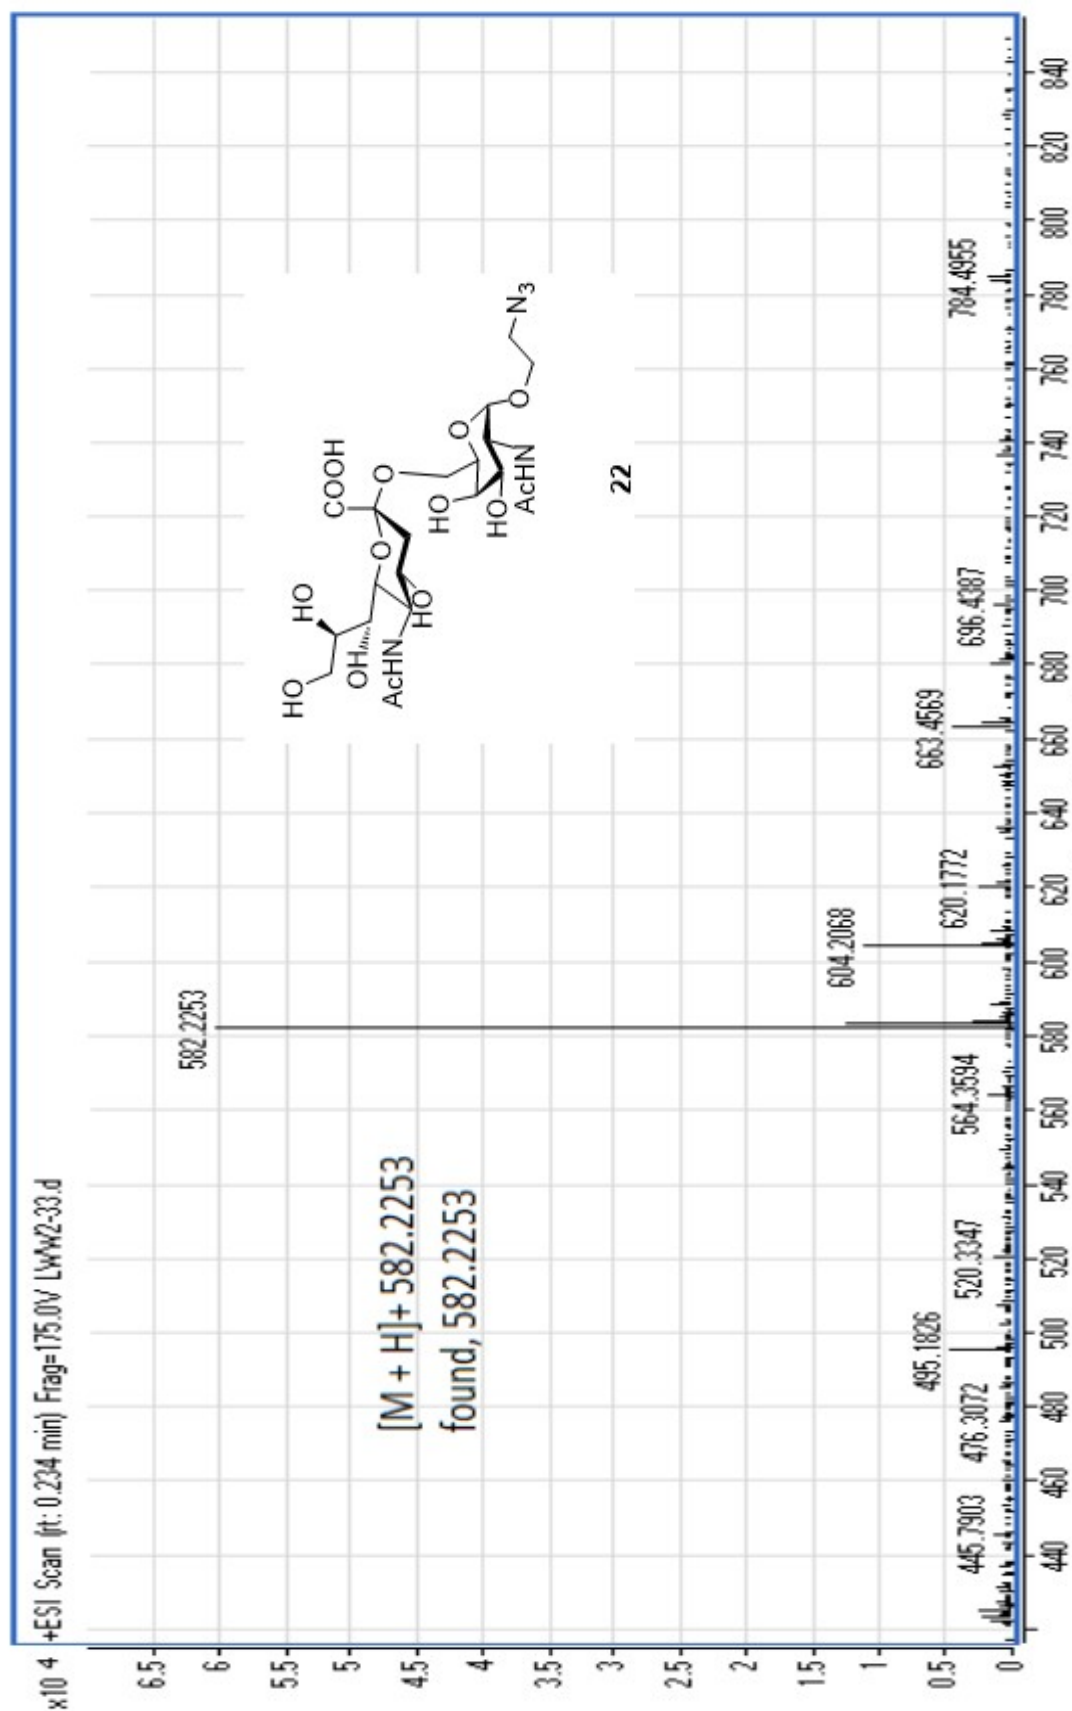

HR-ESI-MS spectrum of conjugate 22

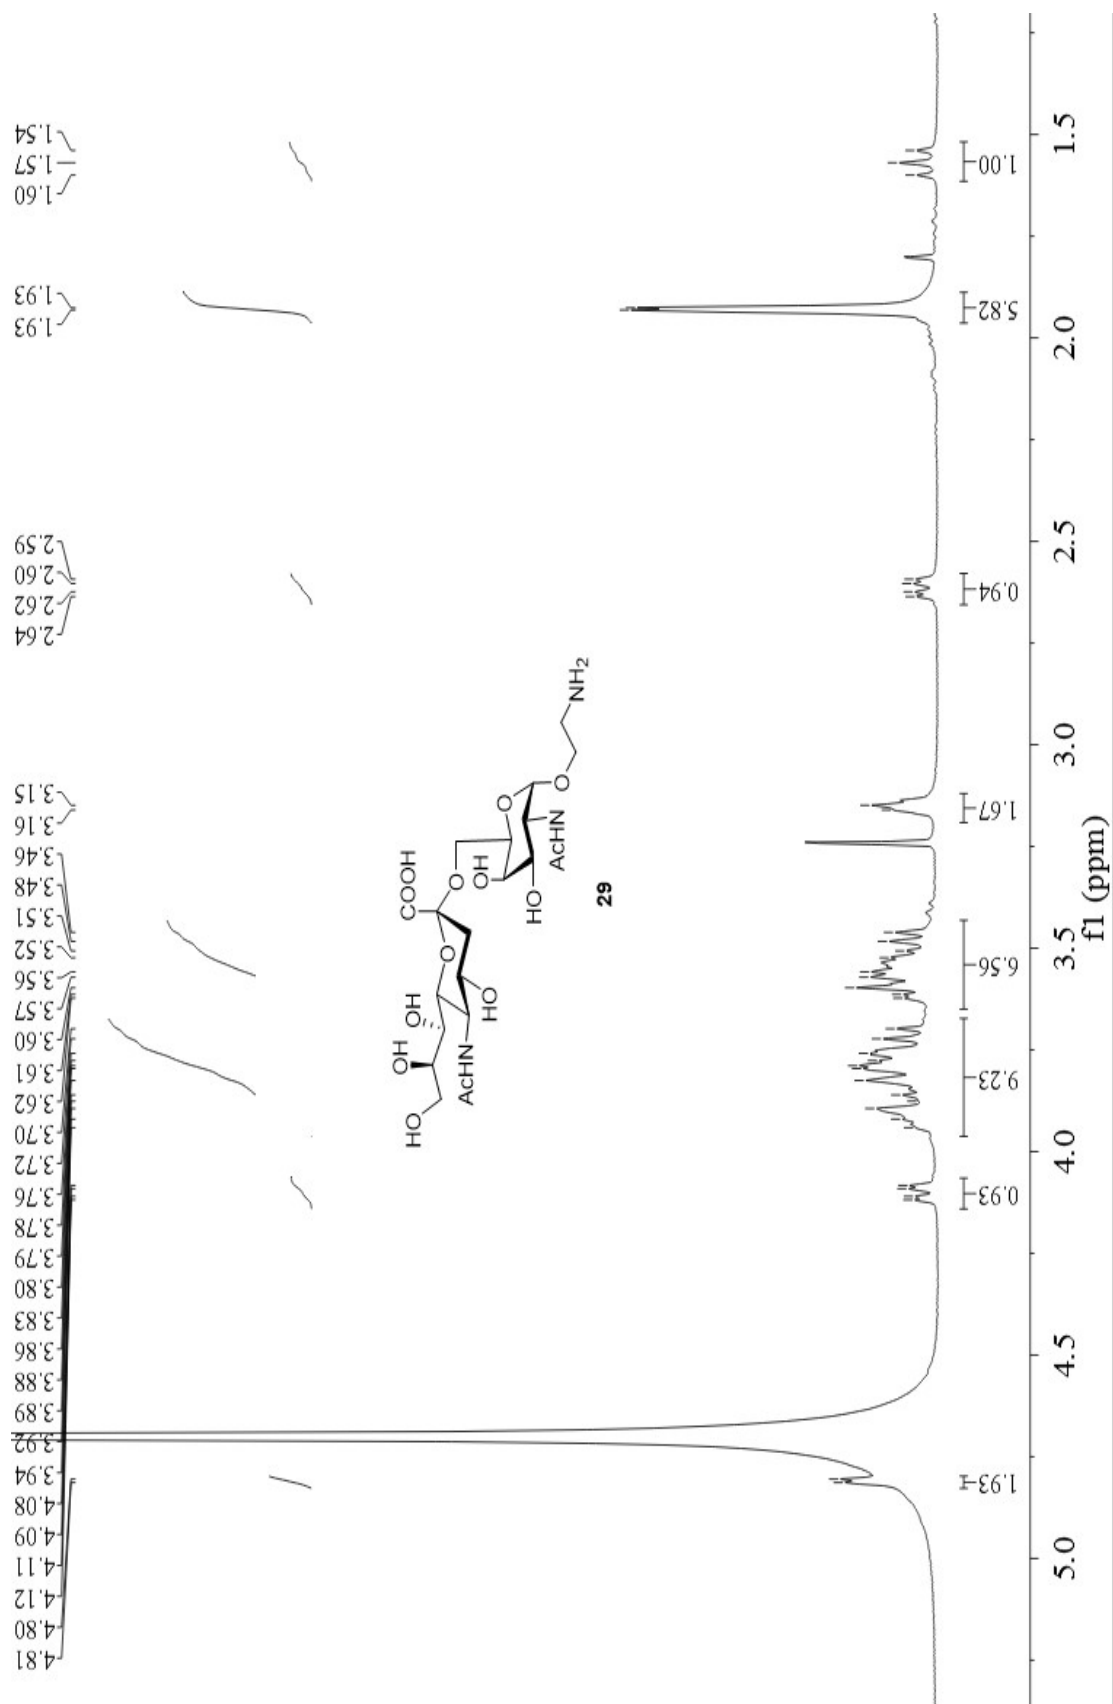

<sup>1</sup>H NMR Spectrum of compound **29** (D<sub>2</sub>O, 400 MHz)

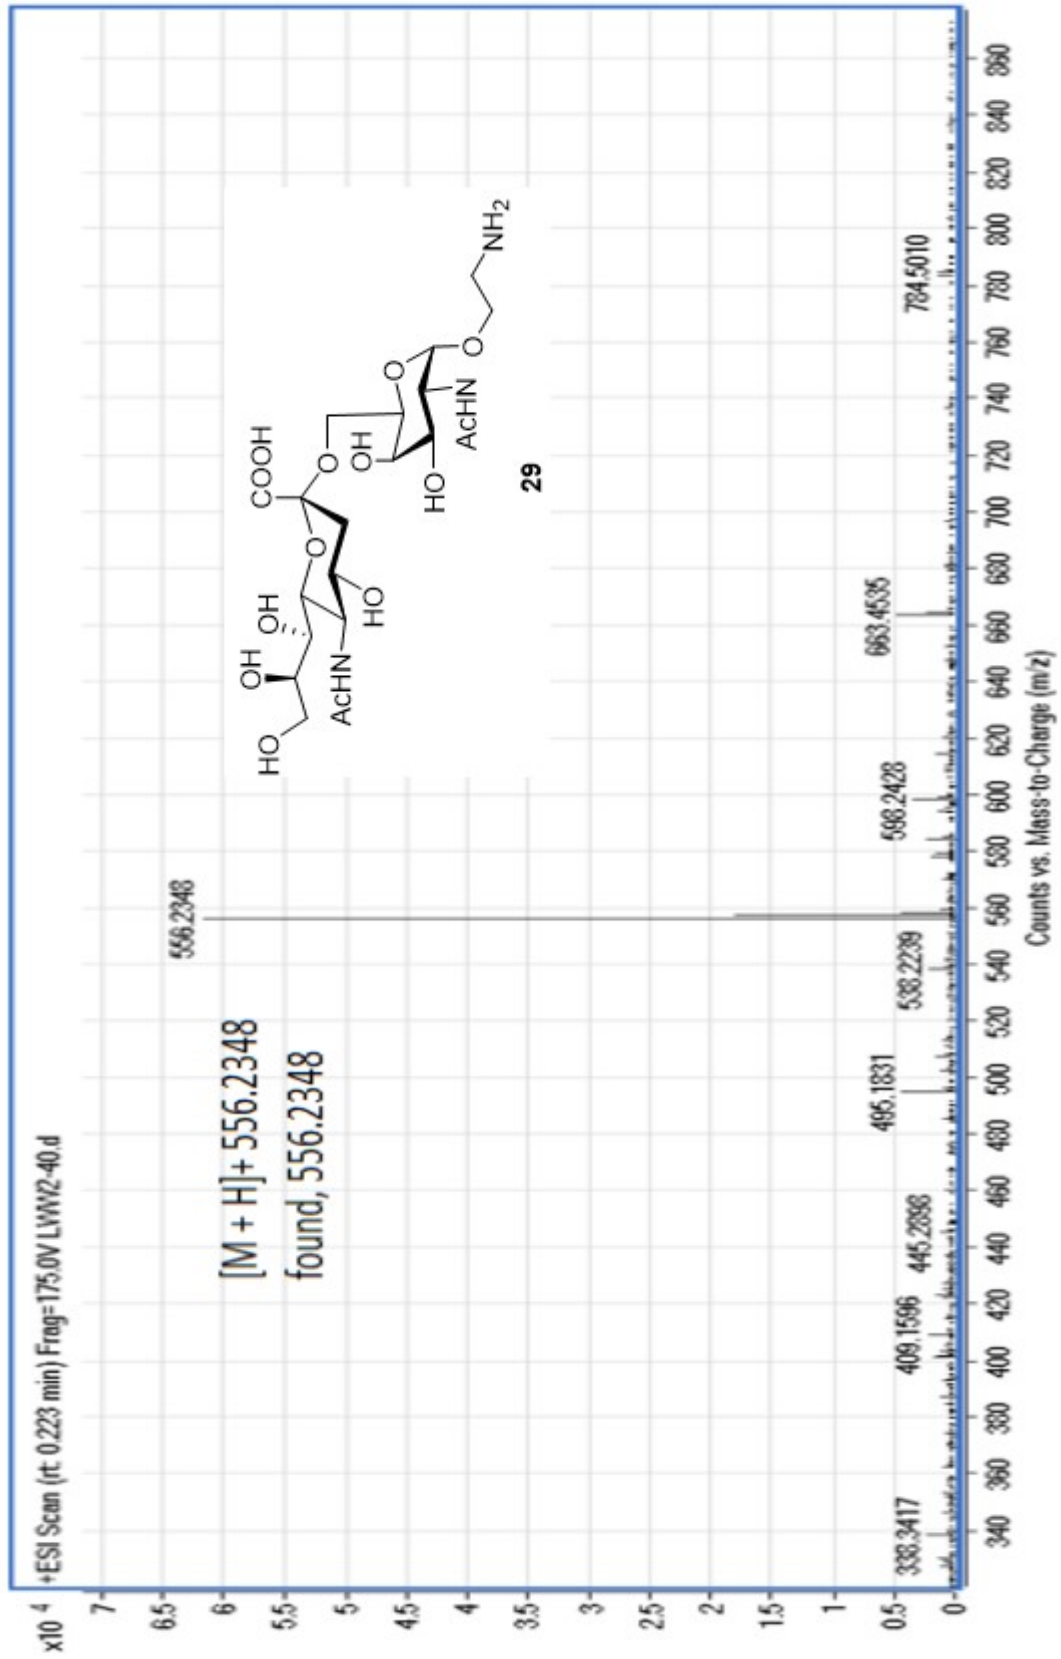

HR-ESI-MS spectrum of conjugate 29

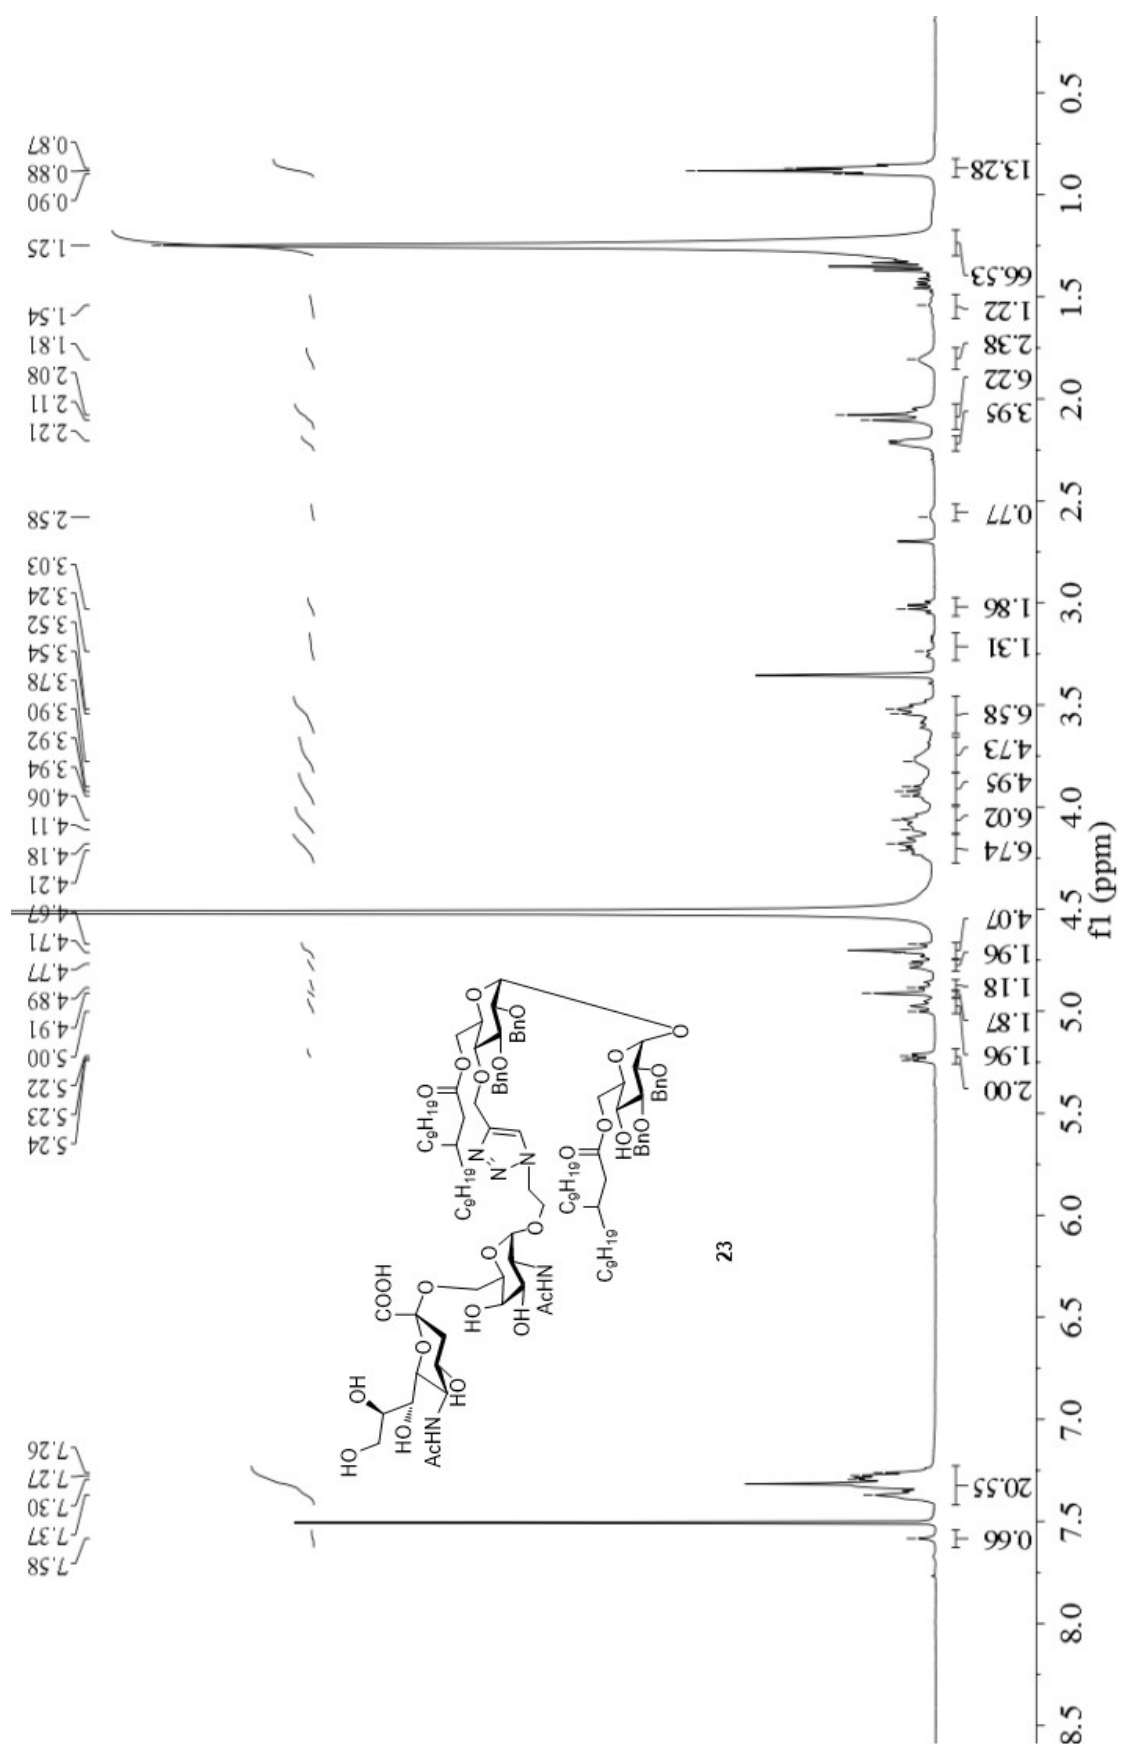

<sup>1</sup>H NMR Spectrum of compound **23** (CD<sub>3</sub>OD-CDCl<sub>3</sub>=1 : 4, 400 MHz)

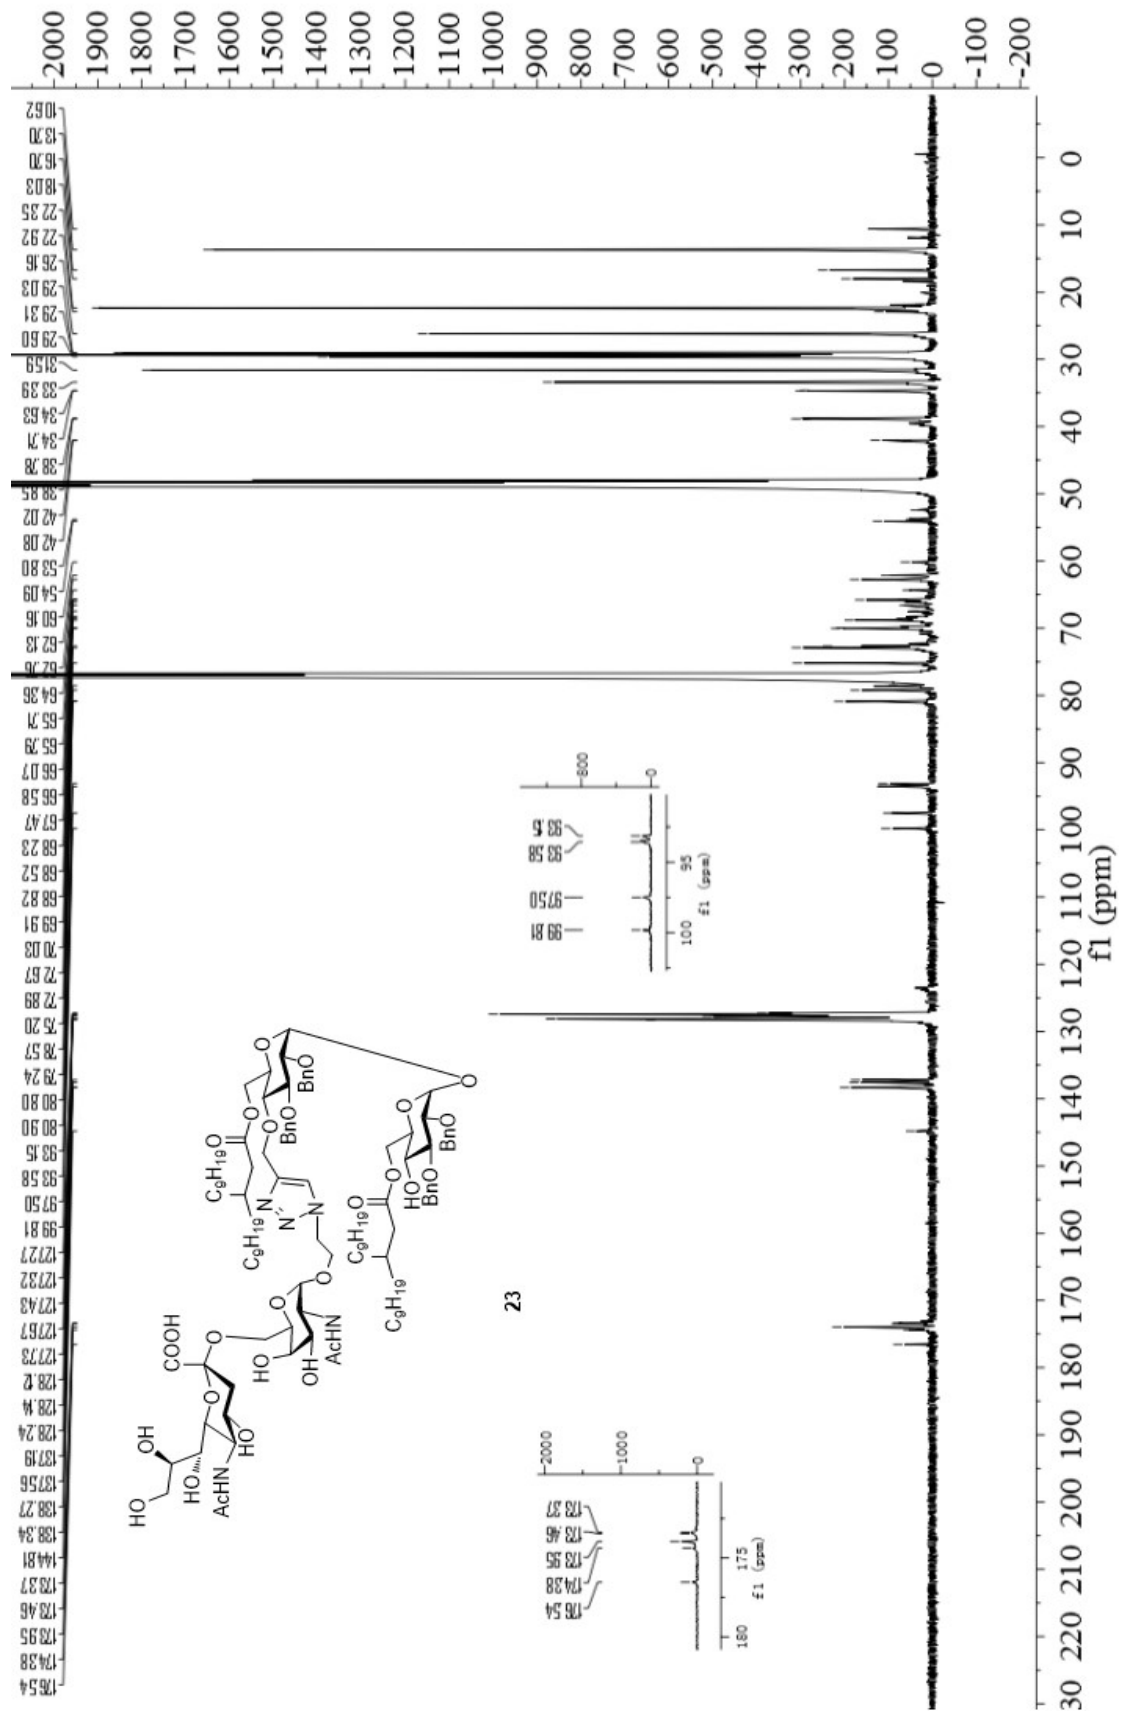

<sup>13</sup>C NMR Spectrum of compound **23** (CD<sub>3</sub>OD-CDCl<sub>3</sub>=1 : 4, 400 MHz)

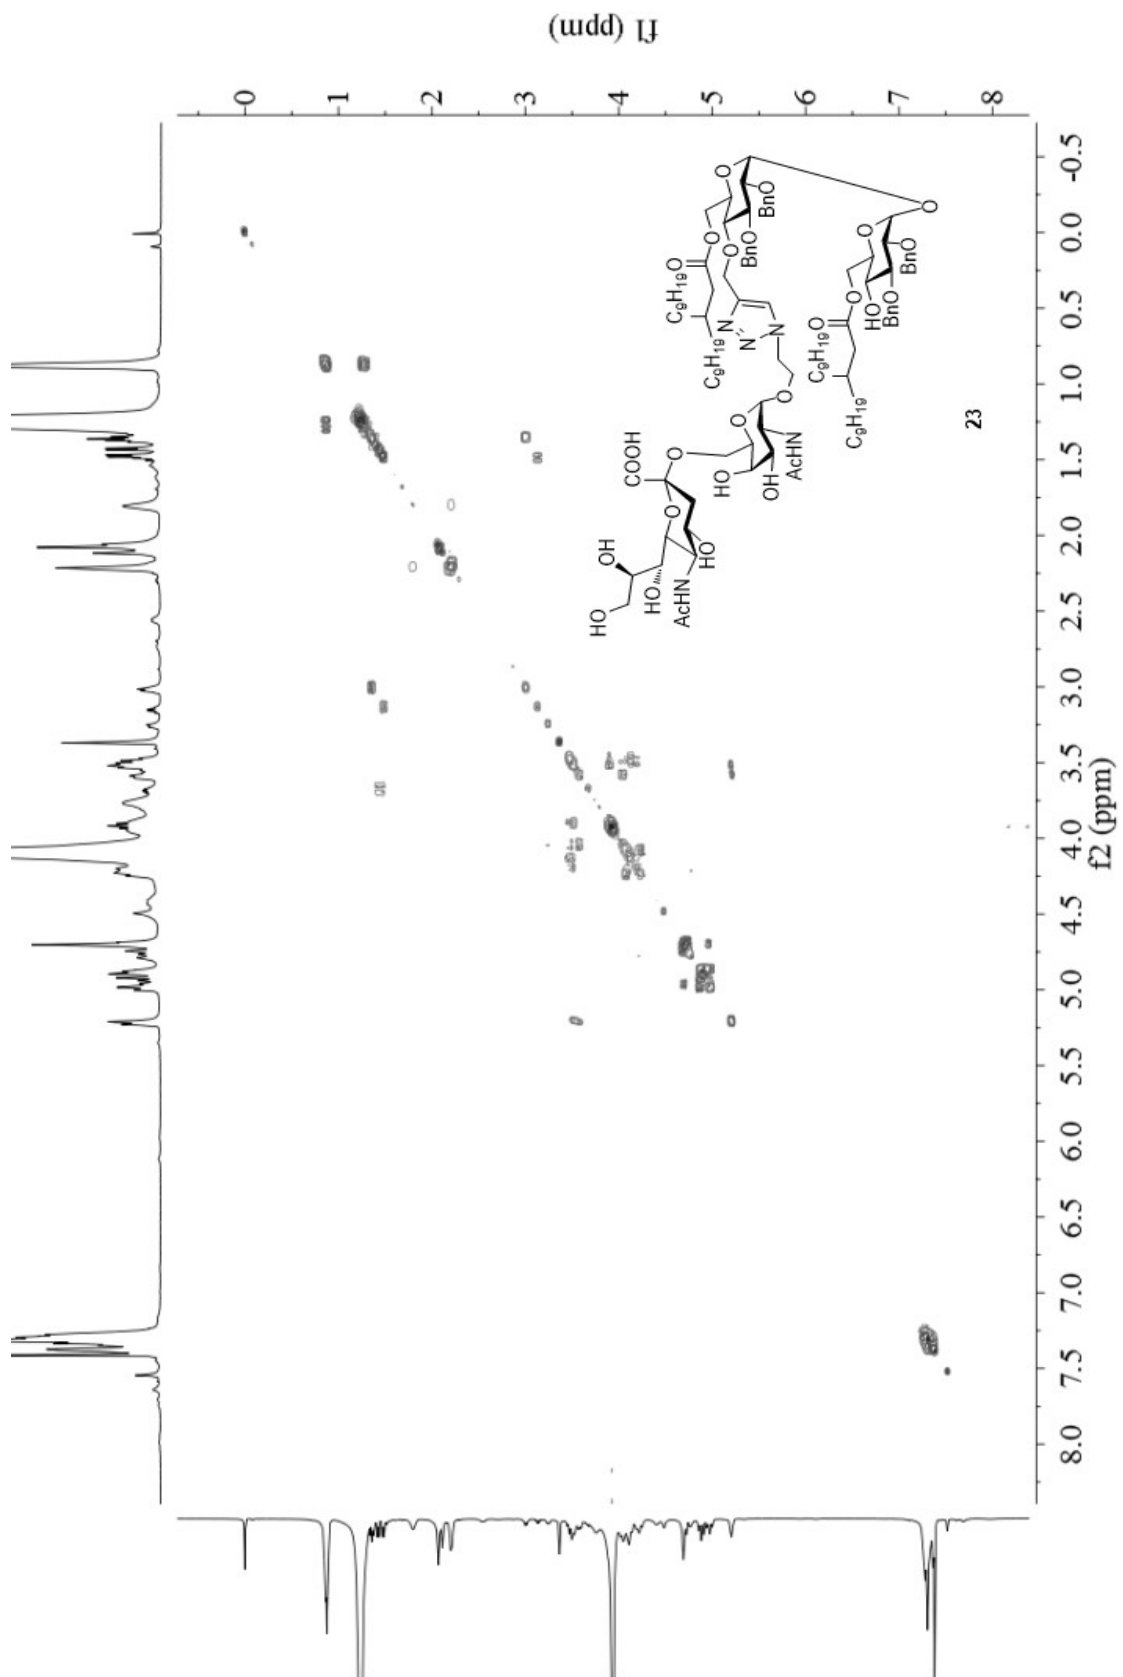

$^1\text{H}$ - $^1\text{H}$  COSY NMR Spectrum of compound **23** ( $\text{CD}_3\text{OD}$ - $\text{CDCl}_3=1 : 4$ , 400 MHz)



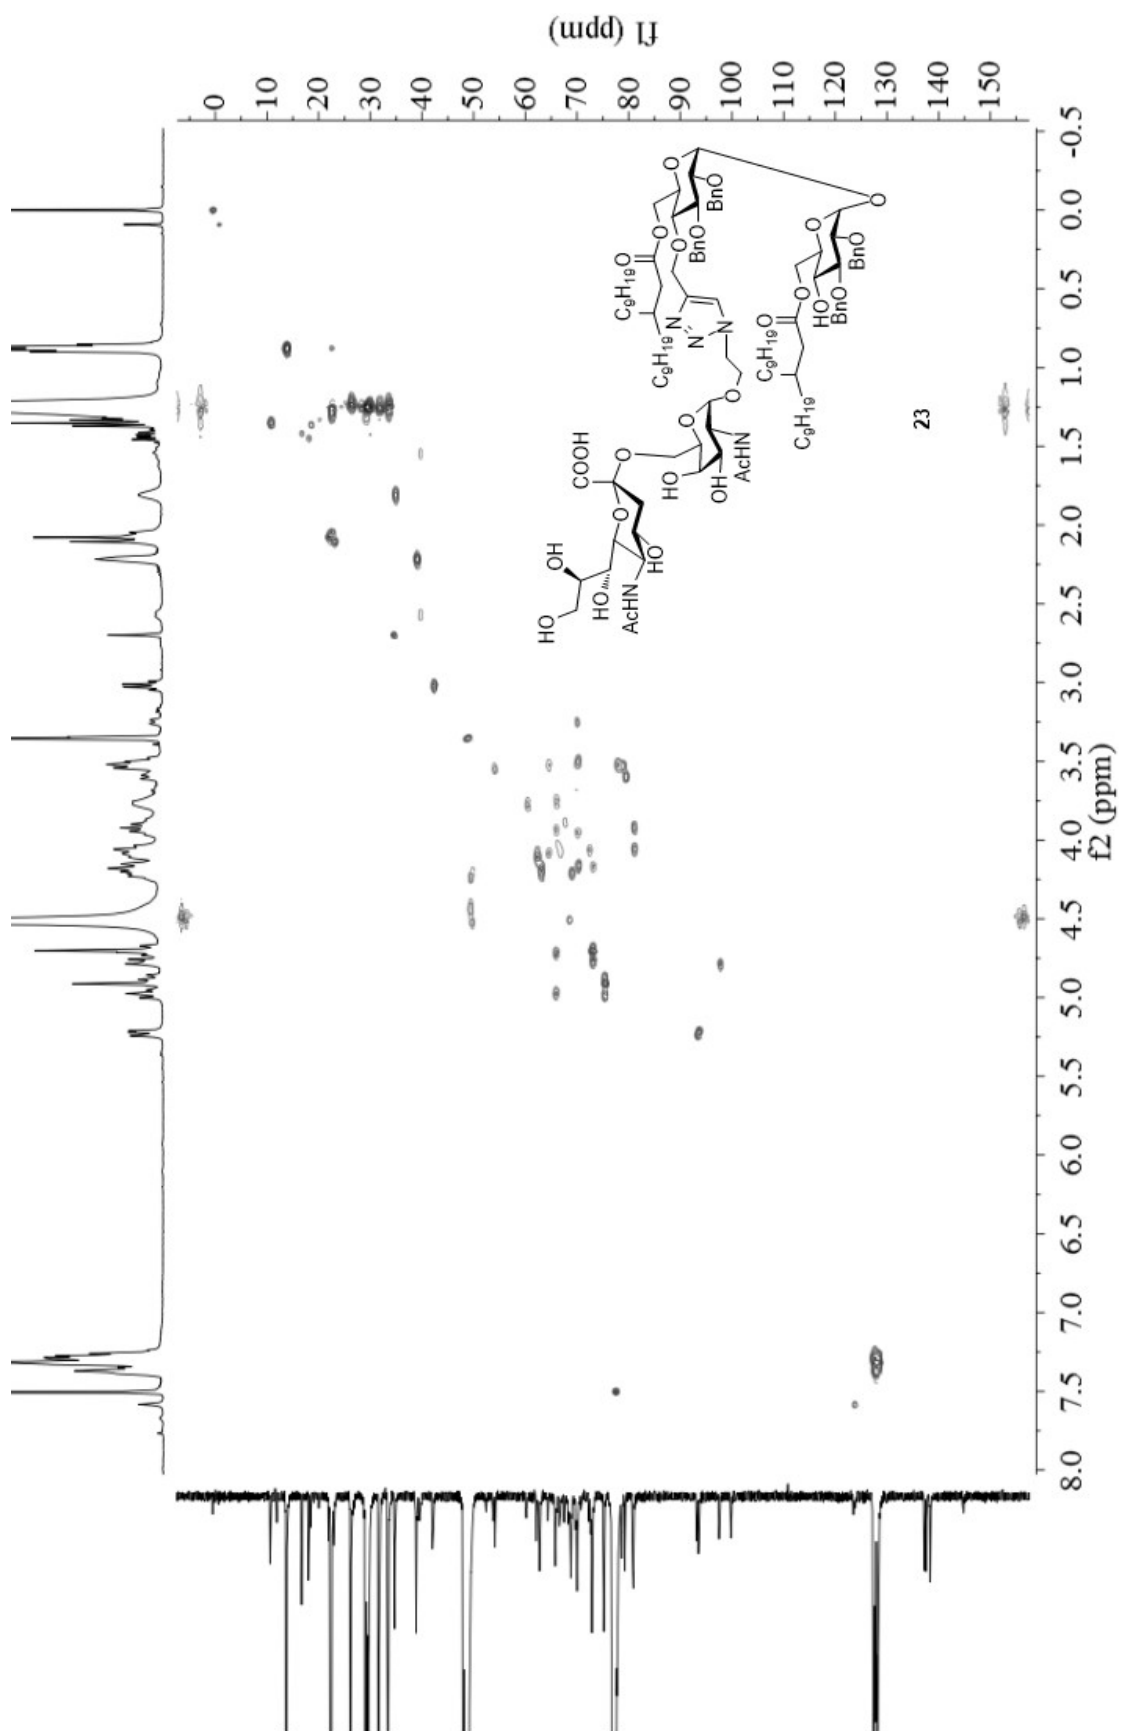

HSQC NMR Spectrum of compound **23** (CD<sub>3</sub>OD-CDCl<sub>3</sub>=1 : 4, 400 MHz)

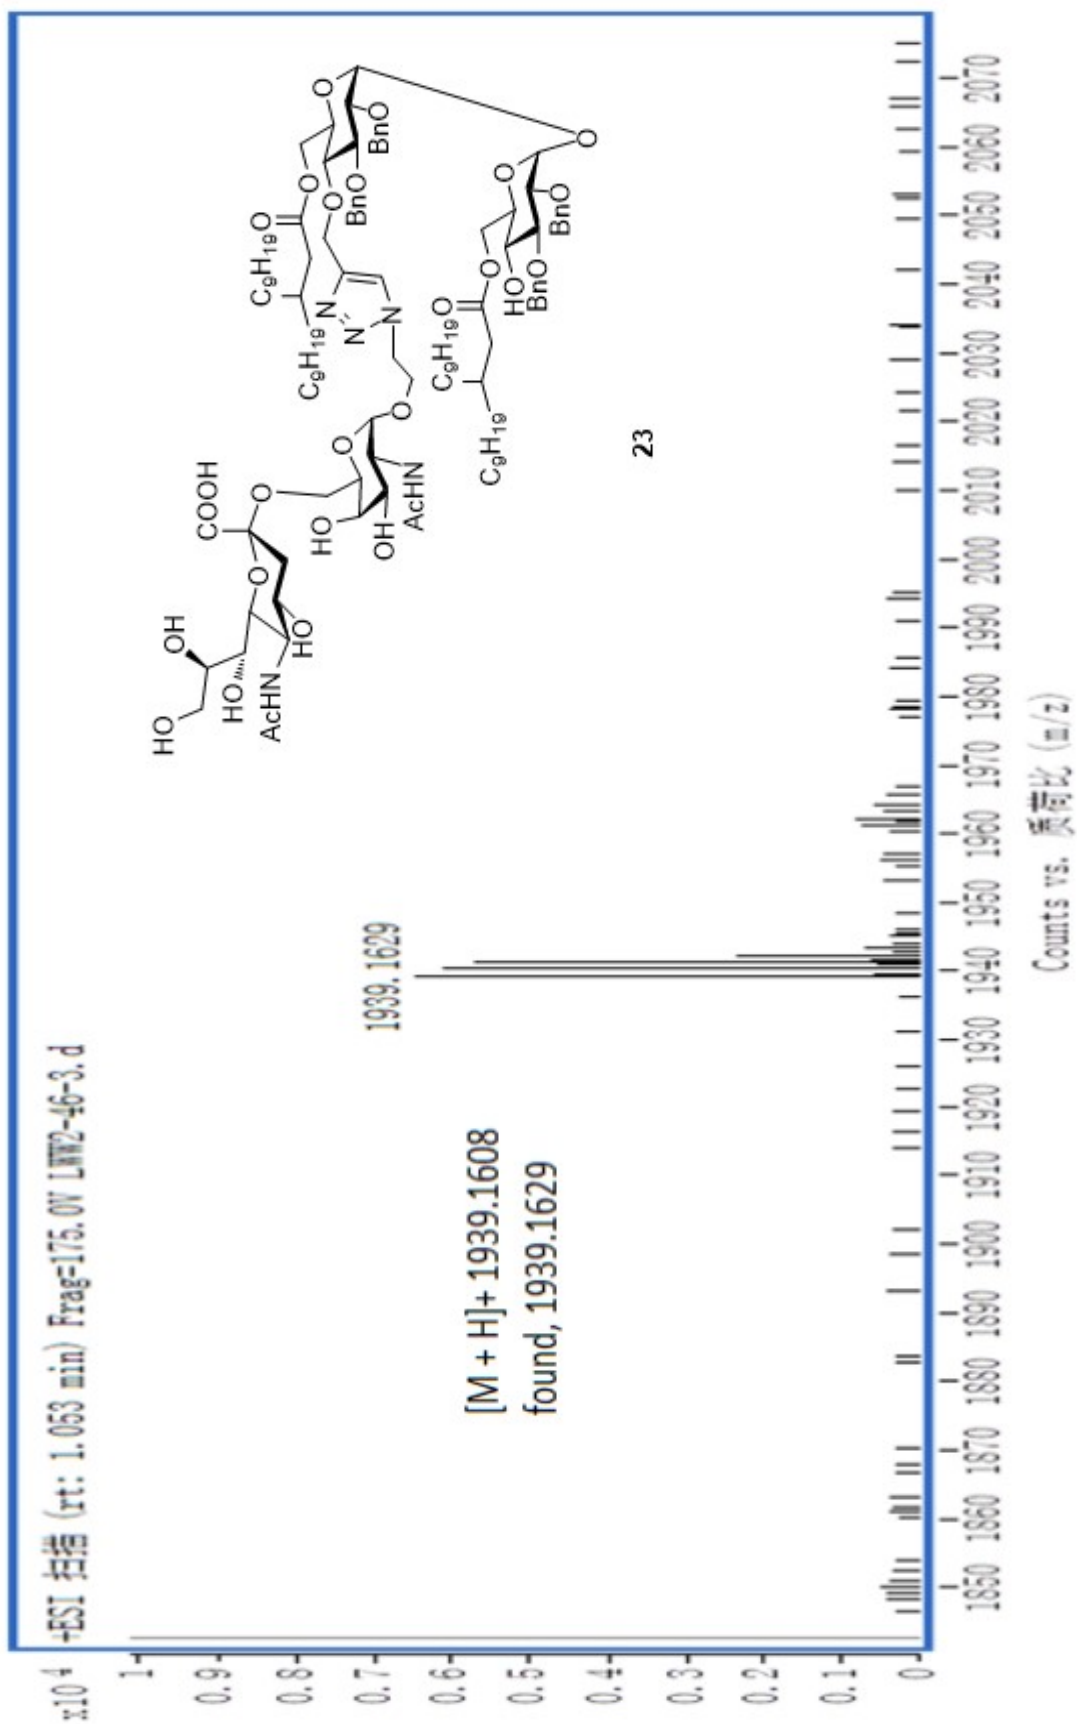

HR-ESI-MS spectrum of conjugate 23

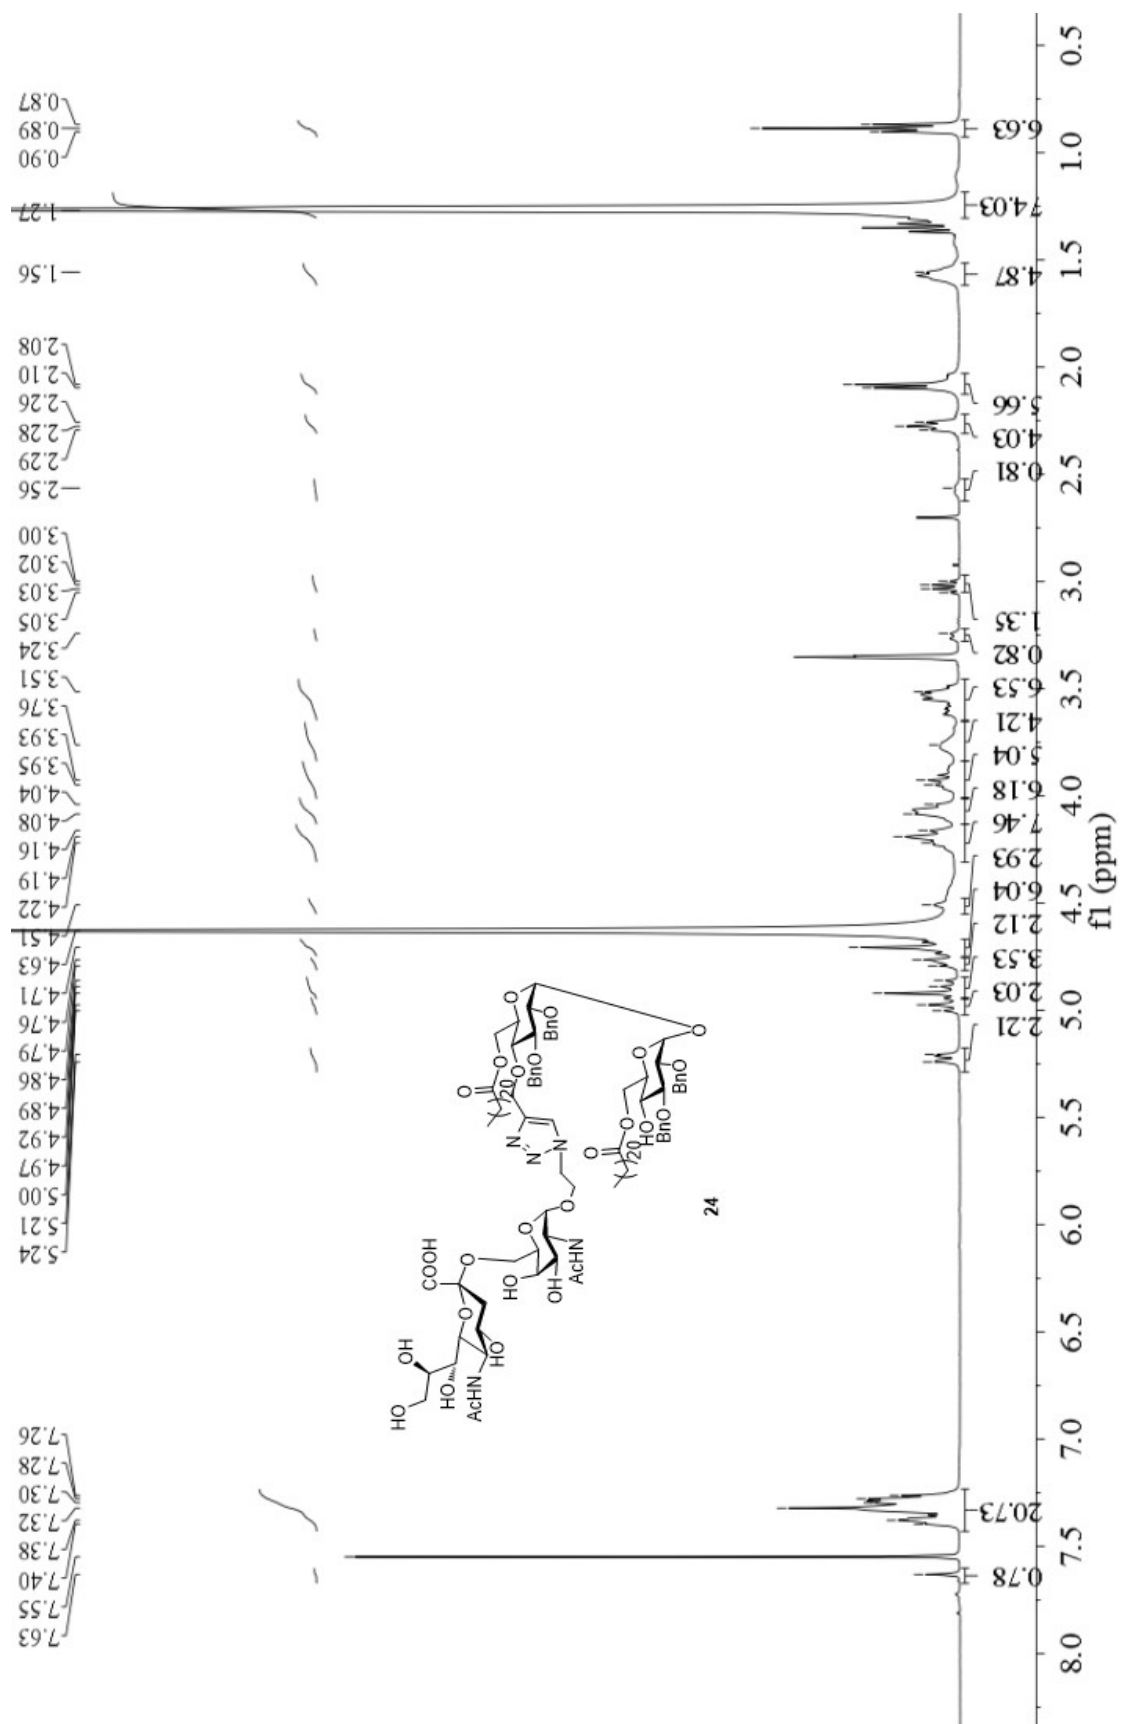

<sup>1</sup>H NMR Spectrum of compound 24 (CD<sub>3</sub>OD-CDCl<sub>3</sub>=1 : 4, 400 MHz)

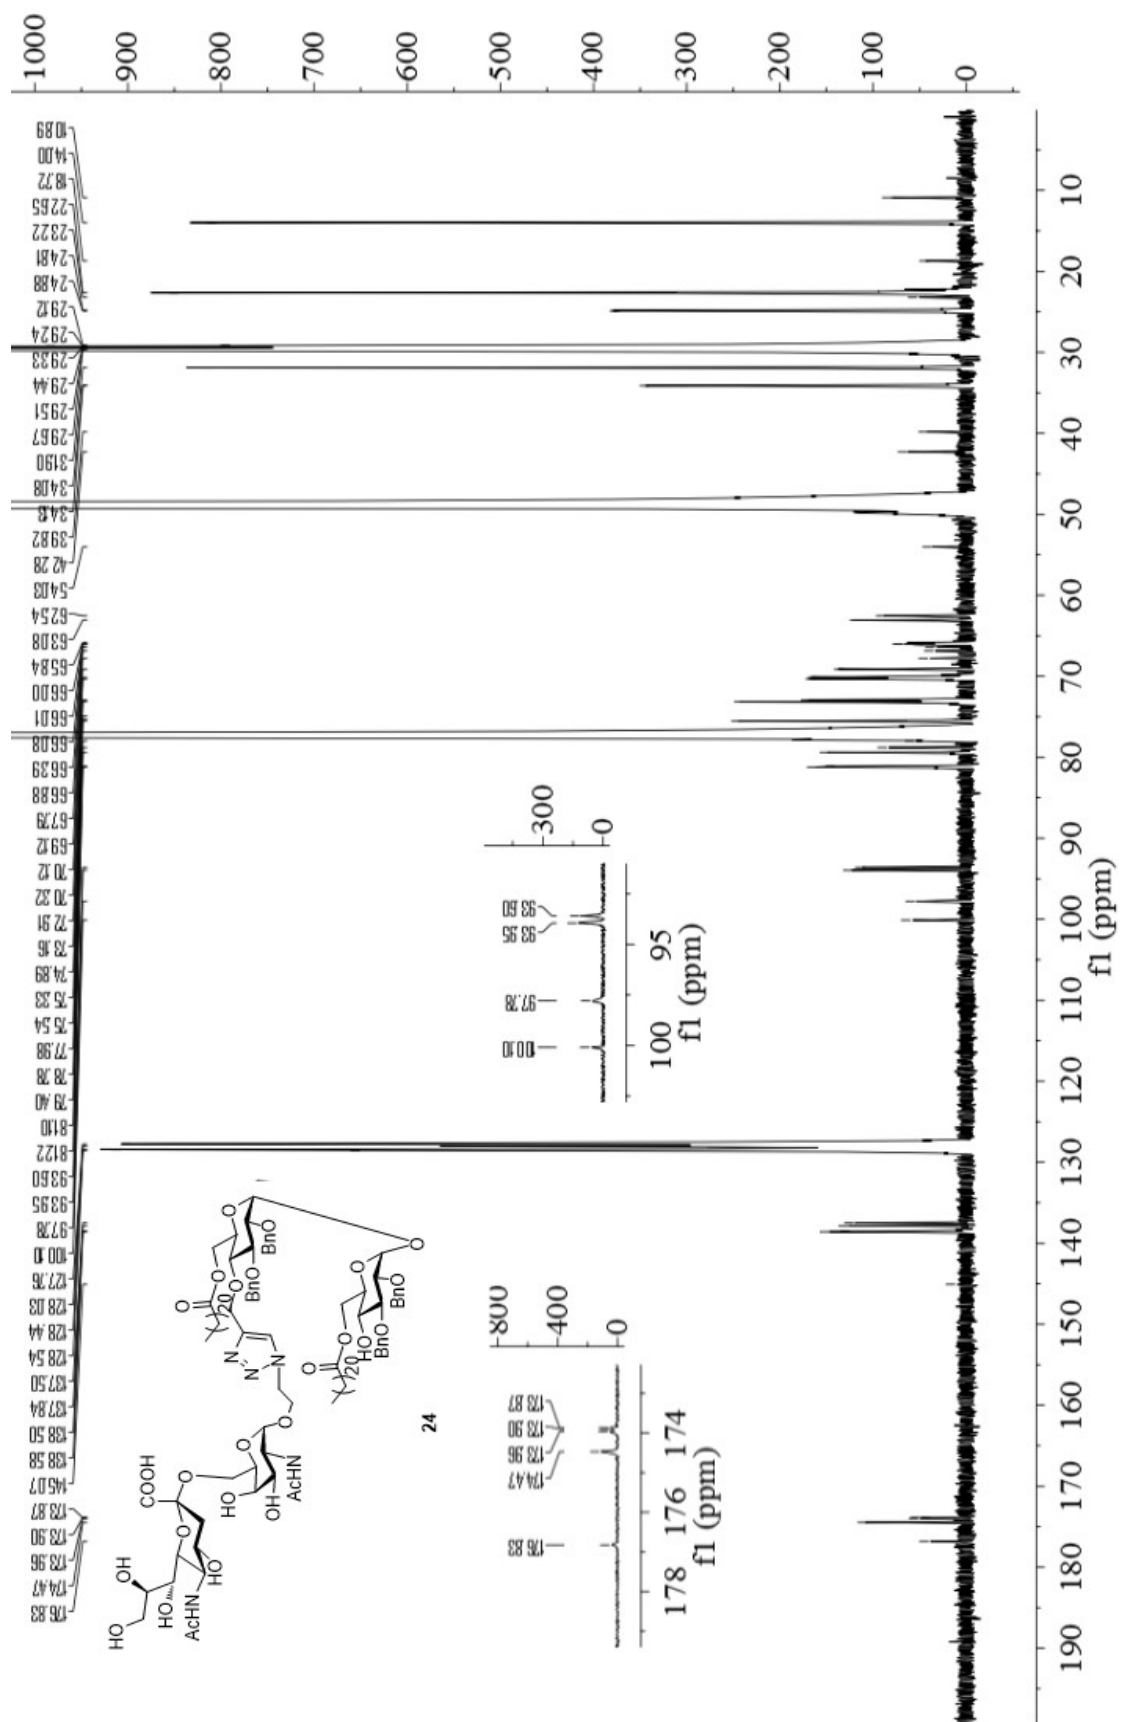

<sup>13</sup>C NMR Spectrum of compound **24** (CD<sub>3</sub>OD-CDCl<sub>3</sub>=1 : 4, 400 MHz)

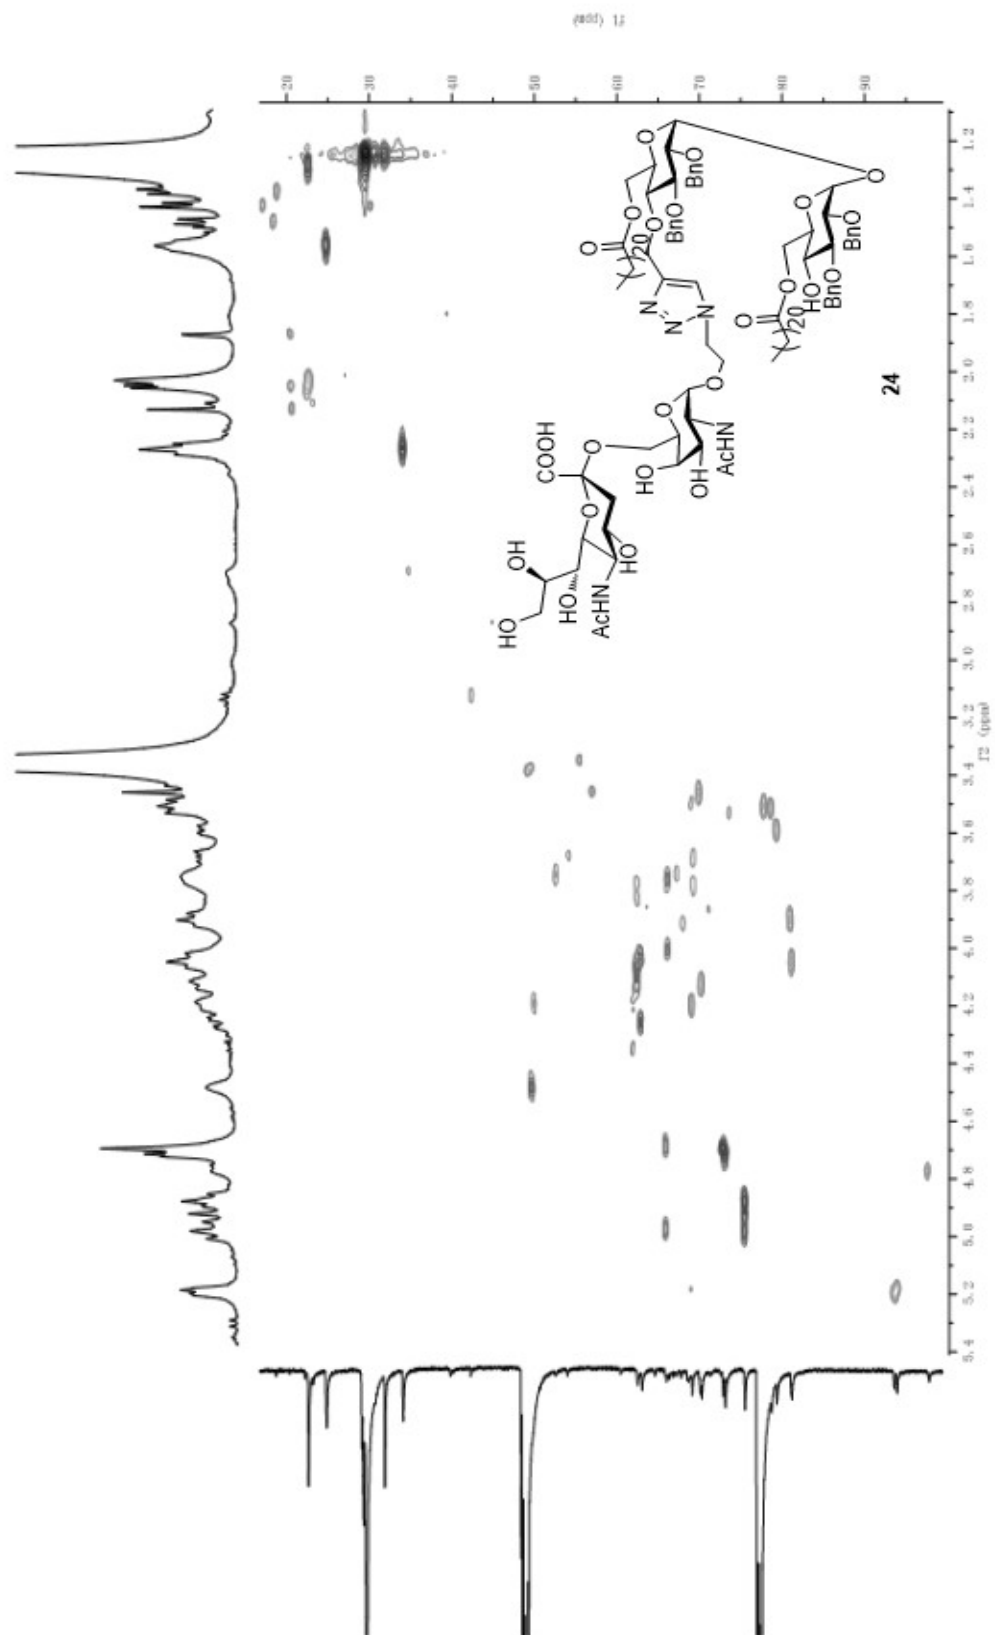

$^1\text{H}$ - $^1\text{H}$  COSY NMR Spectrum of compound **24** ( $\text{CD}_3\text{OD}-\text{CDCl}_3=1 : 4$ , 400 MHz)

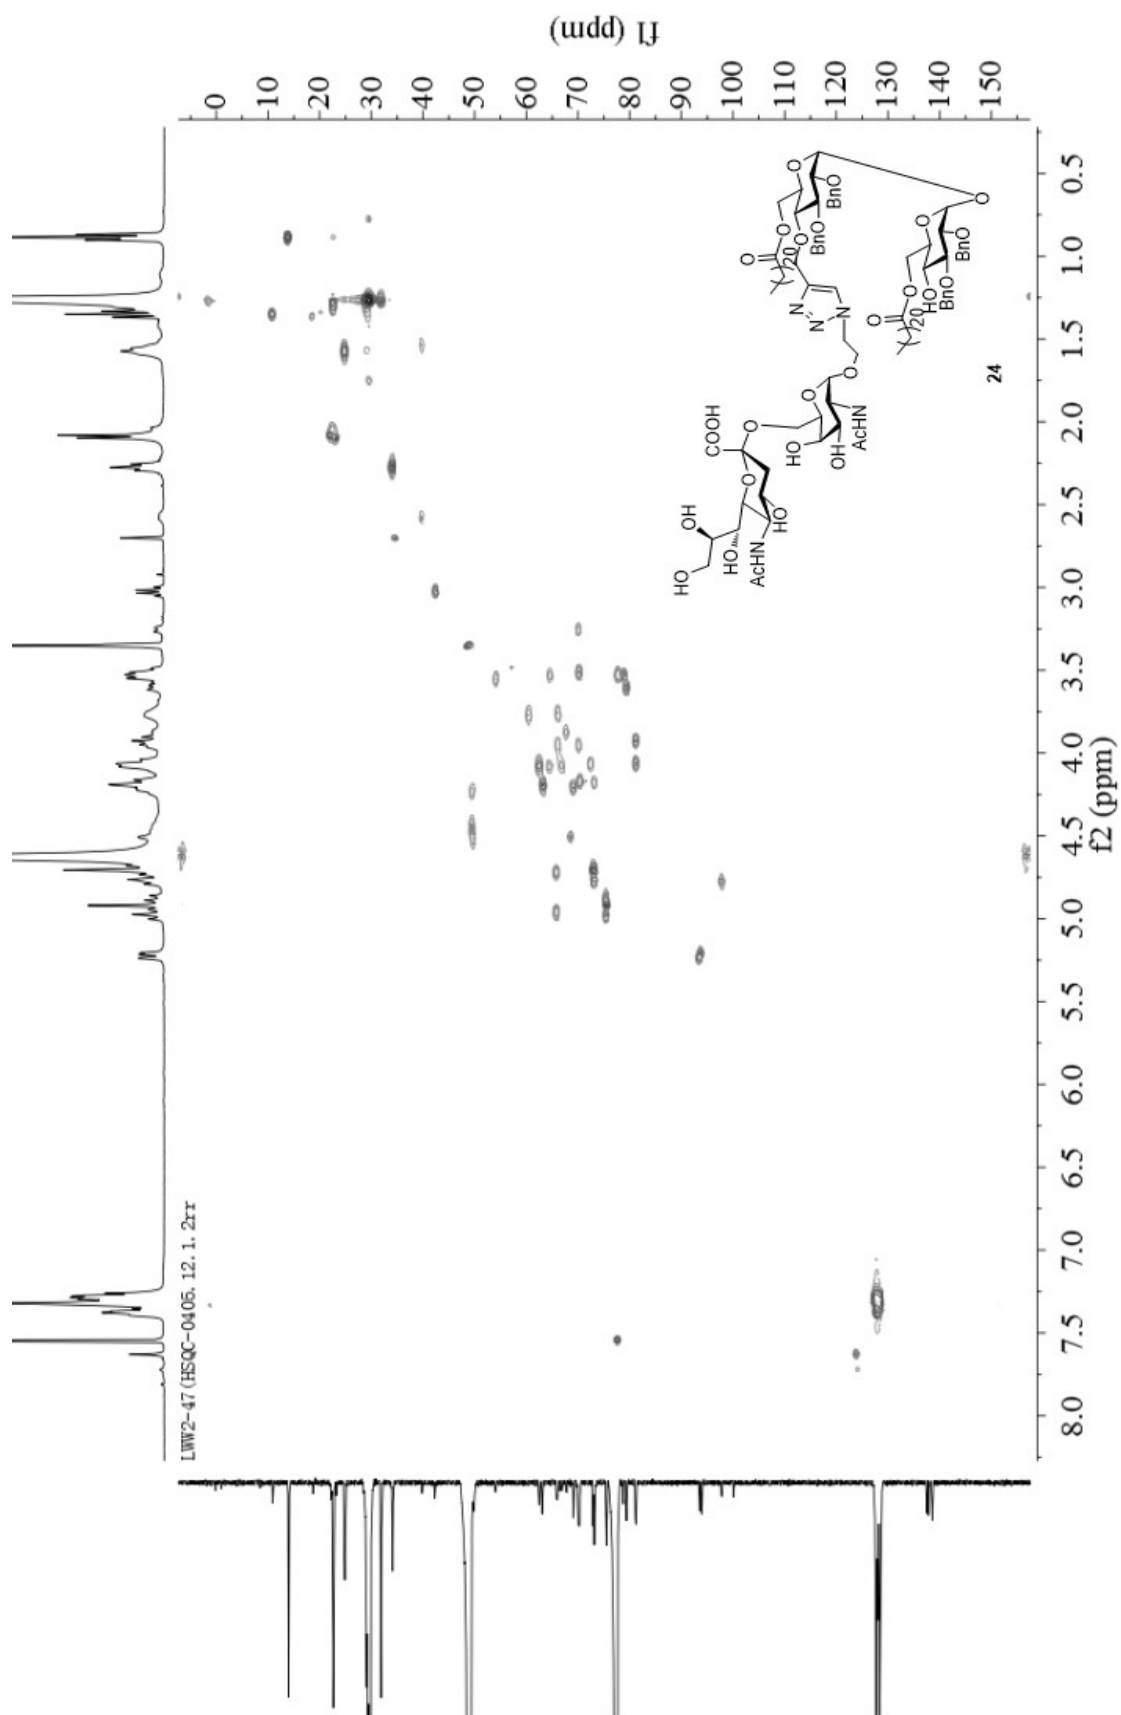

HSQC Spectrum of compound **24** (CD<sub>3</sub>OD-CDCl<sub>3</sub>=1 : 4, 400 MHz)

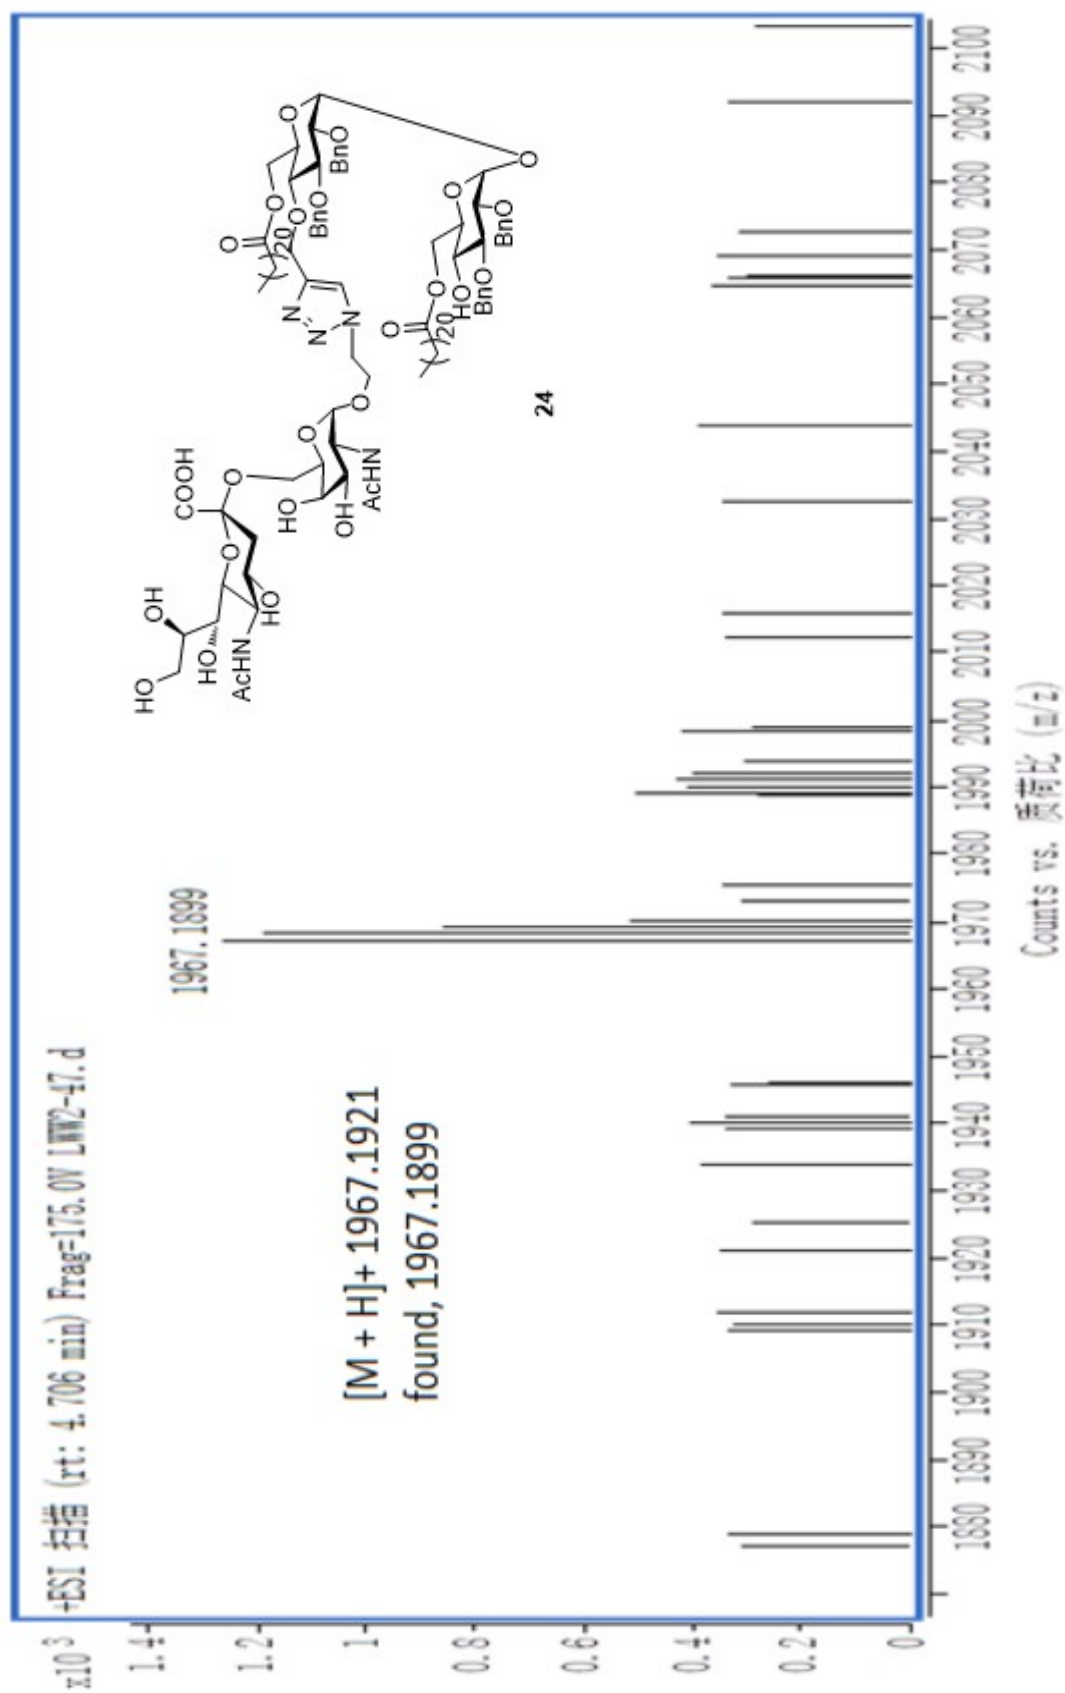

HR-ESI-MS spectrum of conjugate 24

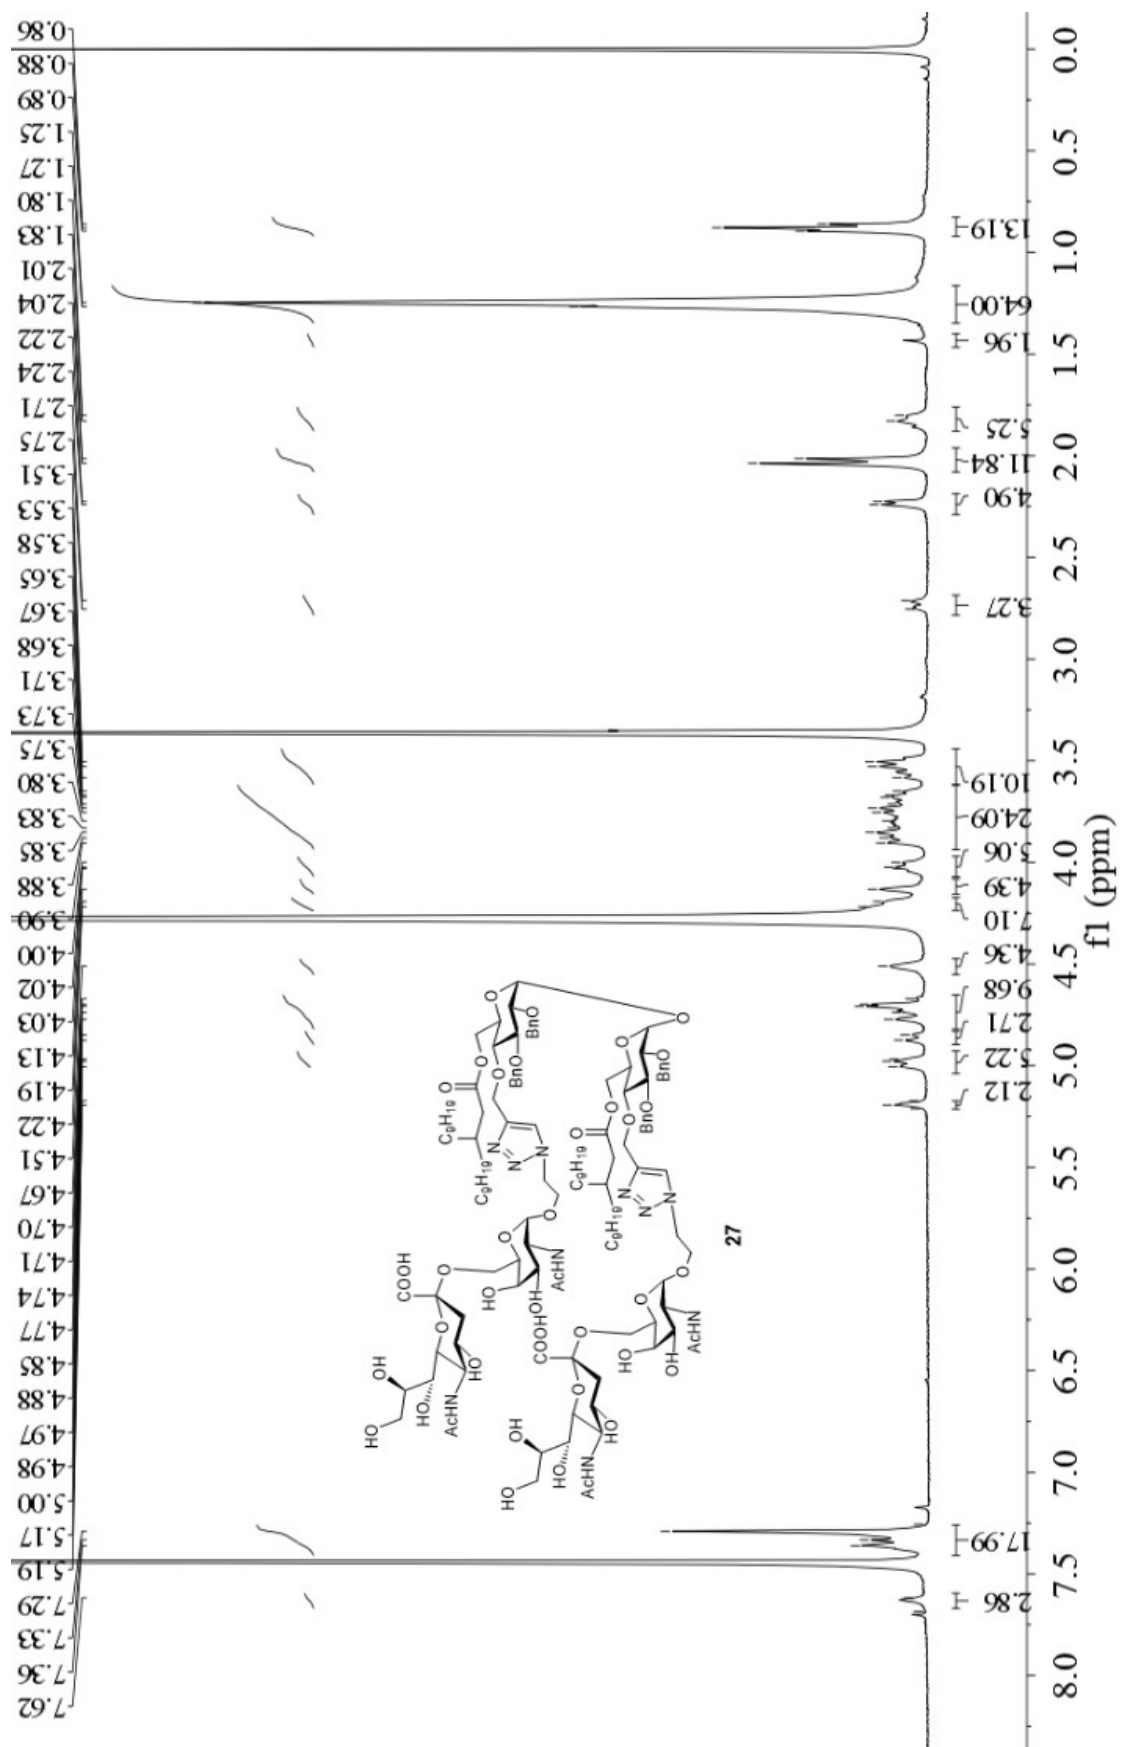

$^1\text{H}$  NMR Spectrum of compound **27** (MeOD:  $\text{CDCl}_3 = 1:6$ ; 400 MHz)



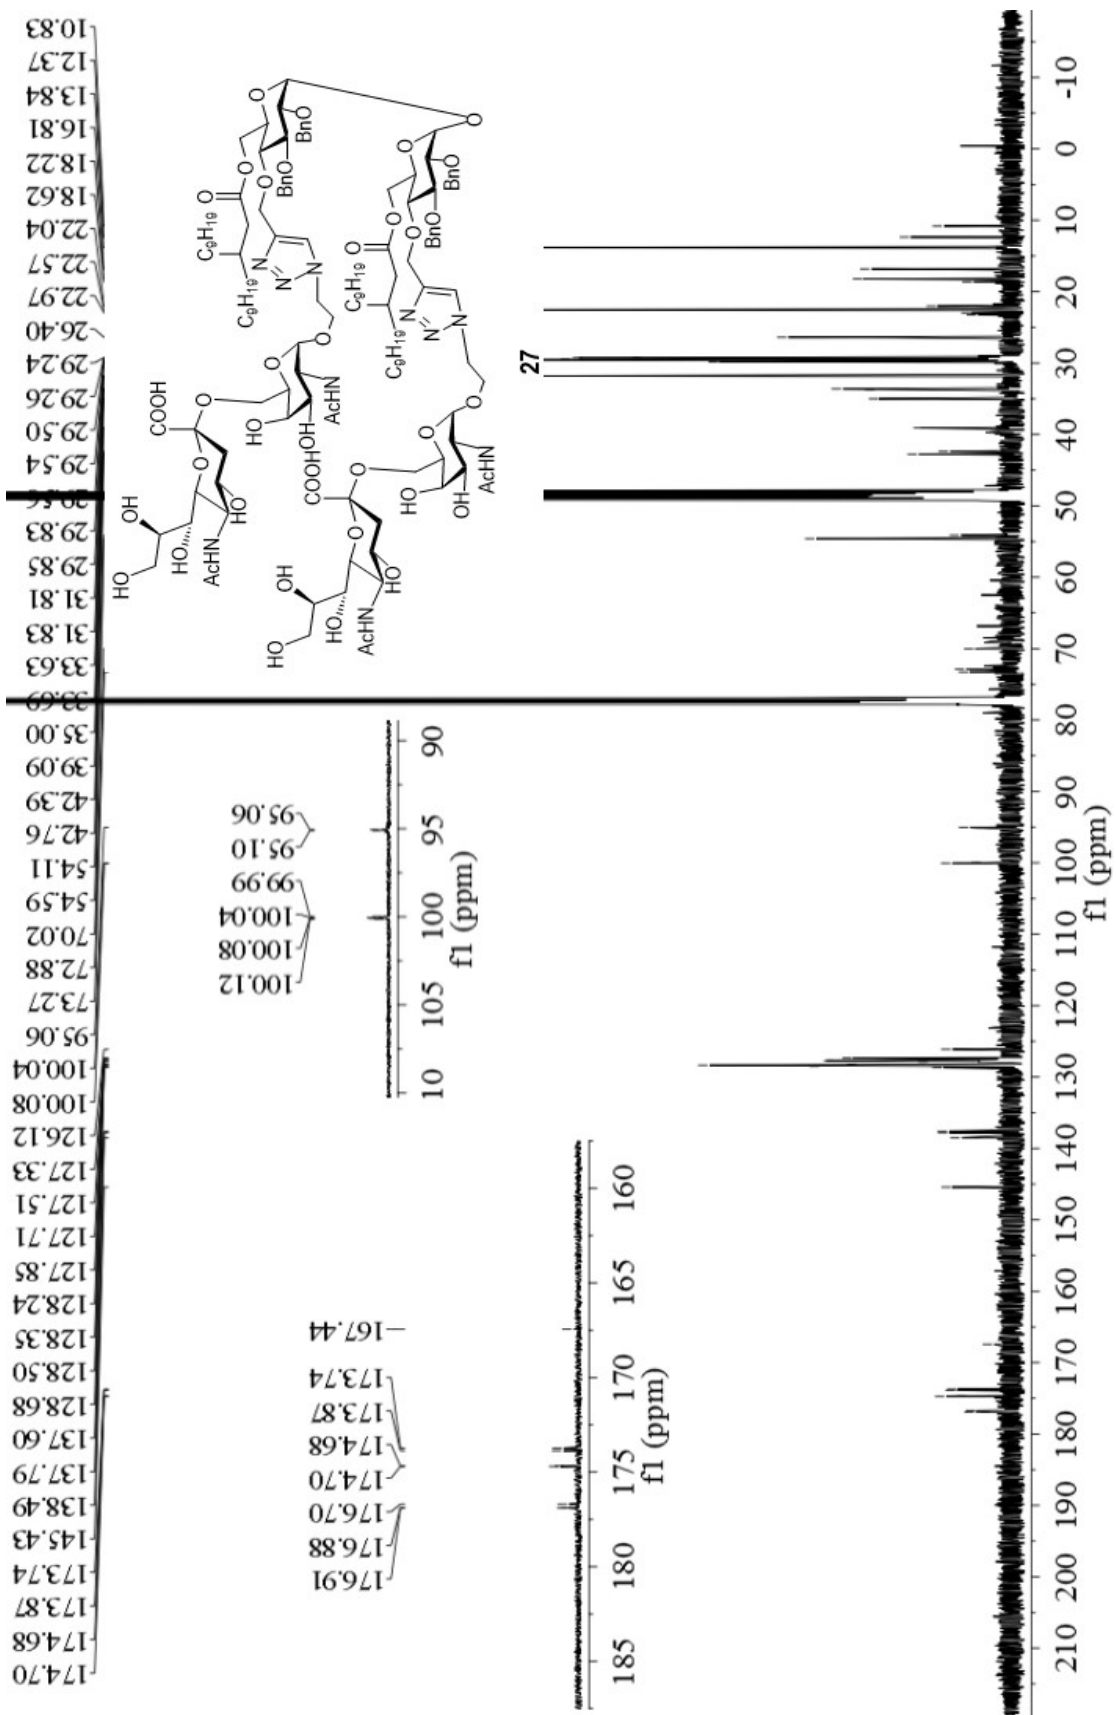

<sup>13</sup>C NMR Spectrum of compound 27 (MeOD: CDCl<sub>3</sub> = 1:6; 400 MHz)

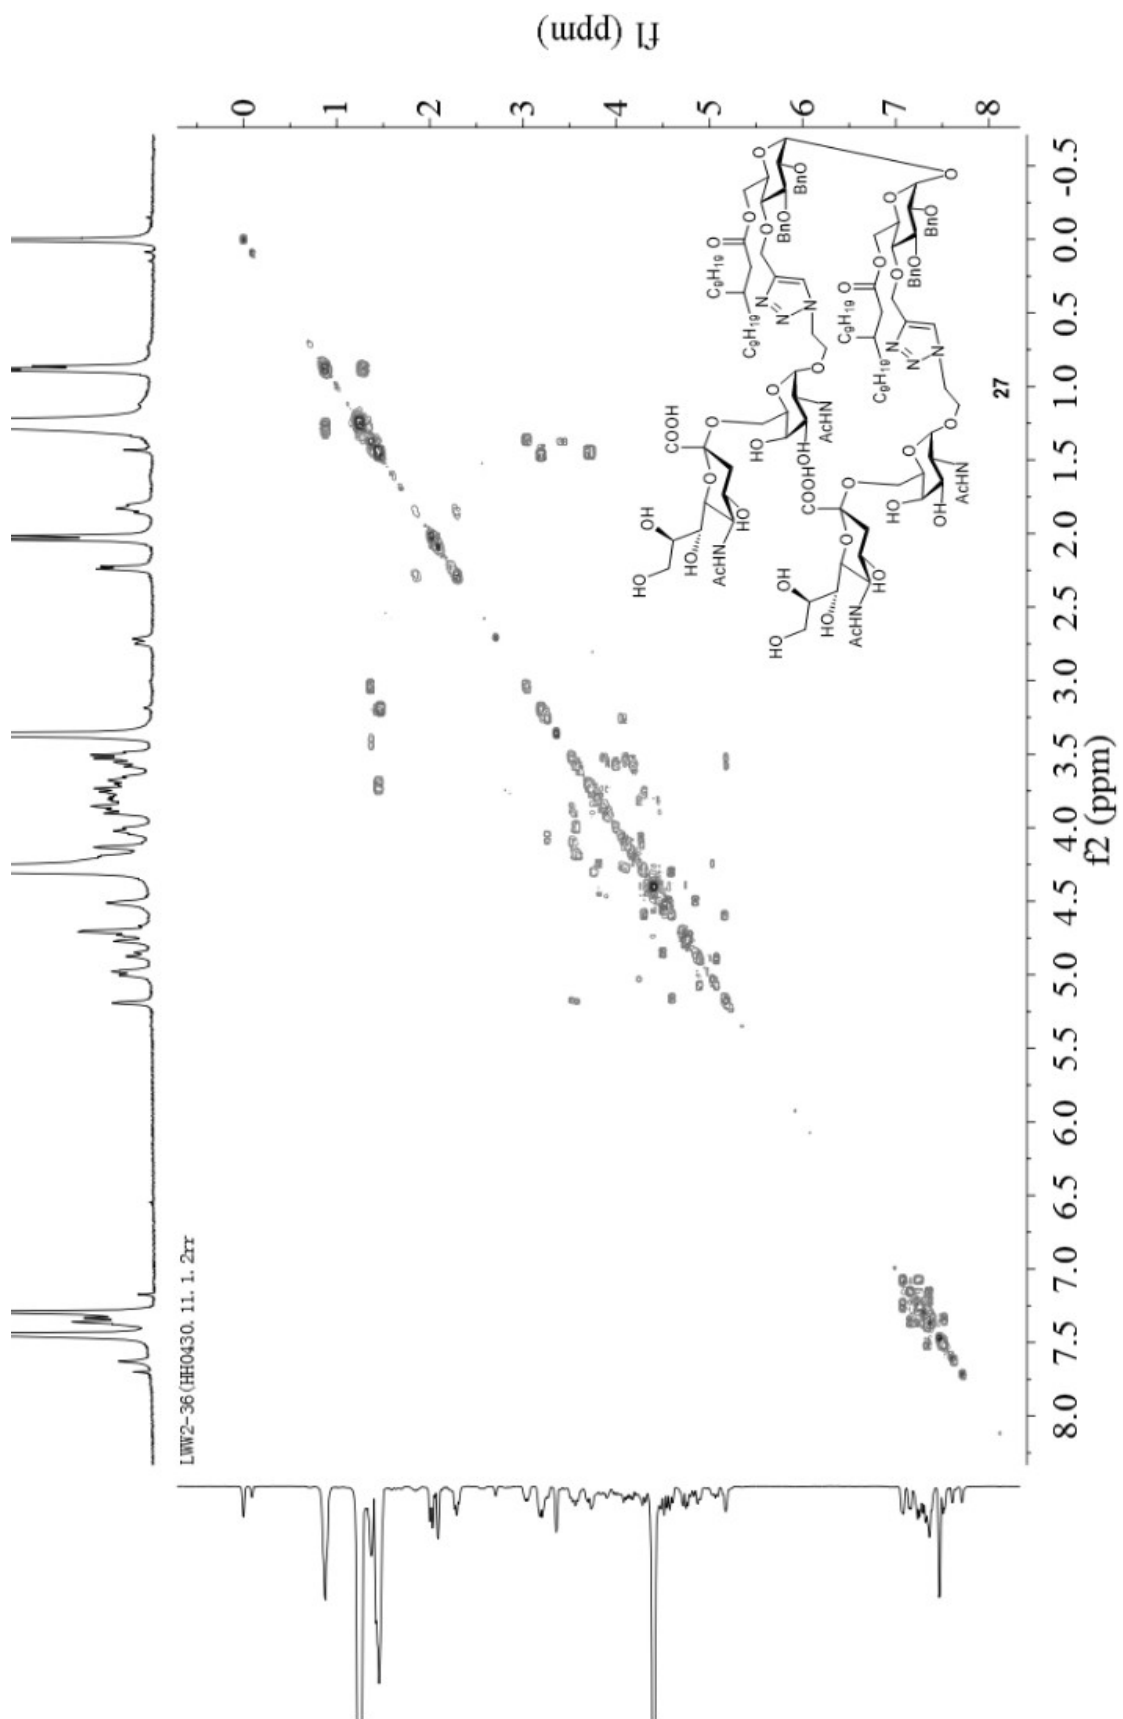

$^1\text{H}$ - $^1\text{H}$  COSY NMR Spectrum of compound **27** (MeOD:  $\text{CDCl}_3 = 1:6$ ; 400 MHz)

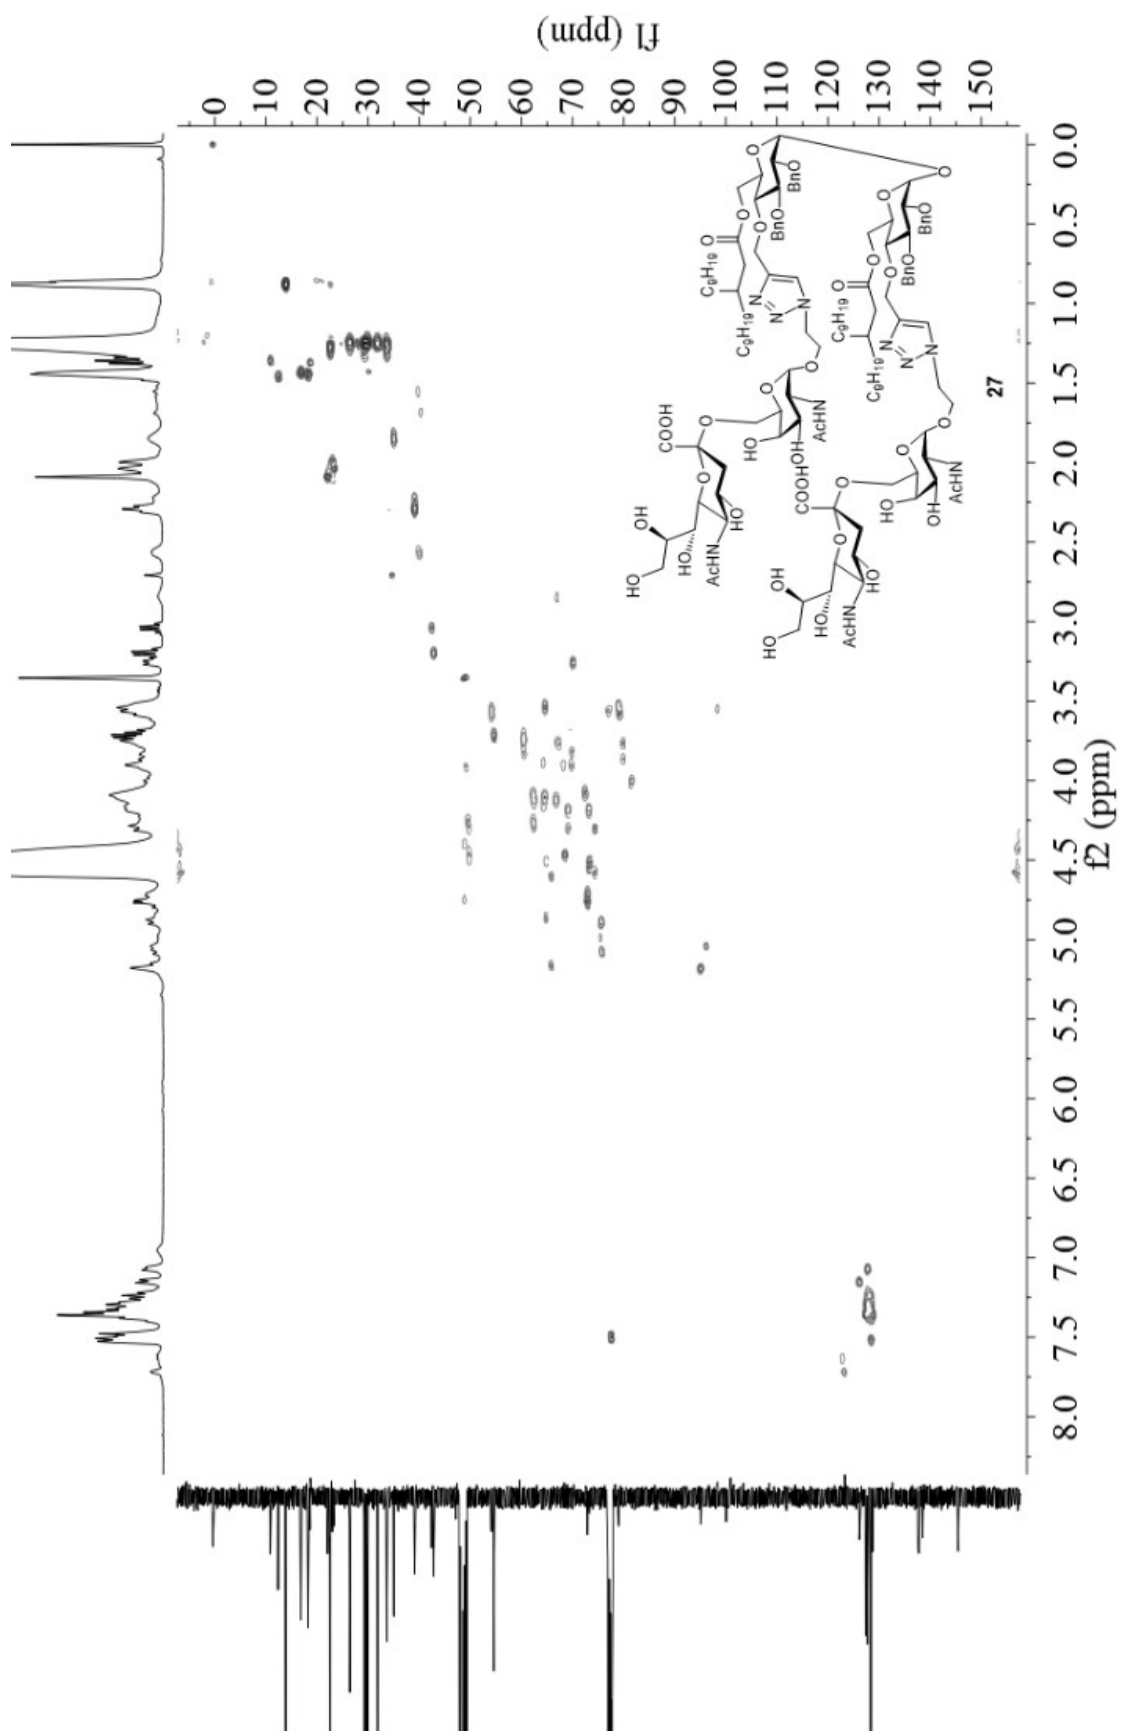

HSQC NMR Spectrum of compound **27** (MeOD: CDCl<sub>3</sub> = 1:6; 400 MHz)

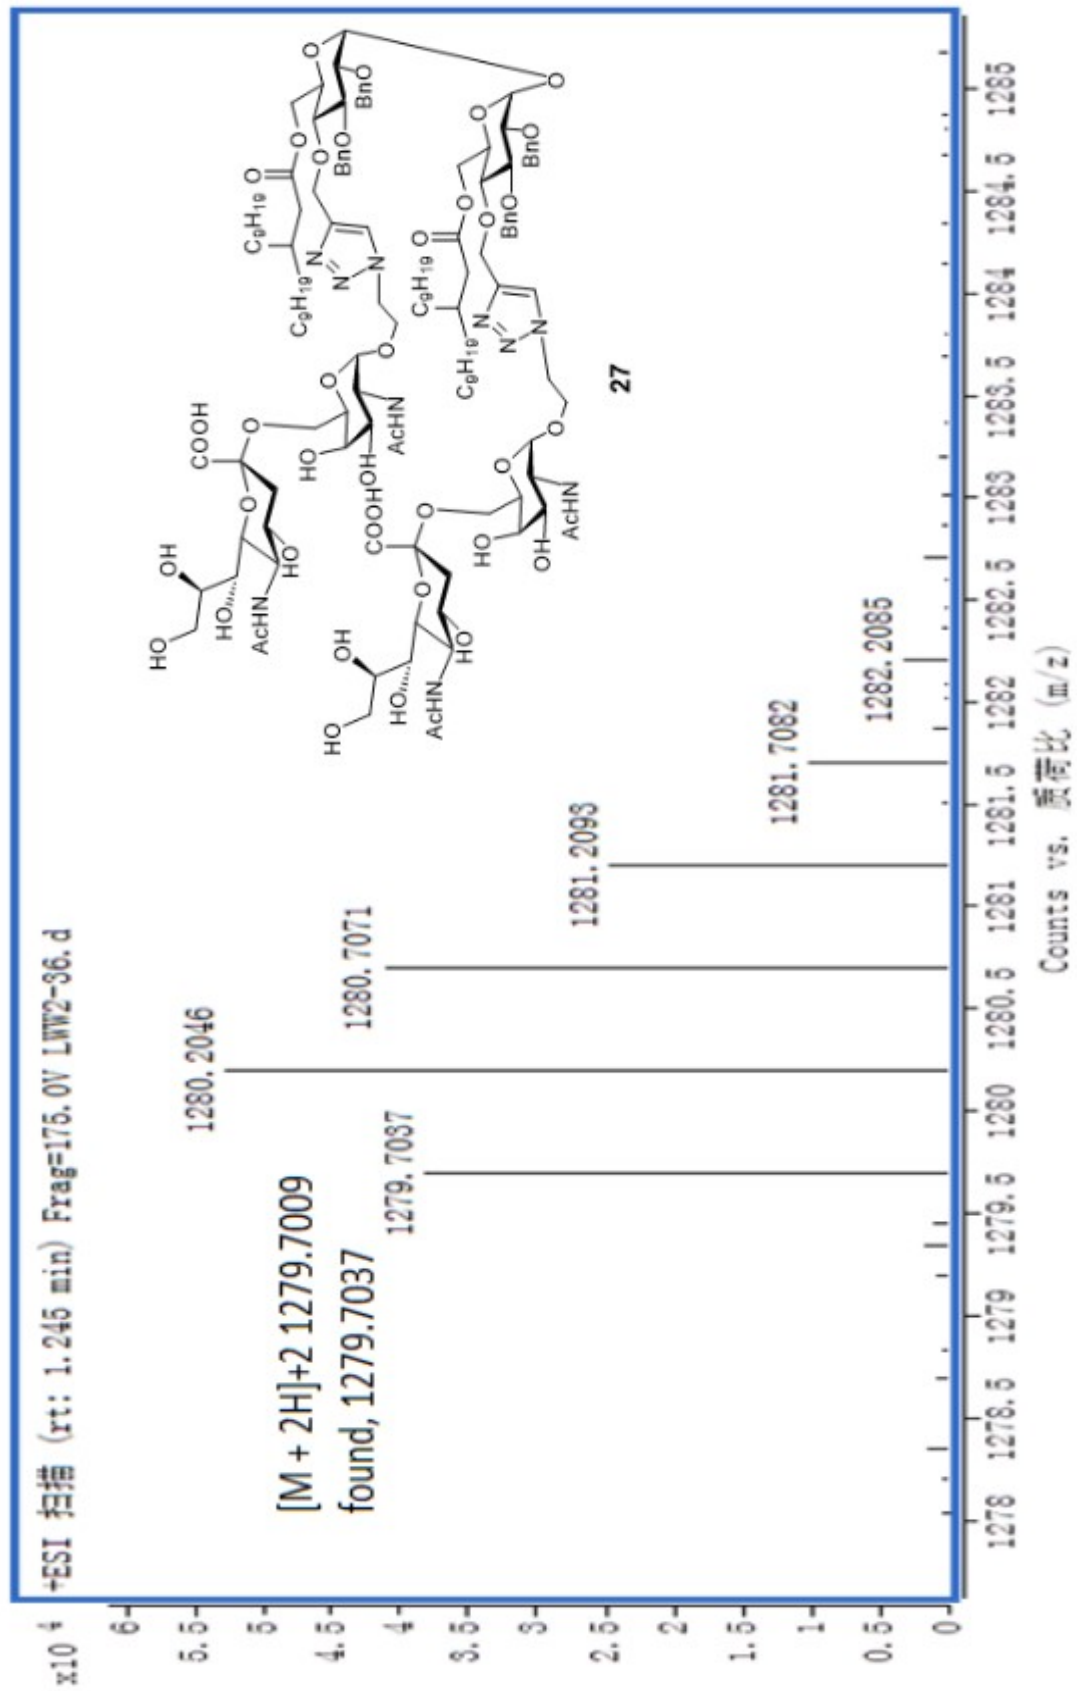

HR-ESI-MS spectrum of conjugate 27

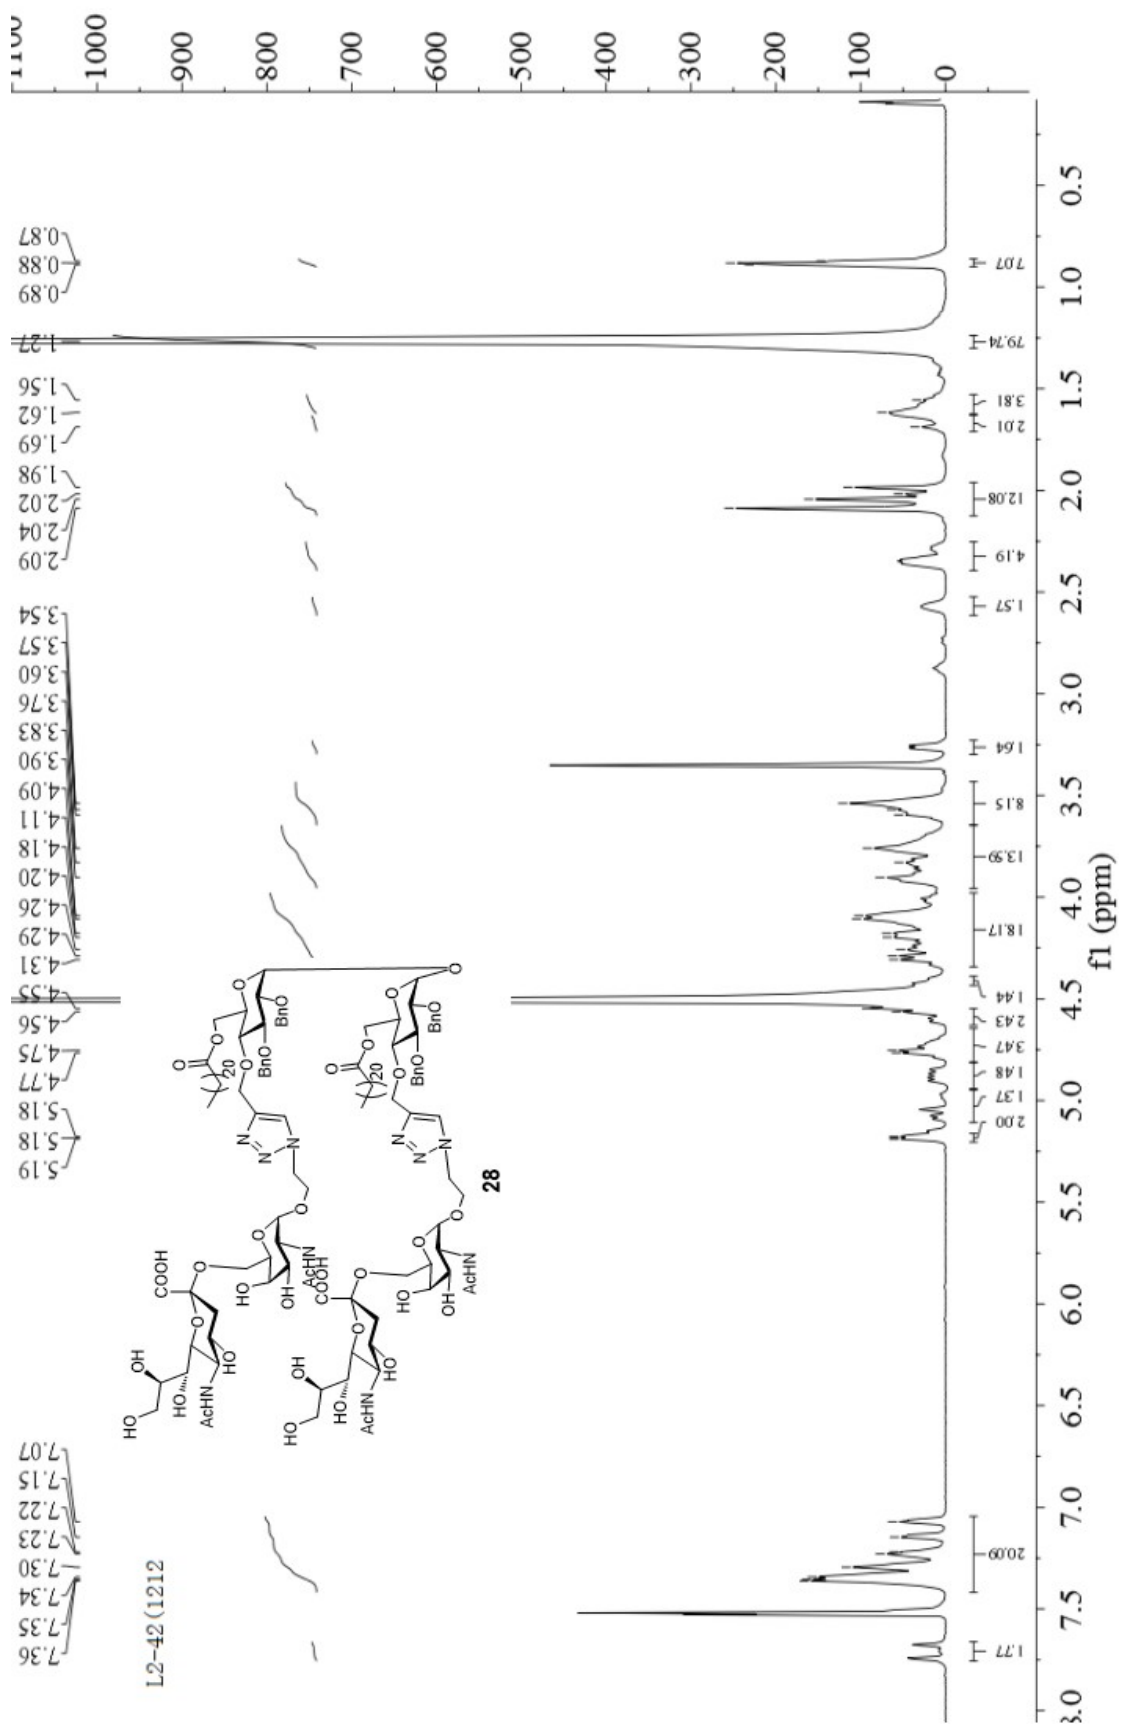

<sup>1</sup>H NMR Spectrum of compound **28** (MeOD: CDCl<sub>3</sub> = 1:6; 400 MHz)

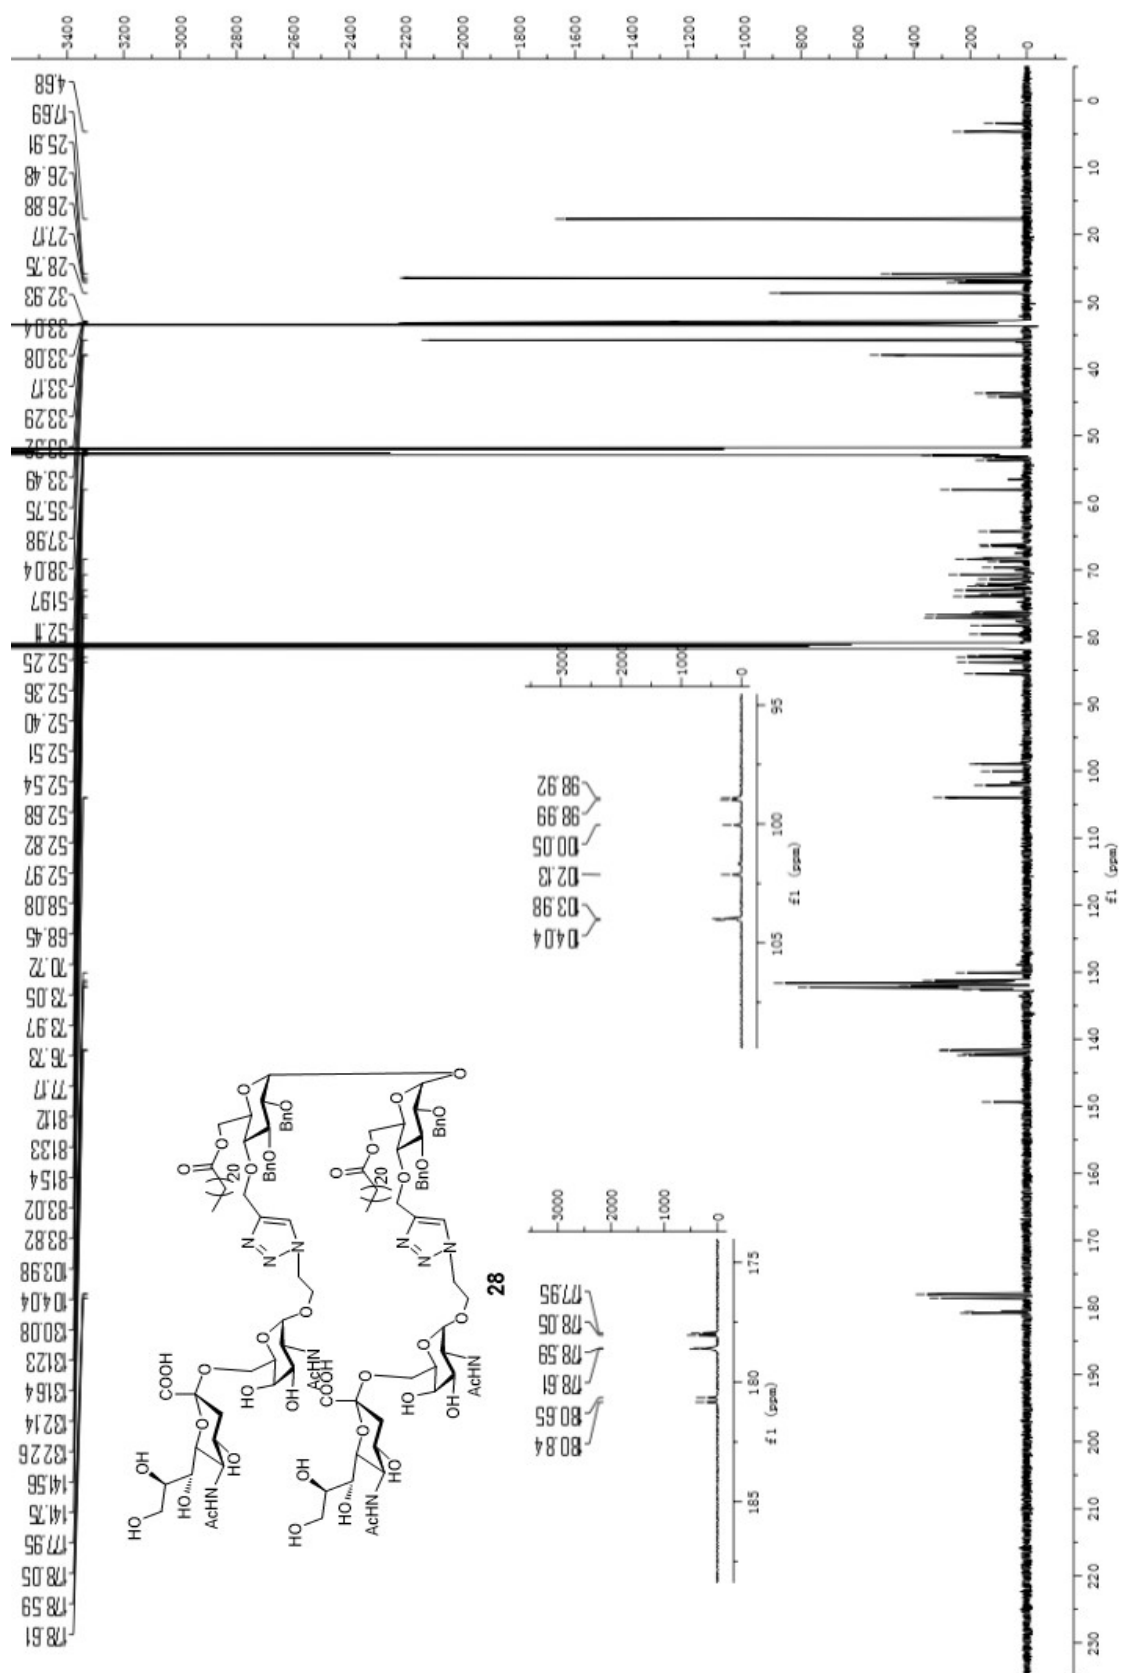

<sup>13</sup>C NMR Spectrum of compound **28** (MeOD: CDCl<sub>3</sub> = 1:6; 400 MHz)

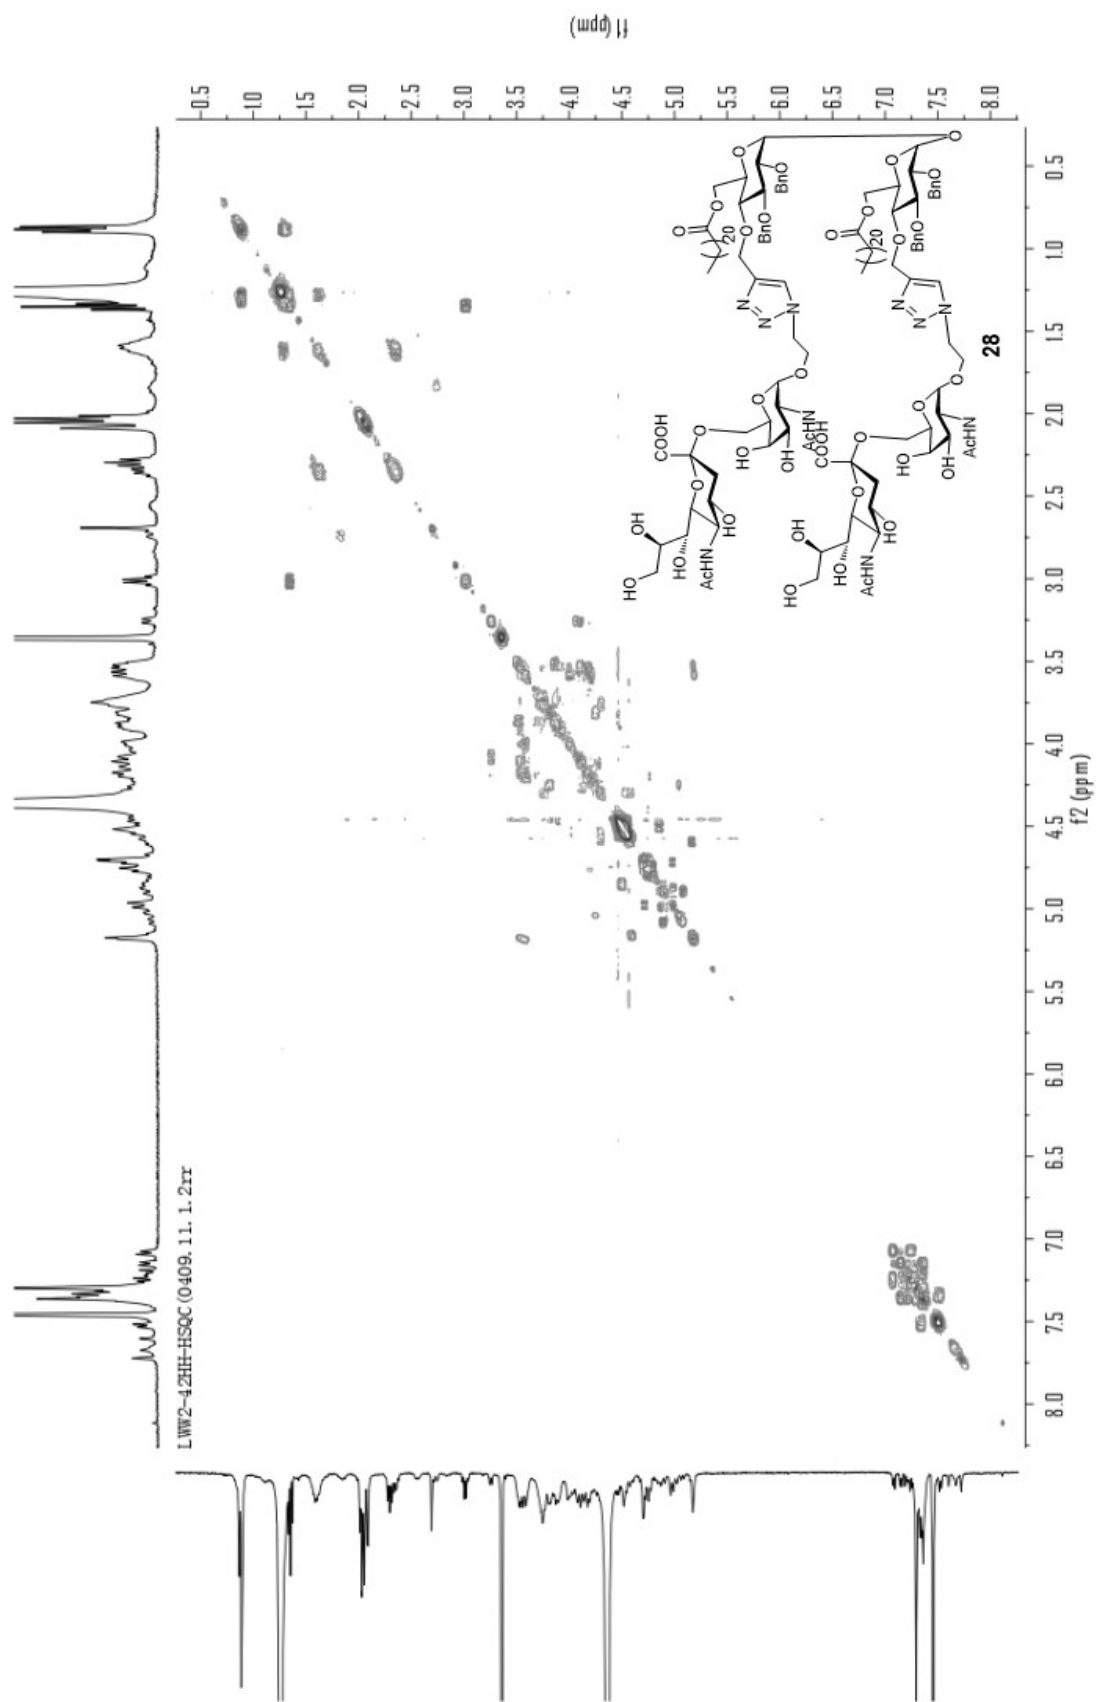

$^1\text{H}$ - $^1\text{H}$  COSY NMR Spectrum of compound **28** (MeOD:  $\text{CDCl}_3 = 1:6$ ; 400 MHz)

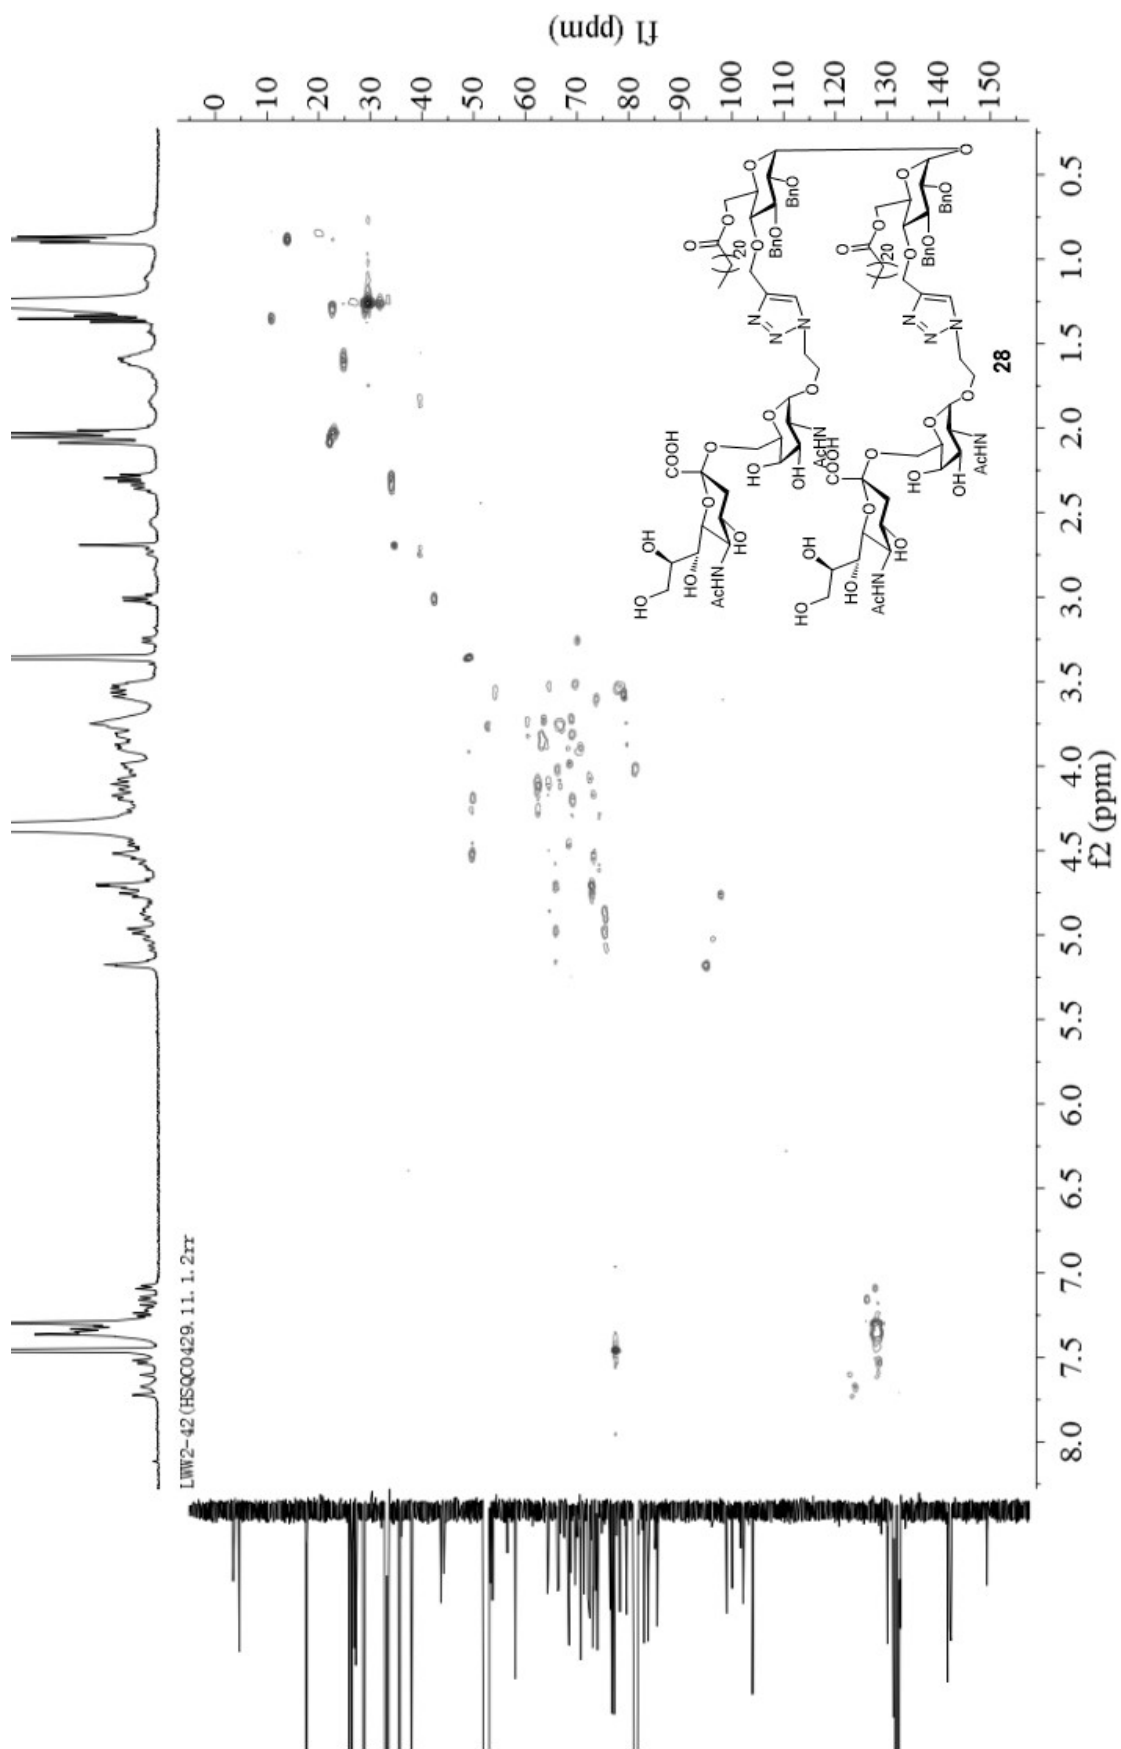

HSQC NMR Spectrum of compound **28** (MeOD: CDCl<sub>3</sub> = 1:6; 400 MHz)



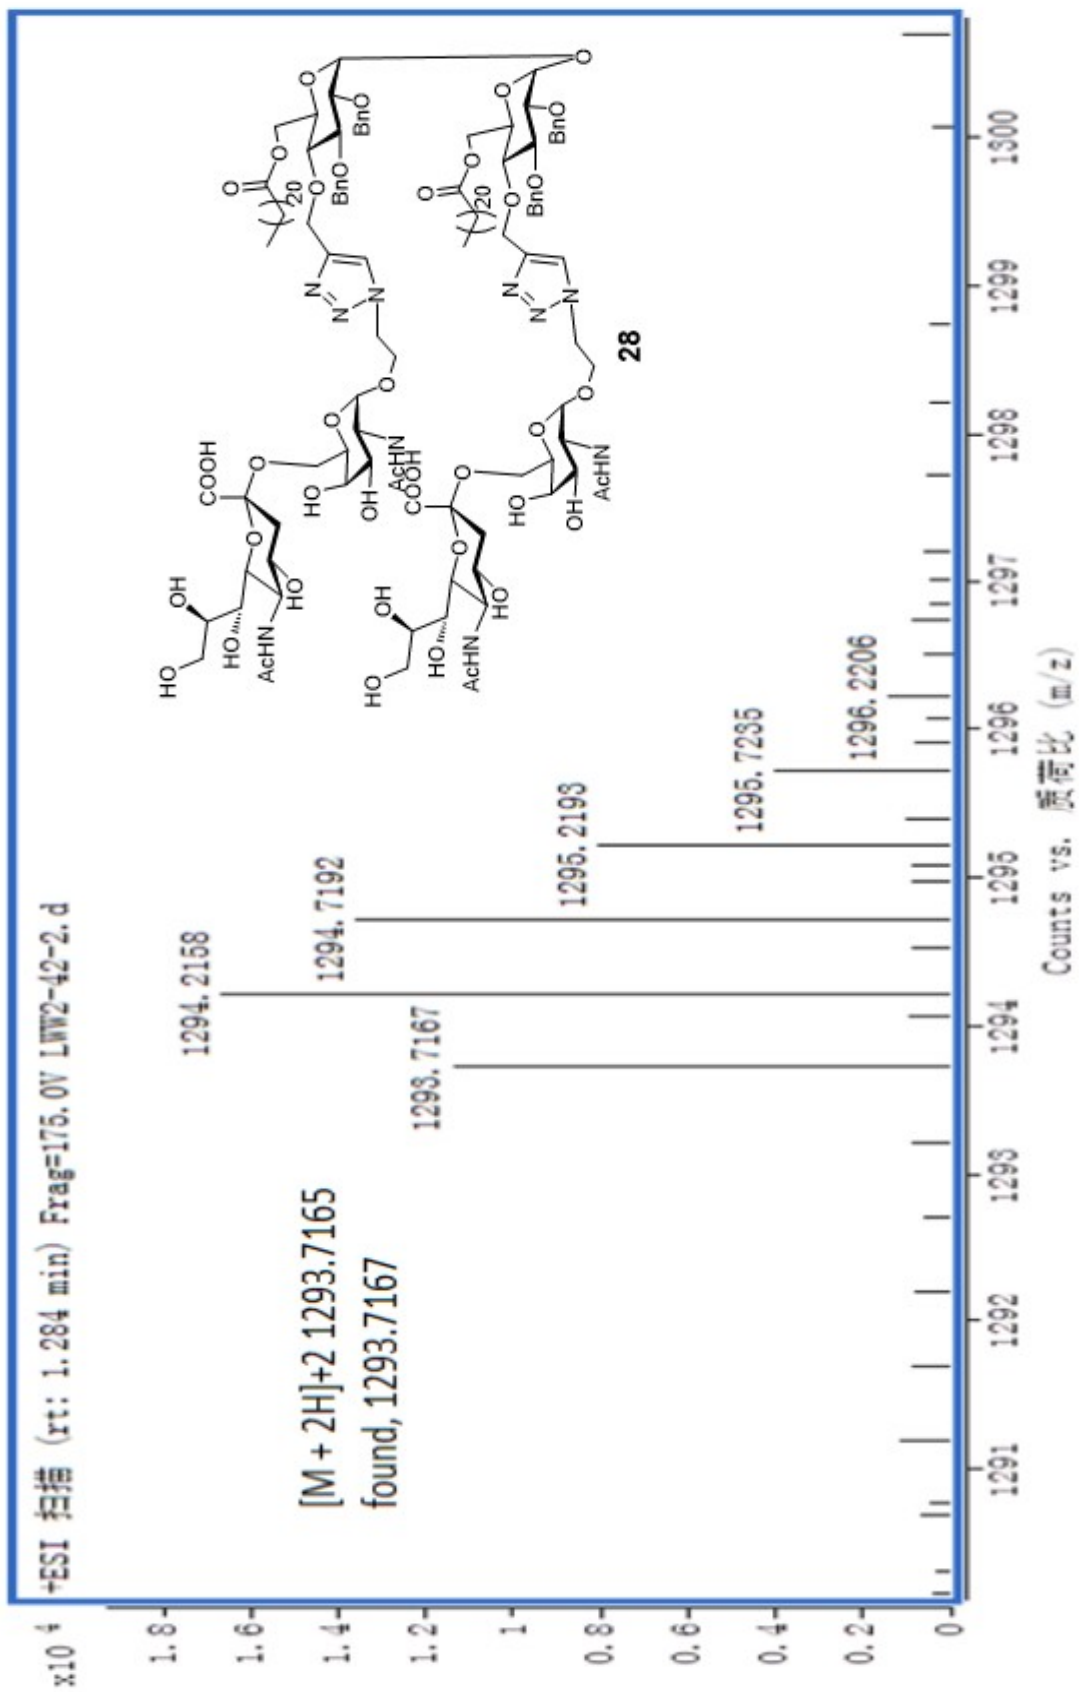

HR-ESI-MS spectrum of conjugate **28**

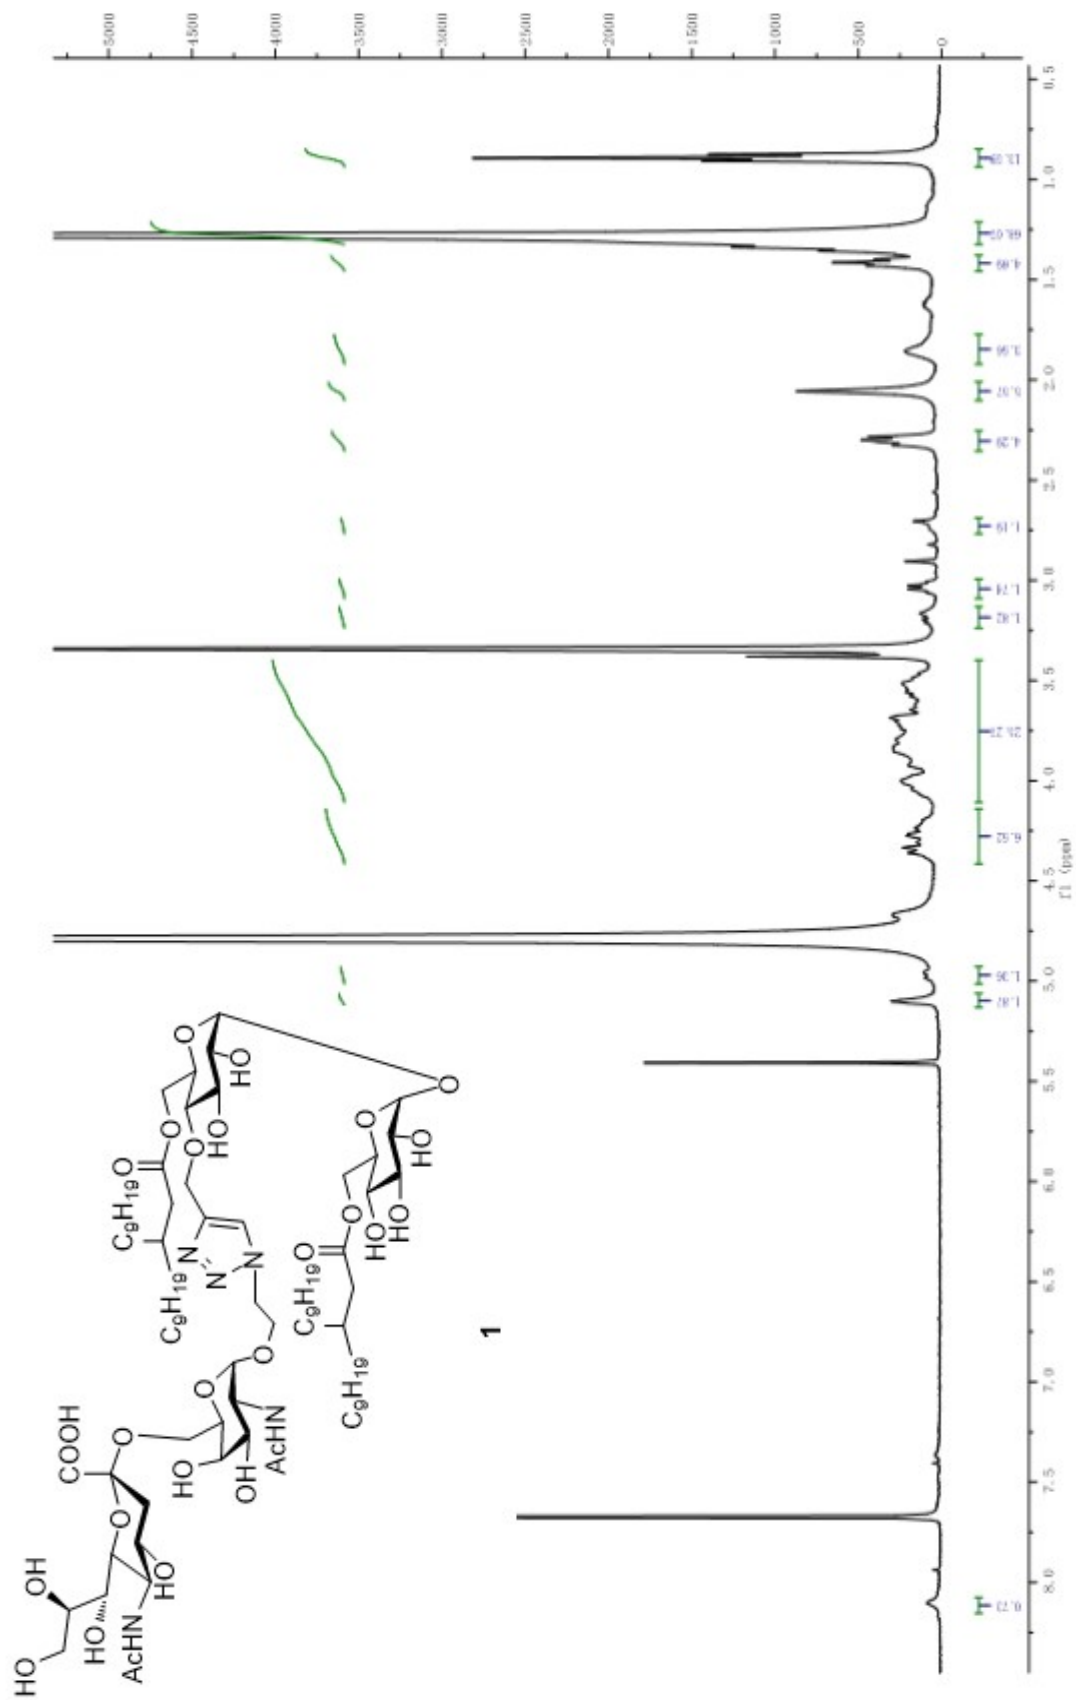

<sup>1</sup>H NMR Spectrum of compound **1** (CD<sub>3</sub>OD-CDCl<sub>3</sub>=1 : 4, 400 MHz)

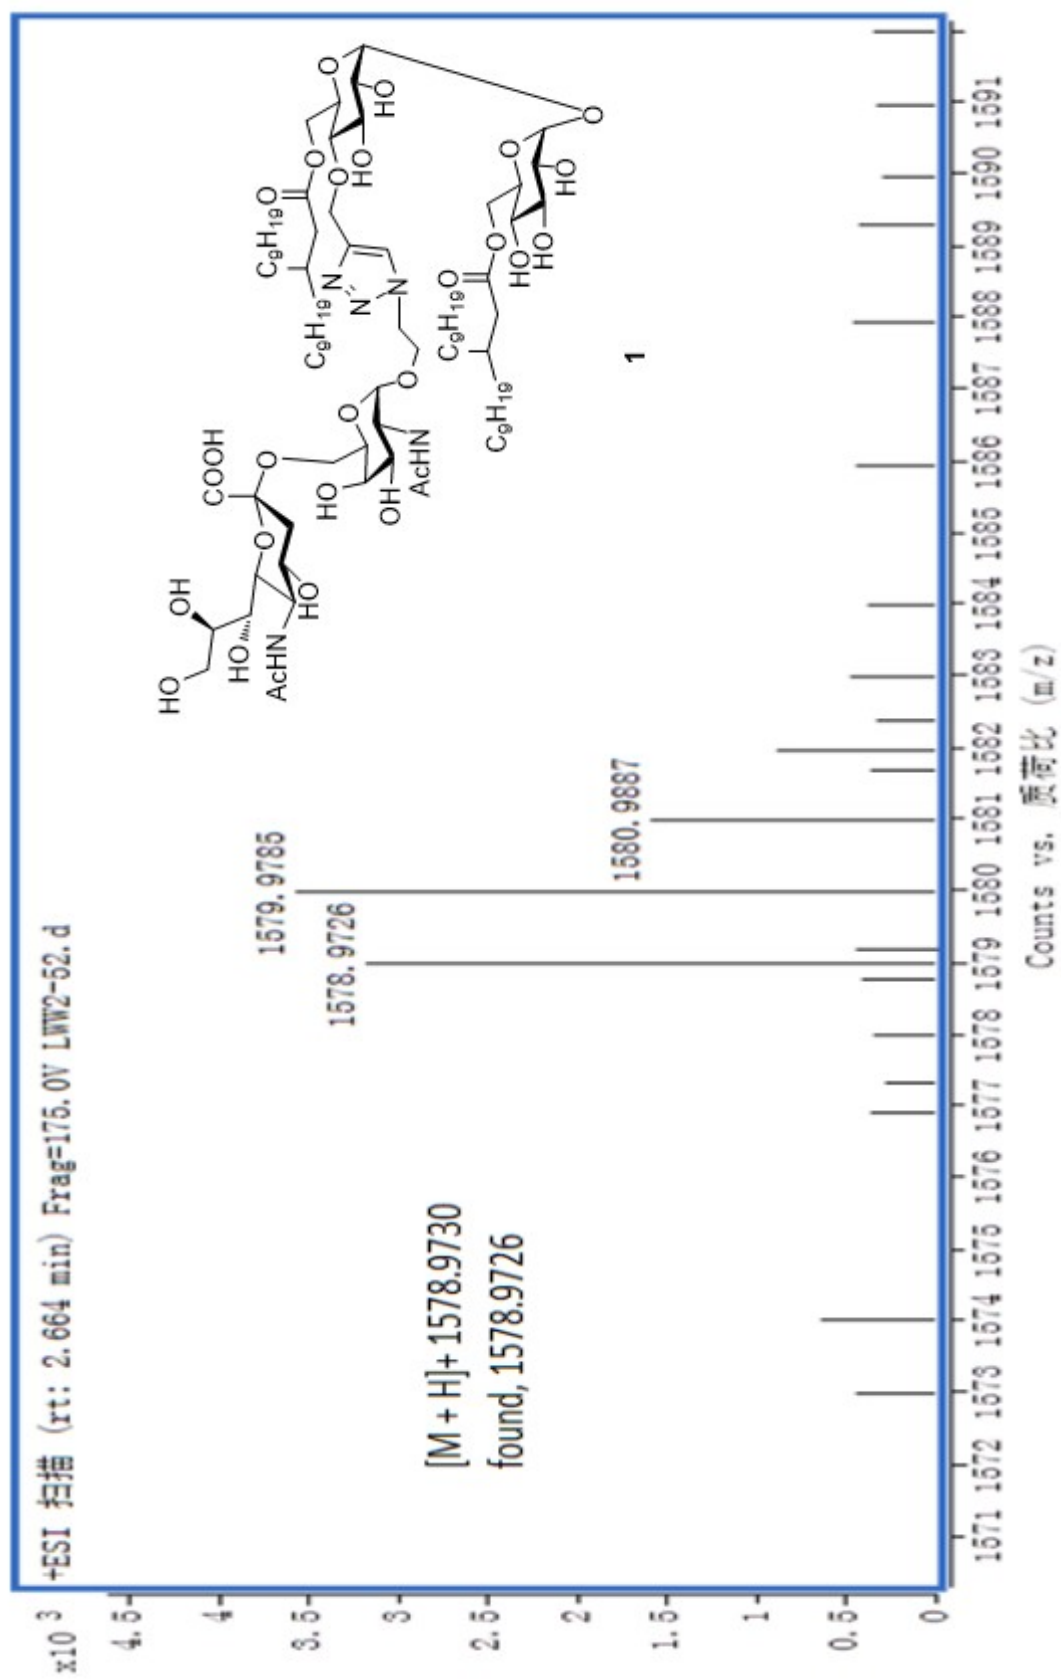

HR-ESI-MS spectrum of conjugate 1

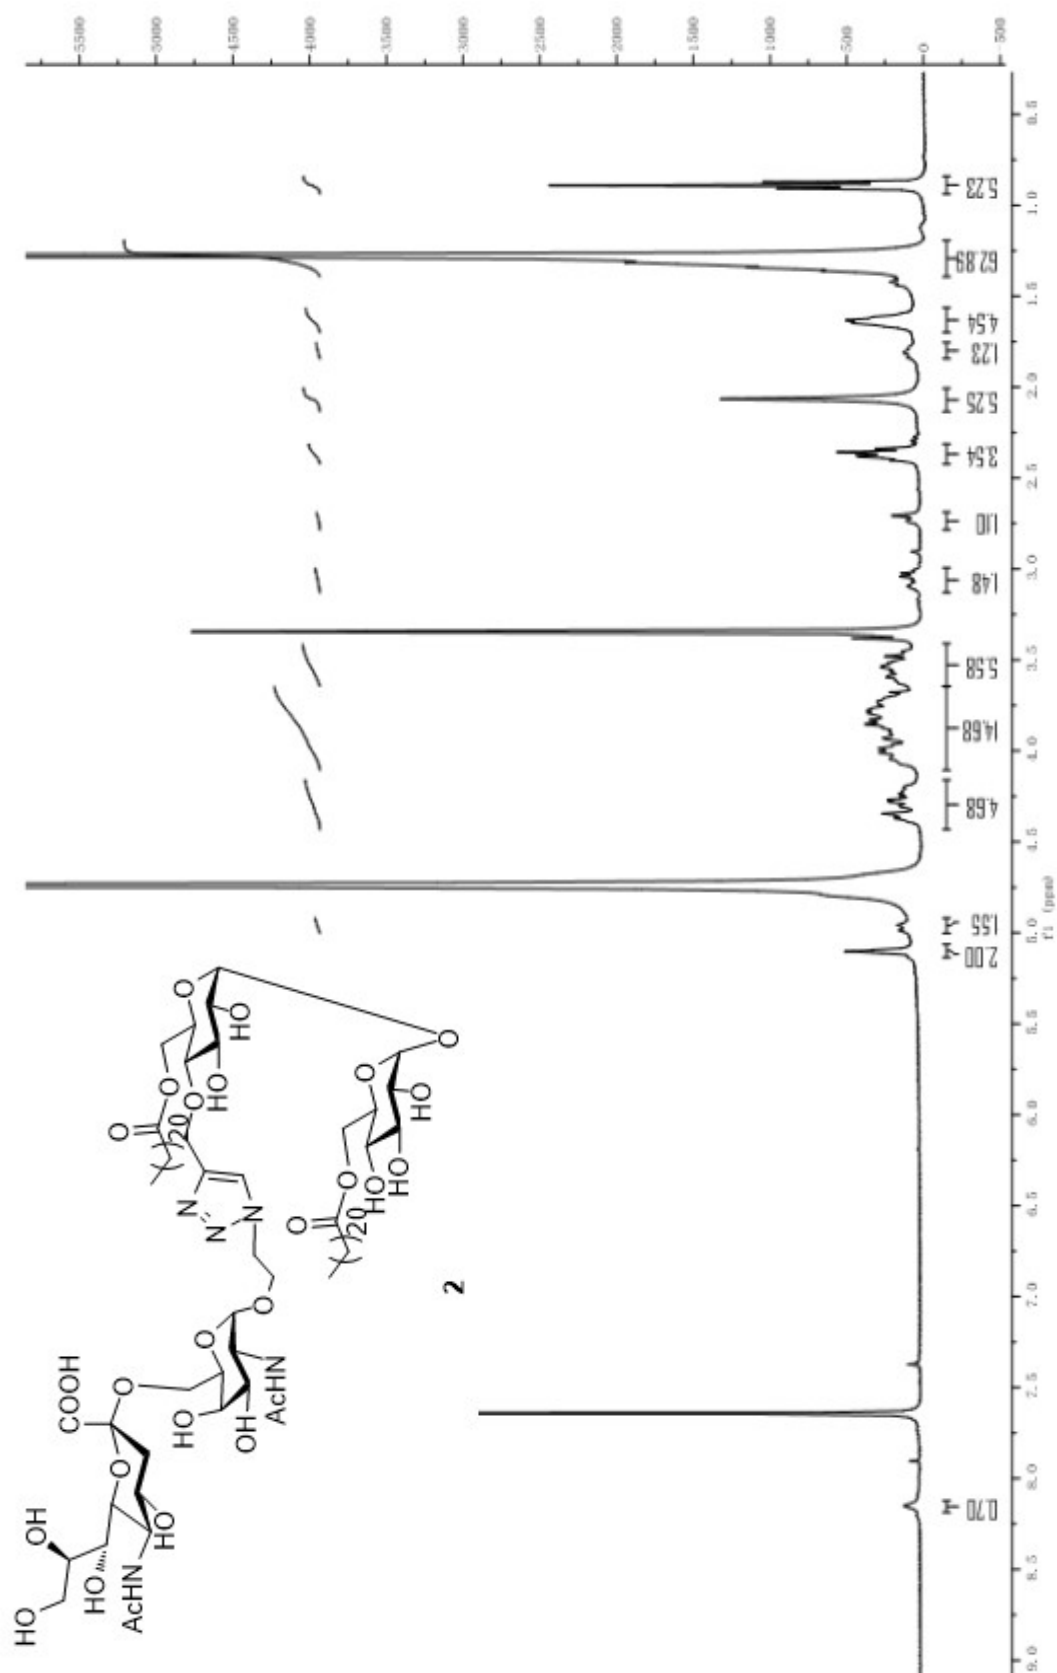

<sup>1</sup>H NMR Spectrum of compound **2** (CD<sub>3</sub>OD-CDCl<sub>3</sub>=1 : 4, 400 MHz)

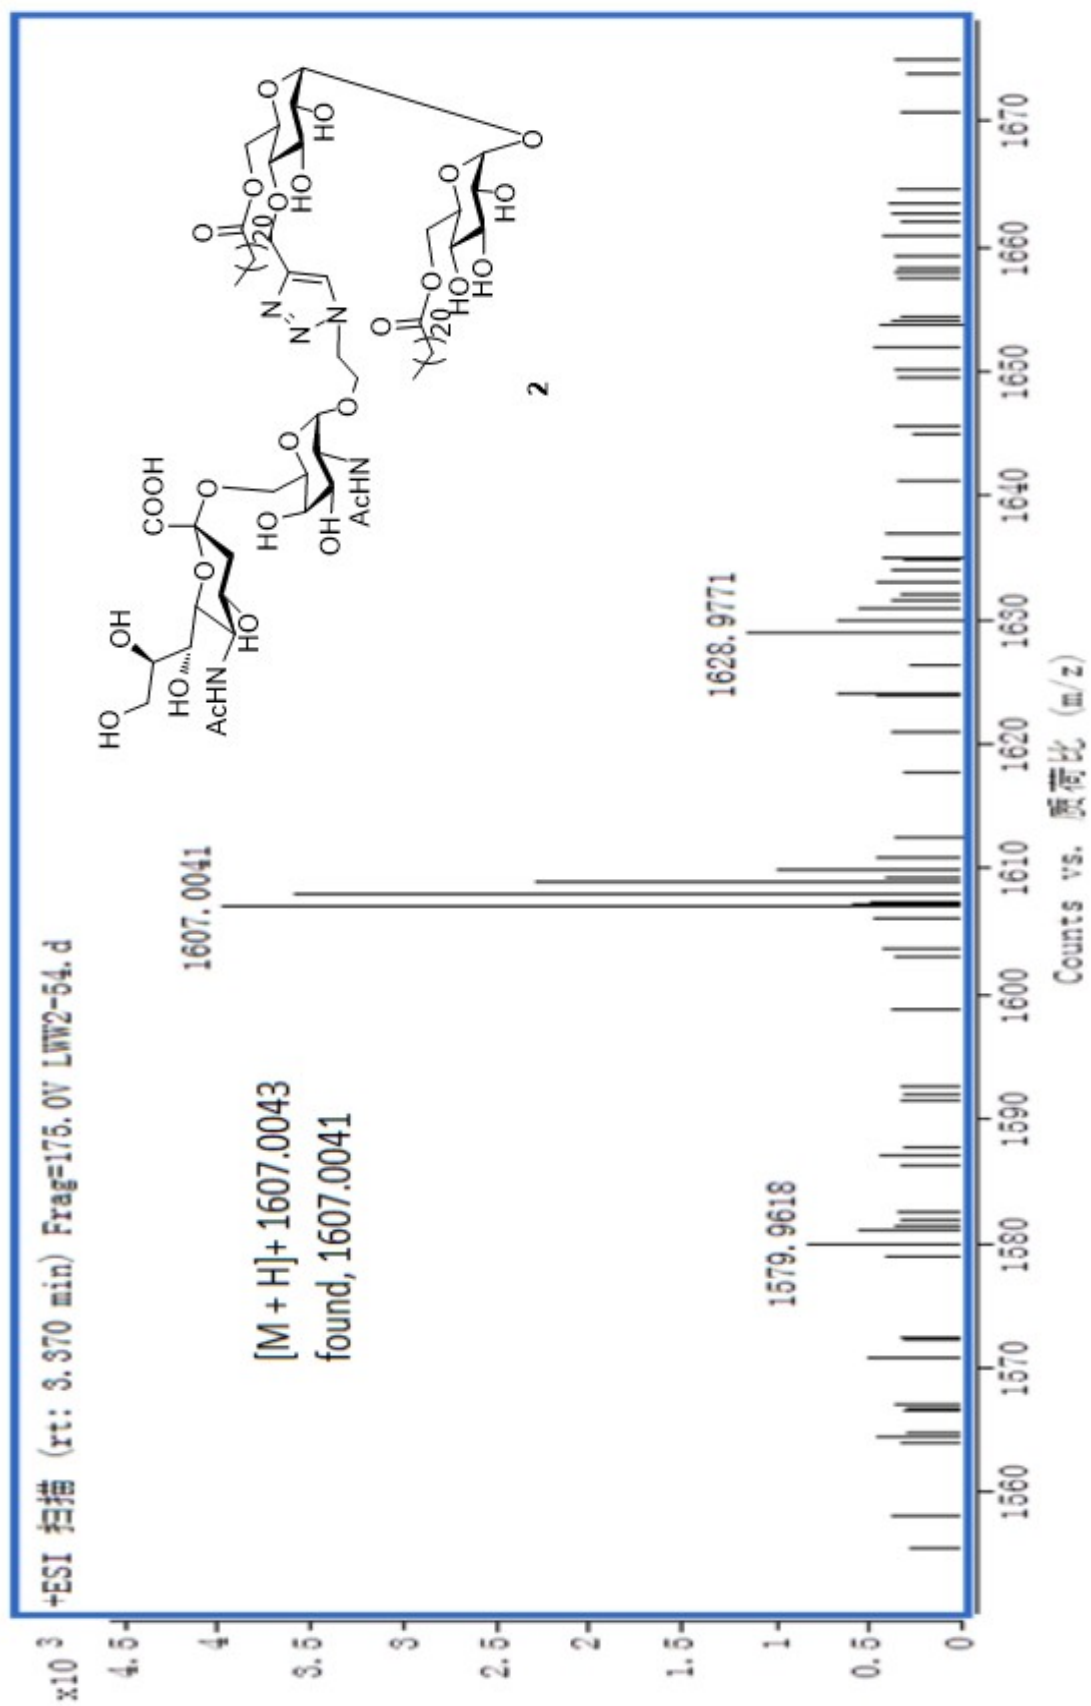

HR-ESI-MS spectrum of conjugate 2

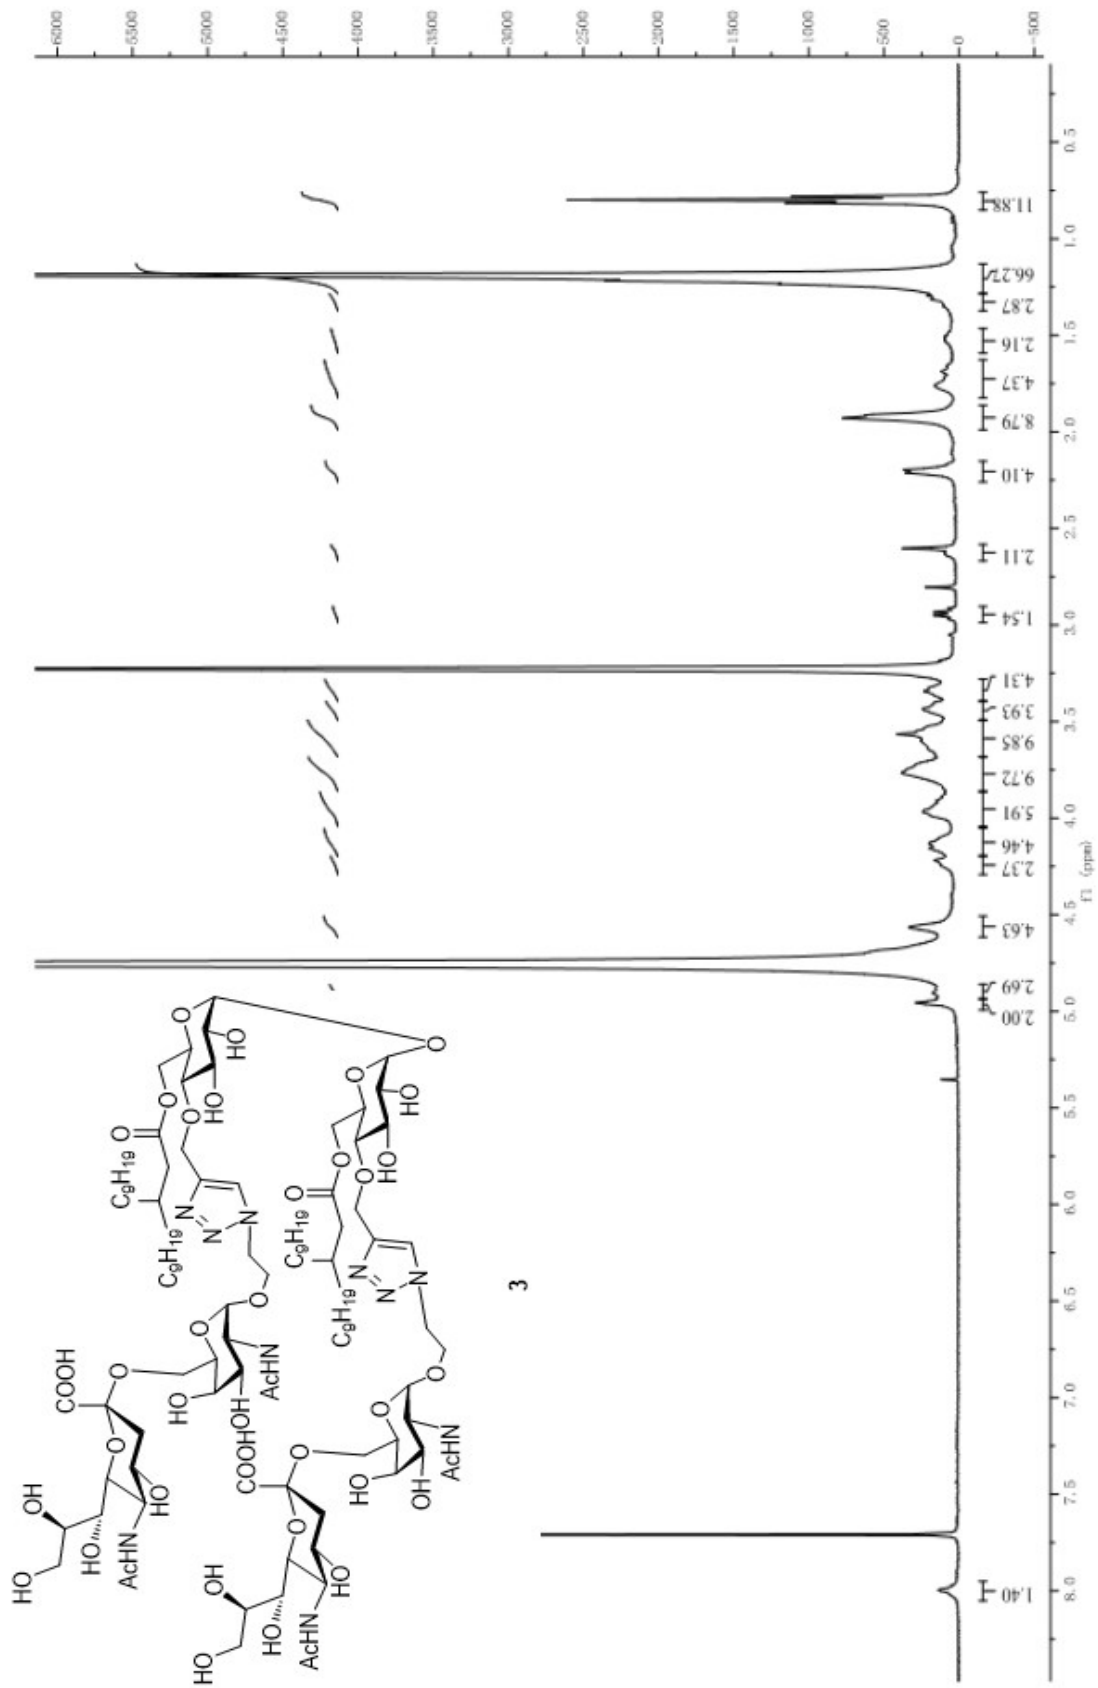

$^1\text{H}$  NMR Spectrum of compound **3** ( $\text{CD}_3\text{OD}-\text{CDCl}_3=1 : 4$ , 400 MHz)

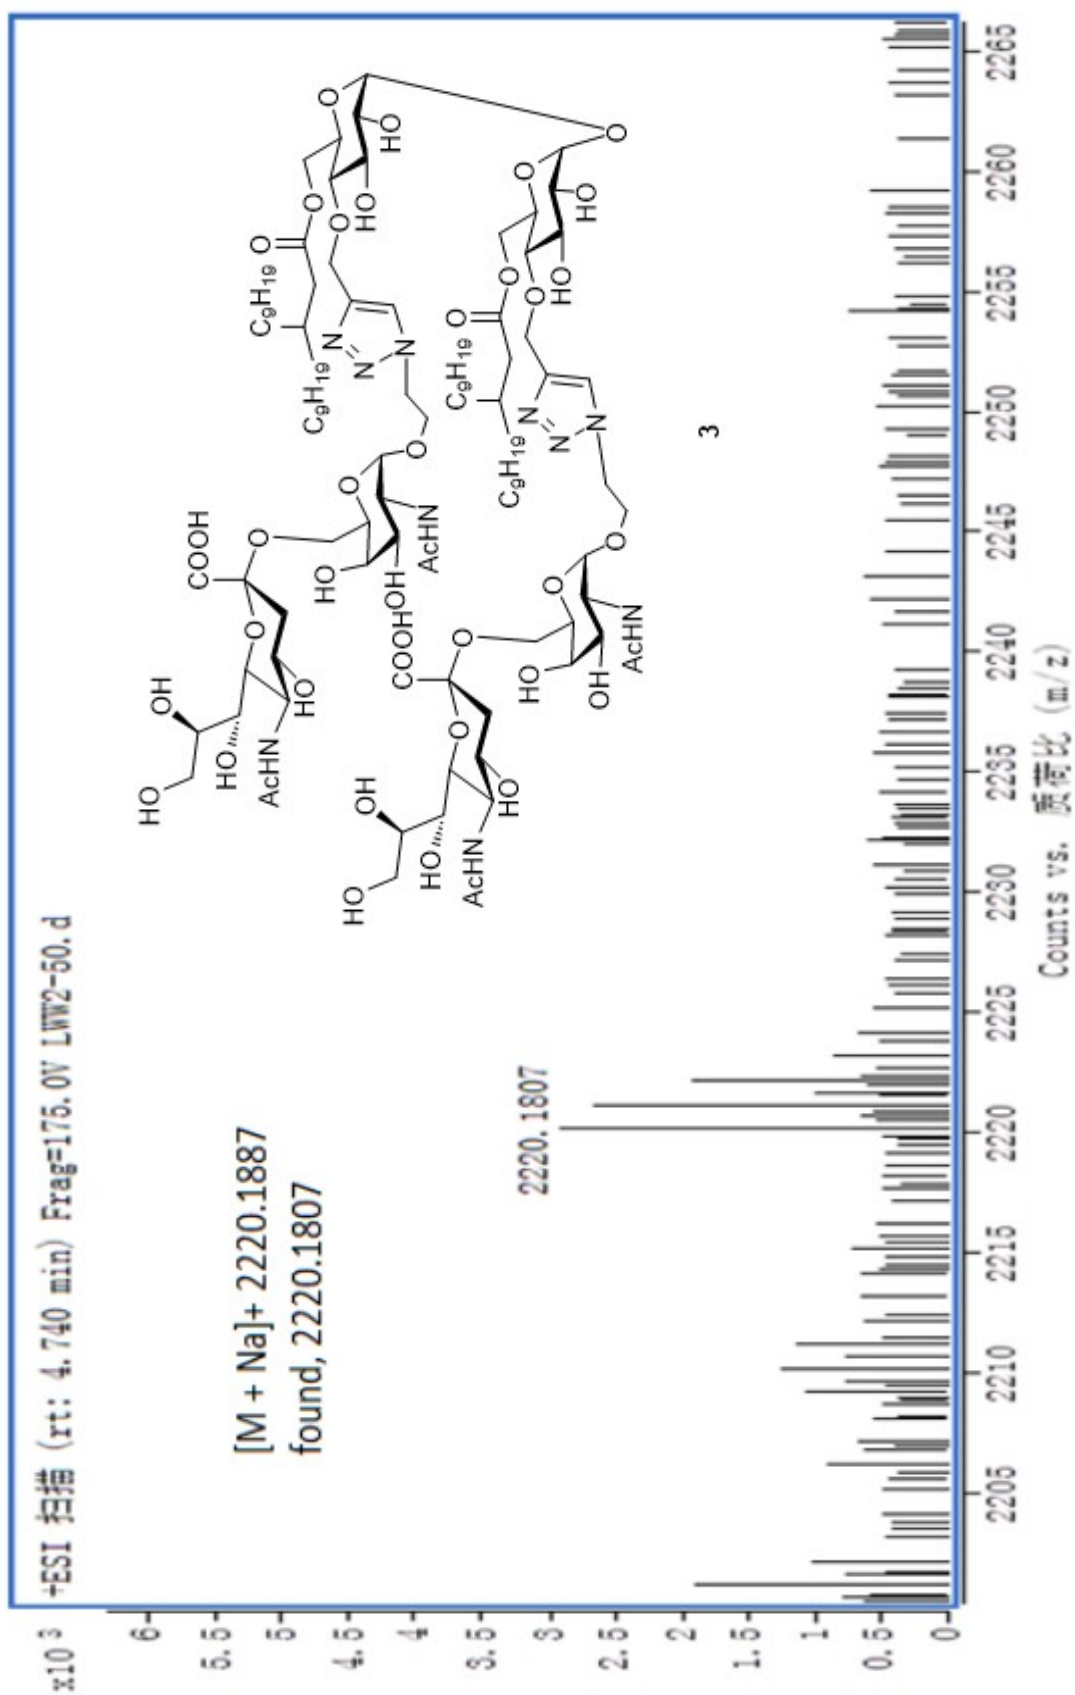

HR-ESI-MS spectrum of conjugate 3

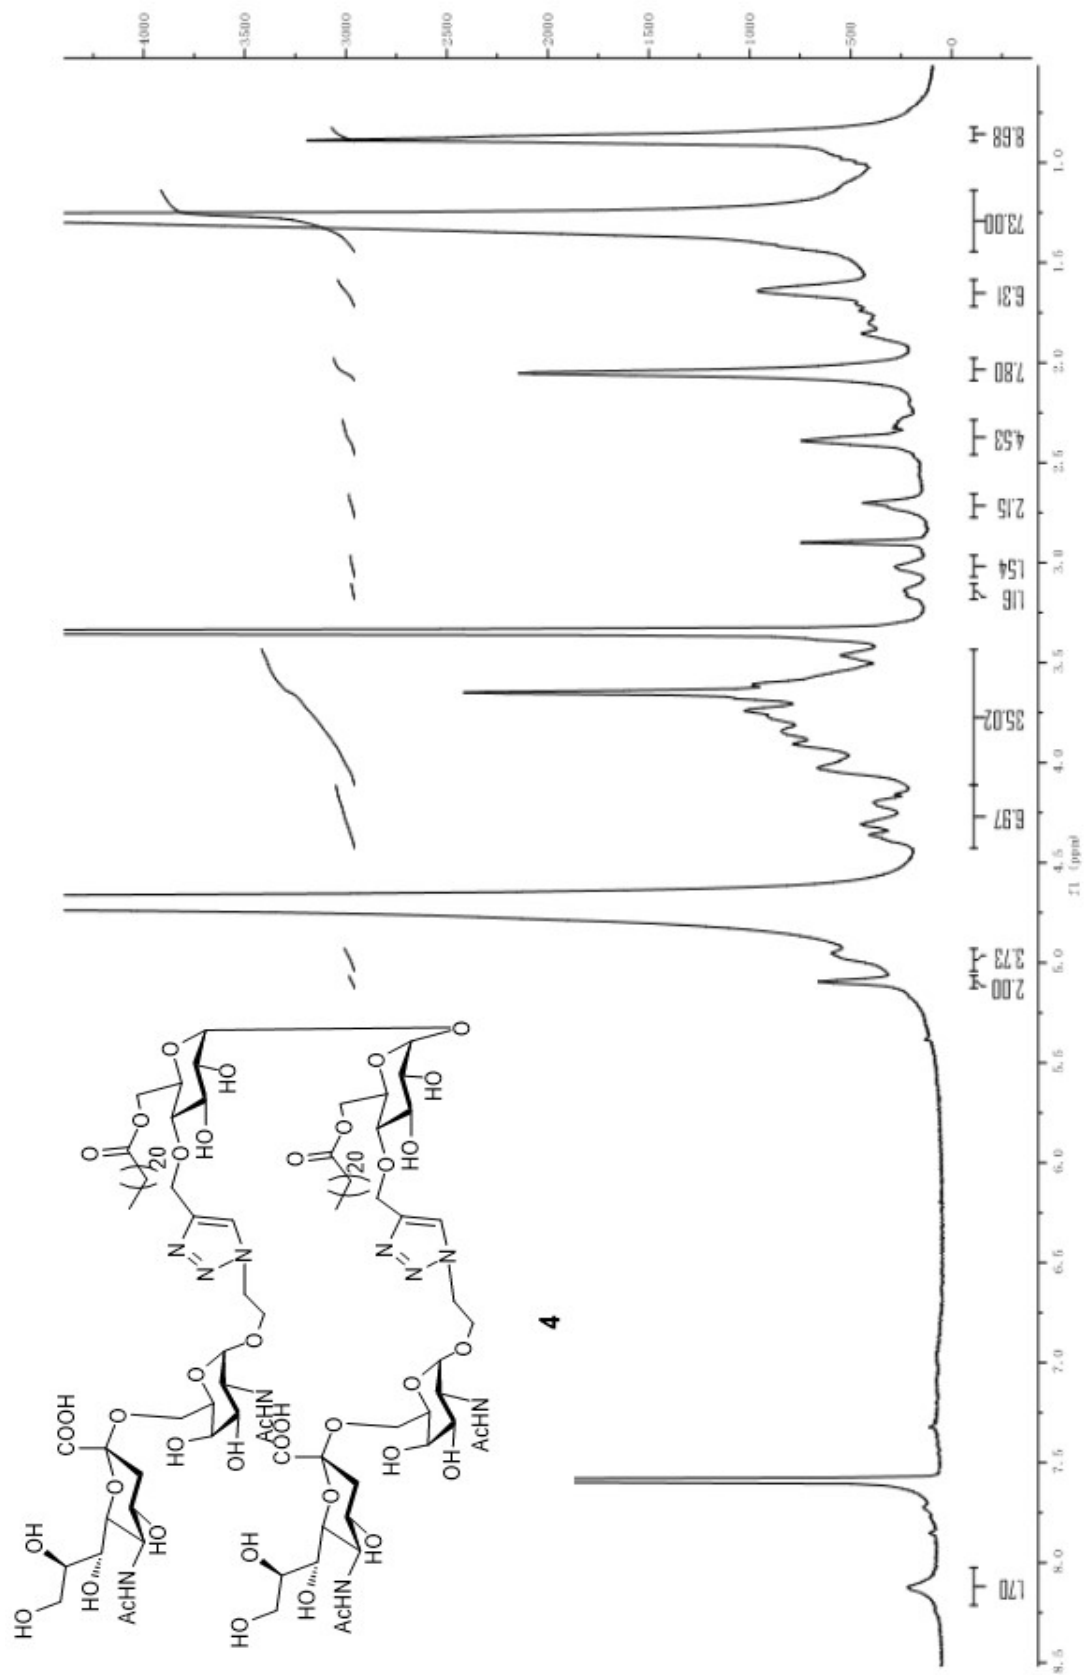

<sup>1</sup>H NMR Spectrum of compound **4** (CD<sub>3</sub>OD-CDCl<sub>3</sub>=1 : 4, 400 MHz)



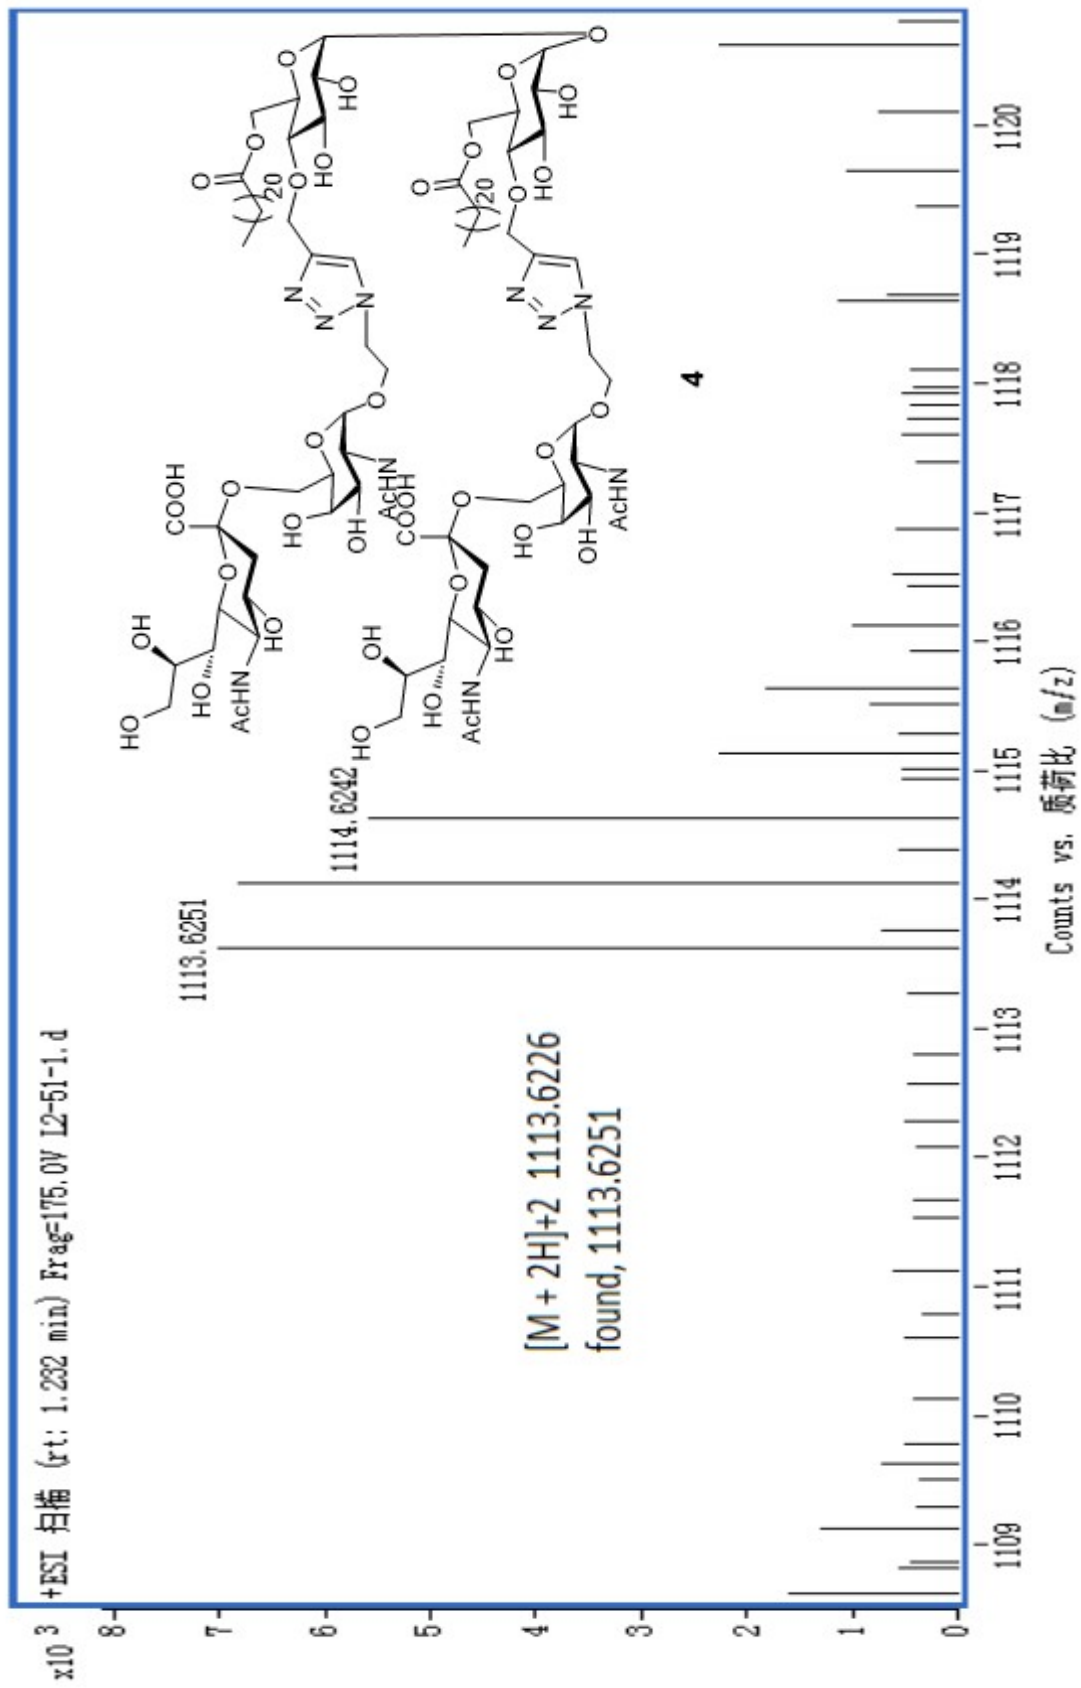

HR-ESI-MS spectrum of conjugate 4

$^1\text{H}$  NMR Spectrum of compound **S20** ( $\text{CDCl}_3$ , 400 MHz)

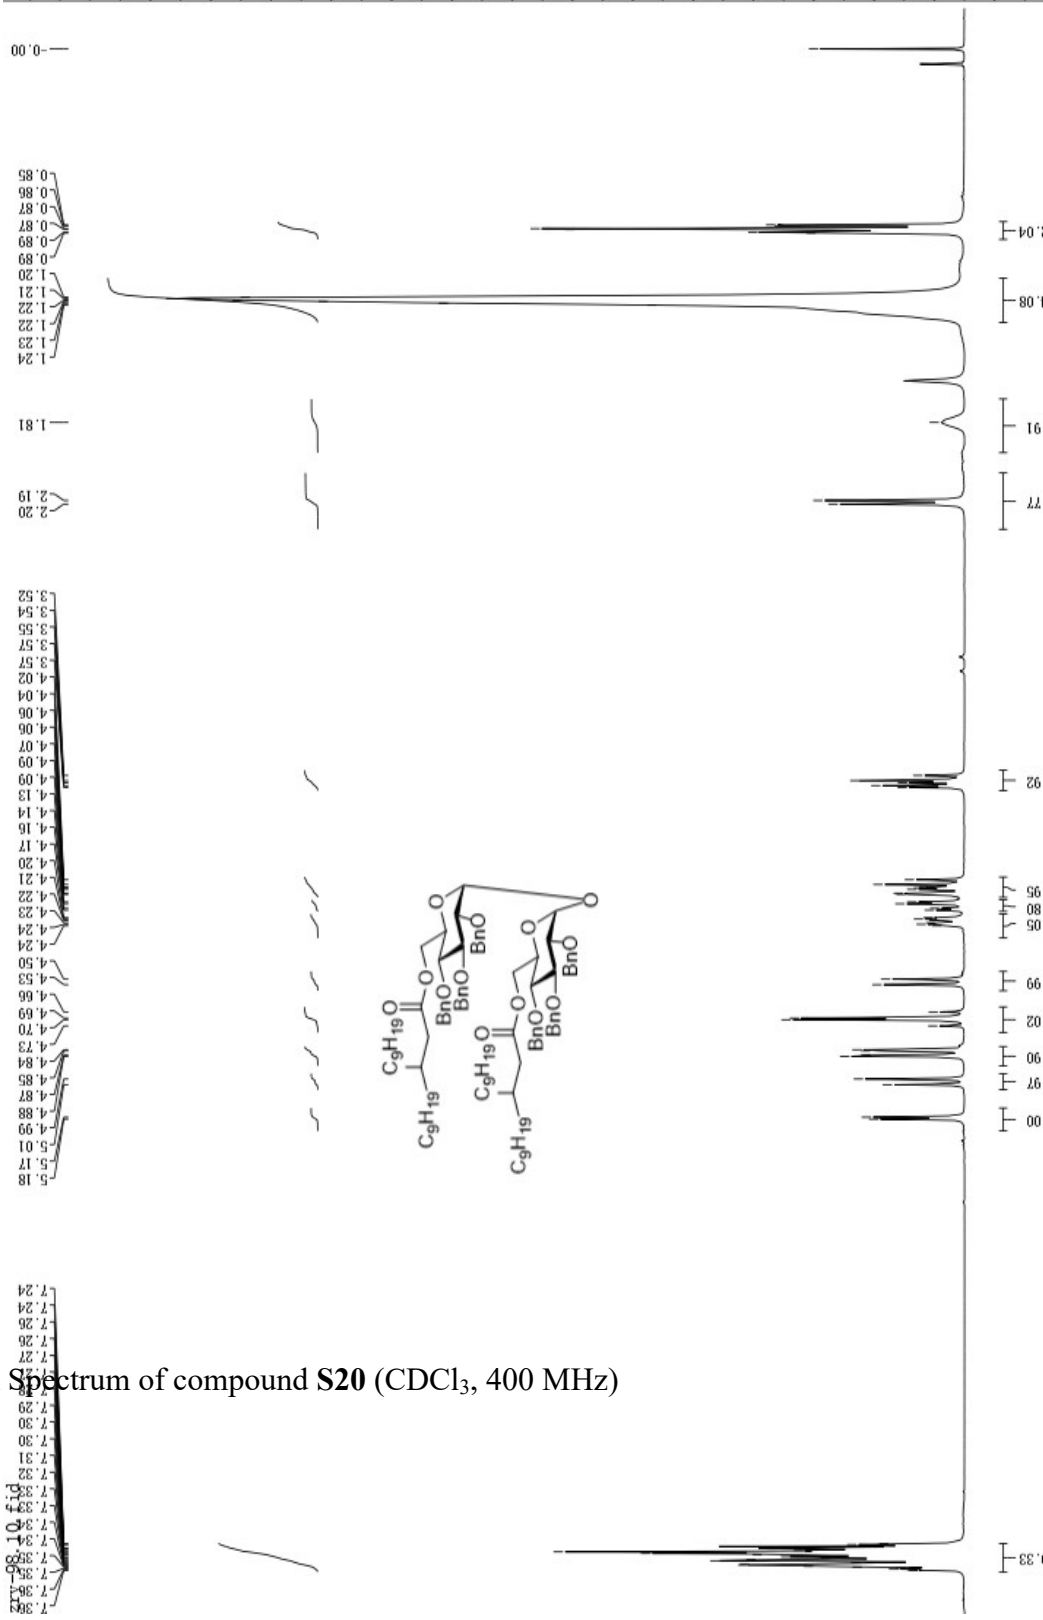

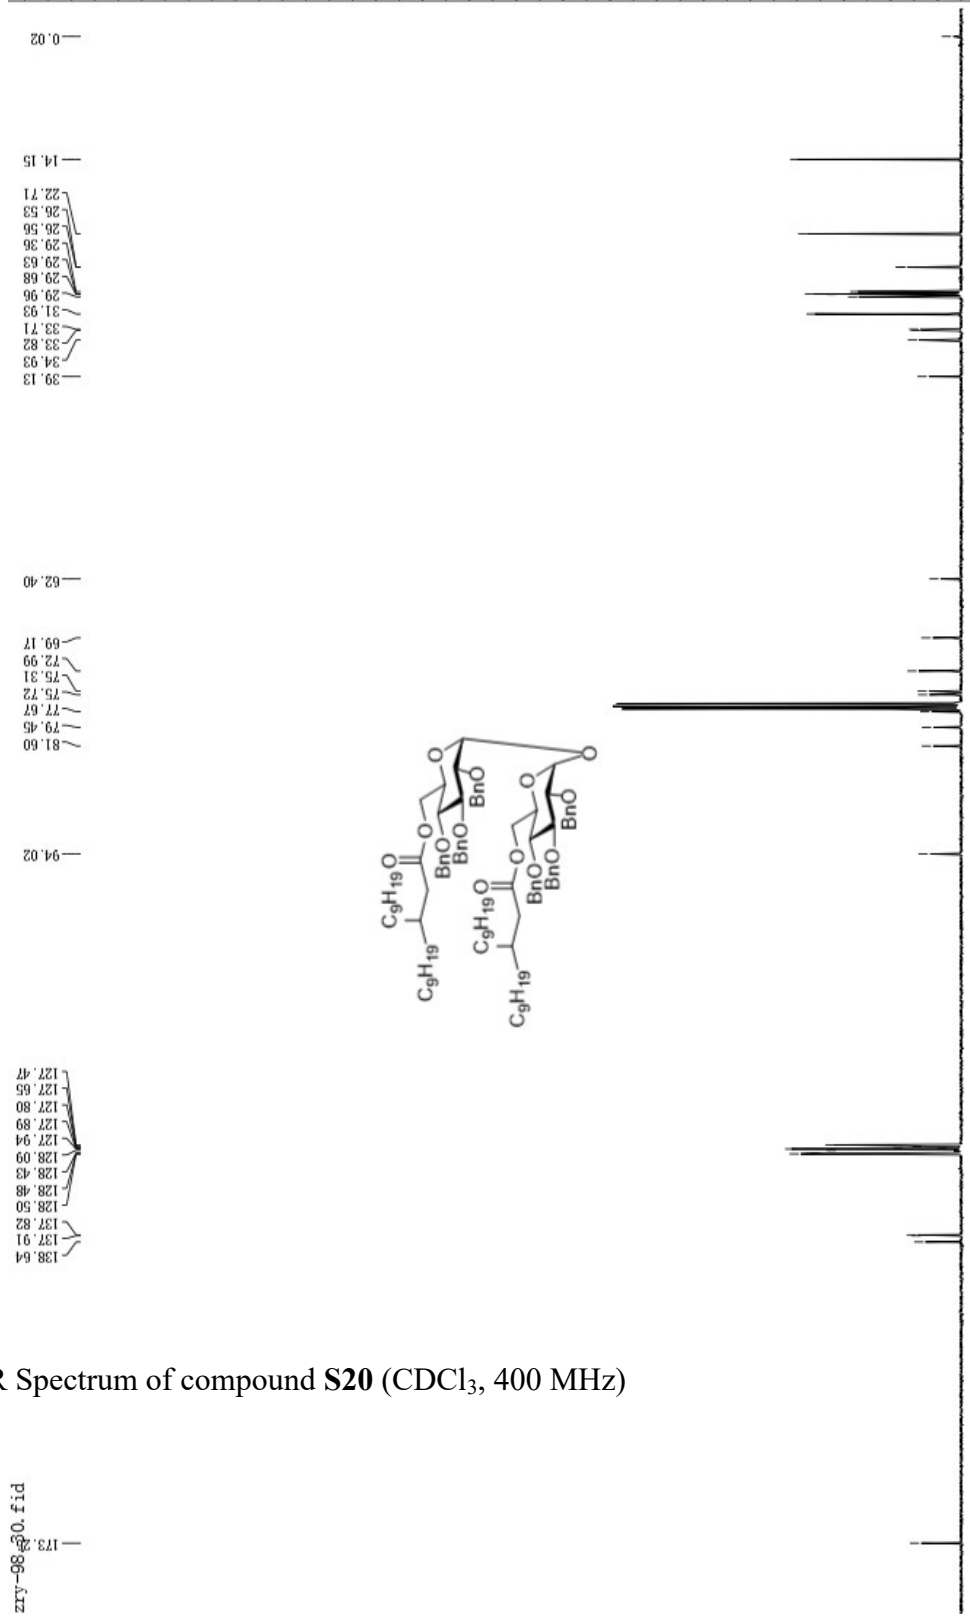

<sup>1</sup>H-<sup>1</sup>H COSY NMR Spectrum of compound **S20** (CDCl<sub>3</sub>, 400 MHz)

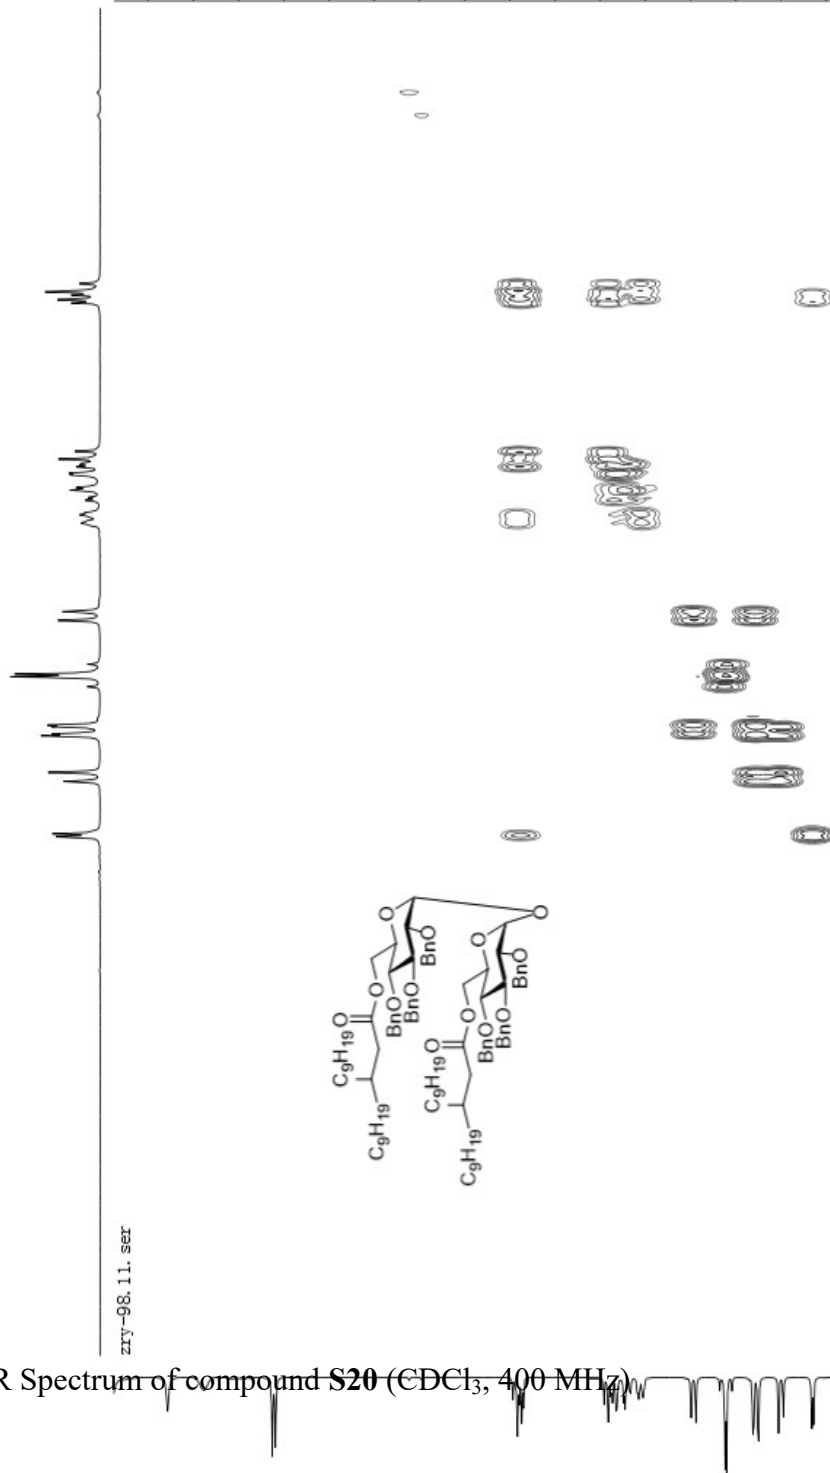

zxy-98.11.ser

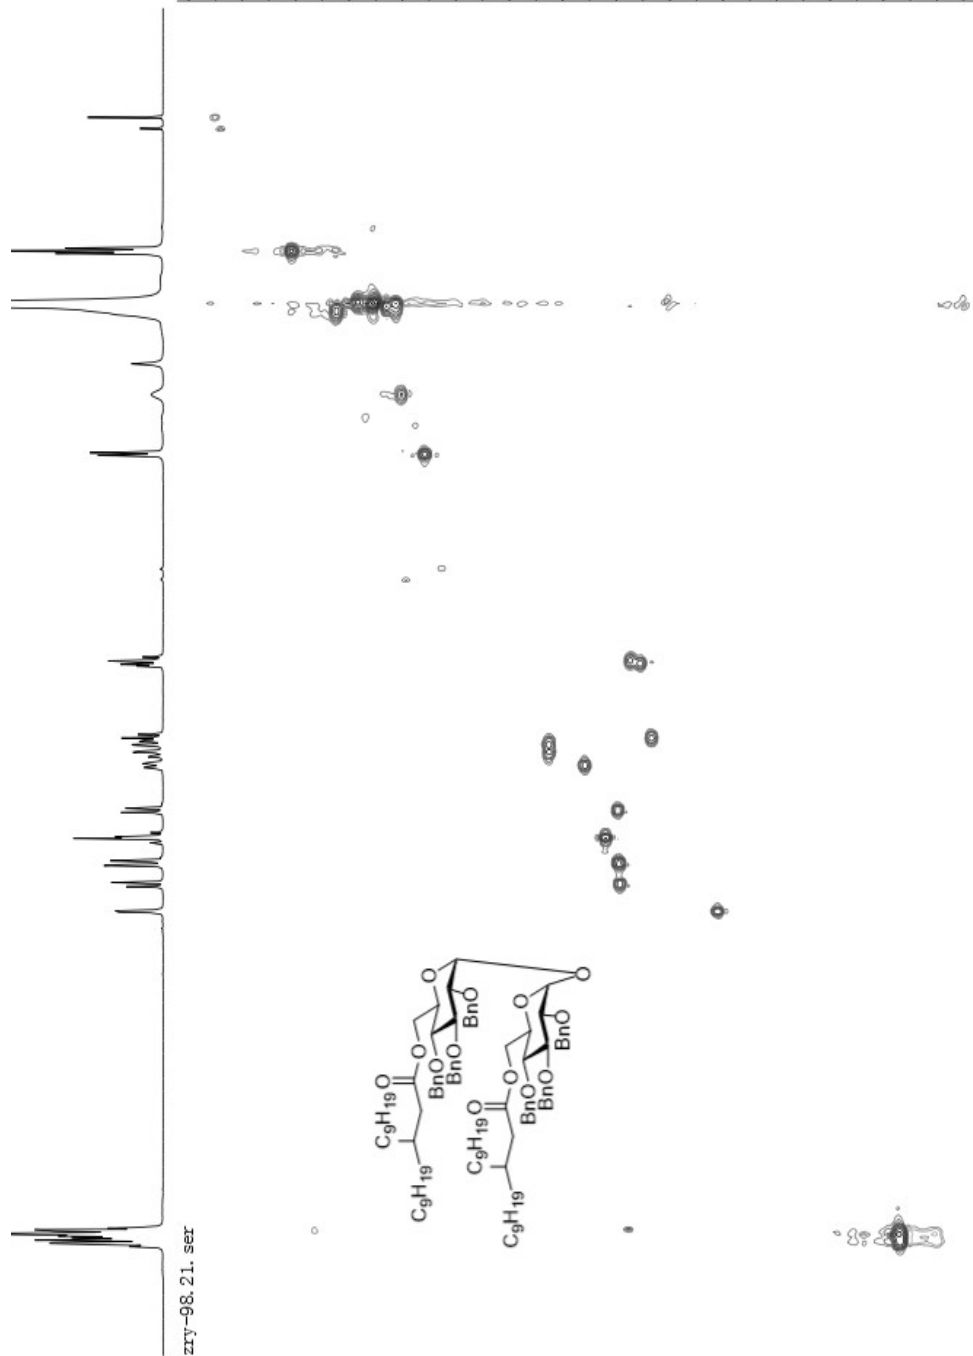

HSQC NMR Spectrum of compound S20 (CDCl<sub>3</sub>, 400 MHz)

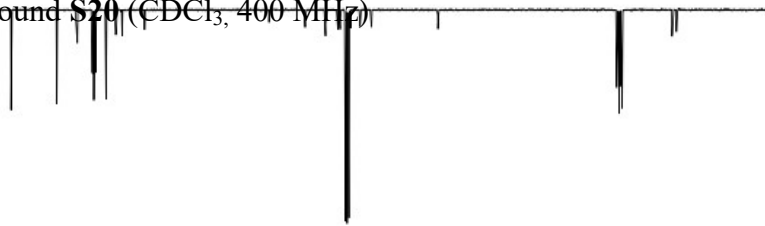

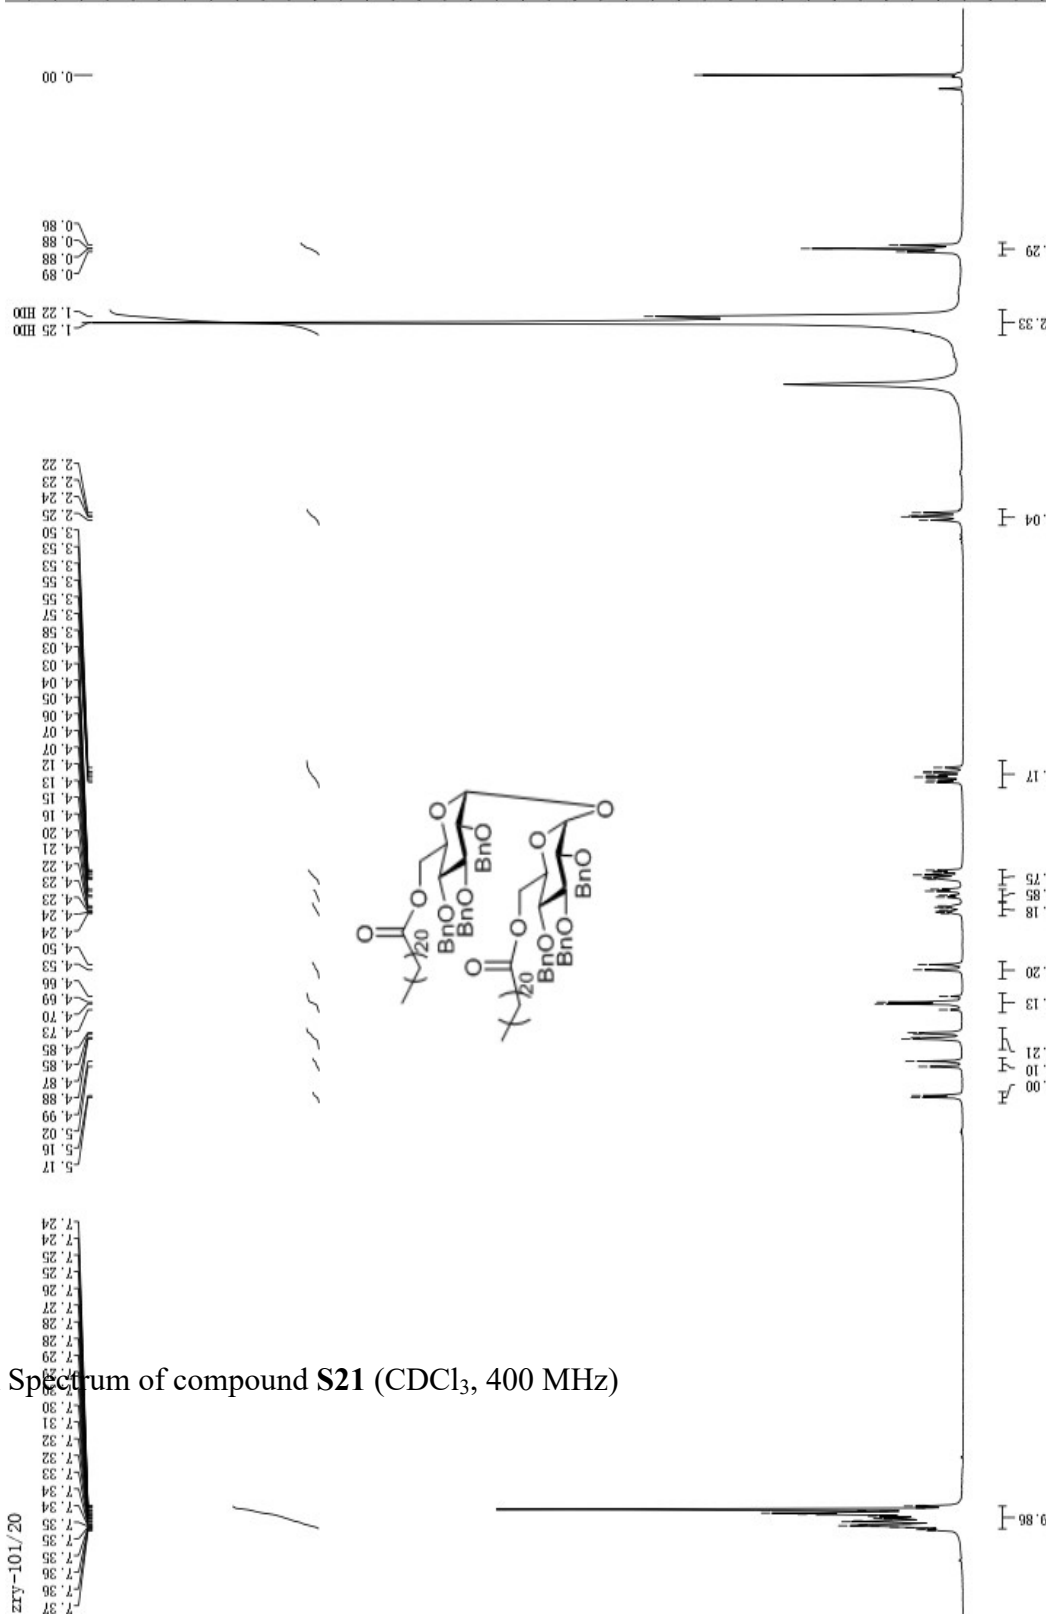

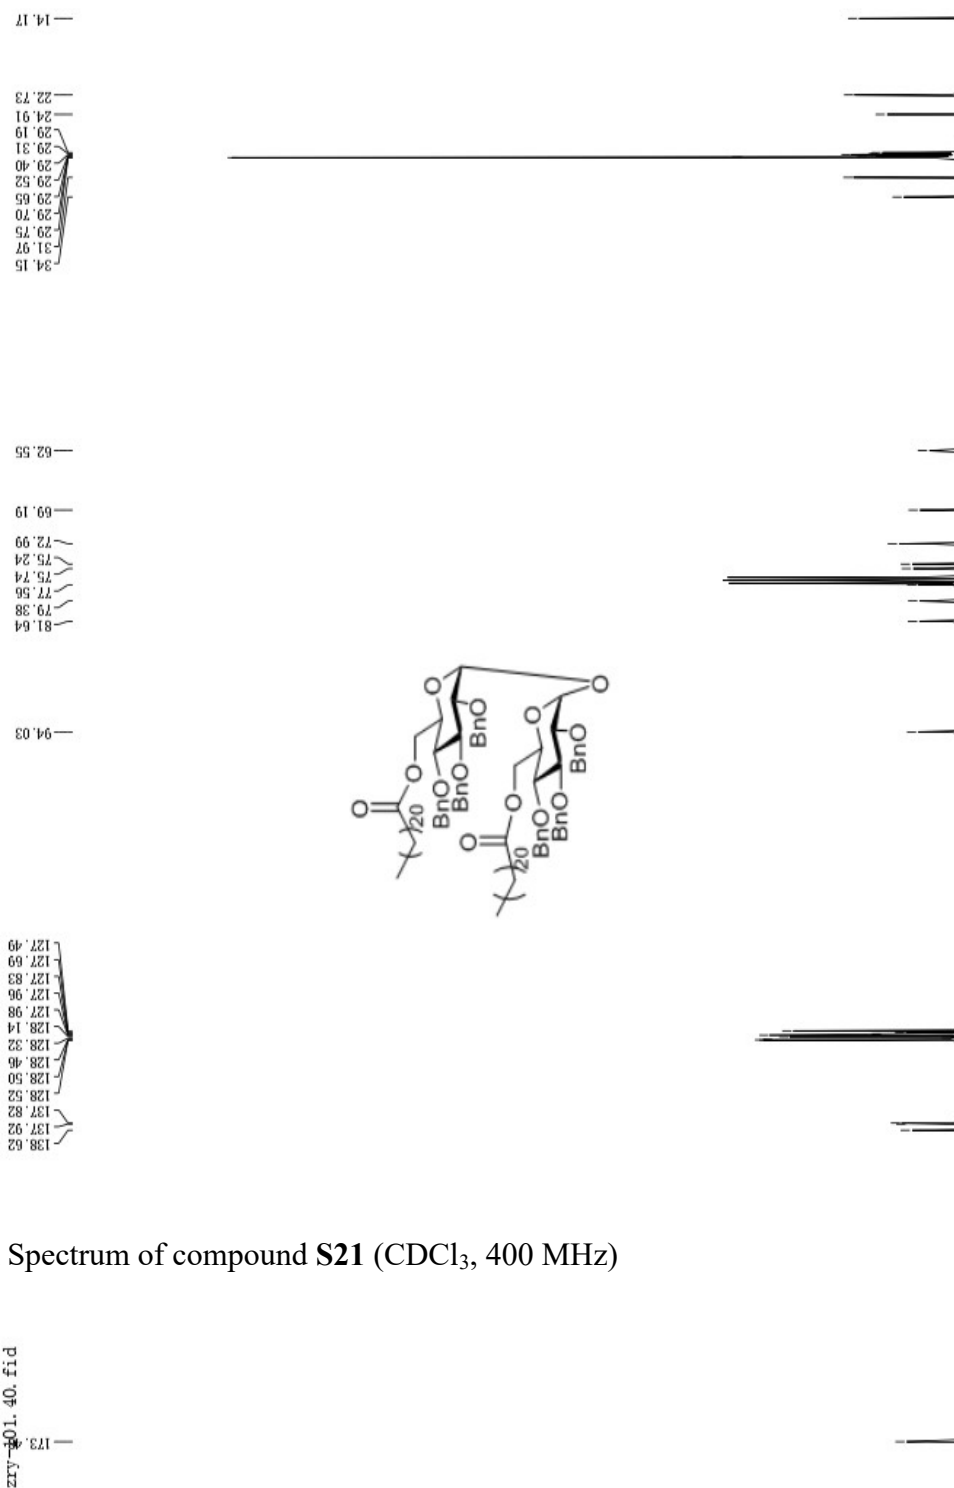

<sup>1</sup>H-<sup>1</sup>H COSY NMR Spectrum of compound **S21** (CDCl<sub>3</sub>, 400 MHz)

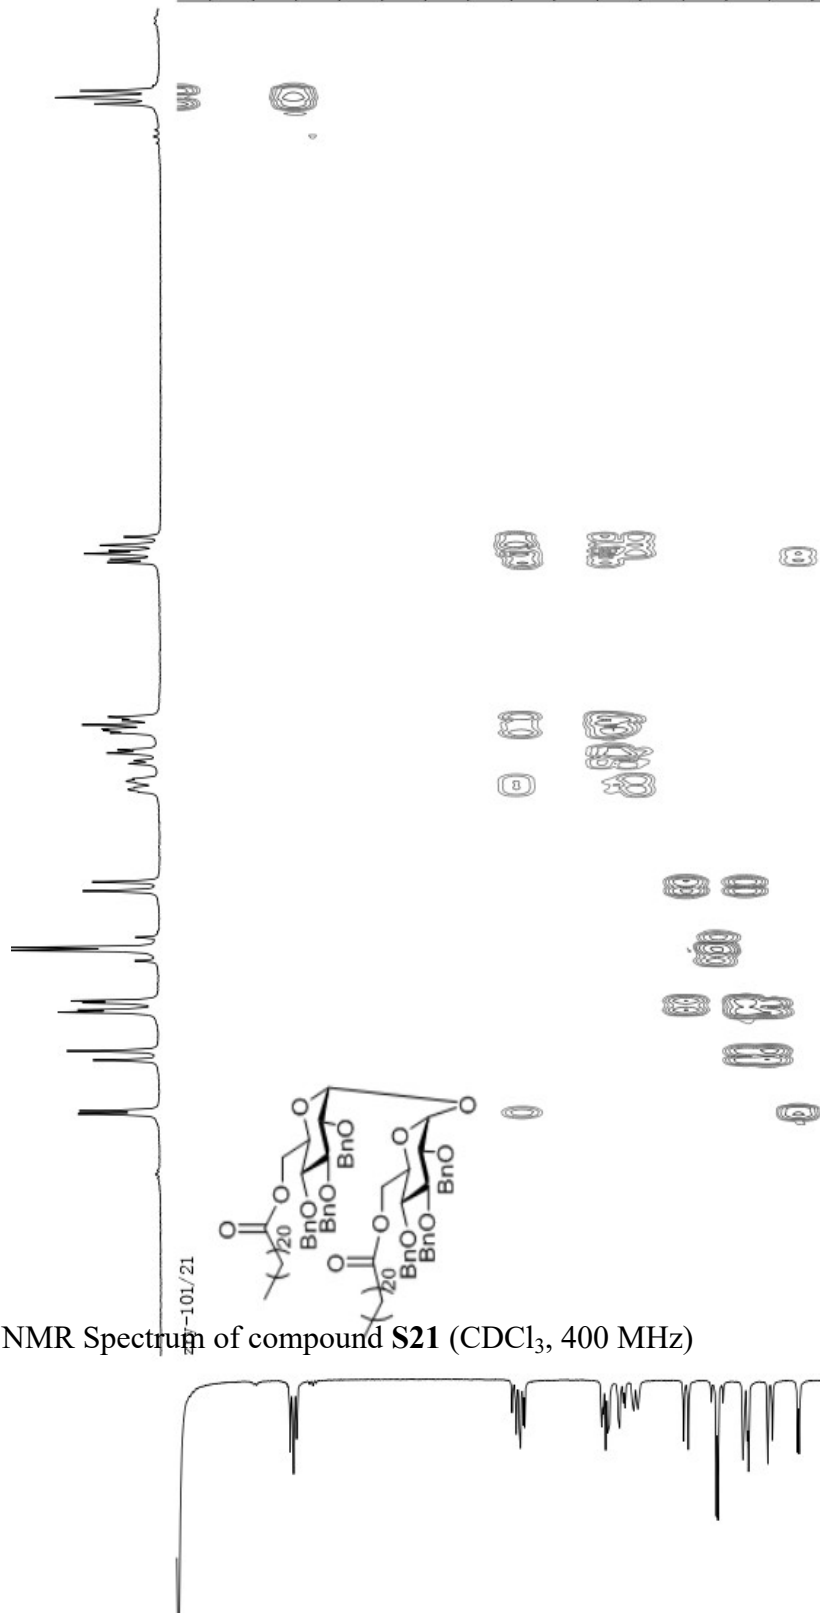



HSQC NMR Spectrum of compound **S21** (CDCl<sub>3</sub>, 400 MHz)

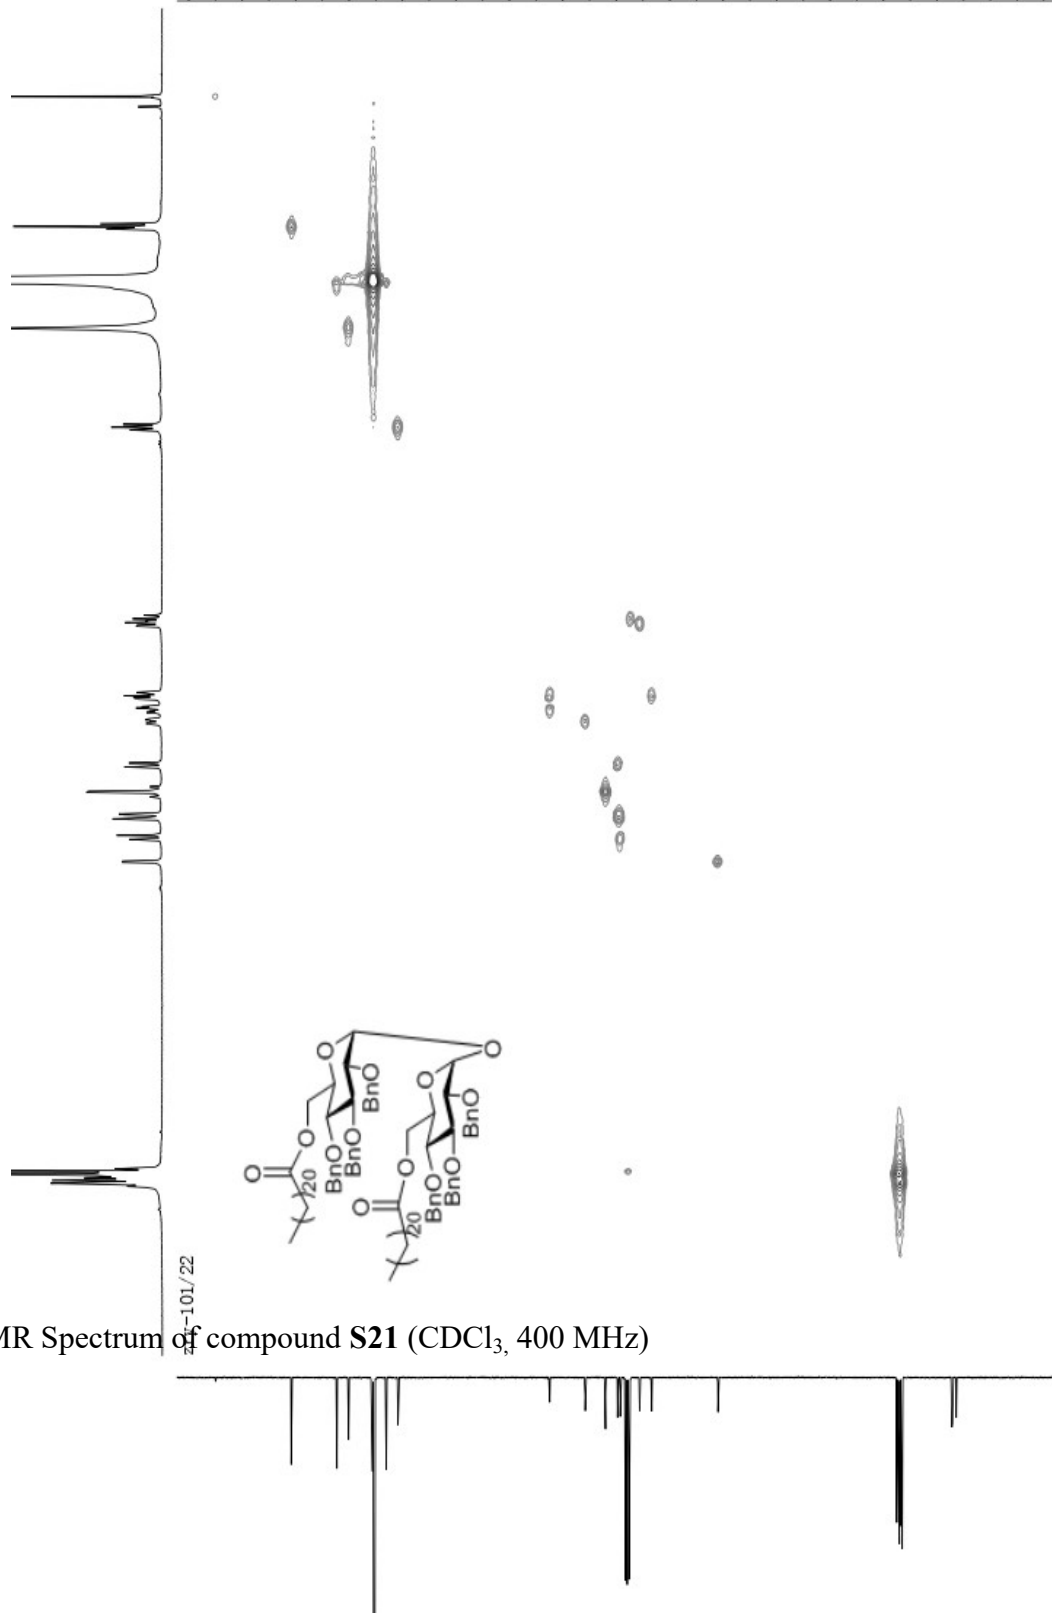

<sup>1</sup>H NMR Spectrum of vizantin (CDCl<sub>3</sub>, 400 MHz)

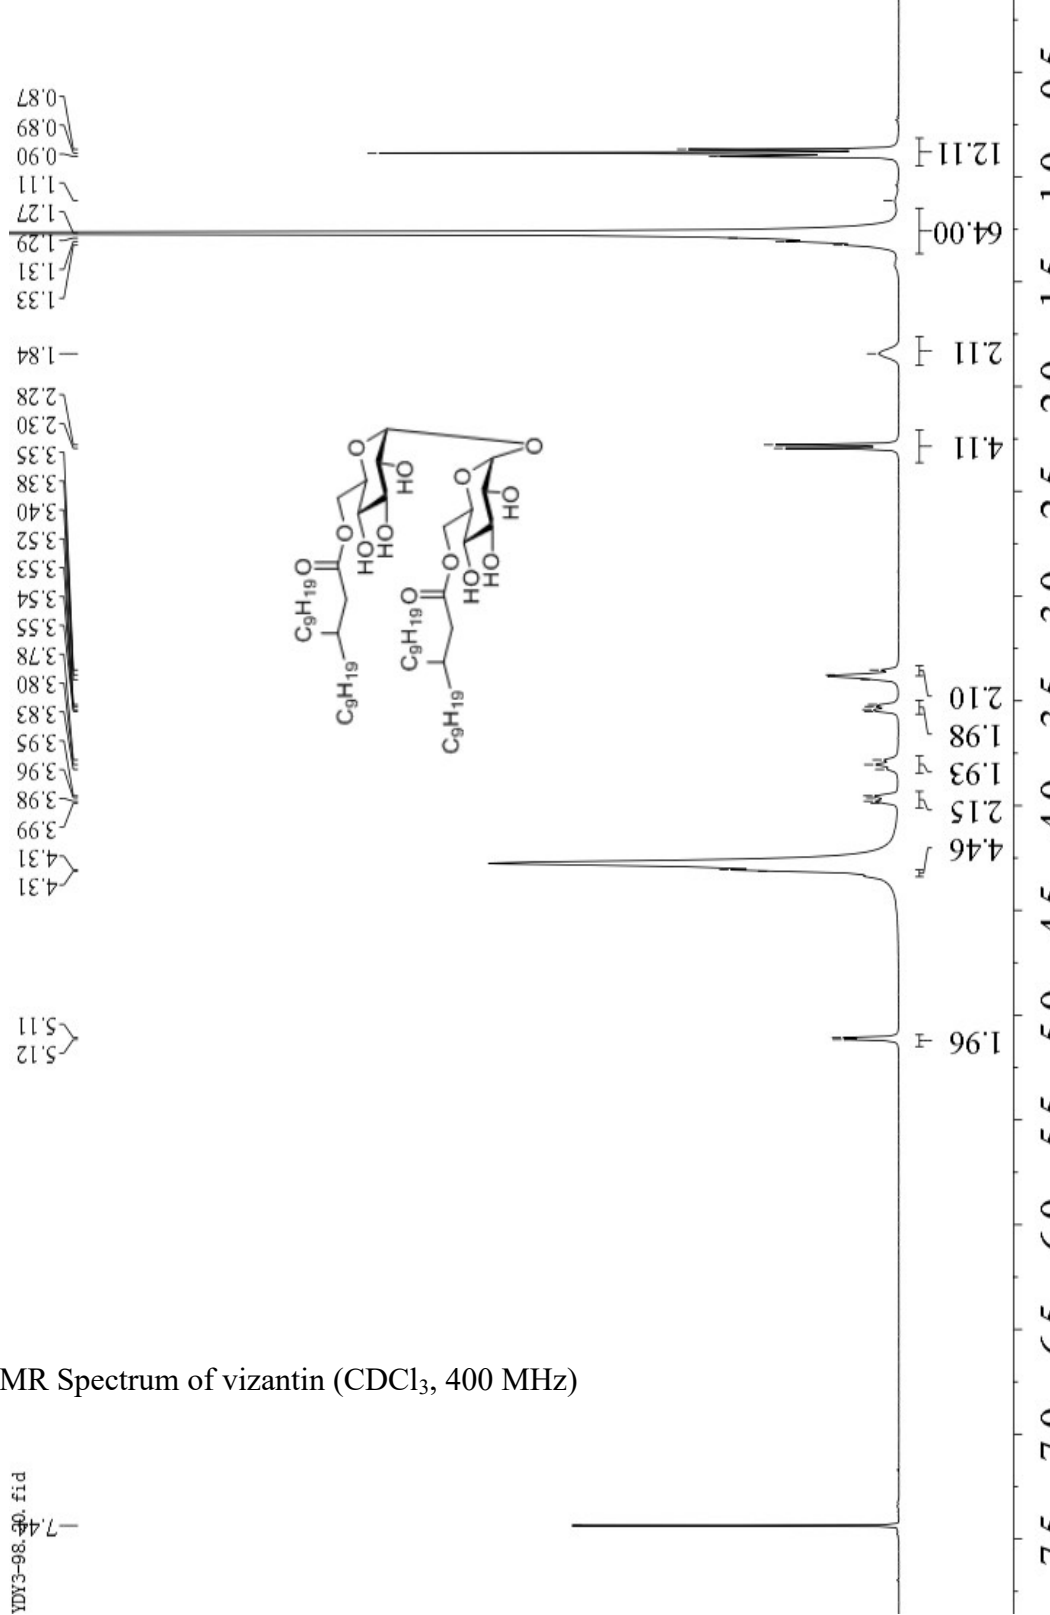

<sup>13</sup>C NMR Spectrum of vizantin (CDCl<sub>3</sub>, 400 MHz)

YDY3-98-3 0828.11. fid

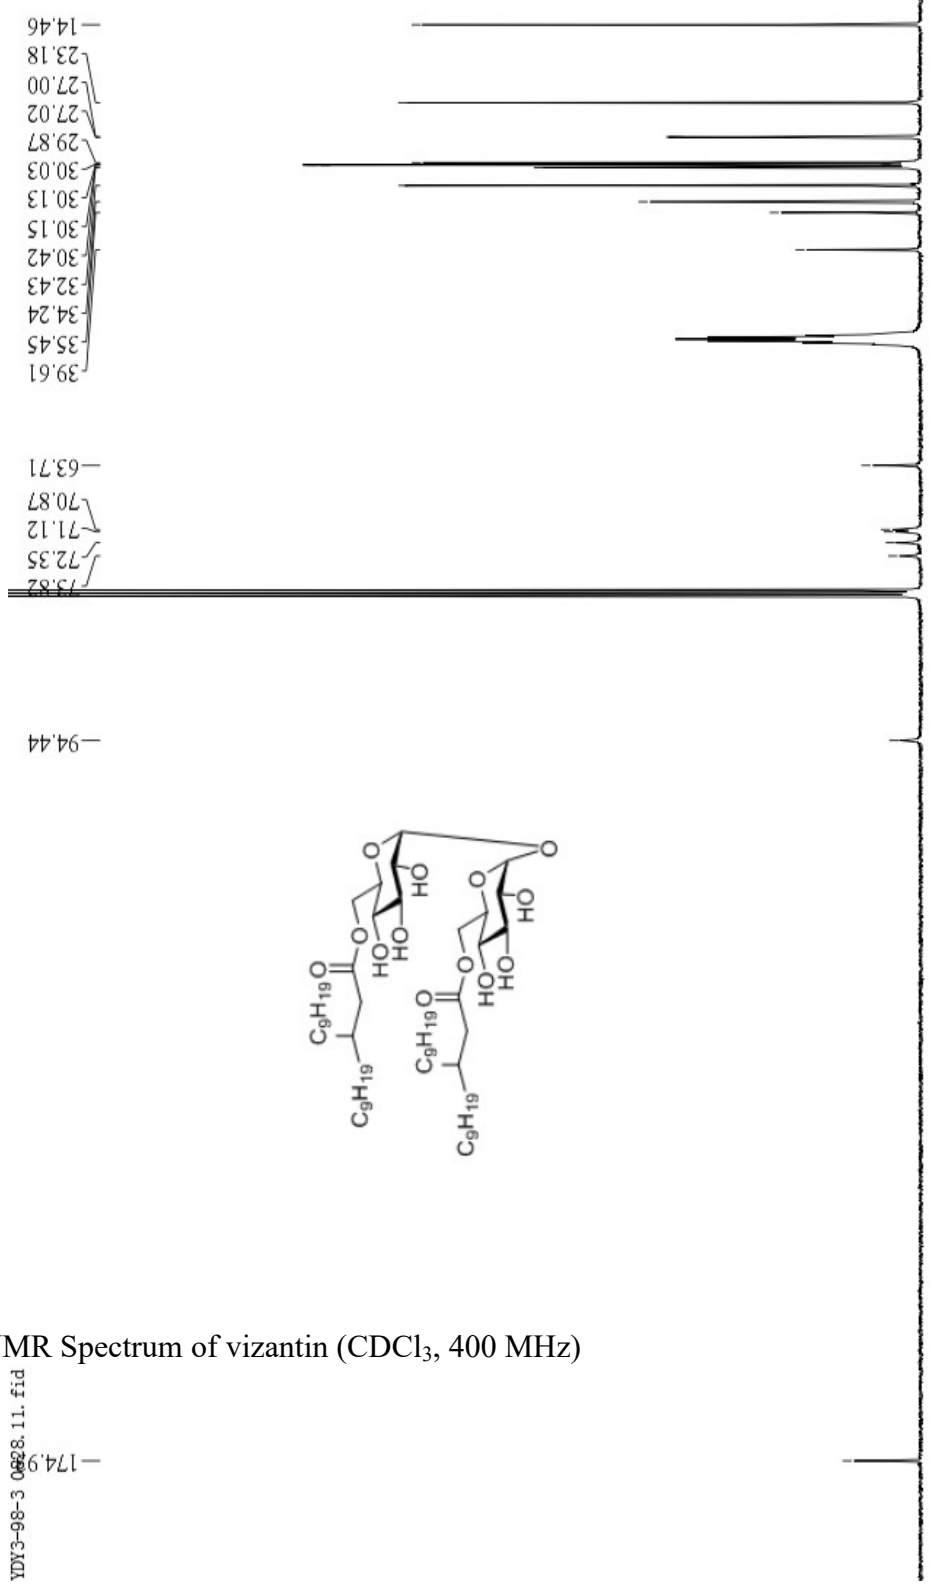

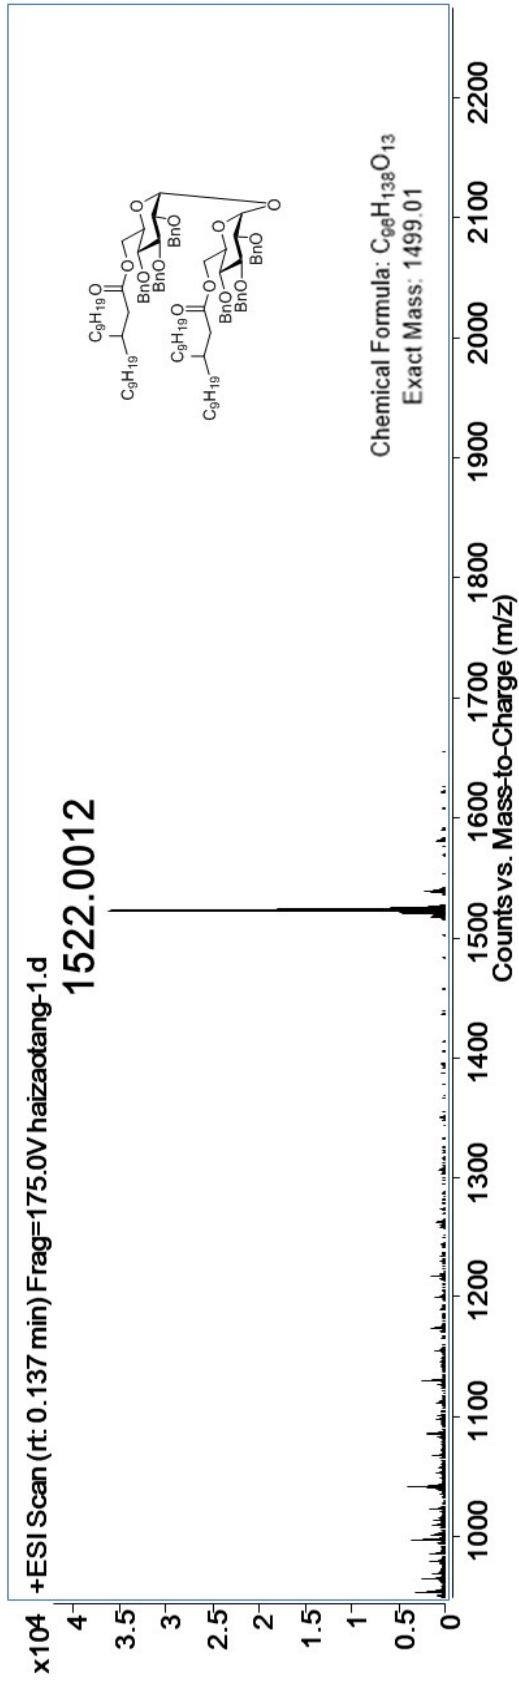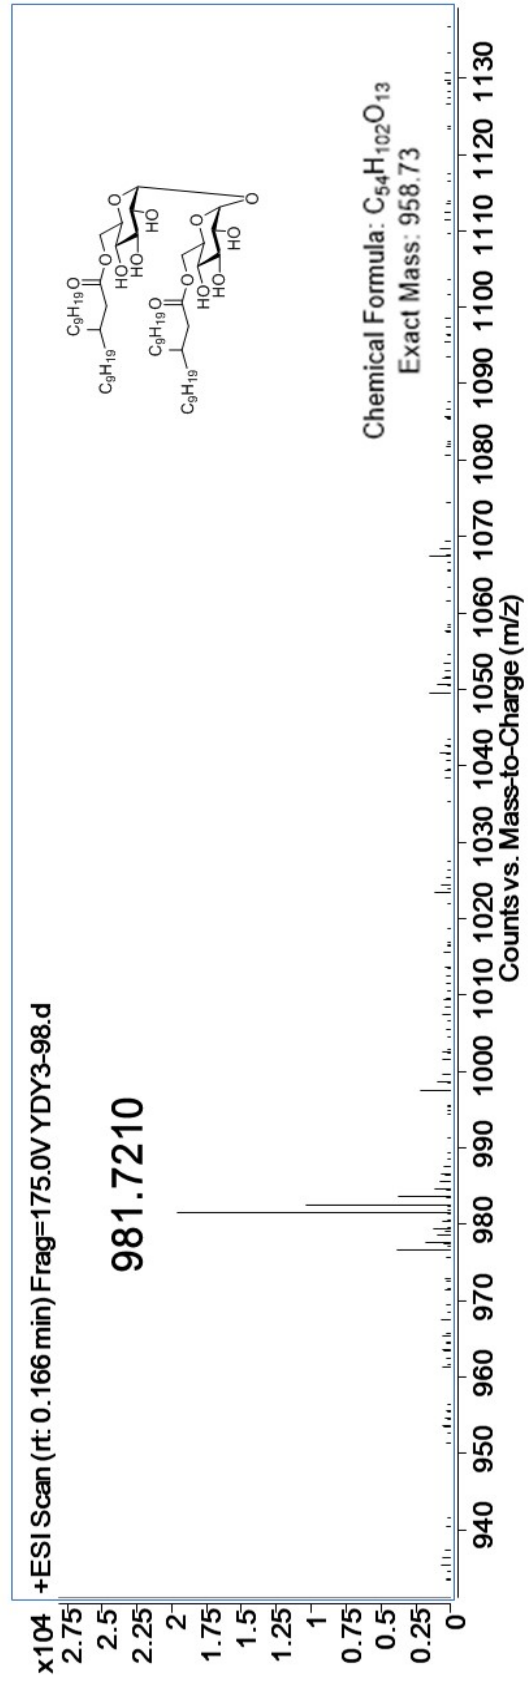

HRMS spectrum of **S20** and vizantin.

<sup>1</sup>H NMR Spectrum of TDB (CDCl<sub>3</sub>, 400 MHz)

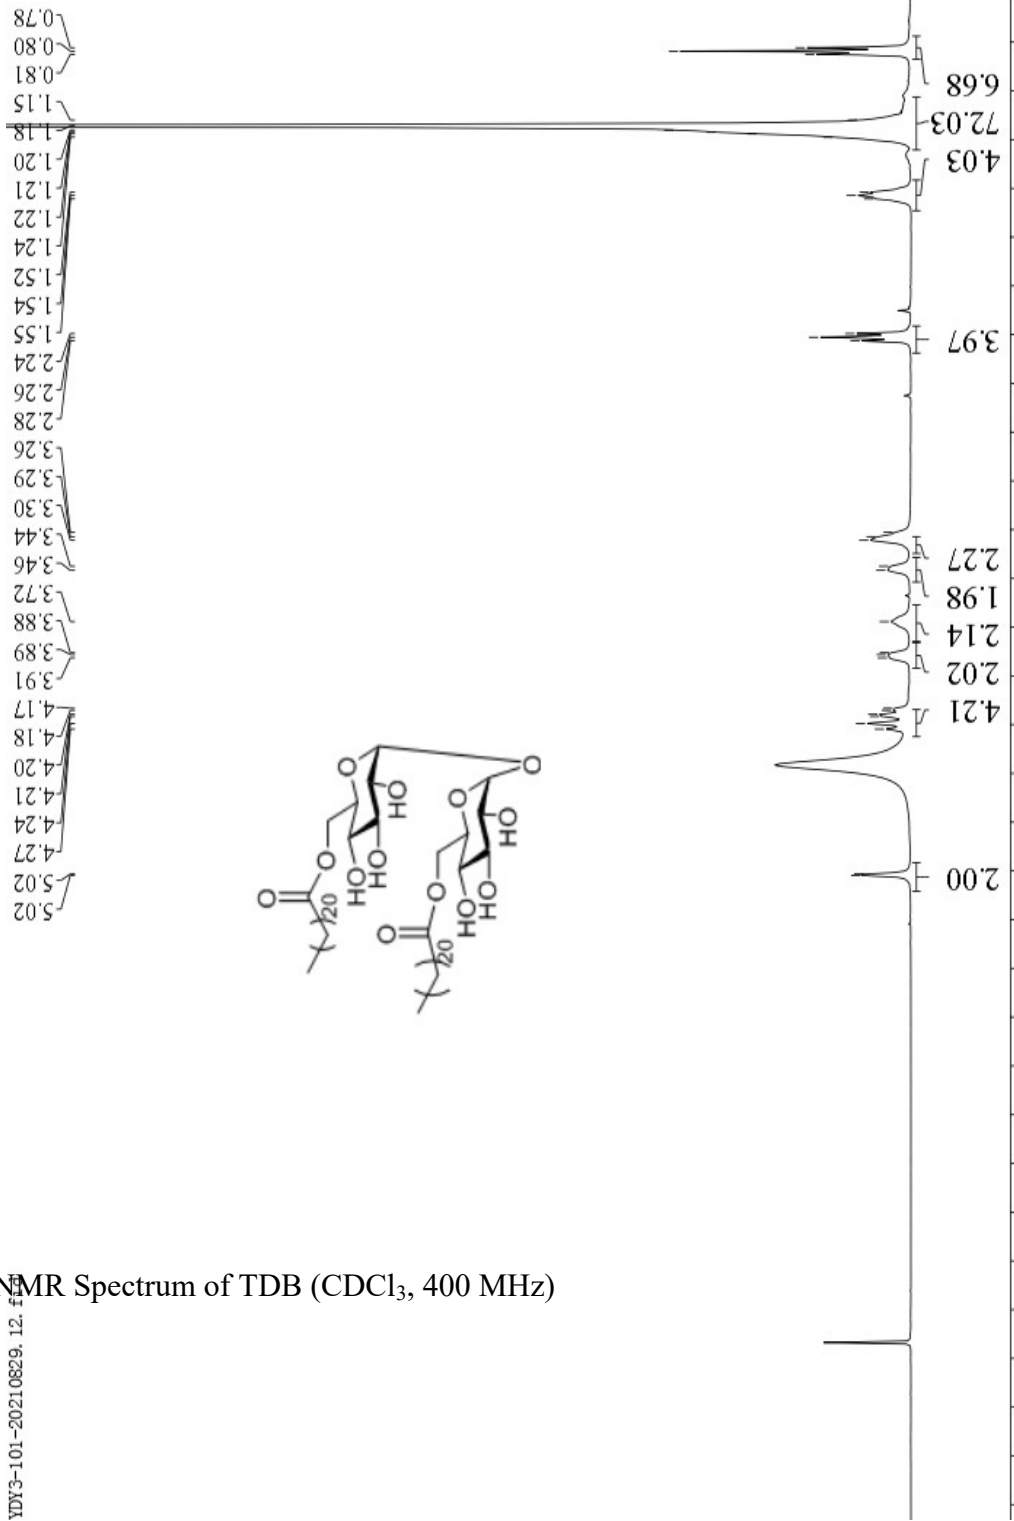

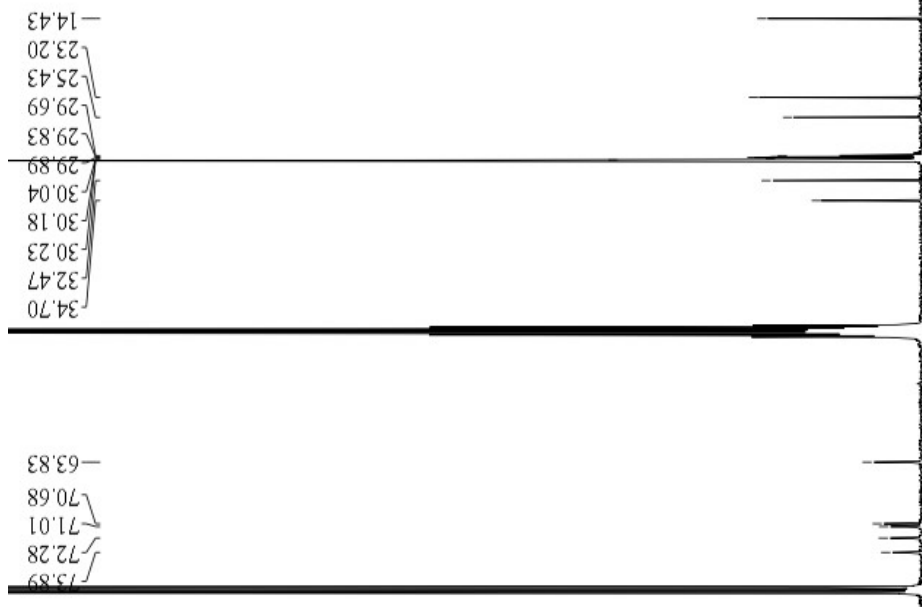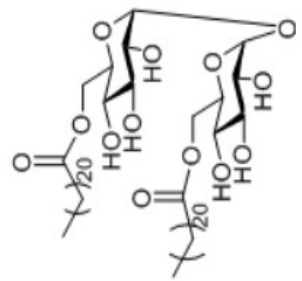

<sup>13</sup>C NMR Spectrum of TDB (CDCl<sub>3</sub>, 400 MHz)

YDY3-101-20210829. 11. fid  
-175.19

HSQC NMR Spectrum of TDB (CDCl<sub>3</sub>, 400 MHz)

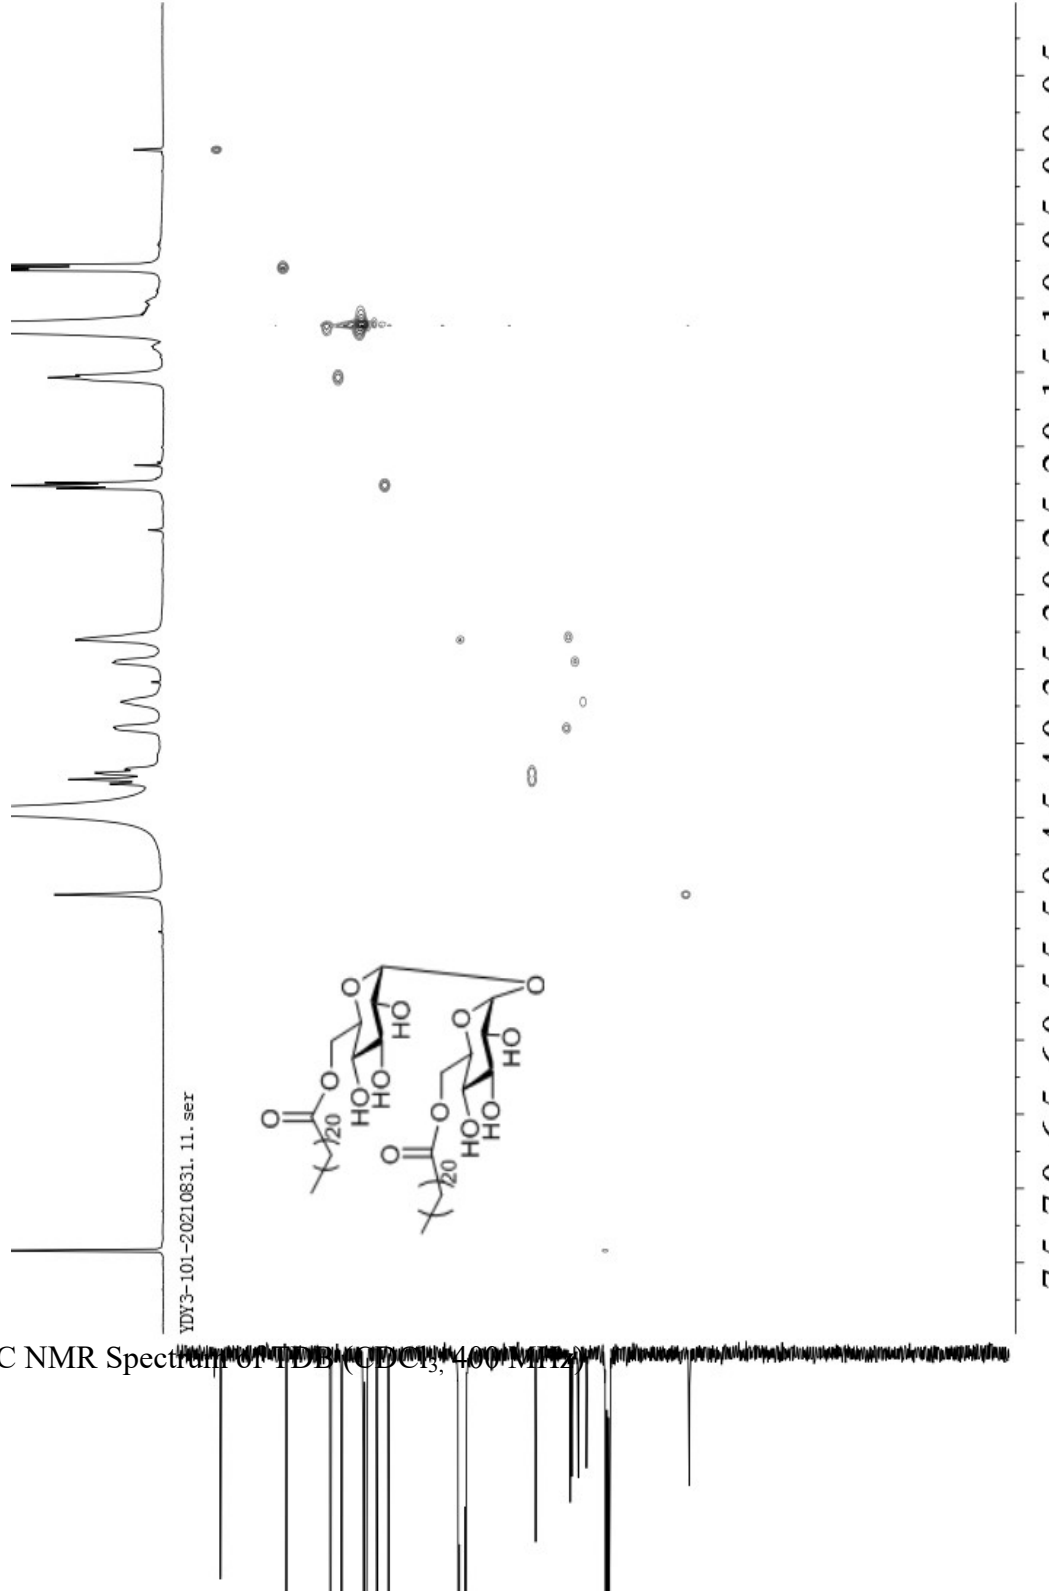

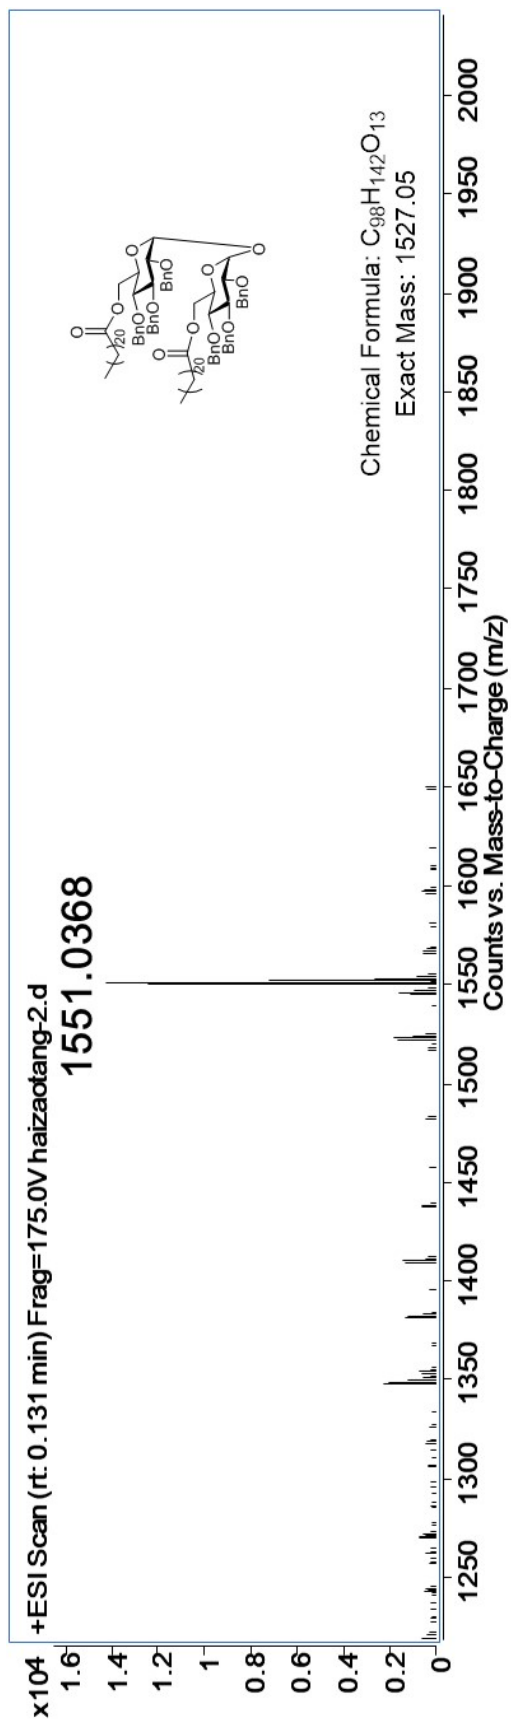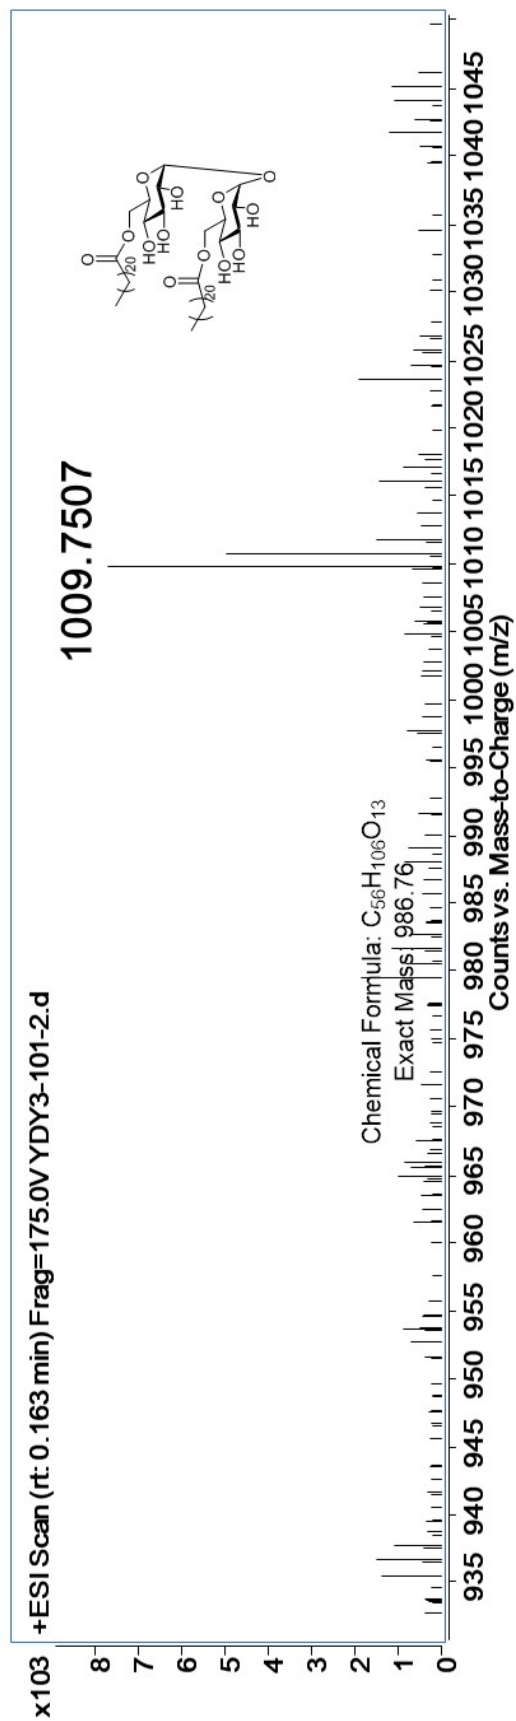

HRMS spectrum of S21 and TDB.
